# Supplementary material for: Characterization of limes (Citrus aurantifolia) grown in Bhutan and Indonesia using high-throughput sequencing
Source: PubMed Central journal article supplement (PMC5381282; doi:10.1038/srep04853), 2014-04-30
Supplement: srep04853-s1.pdf [file srep04853-s1.pdf]

## Supplementary Information

**Characterization of limes (*Citrus aurantifolia*) grown in Bhutan and Indonesia using high-throughput sequencing**

Tshering Penjor, Takashi Mimura, Ryoji Matsumoto, Masashi Yamamoto, and Yukio Nagano

## **Supplementary Figure Legends**

Supplementary Figure S1. The depth of RAD-seq coverage for each sample across a reference genome and the coverage histogram for each sample.

Supplementary Figure S2. Sites useful for genotyping among the eight accessions (clustal format).

Supplementary Figure S3. Sites useful for genotyping among the eight accessions (clustal format) in Category E.

Supplementary Figure S4. Sites useful for genotyping among the eight accessions (clustal format) in Category F.

Supplementary Figure S5. Sites useful for genotyping among the eight accessions (clustal format) in Category G.

Supplementary Figure S6. Sites useful for genotyping among the eight accessions (clustal format) in Category H.

Supplementary Figure S7. Sites useful for genotyping among the eight accessions (clustal format) in Category I.

Supplementary Figure S8. Sites useful for genotyping among the eight accessions (clustal

format) in Category J.

Supplementary Figure S9. Sites useful for genotyping among the eight accessions (clustal format) in Category K.

Supplementary Figure S10. Sites useful for genotyping among the eight accessions (clustal format) in Category L.

Supplementary Table S1. List of investigated local lime genetic resources in Bhutan

| Accession    | Place                              |           | Altitude | Latitude | Longitude |
|--------------|------------------------------------|-----------|----------|----------|-----------|
|              | Administrative area<br>(Zhonqkhaq) | Region    |          |          |           |
| Bhutan-09003 | Tsirang                            | Southwest | -        | -        | -         |
| Bhutan-09005 | Tsirang                            | Southwest | -        | -        | -         |
| Bhutan-09015 | Mongar                             | East      | 1276 m   | N 27.17° | E 91.13°  |
| Bhutan-09018 | Mongar                             | East      | 954 m    | N 27.16° | E 91.12°  |
| Bhutan-09019 | Mongar                             | East      | 725 m    | N 27.16° | E 91.08°  |
| Bhutan-09024 | Trashigang                         | East      | 1350 m   | N 27.17° | E 91.32°  |
| Bhutan-09027 | Trashigang                         | East      | 1588 m   | N 27.16° | E 91.32°  |
| Bhutan-09030 | Mongar                             | East      | 999 m    | N 27.16° | E 91.22°  |
| Bhutan-11006 | Mongar                             | East      | 1366 m   | N 27.15° | E 91.23°  |
| Bhutan-11009 | Samdrup Jongkhar                   | Southeast | 516 m    | N 26.52° | E 91.34°  |
| Bhutan-11014 | Samdrup Jongkhar                   | Southeast | 260 m    | N 26.51° | E 91.42°  |
| Bhutan-11018 | Pemagatsel                         | Southeast | 968 m    | N 27.00° | E 91.24°  |
| Bhutan-11026 | Trongsa                            | Midland   | 1068 m   | N 27.21° | E 90.33°  |
| Bhutan-11030 | Tsirang                            | Southwest | 1711 m   | N 26.58° | E 90.79°  |

Bhutan-09003 and Bhutan-09005 were purchased in the market.

Supplementary Table S2. Statistics of the alignment data created by bowtie program.

|                 | Mean coverage inside<br>of mapped regions | Standard deviations | Size of mapped<br>regions |
|-----------------|-------------------------------------------|---------------------|---------------------------|
| Bhutan-09015    | 654.4                                     | 4189                | 12.78Mb                   |
| Bhutan-09024    | 560.2                                     | 3308                | 13.27Mb                   |
| Bhutan-09027    | 301.0                                     | 1573                | 12.66Mb                   |
| Bhutan-09030    | 375.2                                     | 2229                | 12.69Mb                   |
| Bhutan-09005    | 298.5                                     | 1563                | 12.23Mb                   |
| Indonesia-88035 | 211.8                                     | 1095                | 11.90Mb                   |
| Indonesia-88045 | 149.6                                     | 1418                | 35.34Mb                   |
| Indonesia-88065 | 255.7                                     | 1404                | 11.30Mb                   |

Supplementary Table S3. Detailed summary of the analysis of the 42,613 sites genotyped in the current study

|                                                                            | Number of sites |
|----------------------------------------------------------------------------|-----------------|
| Category A.                                                                | 7,297           |
| Unique heterozygous genotypes are common to all eight accessions.          |                 |
| M (A or C) are common to all 8 accessions.                                 | 691             |
| R (A or G) are common to all 8 accessions.                                 | 2,118           |
| W (A or T) are common to all 8 accessions.                                 | 932             |
| S (C or G) are common to all 8 accessions.                                 | 544             |
| Y (C or T) are common to all 8 accessions.                                 | 2,237           |
| K (G or T) are common to all 8 accessions.                                 | 775             |
| Category B.                                                                | 4,026           |
| Unique homozygous genotypes are common to the Bhutanese cluster.           |                 |
| Other unique homozygous genotypes are common to the Indonesian cluster.    |                 |
| A are common to Bhutanese cluster, and C are common to Indonesian cluster. | 222             |
| A are common to Bhutanese cluster, and G are common to Indonesian cluster. | 622             |
| A are common to Bhutanese cluster, and T are common to Indonesian cluster. | 276             |
| C are common to Bhutanese cluster, and A are common to Indonesian cluster. | 202             |
| C are common to Bhutanese cluster, and G are common to Indonesian cluster. | 155             |
| C are common to Bhutanese cluster, and T are common to Indonesian cluster. | 585             |
| G are common to Bhutanese cluster, and A are common to Indonesian cluster. | 563             |
| G are common to Bhutanese cluster, and C are common to Indonesian cluster. | 137             |
| G are common to Bhutanese cluster, and T are common to Indonesian cluster. | 200             |
| T are common to Bhutanese cluster, and A are common to Indonesian cluster. | 255             |
| T are common to Bhutanese cluster, and C are common to Indonesian cluster. | 583             |
| T are common to Bhutanese cluster, and G are common to Indonesian cluster. | 226             |
| Category C.                                                                | 14,445          |
| Unique heterozygous genotypes are common to the Bhutanese cluster.         |                 |
| Unique homozygous genotypes are common to the Indonesian cluster.          |                 |
| M are common to Bhutanese cluster, and A are common to Indonesian cluster. | 668             |
| M are common to Bhutanese cluster, and C are common to Indonesian cluster. | 705             |
| R are common to Bhutanese cluster, and A are common to Indonesian cluster. | 2,166           |
| R are common to Bhutanese cluster, and G are common to Indonesian cluster. | 2,101           |
| W are common to Bhutanese cluster, and A are common to Indonesian cluster. | 903             |
| W are common to Bhutanese cluster, and G are common to Indonesian cluster. | 3               |
| W are common to Bhutanese cluster, and T are common to Indonesian cluster. | 869             |
| S are common to Bhutanese cluster, and C are common to Indonesian cluster. | 547             |
| S are common to Bhutanese cluster, and G are common to Indonesian cluster. | 539             |
| S are common to Bhutanese cluster, and T are common to Indonesian cluster. | 1               |
| Y are common to Bhutanese cluster, and A are common to Indonesian cluster. | 1               |
| Y are common to Bhutanese cluster, and C are common to Indonesian cluster. | 2,149           |
| Y are common to Bhutanese cluster, and T are common to Indonesian cluster. | 2,255           |
| K are common to Bhutanese cluster, and A are common to Indonesian cluster. | 3               |
| K are common to Bhutanese cluster, and G are common to Indonesian cluster. | 769             |
| K are common to Bhutanese cluster, and T are common to Indonesian cluster. | 766             |

|                                                                                                                                             |        |
|---------------------------------------------------------------------------------------------------------------------------------------------|--------|
| Category D.                                                                                                                                 | 10,912 |
| Unique homozygous genotypes are common to the Bhutanese cluster.                                                                            |        |
| Unique heterozygous genotypes are common to the Indonesian cluster.                                                                         |        |
| A are common to Bhutanese cluster, and M are common to Indonesian cluster.                                                                  | 536    |
| C are common to Bhutanese cluster, and M are common to Indonesian cluster.                                                                  | 471    |
| G are common to Bhutanese cluster, and M are common to Indonesian cluster.                                                                  | 1      |
| A are common to Bhutanese cluster, and R are common to Indonesian cluster.                                                                  | 1,702  |
| G are common to Bhutanese cluster, and R are common to Indonesian cluster.                                                                  | 1,529  |
| T are common to Bhutanese cluster, and R are common to Indonesian cluster.                                                                  | 1      |
| A are common to Bhutanese cluster, and W are common to Indonesian cluster.                                                                  | 702    |
| G are common to Bhutanese cluster, and W are common to Indonesian cluster.                                                                  | 3      |
| T are common to Bhutanese cluster, and W are common to Indonesian cluster.                                                                  | 682    |
| C are common to Bhutanese cluster, and S are common to Indonesian cluster.                                                                  | 438    |
| G are common to Bhutanese cluster, and S are common to Indonesian cluster.                                                                  | 427    |
| C are common to Bhutanese cluster, and Y are common to Indonesian cluster.                                                                  | 1,524  |
| G are common to Bhutanese cluster, and Y are common to Indonesian cluster.                                                                  | 1      |
| T are common to Bhutanese cluster, and Y are common to Indonesian cluster.                                                                  | 1,715  |
| A are common to Bhutanese cluster, and K are common to Indonesian cluster.                                                                  | 2      |
| C are common to Bhutanese cluster, and K are common to Indonesian cluster.                                                                  | 1      |
| G are common to Bhutanese cluster, and K are common to Indonesian cluster.                                                                  | 617    |
| T are common to Bhutanese cluster, and K are common to Indonesian cluster.                                                                  | 560    |
| Category E.                                                                                                                                 | 1,432  |
| Unique heterozygous genotypes are common to the Bhutanese cluster.                                                                          |        |
| Identical heterozygous genotypes and/or homozygous genotypes derived from the heterozygous genotypes are present in the Indonesian cluster. |        |
| M are common to Bhutanese cluster, and M and A are present in Indonesian cluster.                                                           | 58     |
| M are common to Bhutanese cluster, and M and C are present in Indonesian cluster.                                                           | 63     |
| M are common to Bhutanese cluster, and A and C are present in Indonesian cluster.                                                           | 2      |
| R are common to Bhutanese cluster, and R and A are present in Indonesian cluster.                                                           | 212    |
| R are common to Bhutanese cluster, and R and G are present in Indonesian cluster.                                                           | 194    |
| R are common to Bhutanese cluster, and A and G are present in Indonesian cluster.                                                           | 15     |
| W are common to Bhutanese cluster, and W and A are present in Indonesian cluster.                                                           | 78     |
| W are common to Bhutanese cluster, and W and T are present in Indonesian cluster.                                                           | 93     |
| W are common to Bhutanese cluster, and A and T are present in Indonesian cluster.                                                           | 8      |
| W are common to Bhutanese cluster, and W, A and T are present in Indonesian cluster.                                                        | 2      |
| S are common to Bhutanese cluster, and S and C are present in Indonesian cluster.                                                           | 68     |
| S are common to Bhutanese cluster, and S and G are present in Indonesian cluster.                                                           | 46     |
| S are common to Bhutanese cluster, and C and G are present in Indonesian cluster.                                                           | 5      |
| Y are common to Bhutanese cluster, and Y and C are present in Indonesian cluster.                                                           | 192    |
| Y are common to Bhutanese cluster, and Y and T are present in Indonesian cluster.                                                           | 207    |
| Y are common to Bhutanese cluster, and C and T are present in Indonesian cluster.                                                           | 27     |
| Y are common to Bhutanese cluster, and Y, C and T are present in Indonesian cluster.                                                        | 4      |
| K are common to Bhutanese cluster, and K and G are present in Indonesian cluster.                                                           | 76     |
| K are common to Bhutanese cluster, and K and T are present in Indonesian cluster.                                                           | 79     |
| K are common to Bhutanese cluster, and G and T are present in Indonesian cluster.                                                           | 1      |
| K are common to Bhutanese cluster, and K, G and T are present in Indonesian cluster.                                                        | 2      |

|                                                                                                                                            |       |
|--------------------------------------------------------------------------------------------------------------------------------------------|-------|
| Category F.                                                                                                                                | 134   |
| Unique heterozygous genotypes are common to the Indonesian cluster.                                                                        |       |
| Identical heterozygous genotypes and/or homozygous genotypes derived from the heterozygous genotypes are present in the Bhutanese cluster. |       |
| M and A are present in Bhutanese cluster, and M are common to Indonesian cluster.                                                          | 4     |
| M and C are present in Bhutanese cluster, and M are common to Indonesian cluster.                                                          | 4     |
| R and A are present in Bhutanese cluster, and R are common to Indonesian cluster.                                                          | 21    |
| R and G are present in Bhutanese cluster, and R are common to Indonesian cluster.                                                          | 24    |
| W and A are present in Bhutanese cluster, and W are common to Indonesian cluster.                                                          | 3     |
| W and T are present in Bhutanese cluster, and W are common to Indonesian cluster.                                                          | 6     |
| S and C are present in Bhutanese cluster, and S are common to Indonesian cluster.                                                          | 11    |
| S and G are present in Bhutanese cluster, and S are common to Indonesian cluster.                                                          | 3     |
| Y and C are present in Bhutanese cluster, and Y are common to Indonesian cluster.                                                          | 19    |
| Y and T are present in Bhutanese cluster, and Y are common to Indonesian cluster.                                                          | 27    |
| K and G are present in Bhutanese cluster, and K are common to Indonesian cluster.                                                          | 5     |
| K and T are present in Bhutanese cluster, and K are common to Indonesian cluster.                                                          | 7     |
| Category G.                                                                                                                                | 3,087 |
| Unique homozygous genotypes are common to the Bhutanese cluster.                                                                           |       |
| Unique heterozygous genotypes and homozygous genotypes derived from the heterozygous genotypes are present in the Indonesian cluster.      |       |
| A are common to Bhutanese cluster, and M and A are present in Indonesian cluster.                                                          | 129   |
| A are common to Bhutanese cluster, and M and C are present in Indonesian cluster.                                                          | 29    |
| A are common to Bhutanese cluster, and M, A and C are present in Indonesian cluster.                                                       | 2     |
| C are common to Bhutanese cluster, and M and A are present in Indonesian cluster.                                                          | 27    |
| C are common to Bhutanese cluster, and M and C are present in Indonesian cluster.                                                          | 126   |
| A are common to Bhutanese cluster, and R and A are present in Indonesian cluster.                                                          | 342   |
| A are common to Bhutanese cluster, and R and G are present in Indonesian cluster.                                                          | 108   |
| A are common to Bhutanese cluster, and R, A and G are present in Indonesian cluster.                                                       | 5     |
| G are common to Bhutanese cluster, and R and A are present in Indonesian cluster.                                                          | 100   |
| G are common to Bhutanese cluster, and R and G are present in Indonesian cluster.                                                          | 405   |
| G are common to Bhutanese cluster, and R, A and G are present in Indonesian cluster.                                                       | 7     |
| A are common to Bhutanese cluster, and W and A are present in Indonesian cluster.                                                          | 165   |
| A are common to Bhutanese cluster, and W and T are present in Indonesian cluster.                                                          | 38    |
| A are common to Bhutanese cluster, and W, A and T are present in Indonesian cluster.                                                       | 4     |
| T are common to Bhutanese cluster, and W and A are present in Indonesian cluster.                                                          | 33    |
| T are common to Bhutanese cluster, and W and T are present in Indonesian cluster.                                                          | 170   |
| T are common to Bhutanese cluster, and W, A and T are present in Indonesian cluster.                                                       | 4     |
| C are common to Bhutanese cluster, and S and C are present in Indonesian cluster.                                                          | 82    |
| C are common to Bhutanese cluster, and S and G are present in Indonesian cluster.                                                          | 13    |
| C are common to Bhutanese cluster, and C, C and G are present in Indonesian cluster.                                                       | 1     |
| G are common to Bhutanese cluster, and S and C are present in Indonesian cluster.                                                          | 19    |
| G are common to Bhutanese cluster, and S and G are present in Indonesian cluster.                                                          | 74    |
| G are common to Bhutanese cluster, and S, C and G are present in Indonesian cluster.                                                       | 1     |
| C are common to Bhutanese cluster, and Y and C are present in Indonesian cluster.                                                          | 333   |
| C are common to Bhutanese cluster, and Y and T are present in Indonesian cluster.                                                          | 97    |
| C are common to Bhutanese cluster, and Y, C and T are present in Indonesian cluster.                                                       | 7     |
| T are common to Bhutanese cluster, and Y and C are present in Indonesian cluster.                                                          | 89    |



|                                                                                                                                      |            |
|--------------------------------------------------------------------------------------------------------------------------------------|------------|
| T are common to Bhutanese cluster, and Y and T are present in Indonesian cluster.                                                    | 337        |
| T are common to Bhutanese cluster, and Y, C and T are present in Indonesian cluster.                                                 | 9          |
| G are common to Bhutanese cluster, and K and G are present in Indonesian cluster.                                                    | 132        |
| G are common to Bhutanese cluster, and K and T are present in Indonesian cluster.                                                    | 30         |
| G are common to Bhutanese cluster, and K, G and T are present in Indonesian cluster.                                                 | 1          |
| T are common to Bhutanese cluster, and K and G are present in Indonesian cluster.                                                    | 26         |
| T are common to Bhutanese cluster, and K and T are present in Indonesian cluster.                                                    | 141        |
| T are common to Bhutanese cluster, and K, G and T are present in Indonesian cluster.                                                 | 1          |
| <b>Category H.</b>                                                                                                                   | <b>597</b> |
| Unique homozygous genotypes are common to the Indonesian cluster.                                                                    |            |
| Unique heterozygous genotypes and homozygous genotypes derived from the heterozygous genotypes are present in the Bhutanese cluster. |            |
| M and A are present in Bhutanese cluster, and A are common to Indonesian cluster.                                                    | 14         |
| M and C are present in Bhutanese cluster, and A are common to Indonesian cluster.                                                    | 6          |
| M and A are present in Bhutanese cluster, and C are common to Indonesian cluster.                                                    | 15         |
| M and C are present in Bhutanese cluster, and C are common to Indonesian cluster.                                                    | 17         |
| R and A are present in Bhutanese cluster, and A are common to Indonesian cluster.                                                    | 68         |
| R and G are present in Bhutanese cluster, and A are common to Indonesian cluster.                                                    | 27         |
| R and A are present in Bhutanese cluster, and G are common to Indonesian cluster.                                                    | 49         |
| R and G are present in Bhutanese cluster, and G are common to Indonesian cluster.                                                    | 69         |
| R, A and G are present in Bhutanese cluster, and G are common to Indonesian cluster.                                                 | 4          |
| W and A are present in Bhutanese cluster, and A are common to Indonesian cluster.                                                    | 22         |
| W and T are present in Bhutanese cluster, and A are common to Indonesian cluster.                                                    | 12         |
| W and A are present in Bhutanese cluster, and T are common to Indonesian cluster.                                                    | 8          |
| W and T are present in Bhutanese cluster, and T are common to Indonesian cluster.                                                    | 21         |
| W, A and T are present in Bhutanese cluster, and T are common to Indonesian cluster.                                                 | 1          |
| S and C are present in Bhutanese cluster, and C are common to Indonesian cluster.                                                    | 15         |
| S and G are present in Bhutanese cluster, and C are common to Indonesian cluster.                                                    | 3          |
| S, C and G are present in Bhutanese cluster, and C are common to Indonesian cluster.                                                 | 2          |
| S and C are present in Bhutanese cluster, and G are common to Indonesian cluster.                                                    | 11         |
| S and G are present in Bhutanese cluster, and G are common to Indonesian cluster.                                                    | 8          |
| Y and C are present in Bhutanese cluster, and C are common to Indonesian cluster.                                                    | 62         |
| Y and T are present in Bhutanese cluster, and C are common to Indonesian cluster.                                                    | 27         |
| Y and C are present in Bhutanese cluster, and T are common to Indonesian cluster.                                                    | 25         |
| Y and T are present in Bhutanese cluster, and T are common to Indonesian cluster.                                                    | 42         |
| K and G are present in Bhutanese cluster, and G are common to Indonesian cluster.                                                    | 23         |
| K and T are present in Bhutanese cluster, and G are common to Indonesian cluster.                                                    | 10         |
| K and G are present in Bhutanese cluster, and T are common to Indonesian cluster.                                                    | 11         |
| K and T are present in Bhutanese cluster, and T are common to Indonesian cluster.                                                    | 24         |
| K, G and T are present in Bhutanese cluster, and T are common to Indonesian cluster.                                                 | 1          |
| <b>Category I.</b>                                                                                                                   | <b>242</b> |
| Heterozygous and homozygous genotypes are distributed among eight accessions.                                                        |            |
| <b>Category J.</b>                                                                                                                   | <b>242</b> |
| Unique homozygous genotypes are common to the Bhutanese cluster.                                                                     |            |
| Identical homozygous genotypes and other homozygous genotypes are present in the Indonesian cluster.                                 |            |
| A are common to Bhutanese cluster, and A and C are present in Indonesian cluster.                                                    | 8          |

|                                                                                      |        |
|--------------------------------------------------------------------------------------|--------|
| A are common to Bhutanese cluster, and A and G are present in Indonesian cluster.    | 26     |
| A are common to Bhutanese cluster, and A and T are present in Indonesian cluster.    | 21     |
| C are common to Bhutanese cluster, and A and C are present in Indonesian cluster.    | 23     |
| C are common to Bhutanese cluster, and C and G are present in Indonesian cluster.    | 6      |
| C are common to Bhutanese cluster, and C and T are present in Indonesian cluster.    | 25     |
| C are common to Bhutanese cluster, and A, C and T are present in Indonesian cluster. | 1      |
| G are common to Bhutanese cluster, and A and G are present in Indonesian cluster.    | 48     |
| G are common to Bhutanese cluster, and C and G are present in Indonesian cluster.    | 6      |
| G are common to Bhutanese cluster, and G and T are present in Indonesian cluster.    | 14     |
| G are common to Bhutanese cluster, and A, C and G are present in Indonesian cluster. | 1      |
| G are common to Bhutanese cluster, and A, G and T are present in Indonesian cluster. | 1      |
| G are common to Bhutanese cluster, and C, G and T are present in Indonesian cluster. | 1      |
| T are common to Bhutanese cluster, and A and T are present in Indonesian cluster.    | 17     |
| T are common to Bhutanese cluster, and C and T are present in Indonesian cluster.    | 32     |
| T are common to Bhutanese cluster, and G and T are present in Indonesian cluster.    | 11     |
| T are common to Bhutanese cluster, and A and C are present in Indonesian cluster.    | 1      |
| Category K.                                                                          | 2      |
| Two kinds of homozygous genotypes are present in the Bhutanese cluster.              |        |
| Unique homozygous genotypes are common to the Indonesian cluster.                    |        |
| A and T are present in Bhutanese cluster, and A are common to Indonesian cluster.    | 1      |
| A and G are present in Bhutanese cluster, and G are common to Indonesian cluster.    | 1      |
| Category L.                                                                          | 197    |
| Different kinds of heterozygous genotypes are distributed among eight accessions.    |        |
| Total number of genotypes.                                                           | 42,613 |

Supplementary Table S4. Number of genotype matches between each accession of the Bhutanese cluster in category F.

|              | Bhutan-09015 | Bhutan-09024 | Bhutan-09027 |
|--------------|--------------|--------------|--------------|
| Bhutan-09024 | 78           |              |              |
| Bhutan-09027 | 52           | 50           |              |
| Bhutan-09030 | 65           | 131          | 69           |

Supplementary Table S5. Number of genotype matches between each accession of the Bhutanese cluster in category H.

|              | Bhutan-09015 | Bhutan-09024 | Bhutan-09027 |
|--------------|--------------|--------------|--------------|
| Bhutan-09024 | 342          |              |              |
| Bhutan-09027 | 213          | 215          |              |
| Bhutan-09030 | 280          | 257          | 287          |

Supplementary Table S6. Number of genotype matches between each accession in category I.

|                 | Bhutan-09015 | Bhutan-09024 | Bhutan-09027 | Bhutan-09030 | Bhutan-09005 | Indonesia-88035 | Indonesia-88045 |
|-----------------|--------------|--------------|--------------|--------------|--------------|-----------------|-----------------|
| Bhutan-09024    | 140          |              |              |              |              |                 |                 |
| Bhutan-09027    | 136          | 120          |              |              |              |                 |                 |
| Bhutan-09030    | 134          | 120          | 169          |              |              |                 |                 |
| Bhutan-09005    | 90           | 71           | 119          | 110          |              |                 |                 |
| Indonesia-88035 | 91           | 103          | 66           | 57           | 53           |                 |                 |
| Indonesia-88045 | 82           | 106          | 66           | 55           | 53           | 179             |                 |
| Indonesia-88065 | 92           | 86           | 66           | 88           | 131          | 110             | 111             |

# Supplementary Figure S1.

The depth of RAD-seq coverage for the sample Bhutan-09015 across a reference genome.

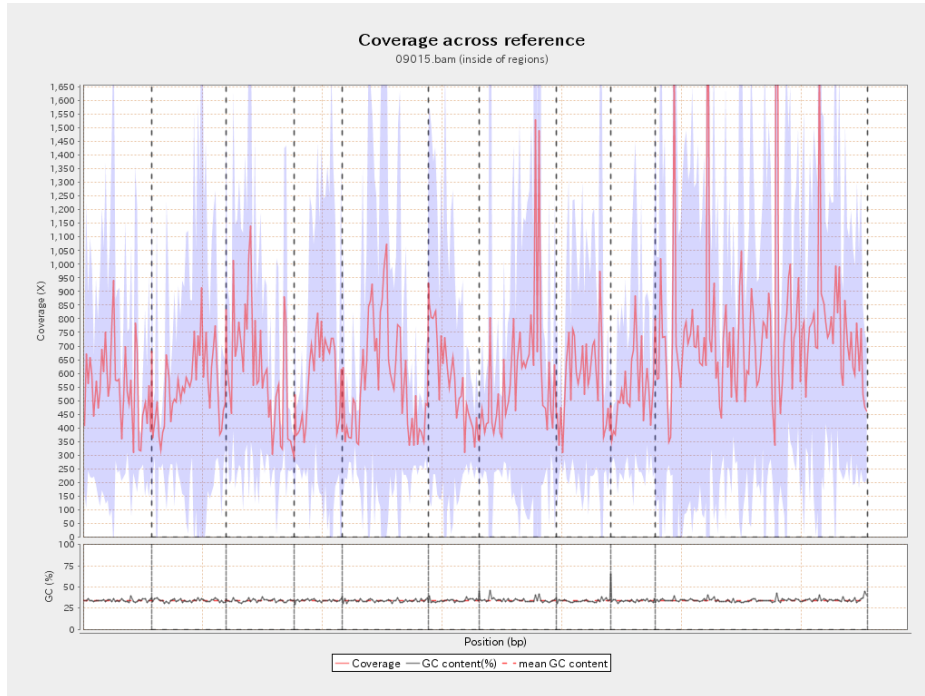

The coverage histogram for the sample Bhutan-09015.

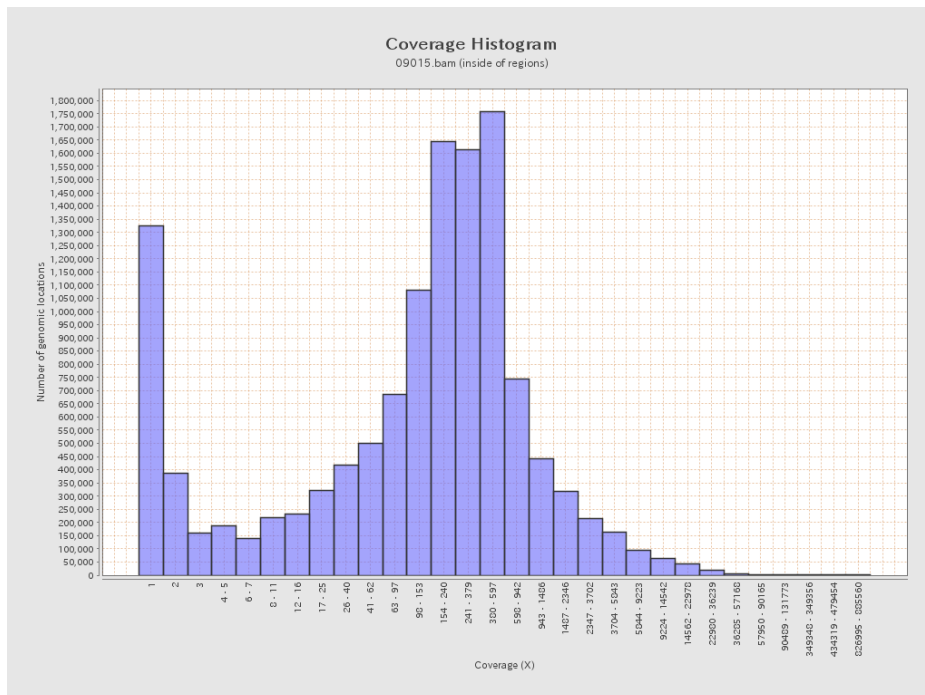

The depth of RAD-seq coverage for the sample Bhutan-09024 across a reference genome.

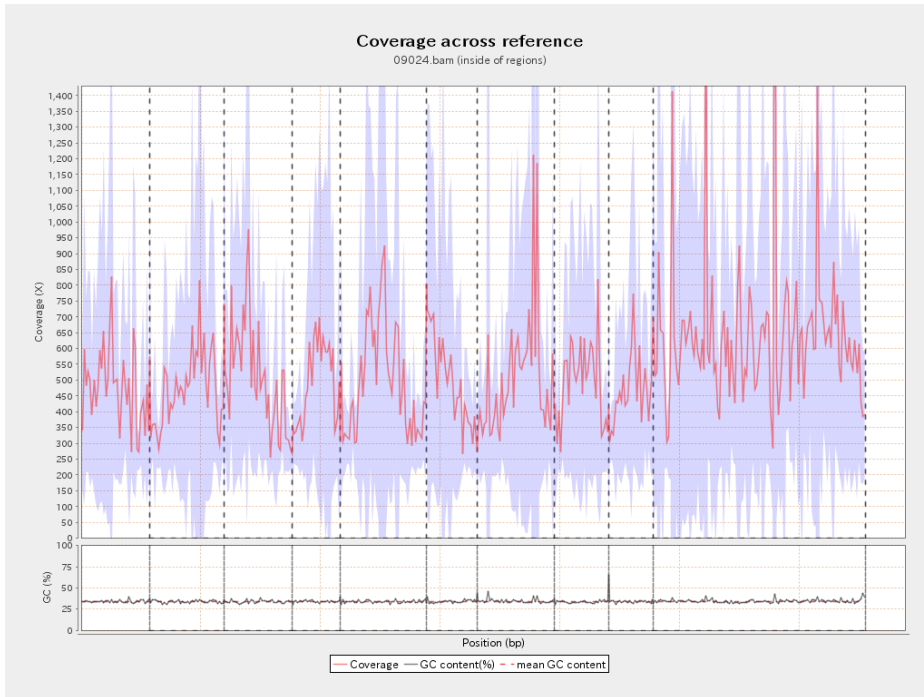

The coverage histogram for the sample Bhutan-09024.

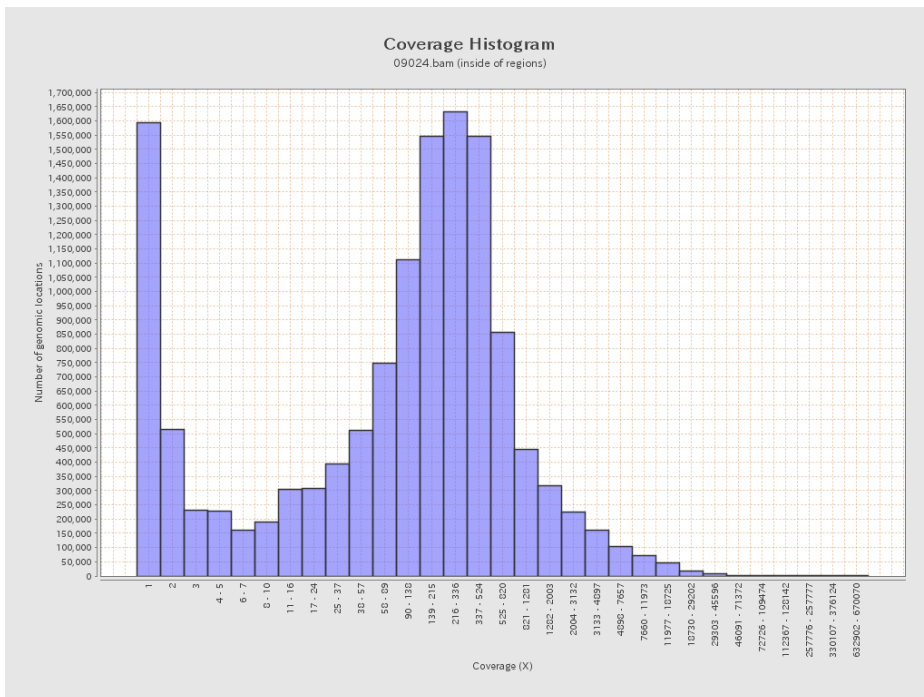

The depth of RAD-seq coverage for the sample Bhutan-09027 across a reference genome.

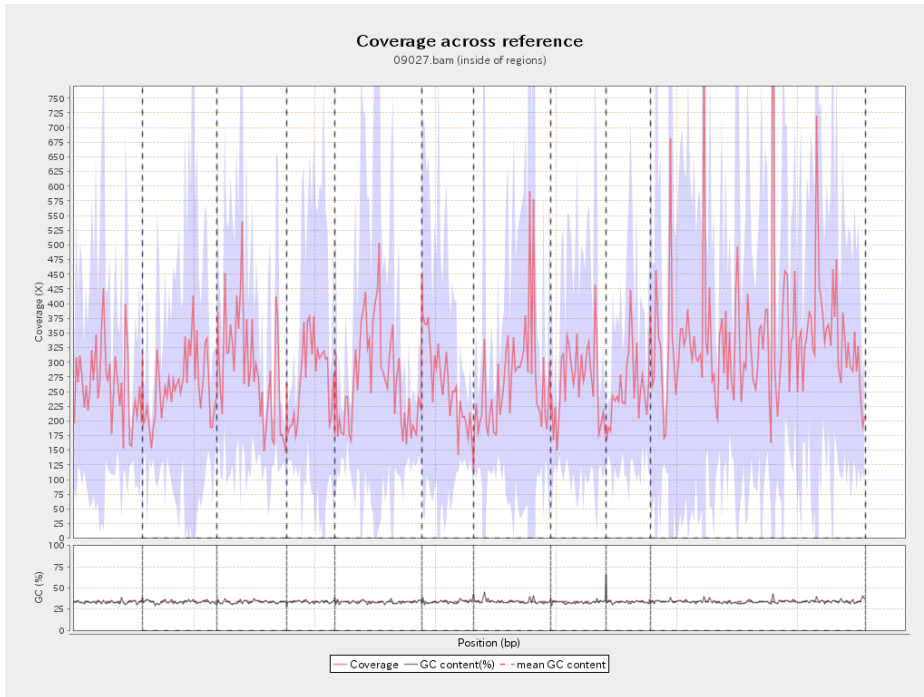

The coverage histogram for the sample Bhutan-09027.

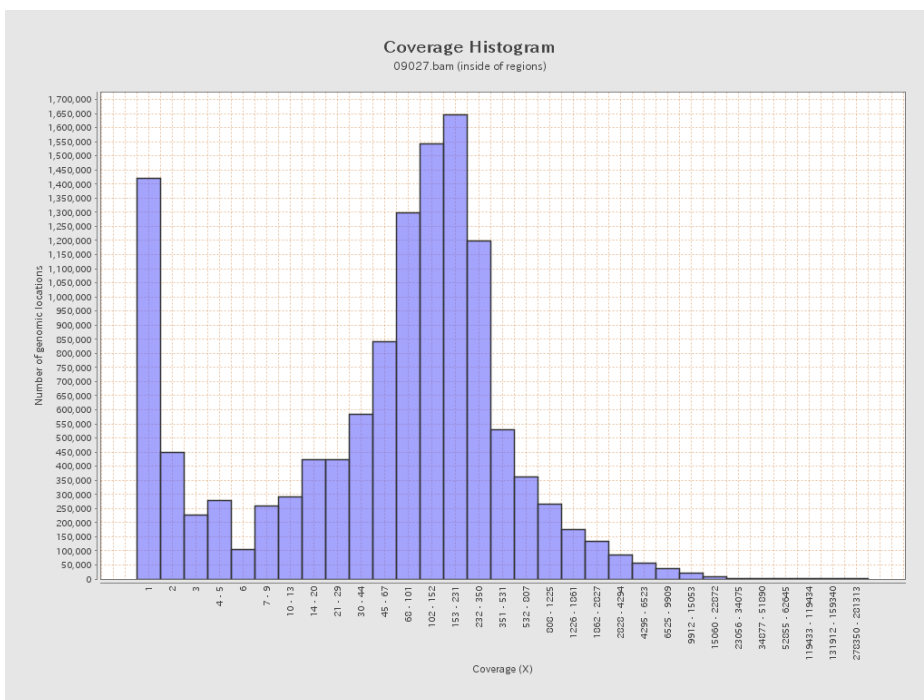



The depth of RAD-seq coverage for the sample Bhutan-09030 across a reference genome.

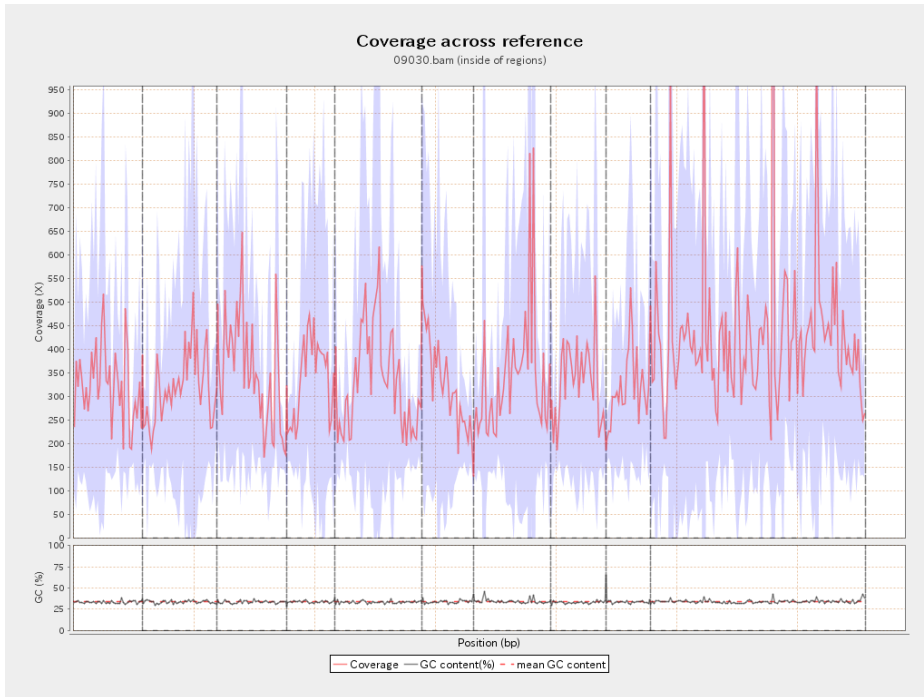

The coverage histogram for the sample Bhutan-09030.

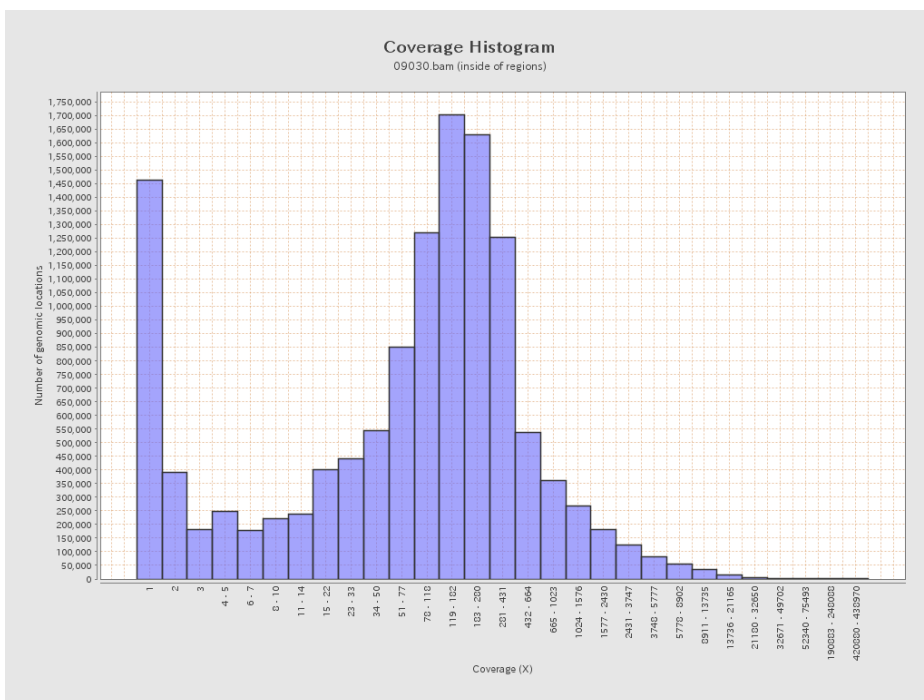

The depth of RAD-seq coverage for the sample Bhutan-09005 across a reference genome.

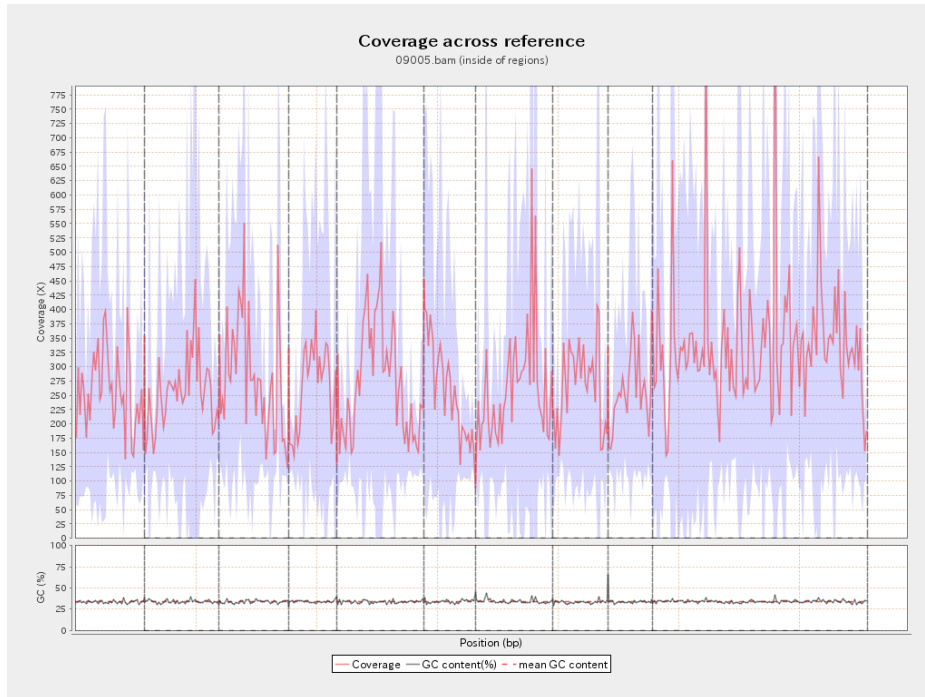

The coverage histogram for the sample Bhutan-09005.

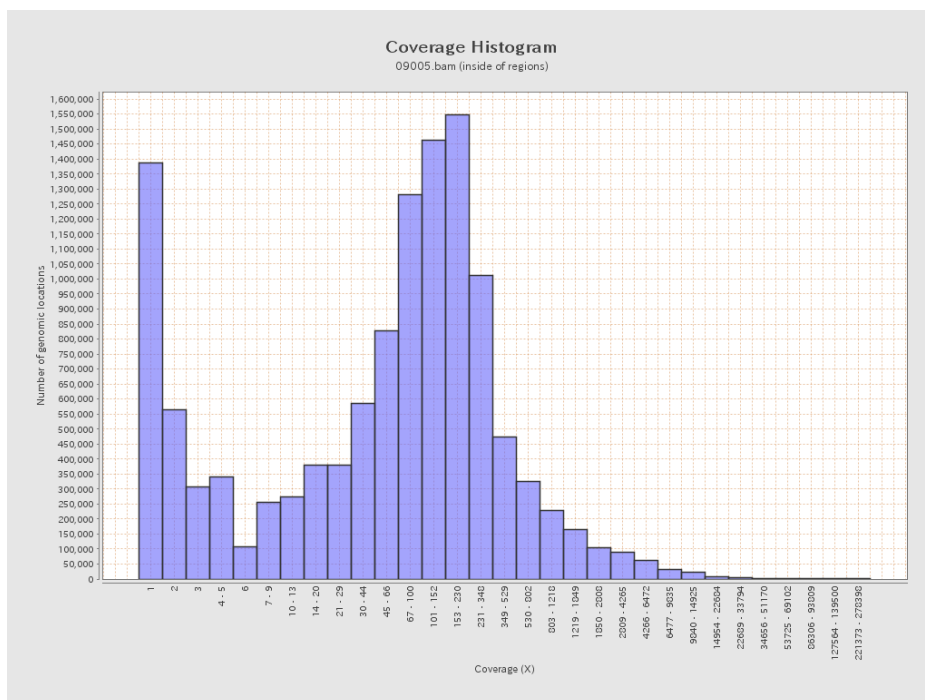

The depth of RAD-seq coverage for the sample Bhutan-88035 across a reference genome.

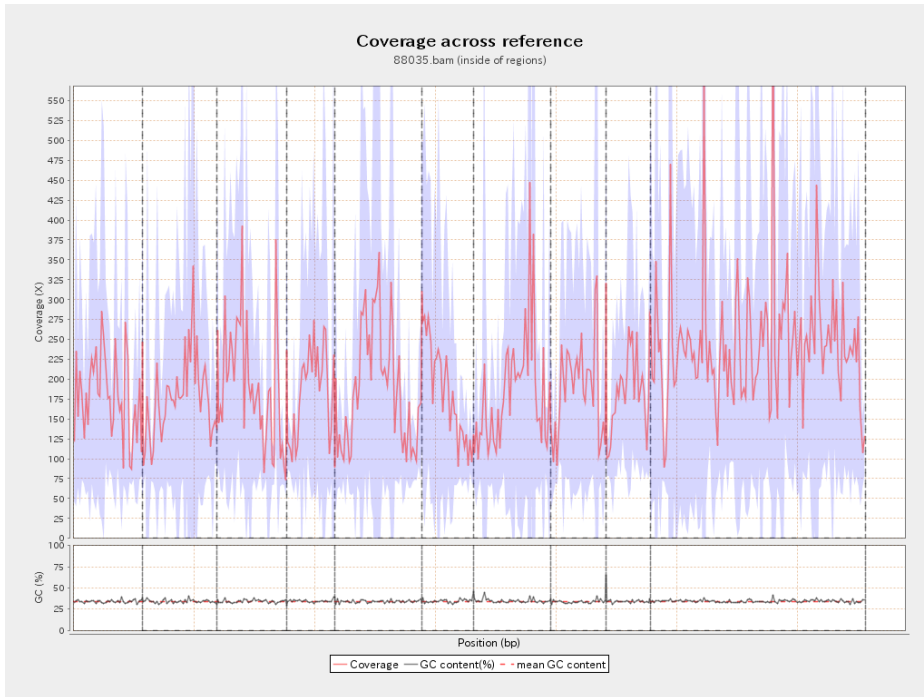

The coverage histogram for the sample Bhutan-88035.

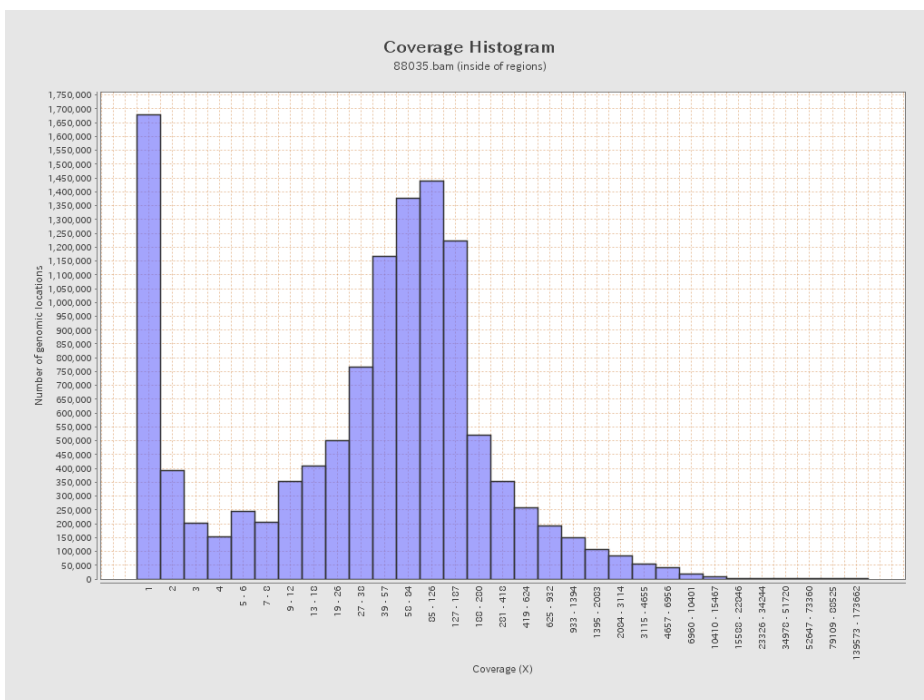

The depth of RAD-seq coverage for the sample Bhutan-88045 across a reference genome.

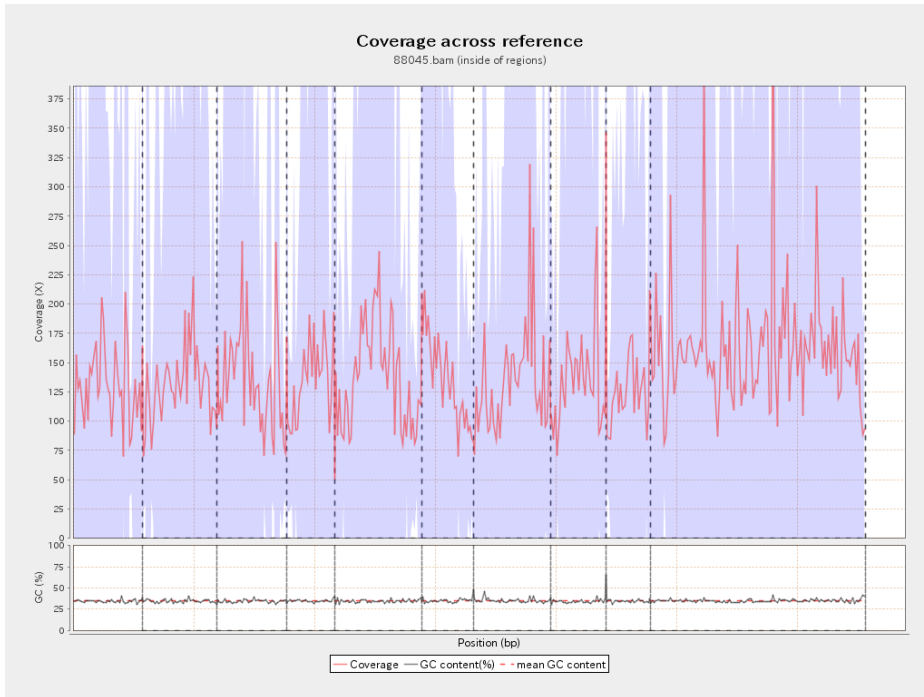

The coverage histogram for the sample Bhutan-88045.

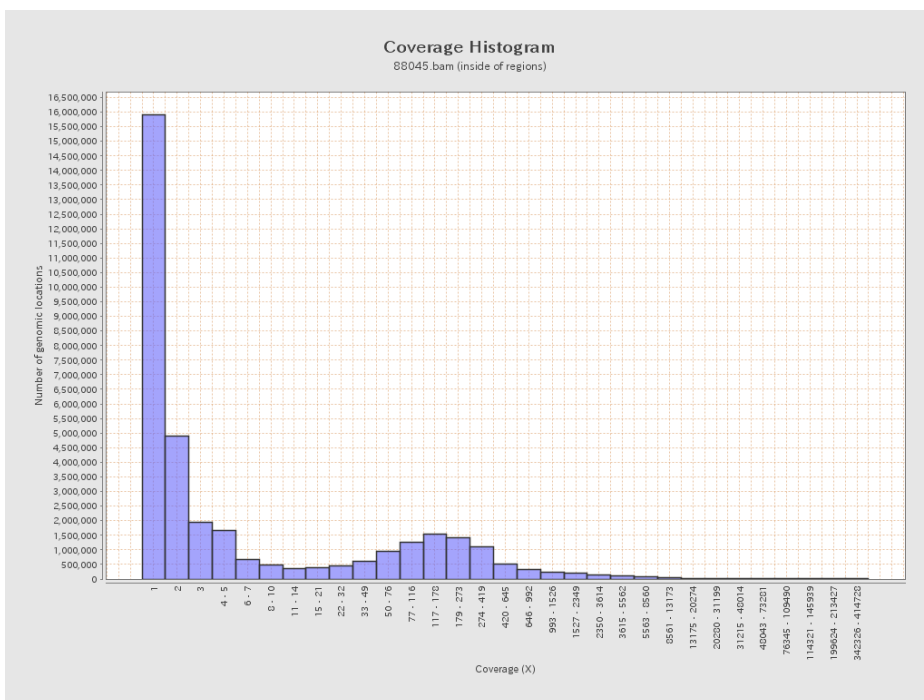

The depth of RAD-seq coverage for the sample Bhutan-88065 across a reference genome.

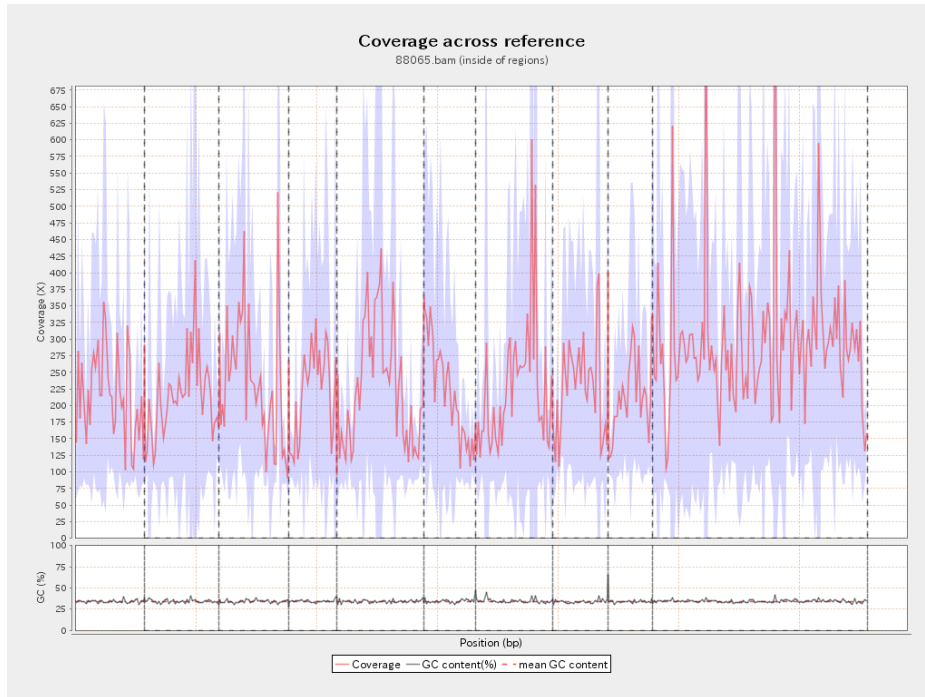

The coverage histogram for the sample Bhutan-88065.

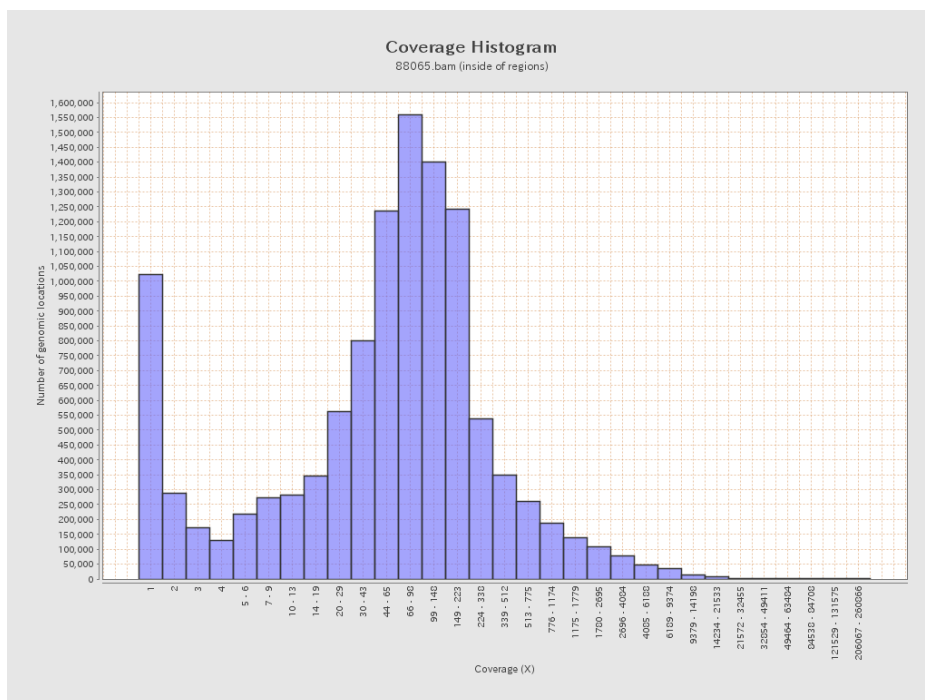

## Supplementary Figure S2.

CLUSTAL 2.1 multiple sequence alignment

```

Bhutan-09015      TGGTYAAGTCCSRYTCRATCATGACKTSWRARYTRRCRCMWTGTRAGSGRYATRSTAGYY 60
Bhutan-09024      TGGTYAAGTCCSRYTCRATCATGACKTSWRARYTRRCRCMWTGTRAGSGRYATRSTAGYY 60
Bhutan-09027      TGGTYAAGTCCSRYTCRATCATGACKTSWRARYTRRCRCMWTGTRAGSGRYATRSTAGYY 60
Bhutan-09030      TGGTYAAGTCCSRYTCRATCATGACKTSWRARYTRRCRCMWTGTRAGSGRYATRSTAGYY 60
Bhutan-09005      YRRAYTTAYCTTCACKSRWTRYGGTKAYAAGWTYGATACACRYARACKGAGYGGWRRCY 60
Indonesia-88035   YRRAYTTAYCTTCACKSRWTRYGGTKAYAAGWTYGAYATAACRYARACKGAGYGGWRRCY 60
Indonesia-88045   YRRAYTTAYCTTCACKSRWTRYGGTKAYAAGWTYGAYATAACRYARACKGAGYGGWRRCY 60
Indonesia-88065   YRRAYTTAYCTTCACKSRWTRYGGTKAYAAGWTYGAYATAACRYARACKGAGYGGWRRCY 60
                  : ::. . . * . * : . . . *

Bhutan-09015      YWTWGYYSRACKGYMATYTYWYKCSRCRAYKAKKAGGMASRTGYCGRRMKATRCARRAG 120
Bhutan-09024      YWTWGYYSRWSKGYMATYTYWYKCSRCRAYKAKKAGGMASRTGYCGRRMKATRCARRAG 120
Bhutan-09027      YWTWGYYSRWSKGYMATYTYWYKCSRCRACGAKKAGGMASRTGYCGRRMKATRCARRAG 120
Bhutan-09030      YWTWGYYSRWSKGYMATYTYWYKCSRCRACGAKKAGGMASRTGYCGRRMKATRCARRAG 120
Bhutan-09005      CTGWCTCCGASGRYMMYYGCTTCGSGGMAWCGMTTTRTACGATKTARRGCGGYRSRARMR 120
Indonesia-88035   CTGWCTCCGASGRYMMYYGCTTCGSGGMAWCGMTTTRTACGAYGTARRGCGGYRSRARMR 120
Indonesia-88045   CTGWCTCCGASGRYMMYYGCTTCGSGGMAWCGMTTTRTACGATKTARRGCGGYRSRARMR 120
Indonesia-88065   CTGWCTCCGASGRYMMYYGCTTCGSGGMAWCGMTTTRTACGAYGTARRGCGGYRSRARMR 120
                  * . . ** * . . . : . . * . * . *

Bhutan-09015      RYRRRGCGGTTTRMTYYGTCWTYRGRKWTTRRYAGTTTCYYSKYSTCRGTSRRMYMY 180
Bhutan-09024      RYRRRGCGGTTTRMTYYGTCWTYRGRKWTTRRYAGTTTCYYSKYSTCRGTSRRMYMY 180
Bhutan-09027      RYRRRGCGGTTTRMTYYGTCWTYRGRKWTTRRYAGTTTCYYSKYSTCRGTSRRMYMY 180
Bhutan-09030      RYRRRGCGGTTTRMTYYGTCWTYRGRKWTTRRYAGTTTCYYSKYSTCRGTSRRMYMY 180
Bhutan-09005      GCGRRTSAARWKGYAACTRCMWWYRKRKATARTARRYRKCGYATCCGCSAMRRYSAGATCT 180
Indonesia-88035   GCGRRTSAARWKGYAACTRCMWWYRKRKATARTARRYRKCGYATCCGCSAMRRYSAGATCT 180
Indonesia-88045   GCGRRTSAARWKGYAACTRCMWWYRKRKATARTARRYRKCGYATCCGCSAMRRYSAGATCT 180
Indonesia-88065   GCGRRTSAARWKGYAACTRCMWWYRKRKATARKARRYRKCGYATCCGCSAMRRYSAGATCT 180
                  ** ... . : * ** . . *** . . * : * *

Bhutan-09015      RAGYMYTGYYGGTARRGAGCYKKCWRYAYYCRWYGTMRATGRYWYGCKGAMTATSARGR 240
Bhutan-09024      RAGYMYTGYYGGTARRGAGCYKKCWRYAYYCRWYGTMRATGRYWYGCKGAMTATSARGR 240
Bhutan-09027      RAGYMYTGYYGGTARRGAGCYKKCWRYAYYCRWYGTMRATGRYWYGCKGAMTATSARGR 240
Bhutan-09030      RAGYMYTGYYGGTARRGAGCYKKCWRYAYYCRWYGTMRATGRYWYGCKGAMTATSARGR 240
Bhutan-09005      ARRCACWRYTARKRRGCGTAYKGTGTGCTTMAWYKCGGWWRGWCWYRYKARCYRKCKWACR 240
Indonesia-88035   ARRCACWRYTARKRRGCGTAYKGTGTGCTTMAWYKCGGWWRGWCWYRYKAACYRKCKWACR 240
Indonesia-88045   ARRCAYWRYTARKRRGCGTAYKGTGTGCTTMAWYKCGGWWRGWCWYRYKARCYRKCKWACR 240
Indonesia-88065   ARRCACWRYTARKRRGCGTAYKGTGTGCTTMAWYKCGGWWRGWCWYRYKARCYRKCKWACR 240
                  * . . * . . ** . . ** ** * . . *

Bhutan-09015      CMYGGYKWCYCGAAARTCYWARTAACKGAYRYTTRRAAYWYRKSRCGYRTRCRKWRKKAY 300
Bhutan-09024      CCTGGYKWCYCGAAARTCYWARTAACKGAYRYTTRRAAYWYRKSRCGYRTRCRKWRKKAT 300
Bhutan-09027      CMYGGYKWCYCGAAARTCYWARTAACKGAYRYTTRRAAYWYRKSRCGYRTRCRGTRKKAY 300
Bhutan-09030      CMYGGYKWCYCGAAARTCYWARTAACKGAYRYTTRRAAYWYRKSRCGYRTRCRGTRKKAY 300
Bhutan-09005      MCTRSYKATCGCGWAWATWRCMGMGTKRYRYYYGRRTTWCAAKCAYRRTTWGSRTAATTCT 300
Indonesia-88035   MCTRSYKATCRCGWAWATWRCMGMGTKRYRYYYGRRTTWCAAKCAYRRTTWGSRTAATTCT 300
Indonesia-88045   MCTRSYKATMCGCGWAWATWRCMGMGTKRYRYYYGRRTTWCAAKCAYRRTTWGSRTAATTCT 300
Indonesia-88065   MCTRSYKATCGCGWAWATWRCMGMGTKRYRYYYGRRTTWCAAKCAYRRTTWGSRTAATTCT 300

```

```

      .** .. . * * . *** * : * * . * ..
Bhutan-09015   TSRWCTGWWTTTRTGCRTWRRTCATASWWTAYSRYMKRRGMRYCGYGRMAAWAGRSGRKY 360
Bhutan-09024   TSRWCTGWWTTTRTGCRTWRRTCATASWWTAYSRYMKRRGMRYCGYGRMAAWAGRSGRKY 360
Bhutan-09027   TSRWCTGWWTTTRTGCRTWRRTCATASWWTAYSRYMKRRGMRYCGYGRMAAWAGRSGRKY 360
Bhutan-09030   TSRWCTGWWTTTRTGCRTWRRTCATASWWTAYSRYMKRRGMRYCGYGRMAAWAGRSGRKY 360
Bhutan-09005   YMRWTKTWWWYKGCYRYGYTARKGGYWSAWYMTCRYMTRRAAGCMRTRRAWRARRRSRAKY 360
Indonesia-88035 TMRWYKTWWWYKGCYRYGYTARKGGYWSAWYMTCRYMTRRAAGCMRTRRATRARRRSRAKY 360
Indonesia-88045 YMRWYKTWWACKGCYRYGYTARKGGYWSAWYMTCRYMTRRAAGCMRTRRATRARRRSRAKY 360
Indonesia-88065 TMRWYKTWWWYKGCYRYGYTARKGGYWSAWYMTCRYMTRRAAGCMRTRRATRARRRSRAKY 360
      ** . ** . * . * * .***.** * ** **
Bhutan-09015   RMSMRYRRSGARYKYRYTCATYTGAWRCGAYARAYGAAGWGGTGGCTRRRYRYCGRWRTA 420
Bhutan-09024   RMSMRYRRSGARYKYRYTCATYTGAWRCGAYARAYGAAGWGGTGGCTRRRYRYCGRWRTA 420
Bhutan-09027   RMSMRYRRSGARYKYRYTCATYTGAWRCGAYARAYGAAGWGGTGGCTRRRYRYCGRWRTA 420
Bhutan-09030   RMSMRYRRSGARYKYRYTCATYTGAWRCGAYARAYGAAGWGGTGGCTRRRYRYCGRWRTA 420
Bhutan-09005   RASMGCARSRMGCYRYGMWYYGCRWACRRCRARYKRMKWSRTGKSKRGAYATTAAAKR 420
Indonesia-88035 RASMGCARSRMGCYRYGMWYYGCRWRYRRCRARYKRMKWSRTTKSKRGAYATTAAAKR 420
Indonesia-88045 RASMGCARSRMGCYRYGMWYYGCRWRYRRCRARYKRMKWSRATKSKRGAYATTAAAKR 420
Indonesia-88065 RASMGCARSRMGCYRYGMWYTGCRWACRRCRARYKRMKWSRWAKSKRGAYATTAAAKR 420
      * ** * * .*** * * * . ** * . .
Bhutan-09015   AGTCGYRYRGRKKYMRKTWSKRYRWWRWTYRMRYTAWRYRCTGGACTYKRWKCCYAAAR 480
Bhutan-09024   AGTCGYRYRGRKKYMRKTWSKRYRWWRWTYRMRYTAWRYRCTGGACTYKRWKCCYAAAR 480
Bhutan-09027   AGTCGYRYRGRKKYMRKTWSKRYRWWRWTYRMRYTAWRYRCTGGACTYKRWKCCYAAAR 480
Bhutan-09030   AGTCGYRYRGRKKYMRKTWSKRYRWWRWTYRMRYTAWRYRCTGGACTYKRWKCCYAAAR 480
Bhutan-09005   MAYYRTACGRAGGCMGGYTGTTRYRAWRTKTACGCWRWGYYRWRRSYYKRATGTATYGGW 480
Indonesia-88035 MAYTATACGRAGGCMGGYTGTTRYRAWRTKTACGCWRWGYYRWRRSYYKRATGTATYGGW 480
Indonesia-88045 MAYTATACGRAGGCMGGYTGTTRYRAWRTKTACGCWRWGYYRWRRSYYKRATGTATYGGW 480
Indonesia-88065 MAYYRTACGRAGGCMGGYTGTTRYRAWRTKTACGCWRWGYYRWRRSYYKRATGTATYGGW 480
      . * ..*** ** . * ** . *** .. *.
Bhutan-09015   TGGGYCYTYWYTTWGRAWAGRKWYCGTGWGMRSAGCYSCRGGGYTTGRWKAWYRGTCCYS 540
Bhutan-09024   TGGGYCYTYWYTTWGRAWAGRKWYCGTGWGMRSAGCYSCRGGGYTTGRWKAWYRGTCCYS 540
Bhutan-09027   TGGGYCYTYWYTTWGRAWAGRKWYCGTGWGMRSAGCYSCRGGGYTTGRWKAWYRGTCCYS 540
Bhutan-09030   TGGGYCYTYWYTTWGRAWAGRKWYCGTGWGMRSAGCYSCRGGGYTTGRWKAWYRGTCCYS 540
Bhutan-09005   CTRKCTGATACAWWRRCTTRGGTTCYSYATAAASRRTYCYRRRKYTYRATGWYRYYCC 540
Indonesia-88035 CTRKCTGATACAWWRRCTTRGGTTCYSYATAAASRRTYCYRRRKYTYRATGWYRYYCC 540
Indonesia-88045 CTRKCTGATACAWWRRCTTRGGTTCYSYATAAASRRTYCYRRRKYTYRATGWYRYYCC 540
Indonesia-88065 CTRKCTGATACAWWRRCTTRGGTTCYSYATAAASRRTYCYRRRKYTYRATGWYRYYCC 540
      : : * * . : . . * * * * * *** .
Bhutan-09015   MRARKACCATCYAYWCGTTARTYAYAWGAYRAYARYYWRMYRRTYCACYTTTGAWCYYA 600
Bhutan-09024   MRARKACCATCYAYWCGTTARTYAYAWGAYRAYARYYWRMYRRTYCACYTTTGAWCYYA 600
Bhutan-09027   MRARKACCATCYAYWCGTTARTYAYAWGAYRAYARYYWRMYRRTYCRCTTTGAWCYYA 600
Bhutan-09030   MRARKACCATCYAYWCGTTARTYAYAWGAYRAYARYYWRMYRRTYCACYTTTGAWCYYA 600
Bhutan-09005   MRRGTTTTTGYCCYWRKYRYYTRCRRTRYRACCRYYTTGATTRWYRYYCCAGWYCCR 600
Indonesia-88035 MRRGTTTTTGYCCYWRKYRYYTRCRRTRYRACCRYYTTGATTRWYRYYCCAGWYCCR 600
Indonesia-88045 MRRGTTTTTGYCCYWRKYRYYTRCRRTRYRACCRYYTTGATTRTYRYYCCAGWYCCR 600
Indonesia-88065 MRRGTTTTTGYCCYWRKYRYYTRCRRTRYRACCRYYTTGATTRWYRYYCCAGWYCCR 600
      ** . : . .** . * ** .** * * * ..*
Bhutan-09015   YRRSYKTYRWTWAGWTYRSTGWKTYCGRWCTKAYATRATWRTTSTKYTYKYRTRSTRGYC 660
Bhutan-09024   YRRSYKTYRWTWAGWTYRSTGWKTYCGRWCTKAYATRATWRTTSTKYTYKYRTRSTRGYC 660

```

Bhutan-09027 YRRSYKTYRWTWAGWTYASTGWKTYTCGRWCTKAYATRATWRTTSTKYTYKYRTRSTRGYC 660  
 Bhutan-09030 YRRSYKTYRWTWAGWTYRSTGWKTYTCGRWYWKAYATRATWRTTSTKYTYKYRTRSTRGYC 660  
 Bhutan-09005 TAGGCAYYRWYTMATCCASKSTKYWYSRTYTKGYRKRTWWGYWGYKYTTTTRWACYMAYS 660  
 Indonesia-88035 TAGGCAYYRWYTMATCCASKSTKYWYSRTCTKGYRKRTWWGYWGYKYTTTTRWACYMAYS 660  
 Indonesia-88045 TAGGCAYYAAYTMATCCASKSTKYWYSRTCTKGYRKRTWWGYWGYKYTTTTRWACYMAYS 660  
 Indonesia-88065 TAGGCAYYRWYTMATCCASKSTKYWYSRTCTKGYRKRTWWGYWGYKYTTTTRWACYMAYS 660  
 . \* . \*.. \*\* .\* \*. \* .\*: \* . \*\* . \* . \*..

Bhutan-09015 WYRSYRAGRYTYYYWCMGRYRWSCKCYRRCRWYATKAMKRYTRRRRCMMGMSWTWWR 720  
 Bhutan-09024 WYRSYRAGRYTYYYWCMGRYRWSCKCYRRCRWYATKAMKRYTRRRRCMMGMSWKWWR 720  
 Bhutan-09027 WYRSYRAGRYTYYYWCMGRYRWSCKCYRRCRWYATKAMKRYTRRRRCMMGMSWKWWR 720  
 Bhutan-09030 WYRSYRAGRYTYYYWCMGRYRWSCKCYRRCRWYATKAMTRYTRRRRCMMGMSWTWWR 720  
 Bhutan-09005 TYGCTGWSGTCTTASCYRAGTWGATTGYTGGYAWTYKYKMCKAYKGRGGMCARAGAKAWG 720  
 Indonesia-88035 TYGCTGWSGTCTTASCYRAGTWGATTGYTGGYAWTYKYKMCKAYKGRGGMCARAGATAWG 720  
 Indonesia-88045 TYGCTGWSGTCTTASCYRAGTWGATTGYTGGYAWTYKYKMCKAYKGRGGMCARAGATAWG 720  
 Indonesia-88065 TYGCTGWSGTCTTASCYRAGTWGATTGYTGGYAWTYKYKMCKAYKGRGGMCARAGATAWG 720  
 \* . . . \*.. . \* \* \* \* . \* . \* . . \*

Bhutan-09015 WSSTYYTTRCARRYRRMCYAGAWRCYRTRWWTMCKTTYWYAYGAAWRYWKRSCCKTR 780  
 Bhutan-09024 WCSTYYTTRCARRYRRMCYAGAWRCYRTRWWTMCKTTYWYAYGAAWRYWKRSCCKTR 780  
 Bhutan-09027 WSSTYYTTRCARRYRRMCYAGAWRCYRTRWWTMCKTTYWYAYGAAWRYWKRSCCKTR 780  
 Bhutan-09030 WCSTYYTTRCARRYRRMCYAGAWRCYRTRWWTMCKTTYWYAYGAAWRYWKRSCCKTR 780  
 Bhutan-09005 WCCWCCYWAYWRATGAAMYRRTTAMYRKATTYCYGYCCACTGYGAATGTWTAGCGTKYR 780  
 Indonesia-88035 WCCWCCYWAYWRATGAAMYRRTTAMYRKATTYCYGYCCACTGYGAATGTWTAGCGTKYR 780  
 Indonesia-88045 WCCWCCYWAYWRATGAAMYRRTTAMYRKATTYCYGYCCACTGYGAATGTWTAGYKTKYR 780  
 Indonesia-88065 WCCWCCYWAYWRATGAAMYRRTTAMYRKATTYCYGYCCACTGYRRWTGTWTAGCGTKYR 780  
 \*.. \* \* : \*\* . \* \* . \* \*

Bhutan-09015 ACYRSTTMRRRARAWTYKWWTYRKSRYRTAAKYAWRGCRCKMKRAWGCTYSGRWWGCC 840  
 Bhutan-09024 ACYRSTTMRRRARAWTYKWWTYRKSRYRTAAKYAWRGCRCKMKRAWGCTYSGRWWGCC 840  
 Bhutan-09027 ACYRSTTMRRRARAWTYKWWTYRKSRYRTAAKYAWRGCRCKMKRAWGCTYSGRWWGCC 840  
 Bhutan-09030 ACYRSTTMRRRARAWTYKWWTYRKSRYRTAAKYAWRGCRCKMKRAWGCTYSGRWWGCC 840  
 Bhutan-09005 RYCRGAAAAGAWRWAWCKAAYYAKGCRTRYWRTTGARRMGTMTAGWATYCGRGRWTKYM 840  
 Indonesia-88035 RYCRGAAAAGAWRWAWCKAAYYAKGCRTRYWRTTGARRMGTMTAGWATYCGRGRWTKYM 840  
 Indonesia-88045 RYCRGAAAAGAWRWAWCKAAYYAKGCRTRYWRTTGARRMGTMTAGWATYCGRGRWTKYM 840  
 Indonesia-88065 RYCRGAAAAGAWRWAWCKAAYYAKGCRTRYWRTTGARRMGTMTAGWATYCGRGRWTKYM 840  
 \*.: : \* \* \* \* . \* \* . \* . \*

Bhutan-09015 YGYCTMTRGGTRRSAGRYCCACCATYWMCTGRTTTRAYYGTAMYTYGCRYGGKAARCSRW 900  
 Bhutan-09024 YGYCTMTRGGTRRSAGRYCCACCATYWMCTGRTTTRAYYGTAMYTYGCRYGGKAARCSRW 900  
 Bhutan-09027 YGYCTMTRGGTRRSAGRYCYWCCATYWMCTGRTTTRAYYGTAMYTYGCRYGGKAARCSRW 900  
 Bhutan-09030 YGYCTMTRGGTRRSAGRYCCWCCATYWMCKGRTTTRAYYGTAMYTYGCRYGGKAARCSRW 900  
 Bhutan-09005 YRTMYCYARRCGASGRRYSCAAAWYTTCTYTKRYGGRYAYRAYYYYSYTARRKRWRYYCAA 900  
 Indonesia-88035 YRTMYCYARRCGASGRRYSCAAAWYTTCTYTKRYGGRYAYRAYYYYSYTARRKRWRYYCAA 900  
 Indonesia-88045 YRTMYCYARRCGASGRRYSCAAAWYTTCTYTKRYGGRYAYRAYYYYSYTARRKRWRYYCAA 900  
 Indonesia-88065 YRTMYCYARRCGASGRRYSCAAATCTCTYTKRYGGRYAYRAYYYYSYTARRKRWRYYCAA 900  
 \* \*.. \*\* . . . \*\* . \* \*\* . \* \* .

Bhutan-09015 MTRGAKRWWAAARWWTKYAYACCACKCRATARMYWWGTTRRSKTYRRCYWRGAGYRYRC 960  
 Bhutan-09024 MTRGAKRWWAAARWWTKYAYACCACKCRATARMYWWGTTRRSKTYRRCYWRGAGYRYRC 960  
 Bhutan-09027 MTRGAKRWWAAARWWTKYAYACCACKCRATARMYWWGTTRRSKTYRRCYWRGAGYRYRC 960  
 Bhutan-09030 MTRGAKRWWAAARWWTKYAYACCACKCRATARMYWWGTTRRSKTYRRCYWRGAGYRYRC 960  
 Bhutan-09005 CRRRKAATAGRTATAYTYGTGTTWCKCACCMGCCWKKYRRSTWYRGYSWRRWSCRYYAY 960  
 Indonesia-88035 CRRRKAATAGRTATAYTYGTGTTWCKYRCCMGCCWKKYRRSTWYRGYSWRRWSCRYYAY 960



Indonesia-88045 CRRRKAATAGRTATAYTYGTGTTWYKYRCCMGCCWKKYRRSTWYRGYSWRRWSCRYAY 960  
Indonesia-88065 CRRRKAATAGRTATAYTYGTGTTWYKYRCCMGCCWKKYRRSTWYRGYSWRRWSCRYAY 960  
\* \* . : . \* . \*\* \*\*\* . \*\* \* . \*\*

Bhutan-09015 MYWMYMYRRRTSGAGCYAGCGAAAWSYGARASGGKGARCYASWTCRAMYTYWMMKGRGRC 1020  
Bhutan-09024 MYWMYMYRRRTSGAGCYAGCGAAAWSYGARASGGKGARCYASWTCRAMYTYWMMKGRGRC 1020  
Bhutan-09027 MYWMYMYRRRTSGAGCYAGCGAAAWSYGARASGGKGARCYASWTCRAMYTYWMMKGRGRC 1020  
Bhutan-09030 MYWMYMYRRRTSGAGCYAGCGAAAWSYGARASGGKGARCYASWTCRAMYTYWMMKGRGRC 1020  
Bhutan-09005 MYACCACAGYCRWRMTRRMSWWRTRSCRRAMGRKTAWGMYCSTKYARCCYCTATRMARRM 1020  
Indonesia-88035 MYACCACAGYCRWRMTRRMSWWRTRSCRRAMGRKTAWGMYCSTKYARCCYCTATRMARRM 1020  
Indonesia-88045 MYACCACAGYCRWRMTRRMSWWRTRSCRRAMGRKTAWGMYCSTKYARCCYCTATRMARRM 1020  
Indonesia-88065 MYACCACAGYCRWRMTRRMSWWRTRSCRRAMGRKTAWGMYCSTKYARCCYCTATRMARRM 1020  
\*\* . \* . . \* . . . \* . \*

Bhutan-09015 ATARAYKYAYYCTGRCYKYKTSWSRATYYATTSMRAYAACYRRTTCYMYTCTATRMYSAR 1080  
Bhutan-09024 ATARAYKYAYYCTGRCYKYKTSWSRATYYATTSMRAYAACYRRTTCYMYTCTATRMYSAR 1080  
Bhutan-09027 ATARAYKYAYYCTGRCYKYKTSWSRATYYATTSMRAYAACYRRTTCYMYTCTATRMYSAR 1080  
Bhutan-09030 ATARAYKYAYYCTGRCYKYKTSWSRATYYATTSMRAYAACYRRTTCYMYTCTATRMYSAR 1080  
Bhutan-09005 GYRGGCTTCMYMYRRTYKTKYCWCRGCYTMWCCRWTTWYRWMYMYCSWYAMCGSTR 1080  
Indonesia-88035 GYRGGCTTCMYMYRRTYKTKYCWCRGCYTMWCCRWTTWYRWMYMYCSWYAMCGSTR 1080  
Indonesia-88045 GYRGGCTTCMYMYRRTYKTKYCWCRGCYTMWCCRWTTWYRWMYMYCSWYAMCGSTR 1080  
Indonesia-88065 GYRGGCTTCMYMYRRTYKTKYCWCRGCYTMWCCRWTTWYRWMYMYCSWYAMCGSTR 1080  
. . \* \* \* \* . \* . \* . \* : \*\* \* . . \* \* : \*

Bhutan-09015 YCYARYKWKGRKARWACRRCARWTTYAAYTAYAGYRRTTGCTGYTTRARGACKSGGWRA 1140  
Bhutan-09024 YCYARYKWKGRKARWACRRCARWTTYAAYTAYAGYRRTTGCTGYTTRARGACKSGGWRA 1140  
Bhutan-09027 YCYARYKWKGRKARWACRRCARWTTYAAYTAYAGYRRTTGCTGYTTRARGACKSGGWRA 1140  
Bhutan-09030 YCYARYKWKGRKARWACRRCARWTTYAAYTAYAGYRRTTGCTGYTTRARGACKSGGWRA 1140  
Bhutan-09005 TYTWGCSTKSYRKAWRTAGYGRYKTRRYWMCRRTRYRTRWRTYGGGARAGRCRRWG 1140  
Indonesia-88035 TYTWGCSTKSYRKAWRTAGYGRYKTRRYWMCRRTRYRTRWRTYGGGARAGRCRRWG 1140  
Indonesia-88045 TYTWGCSTKSYRKAWRTAGYGRYKTRRYWMCRRTRYRTRWRTYGGGARAGRCRRWG 1140  
Indonesia-88065 TYTWGCSTKSYRKAWRTAGYGRYKTRRYWMCRRTRYRTRWRTYGGGARAGRCRRWG 1140  
\* . \*\* \* . \* . \* . . . . \*

Bhutan-09015 TCGMSYWRAGGAGGAYYWCYARTRWRRAYMMWMMKWWARGYTYWARRMWGCKRRYCYCTR 1200  
Bhutan-09024 TCGMSYWRAGGAGGAYYWCYARTRWRRAYMMWMMKWWARGYTYWARRMWGCKRRYCYCTR 1200  
Bhutan-09027 TCGMSYWRAGGAGGAYYWCYARTRWRRAYMMWMMKWWARGYTYWARRMWGCKRRYCYCTR 1200  
Bhutan-09030 TCGMSYWRAGGAGGAYYWCYARTRWRRAYMMWMMKWWARGYTYWARRMWGCKRRYCYCTR 1200  
Bhutan-09005 CYCASTWAGRRGRCRYCWYMYRKRKWRWCMMACTWTARGGCWCARAGMAATTGRITCAG 1200  
Indonesia-88035 CYCASTWAGRRGRCRYCWYMYRKRKWRWCMMACTWTARGGCWCARAGMAATTGRITCAG 1200  
Indonesia-88045 CYCASTWAGRRGRCRYCWYMYRKRKWRWCMMACTWTARGGCWCARAGMAATTGRITCAG 1200  
Indonesia-88065 CYCASTWAGRRGRCRYCWYMYRKRKWRWCMMACTWTARGGCWCARAGMAATTGRITCAG 1200  
\* \* . \* \* \* \* . \* . \* . . \* :

Bhutan-09015 TWYCRAGCWCRCRYAGCWAYATWRRRGRYWCACAYCARGCYCARGMRRYAYAGMRWAAA 1260  
Bhutan-09024 TWYCRAGCWCRCRYAGCWAYATWRRRGRYWCACAYCARGCYCARGMRRYAYAGMRWAAA 1260  
Bhutan-09027 TWYCRAGCWCRCRYAGCWAYATWRRRGRYWCACAYCARGCYCARGMRRYAYAGMRWAAA 1260  
Bhutan-09030 TWYCRAGCWCRCRYAGCWAYATWRRRGRYWCACAYCARGCYCARGMRRYAYAGMRWAAA 1260  
Bhutan-09005 CAYSARATWYARTGYGAYTCRYWGGRRRTCWMMTTYRGTAYSRRRMRGRCRCRCGWARR 1260  
Indonesia-88035 CAYSARATWYARTGYGAYTCRYWGGRRRTCWMMTTYRGTAYSRRRMRGRCRCRCGWARR 1260  
Indonesia-88045 CAYSARATWYARTGYGAYTCRYWGGRRRTCWMMTTYRGTAYSRRRMRGRCRCRCGWARR 1260  
Indonesia-88065 CAYSARATWYARTGYGAYTCRYWGGRRRTCWMMTTYRGTAYSRRRMRGRCRCRCGWARR 1260  
\* . . \* \* . . \* \* \* : \* \* . \* \* \*

|                 |                                                                |      |
|-----------------|----------------------------------------------------------------|------|
| Bhutan-09015    | TTYRTCYCKAKTGTAAKTCRTAGRAMSRRGATKKMATCYSWCWGYCTSKMGRWRMTGRKM   | 1320 |
| Bhutan-09024    | TTYRTCYCKAKTGTAAKTCRTAGRAMSRRGATKKMATCYSWCWGYCTSKMGRWRMTGRKM   | 1320 |
| Bhutan-09027    | TTYRTCYCKAKTGTAAKTCRTAGRAMSRRGATKKMATCYSWCWGYCTSKMGRWRMTGRKM   | 1320 |
| Bhutan-09030    | TTYRTCYCKAKTGTAAKTCRTAGRAMSRRGATKKMATCYSWCWGYCTSKMGRWRMTGRKM   | 1320 |
| Bhutan-09005    | ACYRWYCSGCTWSYRRGYTAYWKATMGGAAARGTKAWYYYSMAGSTYCCTCTGTAYCRAGA  | 1320 |
| Indonesia-88035 | ACYRWYCSGCTWSYRRGYTAYWKATMGGAAARGTKAWYYYSMAGSTYCCTCTGTAYCRAGA  | 1320 |
| Indonesia-88045 | ACYRWYCSGCTWSYRRGYTAYWKATMGGAAARGTKAWYYYSMAGSTYCCTCTGTAYCRAGA  | 1320 |
| Indonesia-88065 | ACYRWYCSGCTWSYRRGYTAYWKATMGGAAARGTKAWYYYSMAGSTYCCTCTGTAYCRAGA  | 1320 |
|                 | : ** . . . . :*. . .* ** . . .                                 |      |
| Bhutan-09015    | TTTCTGAAMTGAYWSRYCMTSRRYYAAMRGCYRMTMTMWGRMMYAANKAATRRKYRKT     | 1380 |
| Bhutan-09024    | TTTCTGAAMTGAYWSRYCMTSRRYYAAMRGCYRMTMTMWGRMMYAANKAATRRKYRKT     | 1380 |
| Bhutan-09027    | TTTCTGAAMTGAYWSRYCMTSRRYYAAMRGCYRMTMTMWGRMMYAANKAATRRKYRKT     | 1380 |
| Bhutan-09030    | TTTCTGAAMTGAYWSRYCMTSRRYYAAMRGCYRMTMTMWGRMMYAANKAATRRKYRKT     | 1380 |
| Bhutan-09005    | YKYYGRWTMYRRTYWCRTYACYSGGYTRGMAATKTAWAWAWRRRCMYRATGRMWGATCCRTW | 1380 |
| Indonesia-88035 | YKYYGRWTMYRRTYWCRTYACYSGGYTRGMAATKTAWAWAWRRRCMYRATGRMWGATCCRTW | 1380 |
| Indonesia-88045 | YKYYGRWTMYRRTYWCRTYACYSGGYTRGMAATKTAWAWAWRRRCMYRATGRMWGATCCRTW | 1380 |
| Indonesia-88065 | YKYYGRWTMYRRTYWCRTYACYSGGYTRGMAATKTAWAWAWRRRCMYRATGRMWGATCCRTW | 1380 |
|                 | . :* :*. * * * . * . * * * . *                                 |      |
| Bhutan-09015    | RWARTTAKWRRYRWRYWYRRCYRACYGTTTGAARRCKKKMRYRACGCATRRYAKYM       | 1440 |
| Bhutan-09024    | RWARTTAKWRRYRWRYWYRRCYRACYGTTTGAARRCKKKMRYRACGCATRRYAKYM       | 1440 |
| Bhutan-09027    | RWARTTAKWRRYRWRYWYRRCYRACYGTTTGAARRCKKKMRYRACGCATRRYAKYM       | 1440 |
| Bhutan-09030    | RWARTTAKWRRYRWRYWYRRCYRACYGTTTGAARRCKKKMRYRACGCATRRYAKYM       | 1440 |
| Bhutan-09005    | ATWRWGWRWRRRCRAARYWYRATMYGMTCKYYMKRRGGTKKGMACGRYRQWKARYGKCC    | 1440 |
| Indonesia-88035 | ATWRWGWRWRRRCRAARYWYRATMYGMTCKYYMKRRGGTKKGMACGRYRQWKARYGKCC    | 1440 |
| Indonesia-88045 | ATWRWGWRWRRRCRAARYWYRATMYGMTCKYYMKRRGGTKKGMACGRYRQWKARYGKCC    | 1440 |
| Indonesia-88065 | ATWRWGWRWRRRCRAARYWYRATMYGMTCKYYMKRRGGTKKGMACGRYRQWKARYGKCC    | 1440 |
|                 | * .*** * ***** * * . * . **.*                                  |      |
| Bhutan-09015    | ARTRAAAMYRWRGWMYGYATYRYYRCRYSWRGTRMWCCKAGRSYCKTRKYTGRRWGAC     | 1500 |
| Bhutan-09024    | ARTRAAAMYRWRGWMYGYATYRYYRCRYSWRGTRMWCCKAGRSYCKTRKYTGRRWGAC     | 1500 |
| Bhutan-09027    | ARTRAAAMYRWRGWMYGYATYRYYRCRYSWRGTRMWCCKAGRSYCKTRKYTGRRWGAC     | 1500 |
| Bhutan-09030    | ARTRAAAMYRWRGWMYGYATYRYYRCRYSWRGTRMWCCKAGRSYCKTRKYTGRRWGAC     | 1500 |
| Bhutan-09005    | RRKGCGMYCYRWSACRCYMKYRGGYTMCGTGKCRCTYCYTMRGCTYTYRGCCKMARKRA    | 1500 |
| Indonesia-88035 | RRKGCGMYCYRWSACRCYMKYRGGYTMCGTGKCRCTYCYTMRGCTYTYRGCCKMARKRA    | 1500 |
| Indonesia-88045 | RRKGCGMYCYRWSACRCYMKYRGGYTMCGTGKCRCTYCYTMRGCTYTYRGCCKMARKRA    | 1500 |
| Indonesia-88065 | RRKGCGMYCYRWSACRCYMKYRGGYTMCGTGKCRCTYCYTMRGCTYTYRGCCKMARKRA    | 1500 |
|                 | *. .** ***. * .** * . * . . * .                                |      |
| Bhutan-09015    | TKRRGTCAYSRRWKYCKMYARAWRGRKRAYTYYAMYWRYKYRYRYTYCYTCTYTGRMMG    | 1560 |
| Bhutan-09024    | TKRRGTCAYSRRWKYCKMYARAWRGRKRAYTYYAMYWRYKYRYRYTYCYTCTYTGRMMG    | 1560 |
| Bhutan-09027    | TKRRGTCAYSRRWKYCKMYARAWRGRKRAYTYYAMYWRYKYRYRYTYCYTCTYTGRMMG    | 1560 |
| Bhutan-09030    | TKRRGTCAYSRRWKYCKMYARAWRGRKRAYTYYAMYWRYKYRYRYTYCYTCTYTGRMMG    | 1560 |
| Bhutan-09005    | WKAARYMYMAARGYYTMYMRRAGKATRWTATCCCYTRCKYAYTGTWYCTWYKYYKAMCK    | 1560 |
| Indonesia-88035 | WKAARYMYMAARGYYTMYMRRAGKATRWTATCCCYTRCKYAYTGTWYCTWYKYYKAMCK    | 1560 |
| Indonesia-88045 | WKAARYMYMAARGYYTMYMRRAGKATRWTATCCCYTRCKYAYTGTWYCTWYKYYKAMCK    | 1560 |
| Indonesia-88065 | WKAARYMYMAARGYYTMYMRRAGKATRWTATCCCYTRCKYAYTGTWYCTWYKYYKAMCK    | 1560 |
|                 | * * * * .** * . * : . * * * * . * *                            |      |
| Bhutan-09015    | MARGWCCWTGRCYGTGATYTYGGWRSSGKACYTWYRRKYCCMGYRRTYGRITTTAATGTA   | 1620 |
| Bhutan-09024    | MARGWCCWTGRCYGTGATYTYGGWRSSGKACYTWYRRKYCCMGYRRTYGRITTTAATGTA   | 1620 |
| Bhutan-09027    | MARGWCCWTGRCYGTGATYTYGGWRSSGKACYTWYRRKYCCMGYRRTYGRITTTAATGTA   | 1620 |
| Bhutan-09030    | MARGWCCWTGRCYGTGATYTYGGWRSSGKACYTWYRRKYCCMGYRRTYGRITTTAATGTA   | 1620 |

Bhutan-09005 CMATWWYTYCAYRCATRYKYTSKTGSGRGMYYWWTAGKCYWWRGCRYTARCGCGRYAGW 1620  
Indonesia-88035 CMATWWYTYCAYRCATRYGYTSKTGSGRGMYYWWTAGKCYWWRGCRYTARCGCGRYAGW 1620  
Indonesia-88045 CMATWWYTYCAYRCATRTTYTSKTGSGRGMYYWWTAGKCYWWRGCRYTARCGCGRYAGW 1620  
Indonesia-88065 CMATWWYTYCAYRCATRYKYTSKTGSGRGMYYWWTAGKCYWWRGCRYTARCGCGRYAGW 1620  
\* \* : . \* \* \* \* . \* . .

Bhutan-09015 RWTCRYWTCYCSWRYAACRASWYKWTRRYTYATTRAGGAYCRRCYCYRWGYGTGCY MAY 1680  
Bhutan-09024 RWTCRYWTCYCSWRYAACRASWYKWTRRYTYATTRAGGAYCAACYCYRWGYGTGCY MAY 1680  
Bhutan-09027 RWTCRYWTCYCSWRYAACRASWYKWTRRYTYATTRAGGAYCRRCYCYRTGYGTGCY MAY 1680  
Bhutan-09030 RWTCRYWTCYCSWRYAACRASWYKWTRRYTYATTRAGGAYCAACYCYRWGYGTGCY MAY 1680  
Bhutan-09005 ATYYGTWWSCTSWACYRRMAWGCKAYRGTKYRAGARKRWCYAACTTGAKYAYKYMMY 1680  
Indonesia-88035 ATYYGTWWSCTSWACTGGMAWGCKAYRGTKYRAGARKRWCYAACTTGAKYAYKYMMY 1680  
Indonesia-88045 ATYYGTWWSCTSWACYRRMAWGCKAYRGTKYRAGARKRWCYAACTTGAKYATGYMMY 1680  
Indonesia-88065 ATYYGTWWSCTSWACYRRMAWGCKAYRGTKYRAGARKRWCYAACTTGAKYAYKYMMY 1680  
\* . \* \* . \* \* \* . \* : . \* . \* \* \*

Bhutan-09015 MRRRWRAKRWYTYMCTTGAWWYSCYCATYARYARYRRYAYKRGRWYAGMAYRKT CWYAG 1740  
Bhutan-09024 MRRRWRAKRWYTYMCTTGAWWYSCYCATYARYARYRRYACTRGRWYAGMAYRKT CWYAG 1740  
Bhutan-09027 MRRRWRAKRWYTYMCTTGATATSCYCATYARYARYRRYAYKRGRWYAGMAYRKT CWYAG 1740  
Bhutan-09030 MRRRWRAKRWYTYMCTTGAWWYSCYCATYARYARYRRYACTRGRWYAGMAYRKT CWYAG 1740  
Bhutan-09005 CGAGTRRKRACYAAWYRRATCCYTMWYCWRCWACGRYGYKAKARCKGMRCGGCTATRS 1740  
Indonesia-88035 CGAGTRRKRACYAAWYRRATCCYTMWYCWRCWACGRYGTAKARCKGMRCGGCTATRS 1740  
Indonesia-88045 CGAGTRRKRACYAAWYRRATCCYTMWYCWRCWACGRYGTAKARCKGMRCGGCTATRS 1740  
Indonesia-88065 CGAGTRRKRACYAAWYRRATCCYTMWYCWRCWACGRYGTAKARCKGMRCGGCTATRS 1740  
\* \* \* \* . . \* \* \* . \* . \* .

Bhutan-09015 GYKTWCRWYAWGTWWRACYTATRSTCRKYASRKRYTRAACRGGMRYTWAMSRTGTTTMA 1800  
Bhutan-09024 GYKTWCRWYAWGTWWRACYTATRSTCRKYASRKRYTRAACRGGMRYTWAMSRTGTTTMA 1800  
Bhutan-09027 GYKTWCRWYAWGTWWRACYTATRSTCRKYASRKRYTRAACRGGMRYTWAMSRTGTTTMA 1800  
Bhutan-09030 GYKTWCRWYAWGTWWRACYTATRSTCRKYASRKRYTRAACRGGMRYTWAMSRTGTTTMA 1800  
Bhutan-09005 KCKWTTGWCRTRCTWRMYTKRKAGYAGYWSATAYRTCARRRMGYYWRC SAYRYKYMYC 1800  
Indonesia-88035 KCKWTTGWCRTRCTWRMYTKRKAGYAGYWSATAYRTCARRRMGYYWRC SAYRYKYMYC 1800  
Indonesia-88045 KCKWTTGWCRTRCTWRMYTKRKAGYAGYWSATAYRTCARRRMGYYWRC SAYRYKYMYC 1800  
Indonesia-88065 KCKWTTGWCRTRCTWRMYTKRKAGYAGYWSATAYRTCARRRMGYYWRC SAYRYKYMYC 1800  
\* \* \* \* . . \* \* \* \* \* \* \* \* \* \* . \* .

Bhutan-09015 YSRATCATTTKCTAAATKKTRAYKYTKTRMMWAASRRGCYTWKYAYGGGTRTKKYK 1860  
Bhutan-09024 YSRATCATTTKCTAAATKKTRAYKYTKTRMMWAASRRGCYTWKYAYGGGTRTKKYK 1860  
Bhutan-09027 YSRATCATTTKCTAAATKKTRAYKYTKTRMMWAASRRGCYWKYAYGGGTRTKKYK 1860  
Bhutan-09030 YSRATCATTTKCTAAATKKTRAYKYTKTRMMWAASRRGCYWKYAYGGGTRTKKYK 1860  
Bhutan-09005 TGAMGYRYWKMCRRGWKKYRRYGCYGTWRRMATGRSRAYYWKWTCRRKYGKKGKGTG 1860  
Indonesia-88035 TGAMGYRYWKMCRRGWKKYRRYGCYGTWRRMATGASRRAYYWKWTCRRKYGKKGKGTG 1860  
Indonesia-88045 TGAMGYRYWKMCRRGWKKYRRYGCYGTWRRMATGASGRAYYWKWTCRRKYGKKGKGTG 1860  
Indonesia-88065 TGAMGYRYWKMCRRGWKKYRRYGCYGTWRRMATGRSRAYYWKWTCRRKYGKKGKGTG 1860  
. \* . \* \* \* \* \* \* \* \* \* \* \* \* . . \*

Bhutan-09015 YRTRYWTGTAGTCYAGTWSWRTYKCYCTTWGKRYYSYAAAYGGACYRRRTYCAGCATCYK 1920  
Bhutan-09024 YRTRYWTGTAGTCYAGTWSWRTYKCYCTTWGKRYYSYAAAYGGACYRRRTYCAGCATCYK 1920  
Bhutan-09027 YRTRYWTGTAGTCYAGTWSWRTYKCYCTTWGKRYYSYAAAYGGACYRRRTYCAGCATCYK 1920  
Bhutan-09030 YRTRYWTGTAGTCYAGTWSWRTYKCYCTTWGKRYYSYAAAYGGACYRRRTYCAGCATCYK 1920  
Bhutan-09005 CAYRCWCTAGRYYYCTYTSWGGTGYYSKYTAKAYTCTRGYKRRYCGGTYRRYRWYK 1920  
Indonesia-88035 CAYRCWCTAGRYYYCTYTSWGGTGYYSKYTAKAYTCTRGYKRRYCGGTYRRYRWYK 1920  
Indonesia-88045 CAYRCWCTAGRYYYCTYTSWGGTGYYSKYTAKAYTCTRGYKRRYCGGTYRRYRWYK 1920  
Indonesia-88065 CAYRCWCTAGRYYYCTYTSWGGTGYYSKYTAKAYTCTGGYKRRYCGGTYRRYRWYK 1920

\* \* :. \* . \*\* \*.. \* \* . .\*\* \* \* \*\*

Bhutan-09015 GGGRSWKAAAARGATTAYWYRTGRAKAMMRWTGCTRRSARYKCSAYWGGTRSCGWAYATY 1980  
 Bhutan-09024 GGGRSWKAAAARGATTAYWYRTGRAKAMMRWTGCTRRSARYKCSAYWGGTRSCGWAYATY 1980  
 Bhutan-09027 GGGRSWKAAAARGATTAYWYRTGRAKAMMRWTGCTRRSARYKCSAYWGGTRSCGWAYATY 1980  
 Bhutan-09030 GGGRSWKAAAARGATTAYWYRTGRAKAMMRWTGCTRRSARYKCSAYWGGTRSCGWAYATY 1980  
 Bhutan-09005 KSRGCAGRGCRRARYYRTTYAYAGMKMAMRWYRYKRRSRCKYCMYWSKKRSYKWWTWYT 1980  
 Indonesia-88035 KSRGCAGRGCRRARYYRTTYAYAGMKMAMRWYRYKRRSRCKYCMYWSKKRSYKWWTWYT 1980  
 Indonesia-88045 KSRGCAGRGCRRARYYRTTYAYAGMKMAMRWYRYKRRSRCKYCMYWSKKRSYKWWTWYT 1980  
 Indonesia-88065 KSRGCAGRGCRRARYYRTTYAYAGMKMAMRWYRYKRRSRCKYCMYWSKKRSYKWWTWYT 1980  
 . . . . \* . \* \*\* .\*\*\* \* \* . \*\* . \*\* \*

Bhutan-09015 ATYAYGSWGATRRCGSWMKMYGGYYSAYYKRRRGRCRYSTRMYCRKATARATCWYTRCAY 2040  
 Bhutan-09024 ATYAYGSWGATRRCGSWMKMYGGYYSAYYKRRRGRCRYSTRMYCRKATARATCWYTRCAY 2040  
 Bhutan-09027 ATYAYGSWGATRRCGSWMKMYGGYYSAYYKRRRGRCRYSTRMYCRKATARATCWYTRCAY 2040  
 Bhutan-09030 ATYAYGSWGATRRCGSWMKMYGGYYSAYYKRRRGRCRYSTRMYCRKATARATCWYTRCAY 2040  
 Bhutan-09005 WCCRCRCATRWRA YACAACACRRCYSRY YTRRRRGSRCCGCMYTG TGWGMWSWGYRSRT 2040  
 Indonesia-88035 WCCRCRCATRWRA YACAACACRRCYSRY YTRRRRGSRCCGCMYTG TGWGMWSWGYRSRT 2040  
 Indonesia-88045 WCCRCRCATRWRA YACAACACRRCYSRY YTRRRRGSRCCGCMYTG TGWGMWSWGYRSRT 2040  
 Indonesia-88065 WCCRCRCATRWRA YACAACACRRCYSRY YTRRRRGSRCCGCMYTG TGWGMWSWGYRSRT 2040  
 . \* .. \* \*\* \*\* .\*\* \* .. .\* \*\*.

Bhutan-09015 WYAKAYGYKMKASWKASAYRGCRCGMWWYRTRGW SRRRARSYYTYGWRTAYKRMGRTAR 2100  
 Bhutan-09024 WYAKAYGYKMKASWKASAYRGCRCGMWWYRTRGW SRRRARSYYTYGWRTAYKRMGRTAR 2100  
 Bhutan-09027 WYAKAYGYKMKASWKASAYRGCRCGMWWYRTRGW CARRARSYYTYGWRTAYKRMGRTAR 2100  
 Bhutan-09030 WYAKAYGYKMKASWKASAYRGCRCGMWWYRTRGW CARRARSYYTYGWRTAYKRMGRTAR 2100  
 Bhutan-09005 WCRGMTSTTAKWCTGMCYRYSR SAKCAWWAYRYASACARAMRGYTWYSWAKWCTGMACWA 2100  
 Indonesia-88035 WCRGMTSTTAKWCTGMCYRYSR SAKCAWWAYRYASACARAMAGYTWYSWAKWCTGMACWA 2100  
 Indonesia-88045 WCRGMTSTTAKWCTGMCYRYSR SAKCAWWAYRYASACARAMRGYTWYSWAKWCTGMACWA 2100  
 Indonesia-88065 WCRGMTSTTAKWCTGMCYRYSR SAKCAWWAYRYASACARAMRGYTWYSWAKWCTGMACWA 2100  
 \* . . \* . . \*\* . \*\* \*\* . . \* . \* \* . . \*

Bhutan-09015 SRRRAATCRYCTTTARRIATCACMYTYWRTRMRMRWKYRCRGKKGWYAGTRYAYCTAGT 2160  
 Bhutan-09024 SRRRAATCRYCTTTARRIATCACMYTYWRTRMRMRWKYRCRGKKGWYAGTRYAYCTAGT 2160  
 Bhutan-09027 SRRRAATCRYCTTTARRIATCACMYTYWRTRMRMRWKYRCRGKKGWYAGTRYAYCTAGT 2160  
 Bhutan-09030 SRRRAATCRYCTTTARRIATCACMYTYWRTRMRMRWKYRCRGKKGWYAGTRYAYCTAGT 2160  
 Bhutan-09005 SAGGTYYRYYYCCRGRTYRYATYKWAYGMACRAKTAYRSTGAGYWARAATWTY YMRY 2160  
 Indonesia-88035 SAGGTYYRYYYCCRGRTYRYATYKWAYGMACRAKTAYRSTGRGYWRRATWTY YMGY 2160  
 Indonesia-88045 SAGGTYYRYYYCCRGRTYRYATYKWAYGMACRAKTAYRSTGAGYWRRATWTY YMGY 2160  
 Indonesia-88065 SAGGTYYRYYYCCRGRTYRYATYKWAYGMACRAKTAYRSTGRGYWARAATWTY YMRY 2160  
 \* .: \*\* \* \* . \* \* \* \* . . \*\* :

Bhutan-09015 KATCAYTRACRCGGSYCTWWAGSYWRAWYATATGGRCCCA YGGTYSYMMRSRAKSCACC 2220  
 Bhutan-09024 KATCAYTRACRCGGSYCTWWAGSYWRAWYATATGGRCCCA YGGTYSYMMRSRAKSCACC 2220  
 Bhutan-09027 KATCAYTRACRCGGSYCTWWAGSYWRAWYATATGGRCCCA YGGTYSYMMRSRAKSCACC 2220  
 Bhutan-09030 KATCAYTRACRCGGSYCTWWAGSYWRAWYATATGGRCCCA YGGTYSYMMRSRAKSCACC 2220  
 Bhutan-09005 GAYGGCYRWMRTRKSYYYWWWASKTWRRATWTRTKRGSYYGTSGKCCCAAGGGTKGARS 2220  
 Indonesia-88035 KMTGGCYRWMRTRKSYYYWWWASKTWRRATWTRTKRGSYYGTSGKCCCAAGGGTKGARS 2220  
 Indonesia-88045 KMTGGCYRWMRTRKSYYYWWWASKTWRRATWTRTKRGSYYGTSGKCCCAAGGGTKGARS 2220  
 Indonesia-88065 GAYGGCYRWMRTRKSYYYWWWASKTWRRATWTRTKRGSYYGTSGKCCCAAGGGTKGARS 2220  
 . \* \* \*\* \*\* . \* \*\* . . . . . :\* . . .

Bhutan-09015 TYTYKTKTRTRTAKYAAYWYMGKMTAMCYGACTCWRYMGRKACACYYGAGGTRYRRTAYY 2280  
 Bhutan-09024 TYTYKTKTRTRTAKYAAYWYMGKMTAMCYGACTCWRYMGRKACACYYGAGGTRYRRTAYY 2280

|                 |                                                                |      |
|-----------------|----------------------------------------------------------------|------|
| Bhutan-09027    | TYTYKTKTRTRTAKYAAYWYMGKMTACCYGACTCWRYMGRKACACYYGAGGTRYRRTAYY   | 2280 |
| Bhutan-09030    | TYTYKTKTRTRTAKYAAYWYMGKMTAMCYGACTCWRYMGRKACACYYGAGGYRRTAYY     | 2280 |
| Bhutan-09005    | YYKYGAGYRYAYRRTTMYWYCKTCARCMYRRYTYAGCASAMGMTYYRRRTACAAGGTC     | 2280 |
| Indonesia-88035 | YYKYGAGYRYAYRRTTMYWYCKTCARCMYRRYTYAGCASAMGMTYYRRRTACAAGGTC     | 2280 |
| Indonesia-88045 | YYKYGAGYRYAYRRTTMYWYCKTCARCMYRRYCTAGCASAMGMTYYAGARTACAAGGTC    | 2280 |
| Indonesia-88065 | YYKYGAGYRYAYRRTTMYWYCKTCARCMYRRYTYAGCASAMGMTYYRRRYACAAGGTC     | 2280 |
|                 | * . * : * . : *** . : * . ** .                                 |      |
| Bhutan-09015    | YTTRWCTGYKCCYYYYYCGAYWAGYAWRGATGYAYAGSTTTYTYRTRWKMGTGSKCKGRR   | 2340 |
| Bhutan-09024    | YTTRWCTGYKCCYYYYYCGAYWAGYAWRGATGYAYAGSTTTYTYRTRWKMGTGSKCKGRR   | 2340 |
| Bhutan-09027    | YTTRWCTGYKCCYYYYYCGAYWAGYAWRGATGYAYAGSTTTYTYRTRWKMGTGSKCKGRR   | 2340 |
| Bhutan-09030    | YTTRWCTGYKCCYYYYYCGAYWAGYAWRGATGYAYAGSTTTYTYRTRWKMGTGSKCKGRR   | 2340 |
| Bhutan-09005    | TWYATSWRCTGMMYCTTYRYGARYKTWAARWCRCRYTCCYYTTCWGATMYGGCGRAA      | 2340 |
| Indonesia-88035 | TWYATSWRCTGMMYCTTYRYAATARKTWARRTCRCRYTCSYYTTCWGATMYGGYGRAA     | 2340 |
| Indonesia-88045 | TWYATSWRCTGMMYCTTYRYAATARKTWARRTCRCRYTCSYYTTCWGATMYGGYGRAA     | 2340 |
| Indonesia-88065 | TWYATSWRCTGMMYCTTYRYGARYKTWAARWCRCRYTCCYYTTCWGATMYGGCGRAA      | 2340 |
|                 | . * * . * : . * .                                              |      |
| Bhutan-09015    | GYATSRYYTYYSYGYRRGYRRKRCGWATYYRKSGRWGGTRMTYSWTATMMAYCCTRYYT    | 2400 |
| Bhutan-09024    | GYATSRYYTYYSYGYRRGYRRKRCGWATYYRKSGRWGGTRMTYSWTATMMAYCCTRYYT    | 2400 |
| Bhutan-09027    | GYATSRYYTYYSYGYRRGYRRKRCGWATYYRKSGRWGGTRMTYSWTATMMAYCCTRYYT    | 2400 |
| Bhutan-09030    | GYATSRYYTYYSYGYRRGYRRKRCGWATYYRKSGRWGGTRMTYSWTATMMAYCCTRYYT    | 2400 |
| Bhutan-09005    | KCRTGGTYTCSCATRAKYAGTAYKARYTTCRRCKAWTRARACCGTYWYACGTATYGYCTY   | 2400 |
| Indonesia-88035 | KCRYGGTYTCSCATRAKYAGTAYKARYTTCRRCKAWTRARACCGTYWYACGTATYGYCTY   | 2400 |
| Indonesia-88045 | KCRYGGTYTCSCATRAKYAGTAYKARYTTCAGCKAWTAARACCGTYWYACGTATYGYCTY   | 2400 |
| Indonesia-88065 | KCRTGGTYTCSCATRAKYAGTAYKARYTTCRRCKAWTAARACCGTYWYACGTATYGYCTY   | 2400 |
|                 | . * * . * * . * : * . .                                        |      |
| Bhutan-09015    | AGTGCRKRARARMYCTTMAARAYYCSSTTRGMYAWATRGYYRWRYGMCYRWRYGWSSC     | 2460 |
| Bhutan-09024    | AGTGCRKRARARMYCTTMAARAYYCSSTTRGMYAWATRGYYRWRYGMCYRWRYGWSSC     | 2460 |
| Bhutan-09027    | AGTGCRKRARARMYCTTMAARAYYCSSTTRGMYAWATRGYYRWRYGMCYRWRYGWSSC     | 2460 |
| Bhutan-09030    | AGTGCRKRARARMYCTTMAARAYYCSSTTRGMYAWATRGYYRWRYGMCYRWRYGWSSC     | 2460 |
| Bhutan-09005    | WRYKYGKRRRMGCCTAYARMAGTTCTYCYAKCCMARWRRRYTCGAAYAAAYTRAGTKAGYY  | 2460 |
| Indonesia-88035 | WRYGYGKRRRMGCCTATARMAGTTCTYCYAKCCMARWRRRYTCGAAYAAAYCRAAGTKAGYY | 2460 |
| Indonesia-88045 | WRYGYGKRRRMGCCTATARMAGTTCTYCYAKCCMARWRRRYTCGAAYAAAYCRAAGTKAGYY | 2460 |
| Indonesia-88065 | WRYKYGKRRRMGCCTAYARMAGTTCTYCYAKCCMARWRRRYTCGAAYAAAYTRAGTKAGYY  | 2460 |
|                 | ** * : . . ** * . *                                            |      |
| Bhutan-09015    | CAYRWMRRKYSKTRTSTSCCCTAYAYAKRATRYAGRRGKRATTYAARRYTCWTAYYTGW    | 2520 |
| Bhutan-09024    | CAYRWMRRKYSKTRTSTSCCCTAYAYAKRATRYAGRRGKRATTYAARRYTCWTAYYTGW    | 2520 |
| Bhutan-09027    | CAYRWMRRKYSKTRTSTSCCCTAYAYAKRATRYAGRRGKRATTYAARRYTCWTAYYTGW    | 2520 |
| Bhutan-09030    | CAYRWMRRKYSKTRTSTSCCCTAYAYAKRATRYAGRRGKRATTYAARRYTCWTAYYTGW    | 2520 |
| Bhutan-09005    | MMCGACGRKYCTYGCGCCYYTAYRRCRKGRYACRAGATARACTGRAAYTCMTCRKYKSW    | 2520 |
| Indonesia-88035 | MCCGACGRKYCTYGYGTCYKMYRRCRKGRTACRAGATARACTGAAAYTCMTCRKYKSW     | 2520 |
| Indonesia-88045 | MMCGACGRKYCTYGYGTCYKMYRRCRKGRTACRAAGATARACTGAAAYTCMTCRKYKSW    | 2520 |
| Indonesia-88065 | MMCGACGRKYCTYGCGCCYYTAYRRCRKGRYACAAAGATARACTGRAAYTCMTCRKYKSW   | 2520 |
|                 | *** . . . * * . . : . * ** *                                   |      |
| Bhutan-09015    | YGRYGYMTMWRGRWYATMTTYAAAYRRAMRRTKWGCRTYAYCGYGCRRRTKTRKYKAWK    | 2580 |
| Bhutan-09024    | YGRYGYMTMWRGRWYATMTTYAAAYRRAMRRTKWGCRTYAYCGYGCRRRTKTRKYKAWK    | 2580 |
| Bhutan-09027    | YGRYGYMTMWRGRWYATMTKYAAAYRRAMRRTKWGCRTYAYCGYGCRRRTKTRKYKAWK    | 2580 |
| Bhutan-09030    | YGRYGYMTMWRGRWYATMTTYAAAYRRAMRRTKWGCRTYAYCGYGCRRRTKTRKYKAWK    | 2580 |
| Bhutan-09005    | YRGYSMYCAWAKGTCYRYCYTCMGGCAARARAWGWGCRCYACMAYTYAAAYATYAGTGATT  | 2580 |
| Indonesia-88035 | YRGYSMYCAWAKGTCYRYCYTCAGGYAARARAWGWSRYCGCMAYTYAAAYATTAGTGWTT   | 2580 |

Indonesia-88045 YRGYSMYCAWAKGTCYRYCYTCAGGYAARARAWGWSRYCGCMAYTYAAAYATTAGTGWTT 2580  
Indonesia-88065 YRGYSMYCAWAKGTCYRYCYTCMGCCAARARAWGWGCRYCACCAYTYAAAYATYAGTGATT 2580  
\* \* .\*\* \* \* . . . \* \* .\* . .\* :. .

Bhutan-09015 RRWTYRGCTAAMCCMWYRTAYCGYRKTMTTGGSYCAMMGCTWMSWCWRAYGGRTSRSR 2640  
Bhutan-09024 RRWTYRGCTAAMCCMWYRTAYCGYRKTMTTGGSYCAMMGCTWMSWCWRAYGGRTSRSR 2640  
Bhutan-09027 RRWTYRGCTAAMCCMWYRTAYCGYRKTMTTGGSYCAMMGCTWMSWCWRAYGGRTSRSR 2640  
Bhutan-09030 RRWTYRGCTAAMCCMWYRTAYCGYRKTMTTGGSYCAMMGCTWMSWCWRAYGGRTSRSR 2640  
Bhutan-09005 AGTWCSSCRGCYSSMWYRRCSTAGCCYKCCYTAACRSYYAACAMTRRTTRGGCRGR 2640  
Indonesia-88035 AGTTCGSSYAGCYSSMWYRRCSTAGCCYKCCYTRACRSYYAACAMTRRTTRGGCRGR 2640  
Indonesia-88045 AGTTCGSSYAGCYSSMWYRRCSTAGCCYKCCYTRACRSYYAACAMTRRTTRGGCRGR 2640  
Indonesia-88065 AGTWCSSCRGCYSSMWYRRCSTAGCCYKCCYTAACRSYYAACAMTRRTTRGGCRGR 2640  
. . . .\*\*\* . . \* . . \* .\*\*

Bhutan-09015 ASWCYKTCATTYGWSRGCRRMSYTMRYTRAYWTYYTSYATYYGSYTTGAARYRTCCM 2700  
Bhutan-09024 ASWCYKTCATTYGWSRGCRRMSYTMRYTRAYWTYYTSYATYYGSYTTGAARYRTCCM 2700  
Bhutan-09027 ASWCYKTCATTYGWSRGCRRMSYTMRYTRAYWTYYTSYATYYGSYTTGAARYRTCCM 2700  
Bhutan-09030 ASWCYKTCATTYGWSRGCRRMSYTMRYTRAYWTYYTSYATYYGSYTTGAARYRTCCM 2700  
Bhutan-09005 RCTMTKGTGGGYGTCRRYRAAASFTCCRYRRTTAGCTYCCMCTKCCAWRRTRTAYMYA 2700  
Indonesia-88035 ACTCTGGTGGTTKTCRRYRAAASFTCCRYRRTTAGCTYCCMCTKCCAWRRTRTAYMYA 2700  
Indonesia-88045 ACTCTGGTGGTTKTCRRYRAAASFTCCRYRRTTAGCTYCCMCTKCCAWRRTRTAYMYA 2700  
Indonesia-88065 RCTMTKGTGGGYGTCRRYRAAASFTCCRYRRTTAGCTYCCMCTKCCAWRRTRTAYMYA 2700  
. . . \* \* \* \* \* : . . . :\*

Bhutan-09015 RGYRTRCYTCWTRCRAGSGCTRRAAGYTAWYACWWYKYAGYTCYCYWYWYACRCACRKT 2760  
Bhutan-09024 RGYRTRCYTCWTRCRAGSGCTRRAAGYTAWYACWWYKYAGYTCYCYWYWYACRCACRKT 2760  
Bhutan-09027 RGYRTRCYTCWTRCRAGSGCTRRAAGYTAWYACWWYKYAGYTCYCYWYWYACRCACRKT 2760  
Bhutan-09030 RGYRTRCYTCWTRCRAGSGCTRRAAGYTAWYACWWYKYAGYTCYCYWYWYACRCACRKT 2760  
Bhutan-09005 ASYAGAYTAYAAAYRRCGYKYYAARWRTKRWTCCAWTGTWRTYCYWYWYRYYRYRTGGA 2760  
Indonesia-88035 ASYAKACTAYAAAYRRCGYKYYAARARTKRWTCTAWTGTAGTTCCYCYWYWYRYYRYRTGGA 2760  
Indonesia-88045 ASYAKAYTAYAAAYRRCGYKYYAARARTKRWTCTAWTGTAGTTCCYCYWYWYRYYRYRTGGA 2760  
Indonesia-88065 ASYAGACTAYAAAYRRCGYKYYAARWRTKRWTCCAWTGTWRTYCYWYWYRYYRYRTGGA 2760  
.\* : : \* . . \* . \* \*\* \*\*\* \* :

Bhutan-09015 WAAYTAYATKCTRMGSKASMTAAMCGYKTGTAAYMKYYRCTWWTCTYYAKYAAARTSY 2820  
Bhutan-09024 WAAYTAYATKCTRMGSKASMTAAMCGYKTGTAAYMKYYRCTWWTCTYYAKYAAARTSY 2820  
Bhutan-09027 WAAYTAYATKCTRMGSKASMTAAMCGYKTGTAAYMKYYRCTWWTCTYYAKYAAARTSY 2820  
Bhutan-09030 WAAYTAYATKCTRMGSKASMTAAMCGYKTGTAAYMKYYRCTWWTCTYYAKYAAARTSY 2820  
Bhutan-09005 ARGYYRCAYTYTRCRCKASACTGASACKCRYRRTAGYYRRTTTTYMCCCRKTRRYGCGT 2820  
Indonesia-88035 ARGYYRCRYTYRRCRCGMSACTGMSACKCRYRRTAGYYRRTTYTYMCCCRKTRRYGCGT 2820  
Indonesia-88045 ARGYYRCRYTYRRCRCGMSACTGMSACTCRYRRTAGYYRRTTYTYMCCCRKTRRYGCGT 2820  
Indonesia-88065 ARGYYRCAYTYTRCRCKASACTGASACKCRYRRTAGYYRRTTTTYMCCCRKTRRYGCGT 2820  
.\* . \* . \* :. . . \*\*\*\* \*

Bhutan-09015 RSYWTRYRKRMMWATAGTRRYRTCTKKYSTTYYYAYGYTARTMYCTSYCYCYCAARTCRK 2880  
Bhutan-09024 RSYWTGYRKRMMWATAGTRRYRTCTKKYSTTYYYAYGYTARTMYCTSYCYCYCAARTCRK 2880  
Bhutan-09027 RSYWTRYRKRMMWATAGTRRYRTCTKKYSTTYCYAYGYTARTMYCTSYCYCYCAARTCRK 2880  
Bhutan-09030 RSYWTGYRKRMMWATAGTRRYRTCTKKYSTTYYYAYGYTARTMYCTSYCYCYCAARTCRK 2880  
Bhutan-09005 GCTAAGYRGRMWTRYRRYAGTGWYKGC SGKTCYWYRYCGCCMYSTACCMYGTRYGK 2880  
Indonesia-88035 GCTAAGYRGRMWTRYRRYAGTGWYKGC SGKTCYWYRYCGCCMYSTACCMYGTRYGK 2880  
Indonesia-88045 GCTAAGYRGRMWTRYRRYAGTGWYKGC SGKTCYWYRYCGCCMYSTACCMYGTRYGK 2880  
Indonesia-88065 GCTAAGYRGRMWTRYRRYAGTGWYKGC SGKTCYWYRYCGCCMYSTACCMYGTRYGK 2880  
. : \*\* \*\*\* \* \* . \* \* \* . \* . :\* \*

Bhutan-09015 GAGTRTKYGTAYMGYTAYCWC GGGYRKT KYGAARAMYRCCYRARGRWGMYWRMWRKR 2940  
 Bhutan-09024 GAGTRTKYGTAYMGYTAYCWC GGGYRKT TYGAARAMYRCC TAARGRWGMYWRMWRKR 2940  
 Bhutan-09027 GAGTRTKYGTAYMGYTAYCWC GGGYRKT KYGAARAMYRCCYRARGRWGMYWRMWRKR 2940  
 Bhutan-09030 GAGTRTKYGTAYMGYTAYCWC GGGYRKT KYGAARAMYRCCYRARGRWGMYWRMWRKR 2940  
 Bhutan-09005 KWR TAKGTRWRCARYTWYMT MRSRTTGKKTTRMRACCCRYSCARGKGRSMCARMTKGTA 2940  
 Indonesia-88035 KAGTATGTGTACAGCTATCTCGGGTTGTTTTGARACCCGCCAAGGGTAGCCAGATKGTA 2940  
 Indonesia-88045 KAGKATGTGTACAGCTATCTCGGGTTGTTTTGARACCCGCCAAGGGTAGCCAGATKGTA 2940  
 Indonesia-88065 KWR TAKGTRWRCARYYWYMT MRSRTTGKKTTRMRACMYRYSCARGKGRSMCARMTKGTA 2940

. . . . .

Bhutan-09015 TTWRMSAYMSYRAS YRKYCCYCYRKYWKAGWRWCTGGWYSWMWYRRSWRACYAYCWRAY 3000  
 Bhutan-09024 TTWRMSAYMSYRAS YRKYCCYCYRKYWKAGWRWCTGGWYSWMWYRRSWRACYAYCWRAY 3000  
 Bhutan-09027 TTWRMSAYMSYRAS YRKYCCYCYRKYWKAGWRWCTGGWYSWMWYRRSWGACYAYCWRAY 3000  
 Bhutan-09030 TTWRMSAYMSYRAS YRKYCCYCYRKYWKAGWRWCTGGWYSWMWYRRSWGACYAYCWRAY 3000  
 Bhutan-09005 YYARMMRYCCCAMSYRKYCYTMTGKATCKTRWAMYRRAYCTCWYRRCARSTRCYTGRC 3000  
 Indonesia-88035 TTAACGTC CCAAGCGGCTTTCTGTATCTTATAACTGGATCTCTYAGCAA CTACTTGAC 3000  
 Indonesia-88045 TTAACGTC CCAAGCGGCTTTCTGTATCTTATAACTGGATCTCTYAGCAA CTACTTGAC 3000  
 Indonesia-88065 YYARMAAYCCCAMSYRKYCYTMTGKATCKTRWAMYRRAYCTCWYRRCARSTRCYTGRC 3000

. . . . . \*

Bhutan-09015 YMGYYTYTGRRRKCTGAGSRKKYKTRWRMKWSAMYRRACSMYMRRSATCMTRWRKRWGWY 3060  
 Bhutan-09024 YMGYYTYTGRRRKCTGAGSRKKYKTRWRMKWSAMYAGACSMYMRRSATCMTRWRKRWGWY 3060  
 Bhutan-09027 YMGYYTYTGRRRKCTGAGSRKKYKTRWRMKWSAMYRRACSMYMRRSATCMTRWRKRWGWY 3060  
 Bhutan-09030 YMGYYTYTGRRRKCTGAGSRKKYKTRWRMKWSAMYRRACSMYMRRSATCMTRWRKRWGWY 3060  
 Bhutan-09005 YAKCTYCCRARASMMWKWSRKG YKWGWRTWSAMYARMGCMTRRSRGY AARTGGARWT 3060  
 Indonesia-88035 CAGCTTCCGAAAGCCTGAGGGTGCKTGWSCTTCWACAGAGCCTCGGGGGCAAATGGARTT 3060  
 Indonesia-88045 CAGCTTCCGAAAGCCTGAGGGTGCKTGWSCTTCWACAGAGCCTCGGGGGCAAATGGARTT 3060  
 Indonesia-88065 YAKCTYCCRARASMMWKWSRKG YKWGWRTWSAMYARMGCMTRRSRGY AARTGGARWT 3060

. . \* \* . . . :

Bhutan-09015 TAYTYRWWYGR TAAKAGRRYTYRRKARAMCAGRRKKRRGSRYWKRCMYTCKAAAYKCKWM 3120  
 Bhutan-09024 TAYTYRWWYGR TAAKAGRRYTYRRKARAMCAGRRKKRRGSRYWKRCMYTCKAAAYKCKWM 3120  
 Bhutan-09027 TAYTYRWWYGR TAAKAGRRYTYRRKARAMCAGRRKKRRGSRYWKRCMYTCKAAAYKCKWM 3120  
 Bhutan-09030 TAYTYRWWYGR TAAKAGRRYTYRRKARAMCAGRRKKRRGSRYWKRCMYTCKAAAYKCKWM 3120  
 Bhutan-09005 CMYYTGWAYARYMAKMRRCGTGATWRAMYASAATTARRCGTTTGMA YCKWARCMTYTA 3120  
 Indonesia-88035 YATTYGAACAGTAWGARAGCTCGATWAWACRGAATTAAGCGTTTGCACTYKAMACATCTA 3120  
 Indonesia-88045 YATTYGAACAGTAWGARAGCTCGATWAWACRGAATTAAGCGTTTGCACTYKAMACATCTA 3120  
 Indonesia-88065 CMYYTGWAYARYMAKMRRCGTGATWRAMYASAATTARRCGTTTGMA YCKWARCMTYTA 3120

. . . . . \*

Bhutan-09015 KGCYYYGYCGWRAGKCYTGGA KKCTRRRWRKCMRMGRTTASWY YGTYMARTWYYYWMWYY 3180  
 Bhutan-09024 KGCYYYGYCGWRAGKCYTGGA KKCTRRRWRKCMRMGRTTASWY YGTYMARTWYYYWMWYY 3180  
 Bhutan-09027 KGCYYYGYCGWRAGKCYTGGA KKCTRRRWRKCMRMGRTTASWY YGTYMARTWYYYWMWYY 3180  
 Bhutan-09030 KGCYYYGYCGWRAGKCYTGGA KKCTRRRWRKCMRMGRTTASWY YGTYMARTWYYYWMWYY 3180  
 Bhutan-09005 GRYYYYRCCRWAR RKM TWKRRKGMWRRGAAGYMGARRKYRSACYSYMMRYTYTYTWAYC 3180  
 Indonesia-88035 GGCCTTG CYRTAAGTCTTGAGGGCTAGGAAGTAGAGGTTACTGTCCAATTCTTTAACC 3180  
 Indonesia-88045 GGCCTTG CYRTAAGTCTTGAGGGCTAGGAAGTAGAGGTTACTGTCCAATTCTTTAACC 3180  
 Indonesia-88065 GRYYYYRCCRWAR RKM TWKRRKGMWRRGAAGYMGARRKYRSACYSYMMRYTYTYTWAYC 3180

. . . . .

Bhutan-09015 YMCWYTWAWA WSKSRWGMWRAWY WYCRCCGRCRYYYMMTATRYRGRYSRTMYGRKTRTRY 3240  
 Bhutan-09024 YMCWYTWAWA WSKSRWGMWRAWY WYCRCCGRCRYYYMMTATRYRGRYSRTMYGRKTRTRY 3240  
 Bhutan-09027 YMCWYTWAWA WSKSRWGMWRAWY WYCGMCGRCRYYYMMTATRYRGRYSRTMYGRKTRTRY 3240  
 Bhutan-09030 TMCWYTWAWA WSKSRWGMWRAWY WYCRCCGRCRYYYMMTATRYRGRYSRTMYGRKTRTRY 3240

Bhutan-09005 YAYTTYAARWGGSSRAARTARWCAYYGCYRATGYCYCCCMYRYGTATGRWMYRRTYRYRY 3240  
 Indonesia-88035 CATTTTAAATGGCGAAGTAATCACYGCCGATGYCYCCCMYRYGTATGRWMYRRTYRYRY 3240  
 Indonesia-88045 CATTTTAAATGGCGAAGTAATCACYGCCGATGYCYCCCMYRYGTATGRWMYRRTYRYRY 3240  
 Indonesia-88065 TAYTTYAARWGGSSRAARTARWCAYYGCYRATGYCYCCCMYRYGTATGRWMYRRTYRYRY 3240  
 . . . . . \*\* \* \*\* . \* \*\* \* . \* \*\*

Bhutan-09015 KYYRYCGKRRTSAAWYRGRARRCCAGTCGAYRYMKYYKRMACATCMRARRTATTRTTGRT 3300  
 Bhutan-09024 KYYRYCGKRRTSAAWYRGRARRCCAGTCGAYRYMKYCGRMACATCMRARRTATTRTTGRT 3300  
 Bhutan-09027 KYYRYCGKRRTSMAWYRGRARRCCAGTCGAYRYMKYYKRMACATCMRARRTATTRTTGRT 3300  
 Bhutan-09030 KYYRYCGKRRTSAAWYRGRARRCCAGTCGAYRYMKYCGRMACATCMRARRTATTRTTGRT 3300  
 Bhutan-09005 TTCACYATARKSAGTCGKRCRGSYTSWCAYMKKTKRCRYRAMCGWRACMYWRYKRY 3300  
 Indonesia-88035 TTCACYATARKSMRTCGKRCRGSYTSWCATMKKTKRCRYRAMCGWRACMYWRYKRY 3300  
 Indonesia-88045 TTCACYATARKSMRTCGKRCRGSYTSWCATMKKTKRCRYRAMCGWRACMYWRYKRY 3300  
 Indonesia-88065 TTCACYATARKSAGTCGKRCRGSYTSWCATMKKTKRCRYRAMCGWRACMYWRYKRY 3300  
 . . . \* . \* . \* . . . . . \*\* \* : \* \* \*

Bhutan-09015 CSGKYSGRKYARACGMWYTCASRRMCTMTTTYAAWGGYTASKCTCTTTAACMRYAACR 3360  
 Bhutan-09024 CSGKYSGRKYARACGMWYTCASRRMCTMTTTYAAWGGYTASKCTCTTTAACMRYAACR 3360  
 Bhutan-09027 CSGKYSGRKYARACGMCWTCASRRMCTMTTTYAAWGGYTASKCTCTTTAACMRYAACR 3360  
 Bhutan-09030 CSRKYSGRKYARACGMCWTCASRRMCTMTTTYAAWGGYTASKCTCTTTAACMRYAACR 3360  
 Bhutan-09005 TGGKYSRAWCRAMSKMCAYMWAGATCCWWGCTWRTCRYGRGKAKTACCRGGAATMYYS 3360  
 Indonesia-88035 TGGKYSRAWCRAMSKMCAYMWAGATCCWWGCTWRTCRYGRGKAKTACCRGGAATMYYS 3360  
 Indonesia-88045 TGGKYSRAWCRAMSKMCAYMWAGATCCWWGCTWRTCRYGRGKAKTACCRGGAATMYYS 3360  
 Indonesia-88065 TGGKYSRAWCRAMSKMCAYMWAGATCCWWGCTWRTCRYGRGKAKTACCRGGAATMYYS 3360  
 . \*\*\* . \* . \* . \* . \* . : .

Bhutan-09015 TRRSKYRYYSRTGAAYRRMGCKCGYTATKRAKYWRAGTCTTYAAMKGMTCKYTMGCRKTC 3420  
 Bhutan-09024 TRRSKYRYYSRTGAAYRRMGCKCGYTATKRAKYWRAGTCTTYAAMKGMTCKYTMGCRKTC 3420  
 Bhutan-09027 TRRSKYRYYSRTGAAYRRMGCKCGYTATKRAKYWRAGTCTTYAAMKGMTCKYTMGCRKTC 3420  
 Bhutan-09030 TRRSKYRYYSRTGAAYRRMGCKCGYTATKRAKYWRAGTCTTYAAMKGMTCKYTMGCRKTC 3420  
 Bhutan-09005 YGGGGCGCTGAYTRWTGRMAYGYRCYWYTGKKTARMKYAYWYRWMTTKCAKYMAYATYY 3420  
 Indonesia-88035 YGGGGCGCTGAYTRWTGRMAYGYRCYWYTGKKTARMKYAYWYRWMTTKCAKYMAYATYY 3420  
 Indonesia-88045 YGGGGCGCTGAYTRWTGRMAYGYRCYWYTGKKTARMKYAYWYRWMTTKCAKYMAYATYY 3420  
 Indonesia-88065 YGGGGCGCTGAYTRWTGRMAYGYRCYATTGKKTARMKYAYWYRWMTTKCAKYMAYATYY 3420  
 . . . . . \*\* . . : \* \* . \* \* . . \*\* . .

Bhutan-09015 CRCAKWTRCMRTYRWMRWCRMGWYTTGGTTYCGWAACCCRRWRSKAGRRCAYYRAGRY 3480  
 Bhutan-09024 CRCAKWTRCMRTYRWMRWCRMGWYTTGGTTYCGWAACCCRRWRSKAGRRCAYYRAGRY 3480  
 Bhutan-09027 CRCAKWTRCMRTYRWMRWCRMGWYTTGGTTYMRWAACCCRRWRSKAGRRCAYYRAGRY 3480  
 Bhutan-09030 CRCAKWTRCMRTYRWMRWCRMGWYTTGGTTYMRWAACCCRRWRSKAGRRCAYYRAGRY 3480  
 Bhutan-09005 YRTGKTYRYCAYTGWMAAMRATCTTYACRKTTCGAGRMYGGWACGWKRAMYRCTAGRRT 3480  
 Indonesia-88035 YRTGKTYRYCAYTGCAAMRATCTTYACRKTTCGAGRMYGGWACGWKRAMYRCTAGRRT 3480  
 Indonesia-88045 YRTGKTYRYCAYTGCAAMRATCTTYACRKTTCGAGRMYGGWACGWKRAMYRCTAGRRT 3480  
 Indonesia-88065 YRTGKTYRYCAYTGWMAAMRATCTTYACRKTTCGAGRMYGGWACGWKRAMYRCTAGRRT 3480  
 \* . \* \* . \* . . . \* . \* . \*

Bhutan-09015 RTYYRTTGRTTYAYASKRCTCTTCAAMYGGGGWARAAYSARAMAYMGACRKCCTRWGARR 3540  
 Bhutan-09024 RTYYRTTGRTTYAYASKRCTCTTCAAMYGGGGWARAAYSARAMAYMGACRKCCTRWGARR 3540  
 Bhutan-09027 RTYYRTTGRTTYAYASKRCTCTTCAAMYGGGGWARAAYSARAMAYMGACRKCCTRWGARR 3540  
 Bhutan-09030 RTYYRTTGRTTYAYASKRCTCTTCAAMYGGGGWARAAYSARAMAYMGACRKCCTRWGARR 3540  
 Bhutan-09005 GYTYAYWRRYKCTCRSGSGWYGYRRTAARRTMRAACGYARAGYMRCRSGKCATGRMAA 3540  
 Indonesia-88035 GYTYAYWRRYKCTCRSGSGWYGYRRTAARRTMRAACGYARAGYMRCRSGKCATGRMAA 3540  
 Indonesia-88045 GYTYACWRRYKCTCRSGSGWYGYRRTAARRTMRAACGYAAAAGYMRCRSGKCATGRMAA 3540  
 Indonesia-88065 GYTYACWRRYKCTCRSGSGWYGCCRRCTAARRTMRTACGYAAAAGYMRCRSGKCATGRMAA 3540



\* \* . : . . . . \* : : . . \*\* . \*\*

Bhutan-09015 YAMTKTWARGCSMGAARRRYCRWRRAATRCWGYYCRGRSWAYYYYGCWWACRSYGWGSRK 3600  
 Bhutan-09024 YAMTKTWARGCSMGAARRRYCRWRRAATRCWGYYCRGRSWAYYYYGCWWACRSYGWGSRK 3600  
 Bhutan-09027 YAMTKTWARGCSMGAARRRYCRWRRAATRCWGYYCRGRSWAYYYYGCWWACRSYGWGSRK 3600  
 Bhutan-09030 YAMTKTWARGCSMGAARRRYCRWRRAATRCWGYYCRGRSWAYYYYGCWWACRSYGWGSRK 3600  
 Bhutan-09005 TTMKGATGRKAGCTRAGATYGMGRMGCAAYAKTYTAKGCTTTCYTAYTAGTACTRARGAK 3600  
 Indonesia-88035 TTMKGATGRKAGCTRAGATYGMGRMGCAAYAKTYTAKGCTTTCYTAYTAGTACTRARGAK 3600  
 Indonesia-88045 TTMKGATGRKAGCTRAGATYGMGRMGCAAYAKTYTAKGCTTTCYTAYTAGTACTRARGAK 3600  
 Indonesia-88065 TTMKGATGRKAGCTRAGATYGMGRMGCAAYAKTYTAKGCTTTCYTAYTAGTACTRARGAK 3600  
 : \* . : . \* . . : \* . . . . \*

Bhutan-09015 YYSYRRARCACKYTMGRCARTYYWATWAWYRYKYSYTCAYRGYKYCKAWMKTKAATWKC 3660  
 Bhutan-09024 YYSYRRARCACKYTMGRCARTYYWATWAWYRYKYSYTCAYRGYKYCKAWMKTKAATWKC 3660  
 Bhutan-09027 YYSYRRARCACKYTMGRCARTYYWATWAWYRYKYSYTCAYRGYKYCKAWMKTKAATWKC 3660  
 Bhutan-09030 YYSYRRARCACKYTMGRCARTYYWATWAWYRYKYSYTCAYRGYKYCKAWMKTKAATWKC 3660  
 Bhutan-09005 YTSRTARGGYTTKYWMARAWAWTTTMKAGWCGCGGCWWTGSCYKTKMWMKYKCRWGG 3660  
 Indonesia-88035 YTSRTARGGYTTKYWMARAWAWTTTMKAGWCGCGGCWWTGSCYKTKMWMKYKCRWGG 3660  
 Indonesia-88045 YTSRTARGGYTTKYWMARAWAWTTTMKAGWCGCGGCWWTGSCYKTKMWMKYKCRWGG 3660  
 Indonesia-88065 YTSRTARGGYTTKYWMARAWAWTTTMKAGWCGCGGCWWTGSCYKTKMWMKYKCRWGG 3660  
 \* \* . : \*\* \* . . . \* . . \*\* \* \*\* \* . \*

Bhutan-09015 GAGRACSSWACKYRARTRYAGGYAACTYGYGWYGCYKRTAAGGTPKAKCYRRYTSKCGY 3720  
 Bhutan-09024 GAGRACSSWACKYRARTRYAGGYAACTYGYGWYGCYKRTAAGGTPKAKCYRRYTSKCGY 3720  
 Bhutan-09027 GAGRACSSWACKYRARTRYAGGYAACTYGYGWYGCYKRTAAGGTPKAKCYRRYTSKCGY 3720  
 Bhutan-09030 GAGRACSSWACKYRARTRYAGGYAACTYGYGWYGCYKRTAAGGTPKAKCYRRYTSKCGY 3720  
 Bhutan-09005 RWSGMMSSWWMKYGMAGAYCAAYWRTCTACCTWTWYTCGRYWRKYTRKYCAGCKCTYSY 3720  
 Indonesia-88035 RWSGMMSSWWMKYGMAGAYCAAYWRTCTACCTWTWYTCGRYWRKYTRKYCAGCKCTYSY 3720  
 Indonesia-88045 RWSGMMSSWWMKYGMAGAYCAAYWRTCTACCTWTWYTCGRYWRKYTRKYCAGCKCTYSY 3720  
 Indonesia-88065 RWSGMMSSWWMKYGMAGAYCAAYWRTCTACCTWTWYTCGRYWRKYTRKYCAGCKCTYSY 3720  
 . \*\*\* \*\* \* . . \* . \* . . \* . . . \*

Bhutan-09015 YCTYMAGTRCATA YRMSTYRMYGCGYKCGATCSGSYYGWYKAARWCRCRCWTRGG 3780  
 Bhutan-09024 YCTYMAGTRCATA YRMSTYRMYGCGYKCGATCSGSYYGWYKAARWCRCRCWTRGG 3780  
 Bhutan-09027 YCTYMAGTRCATA YRMSTYRMYGCGYKCGATCSGSYYGWYKAARWCRCRCWTRGG 3780  
 Bhutan-09030 YCTYMAGTRCATA YRMSTYRMYGCGYKCGATCSGSYYGWYKAARWCRCRCWTRGG 3780  
 Bhutan-09005 YYATCRSYASA AWTAAAGYAMTYTTTTRKTSRKCRSTCRWYKRAATGCMYGTYYR 3780  
 Indonesia-88035 YYATCRSYASA AWTAAAGYAMTYTTTTRKTSRKCRSTCRWYKRAATGCMYGTYYR 3780  
 Indonesia-88045 YYATCRSYASA AWTAAAGYAMTYTTTTRKTSRKCRSTCRWYKRAATGCMYGTYYR 3780  
 Indonesia-88065 YYATCRSYASA AWTAAAGYAMTYTTTTRKTSRKCRSTCRWYKRAATGCMYGTYYR 3780  
 \* : . . : . \* \* \* . . . \* \* \*\* \*

Bhutan-09015 RAWYAYAAKCCCRYRGTATRSYGYYYRTTCYRYCSCATGCAACSAYRRKWKCYTASWM 3840  
 Bhutan-09024 RAWYAYAAKCCCRYRGTATRSYGYYYRTTCYRYCSCATGCAACSAYRRKWKCYTASWM 3840  
 Bhutan-09027 RAWYAYAAKCCCRYRGTATRSYGYYYRTTCYRYCSCATGCAACSAYRRKWKCYTASWM 3840  
 Bhutan-09030 RAWYAYAAKCCCRYRGTATRSYGYYYRTTCYRYCSCATGCAACSAYRRKWKCYTASWM 3840  
 Bhutan-09005 GRWYRTRRGTYRRCGRYMWGGRRCRTYYGYYSRYGTYWYKMYRRCRCRGGAKSYTYRSAM 3840  
 Indonesia-88035 GRWYRTRRGTYRRCGRYMWGGRRCRTYYGYYSRYGTYWYKMYRRCRCRGGAKSYTYRSAM 3840  
 Indonesia-88045 GRWYRTRRGTYRRCGRYMWGGRRCRTYYGYYSRYGTYWYKMYRRCRCRGGAKSYTYRSAM 3840  
 Indonesia-88065 GRWYRTRRGTYRRCGRYMWGGRRCRTYYGYYSRYGTYWYKMYRRCRCRGGAKSYTYRSAM 3840  
 \*\* \* . \*\* . \*\* . \* \* . \*

Bhutan-09015 AGKGACGAMGGYTMRASRYKRAYTAWRCGRTYYYYRMRAMTCTTRCWMYMTMMWMTK 3900  
 Bhutan-09024 AGKGACGAMGGYTMRASRYKRAYTAWRCGRTYYYYRMRAMTCTTRCWMYMTMMWMTK 3900

|                 |                                                              |      |
|-----------------|--------------------------------------------------------------|------|
| Bhutan-09027    | AGKGACGAMGGYTMRASRYKRAYTAWRYRRTYYYYYRMRAMTCTTRCWMYMTMMWMTK   | 3900 |
| Bhutan-09030    | AGKGACGAMGGYTMRASRYKRAYTAWRYRRTYYYYYRMRAMTCTTRCWMYMTMMWMTK   | 3900 |
| Bhutan-09005    | GAGKWSKTCAAYKARMCGYTAMCYWAATRAWYTCTCAMGGMCYYWYGGACMYCCSAWMYT | 3900 |
| Indonesia-88035 | GAGKWSKTCAAYKARMCGYTAMCYWAATRAWYTCTCAMGGMCCTTGGACMYCCSAWMYT  | 3900 |
| Indonesia-88045 | GAGKWSKTCAAYKAAMCGYTAMCYWAATRAWYTCTCAMGGMCYYTGGACMYCCSAAMYT  | 3900 |
| Indonesia-88065 | GAGKWSKTCAAYKAAMCGYTAMCYWAATRAWYTCTCAMGGMCYYTGGACMYCCSAWMYT  | 3900 |
|                 | .. . : ..* . * . * * ** *                                    |      |
| Bhutan-09015    | AGMKRYRRRGRYRGGYGGSRGYYTTATYTYYYYYTWKRYCGRYKYCWRARWCKCAYSYY  | 3960 |
| Bhutan-09024    | AGMKRYRRRGRYRGGYGGSRGYYTTATYTYYYYYTWKRYCGRYKYCWRARWCKCAYSYY  | 3960 |
| Bhutan-09027    | AGMKRYRRRGRYRGGYGGSRGYYTTATYTYYYYYTWKRYCGRYKYCWRARWCKCAYSYY  | 3960 |
| Bhutan-09030    | AGMKRYRRRGRYRGGYGGSRGYYTTATYTYYYYYTWKRYCGRYKYCWRAGTCKCAYSYY  | 3960 |
| Bhutan-09005    | RSKACGAATGTGRYATTGARYTYRYYCCCTCAWKRYKGTGTAAAGAAAYTYGTCY      | 3960 |
| Indonesia-88035 | RSKACGAATGTGRYATTGARYTYRYYCCCTCAWKRYKGTGTAAARAAAYTYGTCY      | 3960 |
| Indonesia-88045 | RSKACGAATGTGRYATTGARYTYRYYCCCTCAWKRYKGTGTAAARAAAYTYGTCY      | 3960 |
| Indonesia-88065 | RSKACGAATGTGRYATTGARYTYRYYCCCTCAWKRYKGTGTAAARAAAYTYGTCY      | 3960 |
|                 | . * . * . * * :**** . . . *                                  |      |
| Bhutan-09015    | YTMGRYGGRTWAAYCAYKAWYGRGKYAAYAGRSYAKRYRWWCYAGRWYSKCGKAAARRW  | 4020 |
| Bhutan-09024    | YTMGRYGGRTWAAYCAYKAWYGRGKYAAYAGRSYAKRYRWWCYAGRWYSKCGKAAARRW  | 4020 |
| Bhutan-09027    | YTMGRYGGRTWAAYCAYKAWYGRGKYAAYAGRSYAKRYRWWCYAGRWYSKCGKAAARRW  | 4020 |
| Bhutan-09030    | YTMGRYGGRTWAAYCAYKAWYGRGKYAAYAGRSYAKRYRWWCYAGRWYSKCGKAAARRW  | 4020 |
| Bhutan-09005    | YYCSGSCGRRRAAGWCTRTTMTTRRRKCWWTMTGSCRWATAFWMYWRGWCYKTYMGRGAW | 4020 |
| Indonesia-88035 | YYCSGSCGRRRAAGWCTRTTMTTRRRKCWWTMTGSCRWATAFWMYWRGWCYKTYMGRGAW | 4020 |
| Indonesia-88045 | YYCSGSCRRAAGWCTRTTMTTRRRKCWWTMTGSCRWATAFWMYWRGWCYKTYMGRGAW   | 4020 |
| Indonesia-88065 | YYCSGSCRRAAGWCTRTTMTTRRRKCWWTMTGSCRWATAFWMYWRGWCYKTYMGRGAW   | 4020 |
|                 | * . . *: . . * * * * * . * . . *                             |      |
| Bhutan-09015    | YYAATCAGRWWRSKSMYKACTAYCGAAYCYWYTTYKMACKTAKTCGWRMMRRRRTYGC   | 4080 |
| Bhutan-09024    | YYAATCAGRWWRSKSMYKACTAYCGAAYCYWYTTYKMACKTAKTCGWRMMRRRRTYGC   | 4080 |
| Bhutan-09027    | YYAATCAGRWWRSKSMYKACTAYCGAAYCYWYTTYKMACKTAKTCGWRMMARRRRTYGC  | 4080 |
| Bhutan-09030    | YYAATCAGRWWRSKSMYKACTAYCGAAYCYWYTTYKMACKTAKTCGWRMMRRRRTYGC   | 4080 |
| Bhutan-09005    | YYCCCTGAGATAGGKCMYKRYRYSKRRCYTYCYCCGMSTGRKCGRWGAAAGGYCTG     | 4080 |
| Indonesia-88035 | YYCCCTGAGATAGGKCMYKRYRYSKRRCYTYCYCCGMSTGRKCGRWGAAAGGYCTG     | 4080 |
| Indonesia-88045 | YYCCCTGAGATAGGKCMYKRYRYSKRRCYTYCYCCGMSTGGTCGRWGAAAGGYCTG     | 4080 |
| Indonesia-88065 | YYCCCTGAGATAGGKCMYKRYRYSKRRCYTYCYCCGMSTGRKCGRWGAAAGGYCTG     | 4080 |
|                 | **.. . .*.*** * . * *... . *                                 |      |
| Bhutan-09015    | TAGTCCRGRSCGTRTYRMRMCCGCAACAWCGGYRWRYAMKMAWWWMMRRARYTKGMRM   | 4140 |
| Bhutan-09024    | TAGTCCRGRSCGTRTYRMRMCCGCAACAWCGGYRWRYAMKMAWWWMMARRARYTKGMRM  | 4140 |
| Bhutan-09027    | TAGTCCRGRSCGTRTYRMRMCCGCAACAWCGGYRWRYAMKMAWWWMMRRARYTKGMRM   | 4140 |
| Bhutan-09030    | TAGTCCRGRSCGTRTYRMRMCCGCAACAWCGGYRWRYAMKMAWWWMMRRARYTKGMRM   | 4140 |
| Bhutan-09005    | YRSASYRGGCYRWAYTRMAYRYRKRRYMAMKKCRATACRAKMGWWWAMARWRCWKTMG   | 4140 |
| Indonesia-88035 | YRSASYRGGCYRWAYTRMAYRYRKRRYMAMKKCRATACRAKMGWWWAMARWRCWKTMG   | 4140 |
| Indonesia-88045 | YRSASYRGGCYRWAYTRMAYRYRKRRYMAMKKCRATACRAKMGWWWAMARWRCWKTMG   | 4140 |
| Indonesia-88065 | YRSASYRGGCYRWAYTRMAYRYRKRRYMAMKKCRATACRAKMGWWWAMARWRCWKTMG   | 4140 |
|                 | :. * . . *** * **..*** * * * *                               |      |
| Bhutan-09015    | WYCRGMRARYAMKATCRKMYGYTATASASWRCWYWGRKTYRWWCGRGYMKTYRWAAWY   | 4200 |
| Bhutan-09024    | WYCRGMRARYAMKATCRKMYGYTATASASWRCWYWGRKTYRWWCGRGYMKTYRWAAWY   | 4200 |
| Bhutan-09027    | WYCRGMRARYAMKATCRKMYGYTATASASWRCWYWGRKTYRWWCGRGYMKTYRWAAWY   | 4200 |
| Bhutan-09030    | WYCRGMRARYAMKATCRKMYGYTATASASWRCWYWGRKTYRWWCGRGYMKTYRWAAWY   | 4200 |
| Bhutan-09005    | AYAGRAGRRCRAGRYTGTCKYCGKRSRCWRYTYAKRTCYTRAWTRGRCKMYCYRWWAWT  | 4200 |
| Indonesia-88035 | AYAGRAGRRCRAGRYTGTCKYCGKRSRCWRYTYAKRTCYTRAWTRGRCKMYCYRWWAWT  | 4200 |

|                 |                                                               |      |
|-----------------|---------------------------------------------------------------|------|
| Indonesia-88045 | AYAGRAGRRCRAGRYTGTCKCYCGKRSRCRWRYTYAKRTCYTRAWTRGRCMKYCYRWWAWT | 4200 |
| Indonesia-88065 | AYAGRAGRRCRAGRYTGTCKCYCGKRSRCRWRYTYAKRTCYTRAWTRGRCMKYCYRWWAWT | 4200 |
|                 | * . * . * . . * . * * * * . * * * * * * * * * *               |      |
| Bhutan-09015    | GCCGCCRTRYKGRTRCGWRRCYRGRGYWTRTWSARSYTKWYARKWAKCMKKRSAYMYRYKM | 4260 |
| Bhutan-09024    | GCCGCCRTRYTGTTRCGWRRCYRGRGYWTRTWSARSYTKWYARKWAKCMKKRSAYMYRYKM | 4260 |
| Bhutan-09027    | GCCGCCRTRYKGRTRCGWRRCYRGRGYWTRTWSARSYTKWYARKWAKCMKKRSAYMYRYKM | 4260 |
| Bhutan-09030    | GCCGCCRTRYKGRTRCGWRRCYRGRGYWTRTWSAGSYTKWYARKWAKCMKKRSAYMYRYKM | 4260 |
| Bhutan-09005    | AACKKYRCKRCRYRYSAGSTRRTRSTWAKWCMACTYGWTRGTTMGGAGTGCRTCTACGM   | 4260 |
| Indonesia-88035 | AACKKYRYRTRCRYRYSAGSTRRTRSTWAKWCMACTYGWTRGTTMGGAGTGCRTCTACGM  | 4260 |
| Indonesia-88045 | AACKKYRYRTRCRYRYSAGSTRRTRSTWAKWCMACTYGWTRGTTMGGAGTGCRTCTACGM  | 4260 |
| Indonesia-88065 | AAYKKYRYRTRCRYRYSAGSTRRTRSTWAKWCMACTYGWTRGTTMGGAGTGCRTCTACGM  | 4260 |
|                 | . . * . * . . * . * . * . * . . * . . . * . . . *             |      |
| Bhutan-09015    | RSMMARCYRTRKRYTSTMTSYCYWRWKGYMICYAWGCTATTRTGMRRYKRRSMYRSRYAK  | 4320 |
| Bhutan-09024    | RSMMARSYRTRKRYTSTMTSYCYWRWKGYMICYAWGCTATTRTGMRRYKRRSMYRSRYAK  | 4320 |
| Bhutan-09027    | RSMMARSYRTRKRYTSTMTSYCYWRWKGYMICYAWGCTATTRTGMRRYKRRSMYRSRYAK  | 4320 |
| Bhutan-09030    | RSMMARCTRTRKRYTSTMTSYCYWRWKGYMICYAWGCTATTRTGMRRYKRRSMYRSRYAK  | 4320 |
| Bhutan-09005    | GSCACAGCGYKTAAYSICYSTYTAATKRTCYYCWRTYWAAACKMRCTGRAGCCASGYCK   | 4320 |
| Indonesia-88035 | GSCACAGCGYKTAAYSICYSTYTAATKRTCYYCWRTYWAAACKMRCTGRAGCCASGYCK   | 4320 |
| Indonesia-88045 | GSCACAGCGYKTAAYSICYSTYTAATKRTCYYCWRTYWAAACKMRCTGRAGCCASGYCK   | 4320 |
| Indonesia-88065 | GSCACAGCGYKTAAYSICYSTYTAATKRTCYYCWRTYWAAACKMRCTGRAGCCASGYCK   | 4320 |
|                 | * . * * * * * * * * * * * * * * * * * * * * * * * *           |      |
| Bhutan-09015    | SARCTAWSRTRGRYKCRYWMCWWWKTGYRWRRYACYMAYGYRYSYWMYWTTRGRRKCY    | 4380 |
| Bhutan-09024    | SARCTAWSRTRGRYKCRYWMCWWWKTGYRWRRYACYMAYGYRYSYWMYWTTRGRRKCY    | 4380 |
| Bhutan-09027    | SARCTAWSRTRGRYKCRYWMCWWWKTGYRWRRYACYMAYGYRYSYWMYWTTRGRRKCY    | 4380 |
| Bhutan-09030    | SARCTAWSRTRGRYKCRYWMCWWWKTGYRWRRYACYMAYGYRYSYWMYWTTRGRRKCY    | 4380 |
| Bhutan-09005    | SCATYRWSWRRRYTTRYACATTAKYKTGWGRYRYCACATGTGRSGTTATAKKRRAATYY   | 4380 |
| Indonesia-88035 | SCATYRWSWRRRYTTRYACATTAKYKTGWGRYRYCACAYRYGTRSGTTATAKKRRAATYY  | 4380 |
| Indonesia-88045 | SCATYRWSWRRRYTTRYACATTAKYKTGWGRYRYCACRYRYGTRSGTTATAKKRRAATYY  | 4380 |
| Indonesia-88065 | SCATYRWSWRRRYTTRYACATTAKYKTGWGRYRYCACRYRYGTRSGTTATAKKRRAATYY  | 4380 |
|                 | * . * * * * * . * * * * * * * * * * * * * * * * * *           |      |
| Bhutan-09015    | RRGRWTKATRRCAAYACWAYCCMRRYMYCYRAYCAYTYTYSRACYYARTGWCWRKAYKA   | 4440 |
| Bhutan-09024    | RRGRWTKATRRCAAYACWAYCCMRRYMYCYRAYCAYTYTYSRACYYARTGWCWRKAYKA   | 4440 |
| Bhutan-09027    | RRGRWTKATRRCAAYACWAYCCMRRYMYCYRAYCAYTYTYSRACYYARTGWCWRKAYKA   | 4440 |
| Bhutan-09030    | RRGRWTKATRRCAAYACWAYCCMRRYMYCYRAYCAYTYTYSRACYYARTGWCWRKAYKA   | 4440 |
| Bhutan-09005    | AAARTYTRYRGRSRYRRCYMMGRYMYCAGCYRYTYGYGAGGYYYWRWRWYTRGKRCR     | 4440 |
| Indonesia-88035 | AAARTYTRYRGRSRYRRCYMMGRYMYCAGCYRYTYGYGAGGYYYWRWRWYTRGKRCR     | 4440 |
| Indonesia-88045 | AAARTYTRYRGRSRYRRCYMMGRYMYCAGCYRYTYGYGAGGYYYWRWRWYTRGKRCR     | 4440 |
| Indonesia-88065 | AAARTYTRYRGRSRYRRCYMMGRYMYCAGCYRYTYGYGAGGYYYWRWRWYTRGKRCR     | 4440 |
|                 | . * . * . * * * * * . * * . * * * * * * * *                   |      |
| Bhutan-09015    | MMYAGCYKSCWTTACAAYYGATCRCCAYYRRGRCTTTTCWCYRYMWTAYTMRWWCGYKA   | 4500 |
| Bhutan-09024    | MMYAGCYKSCWTTACAAYYGATCRCCAYYRRGRCTTTTCWCYRYMWTAYTMRWWCGYKA   | 4500 |
| Bhutan-09027    | MMYAGCYKSCWTTACAAYYGATCRCCAYYRRGRCTTTTCWCYRYMWTAYTMRWWCGYKA   | 4500 |
| Bhutan-09030    | MMYAGCYKSCWTTACAAYYGATCRCCAYYRRGRCTTTTCWCYRYMWTAYTMRWWCGYKA   | 4500 |
| Bhutan-09005    | MMYRSYCTGSAYYAMWGTTSRYRWTTRCYGGKGCTYKWSWYCGCWYRYCAAWATRCTT    | 4500 |
| Indonesia-88035 | MMYRSYCTGSAYYAMWGTTSRYRWTTRCYGGKGCTYKWSWYCGCWYRYCAAWATRCTT    | 4500 |
| Indonesia-88045 | MMYRSYCTGSAYYAMWGTTSRYRWTTRCYGGKGCTYKWSWYCGCWYRYCAAWATRCTT    | 4500 |
| Indonesia-88065 | MMYRSYCTGSAYYAMWGTTSRYRWTTRCYGGKGCTYKWSWYCGCWYRYCAAWATRCTT    | 4500 |
|                 | *** . . . . . * * . . * * * * * . :                           |      |

|                 |                                                                |      |
|-----------------|----------------------------------------------------------------|------|
| Bhutan-09015    | RYTMYGWRAGAWCSAAWYGRMWGRRRRYYKMGMYYYTRGYGTCARRTGKYKYGYGSCAC    | 4560 |
| Bhutan-09024    | RYTMYGWRAGAWCSAAWYGRMWGRRRRYYKMGMYYYTRGYGTCARRTGKYKYGYGSCAC    | 4560 |
| Bhutan-09027    | RYTMYGWRAGAWCSAAWYGRMWGRRRRYYKMGMYYYTRGYGTCARRTGKYKYGYGSCAC    | 4560 |
| Bhutan-09030    | RYTMYGWRAGAWCSAAWYGRMWGRRRRYYKMGMYYYTRGYGTCARRTGKYKYGYGSCAC    | 4560 |
| Bhutan-09005    | ATCCTKWRAGAGRYCTRTYAAATSRGACTTKMRACTCWGSYYRCYRGRAKYTCSCRCYRC   | 4560 |
| Indonesia-88035 | ATCCTKWRAGAGRYCTATYAAATSRGACTTKMRACTCWGSYYRCYRGRAKYTCSCRCAM    | 4560 |
| Indonesia-88045 | ATCCTKWRAGAGRYCTATYAAATSRGACTTKMRACTCWGSYYRCYRGRAKYTCSCRCAM    | 4560 |
| Indonesia-88065 | ATCCTKWRAGAGRYCTRTYAAATSRGACTTKMRACTCWGSYYRCYRGRAKYTCSCRCYRM   | 4560 |
|                 | * . . . . : * . . * ** . ** * : * . . .                        |      |
| Bhutan-09015    | AYAYYTKYYGCKGGTAGTMTSYGGRKKTAGCGYYRRTGRTGTYRARBWTCAGYKACTTRR   | 4620 |
| Bhutan-09024    | AYAYYTKYYGCKGGTAGTMTSYGGRKKTAGCGYYRRTGRTGTYRARBWTCAGYKACTTRR   | 4620 |
| Bhutan-09027    | AYAYYTKYYGCKGGTAGTMTSYGGRKKTAGCGYYRRTGRTGTYRARBWTCAGYKACTTRR   | 4620 |
| Bhutan-09030    | AYAYYTKYYGCKGGTAGTMTSYGGRKKTAGCGYYRRTGRTGTYRARBWTCAGYKACTTRR   | 4620 |
| Bhutan-09005    | AYRYCKKCCRTGCAYRAYKAKGCRATTYCRYATCGGTGRKRYTABRRTCTGATGRTWGRG   | 4620 |
| Indonesia-88035 | RYRYCKKCCRTGCAYRAYKAKGCRATTYCRYATCGGTGRKRYTABRRTCTGATGRTWGRG   | 4620 |
| Indonesia-88045 | RYRYCKKCCRTGCAYRAYKAKGCRATTYCRYATCGGTGRKRYTABRRTCTGATGRTWGRG   | 4620 |
| Indonesia-88065 | RYRYCKKCCRTGCAYRAYKAKGCRATTYCRYATCGGTGRKRYTABRRTCTGATGRTWGRG   | 4620 |
|                 | * * . * . . . . . . . . . * . * . . *                          |      |
| Bhutan-09015    | YYRYGTGTTASTTCRARYWYCGGRYRCYGTTCMMYCRITTCAMRWASYYRKYRYGRCCR    | 4680 |
| Bhutan-09024    | YYRYGTGTTASTTCRARYWYCGGRYRCYGTTCMMYCRITTCAMRWASYYRKYRYGRCCR    | 4680 |
| Bhutan-09027    | YYRYGTGTTASTTCRARYWYCGGRYRCYGTTCMMYCRITTCAMRWASYYRKYRYGRCCR    | 4680 |
| Bhutan-09030    | YYRYGTGTTASTTCRARYWYCGGRYRCYGTTCMMYCRITTCAMRWASYYRKYRYGRCCR    | 4680 |
| Bhutan-09005    | TYGTRKAYWCCGYMARRTWYRGGKAYCRYCYCCYRYTMMARTWCYAAKTCACRAGMSG     | 4680 |
| Indonesia-88035 | TYGTRKAYWCCGYMARRTWYRGGKAYCRYCYCCYRYTMMARTWCYAAKTCACRAGMSG     | 4680 |
| Indonesia-88045 | TYGTRKAYWCCGYMARRTWYRGGKAYCRYCYCCYRYTMMARTWCYAAKTCACRAGMSG     | 4680 |
| Indonesia-88065 | TYGTRKAYWCCGYMARRTWYRGGKAYCRYCYCCYRYTMMARTWCYAAKTCACRAGMSG     | 4680 |
|                 | * . . . . * * * * * * * . * * *                                |      |
| Bhutan-09015    | YCRCYAGCTTCKAWGARTTCYACTTYTRRYAASTCTCWYYCARYKARSRRACCTMCTYKR   | 4740 |
| Bhutan-09024    | YCRCYAGCTTCKAWGARTTCYACTTYTRRYAASTCTCWYYCARYKARSRRACCTMCTYKR   | 4740 |
| Bhutan-09027    | YCRCYAGCTTCKAWGARTTCYACTTYTRRYAASTCTCWYYCARYKARSRRACCTMCTYKR   | 4740 |
| Bhutan-09030    | YCRCYAGCTTCKAWGARTTCYACTTYTRRYAASTCTCWYYCARYKARSRRACCTMCTYKR   | 4740 |
| Bhutan-09005    | TYAYTWKYACTKWASMRGWSCWYWYWGWCWGCWYKYTCYRGRYKRSRRWMMYCMKTKA     | 4740 |
| Indonesia-88035 | TYAYTWKYACTKWASMRGWSCWYWYWGWCWGCWYKYKYCYCRRYKRSRRWMMYCMKTKA    | 4740 |
| Indonesia-88045 | TYAYTWKYACTKWASMRGWSCWYWYWGWCWGCWYKYKYCYCRRYKRSRRWMMYCMKTKA    | 4740 |
| Indonesia-88065 | TYAYTWKYACTKWASMRGWSCWYWYWGWCWGCWYKYTCYRGRYKRSRRWMMYCMKTKA     | 4740 |
|                 | : * . * . * . . * * * * * . *                                  |      |
| Bhutan-09015    | RCGACASKGMMGSYSRRTTGGRRTTYCGWWARKKSMYTRCYRGGRMWKSYSCTMCRGAWWYR | 4800 |
| Bhutan-09024    | RCGACASKGMMGSYSRRTTGGRRTTYCGWWARKKSMYTRCYRGGRMWKSYSCTMCRGAWWYR | 4800 |
| Bhutan-09027    | RCGACASKGMMGSYSRRTTGGRRTTYCGWWARKKSMYTRCYRGGRMWKSYSCTMCRGAWWYR | 4800 |
| Bhutan-09030    | RCGACASKGMMGSYSRRTTGGRRTTYCGWWARKKSMYTRCYRGGRMWKSYSCTMCRGAWWYR | 4800 |
| Bhutan-09005    | GMRMSRGKTMMRGCCRKYRGRYKCGKATGGKCMCKGYTGKRGAWWGTMWAYGRMTWYA     | 4800 |
| Indonesia-88035 | GMRMSRGKTMMRGCCRKYRGRYKCGKATGGKCMCKGYTGKRGAWWGTMWAYGRMTWYA     | 4800 |
| Indonesia-88045 | GMRMSRGKTMMRGCCRKYRGRYKCGKATGGKCMCKGYTGKRGAWWGTMWAYGRMTWYA     | 4800 |
| Indonesia-88065 | GMRMSRGKTMMRGCCRKYRGRYKCGKATGGKCMCKGYTGKRGAWWGTMWAYGRMTWYA     | 4800 |
|                 | . . * * * . . * . . . * . * . * *                              |      |
| Bhutan-09015    | YGTAARTSGSGRMCTTAMARTWKRWYTTGRWCCAYAGGARTRTTARYCMAYKYAGYYTA    | 4860 |
| Bhutan-09024    | YGTAARTSGSGRMCTTAMARTWKRWYTTGRWCCAYAGGARTRTTARYCMAYKYAGCYTA    | 4860 |
| Bhutan-09027    | YGTAARTSGSGRMCTTAMARTWKRWYTTGRWCCAYWSSARTRTTARYCMAYKYAGYYTA    | 4860 |
| Bhutan-09030    | YGTAARTSGSGRMCTTAMARTWKRWYTTGRWCCAYAGGARTRTTARYCMAYKYAGYYTA    | 4860 |

Bhutan-09005 YRKGTAKCSGRGMYGKTCGAGYAGRACCCSRWTMYRTAGGGRYGYGAGYACRCGTMGCYWM 4860  
Indonesia-88035 YRKGTAKCSGRGMYGKTCGAGYAGRACCCSRWTMYRTWSSRRYGYGRGYCCRCGTMKCYWM 4860  
Indonesia-88045 YRKGTAKCSGRGMYGKTCGAGYAGRACCCSRWTMYRTWSSRRYGYGRGYCCRCGTMGCYWM 4860  
Indonesia-88065 YRKGTAKCSGGGMYGKTCGAGYAGRACCCSRWTMYRTAGGGRYGYGAGYACRCGTMGCYWM 4860  
\* ..: .... \* .: . \* .\*\* .. \* \* . \*

Bhutan-09015 CYRAKMRYRWRRARAAC TTWGYKYCGYGAMRAKAAAMYRKATATCKWTCKWRTGTGTGR 4920  
Bhutan-09024 CYRAKMRYRTGAARAAC TTWGYKYCGYGAMRAKAAAMYRKATATCKWTCKWRTGTGTGR 4920  
Bhutan-09027 CYRAKMRYRWRRARAAC TTWGYKYCGYGAMRAKAAAMYRKATATCKWTCKWRTGTGTGR 4920  
Bhutan-09030 CYRAKMRYRTGAAGAAC TTWGYKYCGYGAMRAKAAAMYRKATATCKWTCKWRTGTGTGR 4920  
Bhutan-09005 YYRRTAAC TAAARAWWYCCARTTCYRCRCARKRRRAYATGYCYMTTKYKWRKRYRYGG 4920  
Indonesia-88035 YYRRTAAC TAAARATTTCCARTTCYRCRCARGRRRAYATGYCYMTTKYKWRKRYRYRG 4920  
Indonesia-88045 YYRRTAAC TAAARATTTCCAATTCYRCRCARGRRRAYATGCCCMTTTTYKWRKRYRTRG 4920  
Indonesia-88065 YYRRTAAC TAAARATTYCCARTTCYRCRCARKRRRAYATGCCCMTTTTYKWRKRYRYRG 4920  
\*\* . . \* . . . . . \*\*\*.

Bhutan-09015 TRCYKWRWTRKYYYRRTARWYKRTCWYCC TAWWRWASARMAWMCGCCSWSRGTYC 4980  
Bhutan-09024 TRCYKWRWTRKYYYRRTARWYKRTCWYCC TAWWRWASARMAWMCGCCSWSRGTYC 4980  
Bhutan-09027 TRCYKWRWTRKYYYRRTARWYKRTCWYCC TAWWRWASARMAWMCGCCSWSRGTYC 4980  
Bhutan-09030 TRCYKWRWTRKYYYRRTARWYKRTCWYCC TAWWRWASARMAWMCGCCSWSRGTYC 4980  
Bhutan-09005 YGYCTWRWYAKYYYARKRGWYTTKTRYTWY TGGYTWWRWRCRGMRTAASRYSGWSGWWCY 4980  
Indonesia-88035 YGYCTWRWYAKYYYARKRGWYTTKTRYTWY TGGYTWWRWRCRGMRTAASRYSGWSGWWCY 4980  
Indonesia-88045 YGYCTWRWYAKYYYARKRGWYTTKTRYTWY TGGYTWWRWRCRGMRTAASRYSGWSGWWCY 4980  
Indonesia-88065 YGYCTWRWYAKYYYARKRGWYTTKTRYTWY TGGYTWWRWRCRGMRTAASRYSGWSGWWCY 4980  
.\*\*\* \*\*\*\* \* . \*\* \* . \* \* :\*\*\*\* . \* . . .\*\*

Bhutan-09015 KYGMTAWWTARRMCKCMYGRWATGSWYCM AATYYYGGTYGYRRYKARRWYCWYKARGGG 5040  
Bhutan-09024 KYGMTAWWTARRMCKCMYGRWATGSWYCM AATYYYGGTYGYRRYKARRWYCWYKARGGG 5040  
Bhutan-09027 KYGMTAWWYARRMCKCMYGRWATGSWYCM AATYYYGGTYGYRRYKARRWYCWYKARGGG 5040  
Bhutan-09030 KYGMTAWWYARRMCKCMYGRWATGSWYCM AATYYYGGTYGYRRYKARRWYCWYKARGGG 5040  
Bhutan-09005 KTRAYRAWCWAGAGTTCTRRAGYAGWTS MRRCCTAAYCRYGGYKTAACCTTCTGWASTR 5040  
Indonesia-88035 GTRAYRAWCWAGAGTTCTRRAGYAGWTS MRRCCTAAYCRYGGYKTAACCTTCTGWASTR 5040  
Indonesia-88045 KTRAYRAWCWAGAGTTCTRRAGYAGWTS MRRCCTAAYCRYGGYKTAACCTTCTGWASTR 5040  
Indonesia-88065 GTRAYRAWCAAGAGTTCTRRAGYAGWTS MRRCCTAAYCRYGGYKTAACCTTCTGWASTR 5040  
\* . . \* . . . \* . . . \* \*\*:

Bhutan-09015 WRGGGYGKMKRGKWAMAWRWKYAGR WGWAMSGRMTRTSRGWAWCGYRATARAGTWCYGYG 5100  
Bhutan-09024 WRGGGYGKMKRGKWAMAWRWKYAGR WGWAMSGRMTRTSRGWAWCGYRATARAGTWCYGYG 5100  
Bhutan-09027 WRGGGYGKMKRGKWAMAWRWKYAGR WGWAMSGRMTRTSRGWAWCGYRATARAGTWCYGYG 5100  
Bhutan-09030 WRGGGYGKMKRGKWAMAWRWKYAGR WGWAMSGRMTRTSRGWAWCGYRATARAGTWCYGYG 5100  
Bhutan-09005 WGRRKYKKCGAAGATMGWR TTYRSAAGAMMYRAMARYGGATRTYRTGRTGACWYKYTR 5100  
Indonesia-88035 WGRRKYKKCGAAGATMGWR TTYRSAARAMMYRAMARYGGATRTYRTGRTGACWYKYTR 5100  
Indonesia-88045 WGRRKYKKCGAAGATCGWR TTYRSAARAMMYRAMARYGGATRTYRTGRTGACWYKYTR 5100  
Indonesia-88065 WGRRKYKKCGAAGATMGWR TTYRSAAGAMMYRAMARYGGATRTYRTGRTGACWYKYTR 5100  
\* \* \* . : .\*\* . \* . \* \* . . :\*.. \* \*

Bhutan-09015 CYKGTGAGCTCCGTAYYWRGCRSCGCACRYKYAWAYCGRRWAGCYRAASWTWTGSARYYY 5160  
Bhutan-09024 CYKGTGAGCTCCGTAYYWRGCRSCGCACRYKYAWAYCGRRWAGCYRAASWTWTGSARYYY 5160  
Bhutan-09027 CYKGTGAGCTCCGTAYYWRGCRSCGCACRYKYAWAYCGRRWAGCYRAASWTWTGSARYYY 5160  
Bhutan-09030 CYKGTGAGCTCCGTAYYWRGCRSCGCACRYKYAWAYCGRRWAGCYRAASWTWTGSARYYY 5160  
Bhutan-09005 YCTACRASYYTYKYWYCYTGGYRCYAYRMATTTWAACGASGWMCYATASAKTYSCRGTTT 5160  
Indonesia-88035 YCTRCRAGCTTYKYACYTGAYRCYAYRMATTTWAWCGRSGWMCYATASAKTYSCRGTTT 5160  
Indonesia-88045 YCTRCRWGCTTYKYACYTGAYRCYAYRMATTTWAWCGRSGWMCYATASAKTYSCRGTTT 5160  
Indonesia-88065 YCTRCRASYYTYKYWYCYTGGYRCYAYRMATTTWAACGASGWMCYATASAKTYSCRGTTT 5160

. . . \* . \* . . . \* \* : \* . . .

Bhutan-09015 WRMYGGKMTYTAGYGYRSRAGYRCCWCARYWGTMYRGYWYATGTRCCWYGRCCYKYKG 5220  
 Bhutan-09024 TGM YGGKMTYTAGYGYRSRAGYRCCWCARYWGTMYRGYWYATGTRCCWYGRCCYKYKG 5220  
 Bhutan-09027 WRMYGGKMTYTAGYGYRSRAGYRCCWCARYWGTMYRGYWYATGTRCCWYGRCCYKYKG 5220  
 Bhutan-09030 WRMYGGKMTYTAGYGYRSRAGYRCCWCARYWGTMYRGYWYATGTRCCWYGRCCYKYKG 5220  
 Bhutan-09005 WGCCAARKMWYR RYRTRSGRRYAYYTT RRYASKYAATTYWGTGYAYYTTCKGYCGGTT 5220  
 Indonesia-88035 WGCCAARKMWYR RYRTRSGRRYAYYTT RRYASKYAATTYWKSAYAYYTTCKGYCGGTT 5220  
 Indonesia-88045 WGCCAARKMWYR RYRTRSGRRYAYYTT RRYASKYAATTYWKSAYAYYTTCKGYCGGTT 5220  
 Indonesia-88065 WGCCAARKMWYR RYRTRSGRRYAYYTT RRYASKYAATTYWGTGYAYYTTCKGYCGGTT 5220

. . \* \* \* \* \* \* \* \* . . \* . \* . . .

Bhutan-09015 AAWMSTSAWYGMRCRTTTYGATRWRASATARYSCTGAWRRASACKCGATRKRKTWRTGGR 5280  
 Bhutan-09024 AAWMSTSAWYGMRCRTTTYGATRWRASATARYSCTGAWRAASACKCGATRKRKTWRTGGR 5280  
 Bhutan-09027 AAWMSTSAWYGMRCRTTTYGATRWRASATARYSCTGAAAAASACKCGATRKRKTWRTGGR 5280  
 Bhutan-09030 AAWMSTSAWYGMRCRTTTYGATRWRASATARYSCTGAAAAASACKCGATRKRKTWRTGGR 5280  
 Bhutan-09005 WTWMGYGWATKAGTRYYYTCRGAGTGRGWKRACGYCRAAGTGWMTGGRYGAGTWGCKAR 5280  
 Indonesia-88035 WTWMGYGWATKAGTRYYYTCRGAGTGRGWKRACGYCRAAGTGACTGRRYGAGYWGCKAR 5280  
 Indonesia-88045 WTWMGYGWATKAGTRYYYTCRGAGTGGGWKRACGYCRAAGTGACTGRRYGAGYWGCKAR 5280  
 Indonesia-88065 WTWMGYGWATKAGTRYYYTCRGAGTGRGWKRACGYCRAAGTGACTGGRYGAGTWGCKAR 5280

: \* . . \* . . . : . . . \* . \*

Bhutan-09015 AKRKT SCTY CASMRRRYCMRYKTMRRAMRGYYKCYRWC TTRARS GMWRWGM MT TWYRM 5340  
 Bhutan-09024 AKRKT SCTY CASMRRRYCMRYKTMRRAMRGYYKCYRWC TTRARS GMWRWGM MT TWYRM 5340  
 Bhutan-09027 AKRKT SCTY CASMRRRYCMRYKTMRRAMRGYYKCYRWC TTRARS GMWRWGM MT TWYRM 5340  
 Bhutan-09030 AKRKT SCTY CASMRRRYCMRYKTMRRAMRGYYKCYRWC TTRARS GMWRWGM MT TWYRM 5340  
 Bhutan-09005 MGR TYGCY YMACMGAGCYCGT TGMRRWCRSTCTKSTRYYTRWAGRAATGRMCCGTCRC 5340  
 Indonesia-88035 MGATYGSYYARCMGAGCYCGT TGMRRWCRSTTTCTRTYYWRWAGRAATGRMCCGWCRC 5340  
 Indonesia-88045 MGATYGSYYARCMGAGCTCGT TGMRRWCRSTTTCTRTYYWRWAGRAATGRMCCGWCRC 5340  
 Indonesia-88065 MGR TYGCY YMACMGAGCYCGT TGMRRWCRSTCTKSTRYYTRWAGRAATGRMCCGTCRC 5340

. . . \* . \* \* \* \* . . . \* \* . \* \* . \*

Bhutan-09015 YAMCCAYWMWRMWCYRARSRYKTYMTGSTGAGACYKGAWRYAGGRGAR RCTARCSCTA 5400  
 Bhutan-09024 YAMCCAYWMWRMWCYRARSRYKTYMTGSTGAGACYKGAWRYAGGRGAR RCTARCSCTA 5400  
 Bhutan-09027 YAMCCAYWMWRMWCYTAARSRYKTYMTGSTGAGACYKGAWRYAGGRGAR RCTARCSCTA 5400  
 Bhutan-09030 YAMCCAYWMWRMWCYRARSRYKTYMTGSTGAGACYKGAWRYAGGRGAR RCTARCSCTA 5400  
 Bhutan-09005 TAM Y YATWCAAAAMTCYR RSRYYKYCYKSCRRARSYTSRARCRRRRRRRTCGGM CYYA 5400  
 Indonesia-88035 TMM Y YRTWCAAAAAAYR RSRYYKYCYKSCRRARSYTSRARCRRRRRRRTCGRCGCCR 5400  
 Indonesia-88045 TMM Y YRTWCAAAAAAYR RSRYYTYCYKSCRRARSYTSRARCRRRRRRRTCGRCGCCR 5400  
 Indonesia-88065 TAM Y YATWCAAAAMTCYR RSRYYKYCYKSCRRARSYTSRARCRRRRRRRTCGGM CYYA 5400

\* \* . \* \* \* \* \* . . \* \* \* \* .

Bhutan-09015 TGAWSTARAGYTYG CYCRKMATA TYSRTCTTACRRYCRYKYAYTMWATTMATWCMRRG 5460  
 Bhutan-09024 TGAWSTARAGYTYG CYCRKMATA TYSRTCTTACRRYCRYKYAYTMWATTMATWCMRRG 5460  
 Bhutan-09027 TGAWSTARAGYTYG CYCRKMATA TYSRTCTTACRRYCRYKYAYTMWATTMATWCMRRG 5460  
 Bhutan-09030 TGAWSTARAGYTYG CYCRKMATA TYSRTCTTACRRYCRYKYAYTMWATTMATWCMRRG 5460  
 Bhutan-09005 WRWWSWGMGMSYAYYRTCTAGMRYCKYCGWYYRYGAYSGTGT YTCYCTRCKARWWTAGRR 5460  
 Indonesia-88035 WRWWSWGMGASAYYRTCTAGMRYCKYCGWYYRYGAYSGTGT YTCYCTRCKARWWTAGRR 5460  
 Indonesia-88045 WRWWSWGMGASTAYYRTCTAGMRYCKYCGWYYRYGAYSGTGT YTCYCTRCKARWWTAGRR 5460  
 Indonesia-88065 WRWWSWGMGMSYAYYRTCTAGMRYCKYCGWYYRYGAYSGTGT YTCYCTRCKARWWTAGRR 5460

\* . . : \* \* \* . . \* . \* : . \* \*

Bhutan-09015 CARAYCTWKKRTRCRKWTGTTYRMYRYWSRAARRRYRYRGARTCYGMCRCTSTWGRYT 5520  
 Bhutan-09024 CARAYCTWKKRTRCRKWTGTTYRMYRYWSRAARRRYRYRGARTCYGMCRCTSTWGRYT 5520

Bhutan-09027 CARAYCTWKKRTRCRKRWYTGTTYRMYRYRWSRAARRRYRYRGARTCYGMCRCSTSTWGRYT 5520

Bhutan-09030 CARAYCTWKKRTRCRKRWYTGTTYRMYRYRWSRAARRRYRYRGARTCYGMCRCSTSTWGRYT 5520

Bhutan-09005 CARRCYWTTKRCTRAKTYYSYKTRCYTAYTGAGRGAATYATRMGKYIYAMYGSKSYTRACW 5520

Indonesia-88035 YRRRCYWTTKRTRAKTYYSYKTRCYTAYTGAGRGAATYATRMGKYIYAMYGSKSYTRACW 5520

Indonesia-88045 YRRRCYWTTKRTRAKTYYSYKTRCYTAYTGAGRGAATYATRMGKYIYAMYGSKSYTRACW 5520

Indonesia-88065 YRRRCYWTTKRCTRAKTYYSYKTRCYTAYTGAGRGAATYATRMGKYIYAMYGSKSYTRACW 5520

\* . \*\* \* \* \* . . \* \* . . \* . . \* . \* . \*

Bhutan-09015 TWYGWRTSAKYRWCRSWKTAACAGKRYRGRGCTTTMGCTYYRAYRAGCTATCCRMCT 5580

Bhutan-09024 TWYGWRTSAKYRWCRSWKTAACAGKRYRGRGCTTTMGCTYYRAYRAGCTATCCRMCT 5580

Bhutan-09027 TWYGWRTSAKYRWCRSWKTAACAGKRYRGRGCTTTMGCTYYRAYRAGCTATCCRMCK 5580

Bhutan-09030 TWYGWRTSAKYRWCRSWKTAACAGKRYRGRGCTTKMSSTYYRAYRAGCTATCCRMCK 5580

Bhutan-09005 KWYCARYCRCTCGTCACTGYGWMGTRYTRRRATYWTGCGCTTRWCCRRRMYRYGARACYK 5580

Indonesia-88035 KWYCARYCRCTCGTCACTGYGWMGTRYTRRRATYWTGCGCTTRWCCRRRMYRYGARACCT 5580

Indonesia-88045 KWYCARYCRCTCGTCACTGYGWMGTRYTRRRATYWTGCGCTTRWCCRRRMYRYGARACCT 5580

Indonesia-88065 KWYCARYCRCTCGTCACTGYGWMGTRYTRRRATYWTGCGCTTRWCCRRRMYRYGARACYK 5580

. \*\* \* . . . . . . . . . . . . . . . \* \* . \* . \*

Bhutan-09015 AYARTRYRWWAMYRWKAAYYMACWRYRWRGSSYYRMGRRYMYTRAWRSRRTGYGYTYS 5640

Bhutan-09024 AYARTRYRWWAMYRWKAAYYMACWRYRWRGSSYYRMGRRYMYTRAWRSRRTGYGYTYS 5640

Bhutan-09027 AYARTRYRWWAMYRWKAAYYMACWRYRWRGSSYYRMGRRYMYTRAWRSRRTGYGYTYS 5640

Bhutan-09030 AYARTRYRWWAMYRWKAAYYMACWRYRWRGSSYYRMGRRYMYTRAWRSRRTGYGYTYS 5640

Bhutan-09005 RCMRGGTGATMATGATRCYYCCTGWACGGWCTCRCAGAYCMCCGRWRGAAYATTAKYSY 5640

Indonesia-88035 RCMRGGTGATMATGATRCYYCCTGWACGGWCTCRCAGAYCMCCGRWRGAAYATTAKYSY 5640

Indonesia-88045 RCMRGGTGATMATGATRCYYCCTGWACGGWCTCRCAGAYCMCCGRWRGAAYATTAKYSY 5640

Indonesia-88065 RCMRGGTGATMATGATRCYYCCTGWACGGWCTCRCAGAYCMCCGRWRGAAYATTAKYSY 5640

\* . . . . . . . . . . . . . . . \* \* . \* . \*

Bhutan-09015 YCCCTAMCYRACYRYRATCRKRYGSMWKACCCAYRAKMCAMTTCCYAMMYCCTAYRY 5700

Bhutan-09024 YCCCTAMCYRACYRYRATCRKRYGSMWKACCCAYRAKMCAMTTCCYAMMYCCTAYRY 5700

Bhutan-09027 YCCCTAMCYRACYRYRATCRKRYGSMWKACCCAYRAKMCAMTTCCYAMMYCCTAYRY 5700

Bhutan-09030 YCCCTAMCYRACYRYRATCRKRYGSMWKACCCAYRAKMCAMTTCCYAMMYCCTAYRY 5700

Bhutan-09005 YTCYCTMSTCRWYRCRMTRYGRRRTASAATYYCGYGATMCACYCTTCWMMCYYYWYGY 5700

Indonesia-88035 YTSYCTMSTCGWYRCRMTRYGRRRTASAATYYCGYGATMCACYCTTCWMMCYYYWYGY 5700

Indonesia-88045 YTSYCTMSTCGWYRCRMTRYGRRRTASAATYYCGYGATMCACYCTTCWMMCYYYWYGY 5700

Indonesia-88065 YTCYCTMSTCRWYRCRMTRYGRRRTASAATYYCGYGATMCACYCTTCWCCCYYYWYGY 5700

\* . : \* . \*\* \* . \* . \* . : . \* . \* . \*\*

Bhutan-09015 CYTRGYRRTSYGCMYKRTGRGYAYTRTAYTTASGYRCGYAAGWSSGSRWRCRMCAAS 5760

Bhutan-09024 CYTRGYRRTSYGCMYKRTGRGYAYTRTAYTTASGYRCGYAARWSSGSRWRCRMCAAS 5760

Bhutan-09027 CYTRGYRRTSYGCMYKRTGRGYAYTRTAYTTASGYRCGYRAGWSSGSRWRCRMCAAS 5760

Bhutan-09030 CYTRGYRRTSYGCMYKRTGRGYAYTRTAYTTAKGYRCGYAAGWSSGSRWRCRMCAAS 5760

Bhutan-09005 STYRRYAGYSTSAAYKRKSRSTRCYAWWYYSRTRYRCAAGWSSGTYRGMTRYRWS 5760

Indonesia-88035 SYRRYAGYSTSAAYKRKSRSTRCYAWWYYSRTRYRCAAGWSSGTYRGMTRYRWS 5760

Indonesia-88045 SYRRYAGYSTSAAYKRKSRSTRCYAWWYYSRTRYRCAAGWSSGTYRGMTRYRWS 5760

Indonesia-88065 STYRRYAGYSTSAAYKRKSRSTRCYAWWYYSRTRYRCAAGWSSGTYRGMTRYRWS 5760

. \* \*\* \* . . \* . . \* . \* \* . . \* \* \*

Bhutan-09015 SKWCARYGSRWAAARWGYTATATGYGKTGRTAMRMAYWCSTYWRYYKMYMRYTCRRACA 5820

Bhutan-09024 SKWCARYGSRWAAARWGYTATATGYGKTGRTAMRMAYWCSTYWRYYKMYMRYTCRRACA 5820

Bhutan-09027 SKWCARYGSRWAAARWGYTATATGYGKTGRTAMRMAYWCSTYWRYYKMYMRYTCRRACA 5820

Bhutan-09030 SKWCARYGSRWAAARWGYTATATGYGKTGRTAMRMAYWCSTYWRYYKMYMRYTCRRACA 5820

Bhutan-09005 CTTYCACAGGWGMRGATYYMYRGKYCRTCKRCRCRMTCASSYYWRTGGCCARYWMRGRYR 5820

Indonesia-88035 CTTYCACAGGWGMRGATYYMYRGKYCRTCKRCRCRMTCASSYYWRTGGCCARYWMRGRGTG 5820

Indonesia-88045 CTTYCACAGGWGMRGATYYMYRGKYCRTCKRCRCRMTCCASSYYWRTGGCCARYWMRGRTG 5820  
Indonesia-88065 CTTYCACAGGWGMRGATYYMYRGKYCRTCKRCRCRMTCCASSYYWRTGGCCARYWMRGRTG 5820  
. . . . \* . \* . \* \*\* : . \* \* \* \* \* \* \*

Bhutan-09015 TRMWYTTTRWYYYRKGKGYRGMGAYTCYKAWMYCMMSAKGRYMTGGGWTGGAYRGSKRA 5880  
Bhutan-09024 TRMWYTTTRWYYYRKGKGYRGMGAYTCYKAWMYCMMSAKGRYMTGGGWTGGAYRGSKRA 5880  
Bhutan-09027 TRMWYTTTRWYYYRKGKGYRGMGAYTCYKAWMYCMMSAKGRYMTGGGWTGGAYRGSKRA 5880  
Bhutan-09030 TRMWYTTTRWYYYRKGKGYRGMGAYTCYKAWMYCMMSAKGRYMTGGGWTGGAYRGSKRA 5880  
Bhutan-09005 CGCAACYWRAWTYCRKSTTCRKMRMYCYCGWTCTSAACCWKTRYMYACRTYKRMTAGSKGR 5880  
Indonesia-88035 CGCAACYWRAWTYCRKSTTCRKMRMYCYCGWTCTSAACCWKTRYMYACRTYKRMTAGSKGR 5880  
Indonesia-88045 CGCAACYWRAWTYCRKSTTCRKMRMYCYCGWTCTSAACCWKTRYMYACRTYKRATATSKGR 5880  
Indonesia-88065 CGCAACYWRAWTYCRKSTTCRKMRMYCYCGWTCTSAACCWKTRYMYACRTYKRMTAGSKGR 5880  
: \* \* \* \* \* . \* \* \* . . \* \* \* \* . \*\*

Bhutan-09015 YWTMKRTMWCGRRKRCYRKGKGMCCWSMTGRAWTWGCKWTTAWGRGYRYAWRAAMWCRARC 5940  
Bhutan-09024 YWTMKRTMWCGRRKRCYRKGKGMCCWSMTGRAWTWGCKWTTAWGRGYRYAWRAAMWCRARC 5940  
Bhutan-09027 YWTMKRTMWCGRRKRCYRKGKGMCCWSMTGRAWTWGCKWTTAWGRGYRYAWRAAMWCRARC 5940  
Bhutan-09030 YWTMKRTMWCGRRKRCYRKGKGMCCWSMTGRAWTWGCKWTTAWGRGYRYAWRAAMWCRARC 5940  
Bhutan-09005 CWYCGGWWCWYSRRKRYRKRSMYTGAYARRWCWRTKWAATARGRYAYRTRWCAMGCGS 5940  
Indonesia-88035 CWYCGGWWCWYSRRKRYRKRSMYTGAYARRWCWRTKWAATARGRYAYRTRWCAMGCGS 5940  
Indonesia-88045 CWYCGGWWCWYSRRKRYRKRSMYTGAYARRWCWRTKWAATARGRYAYRTRWCAMGCGS 5940  
Indonesia-88065 CWYCGGWWCWYSRRKRYRKRSMYTGAYARRWCWRTKWAATARGRYAYRTRWCAMGCGS 5940  
\* \* . \* \* \* \* \* . \* . . \* \* \* \* \* \* : : \* \* \* . .

Bhutan-09015 TAGTRGTRKRCWRTYGATRTYAGRGTRRYKYWRTAYTRRRYTRMSYCTRTRCYRGAAMCGYG 6000  
Bhutan-09024 TAGTRGTRKRCWRTYGATRTYAGRGTRRYGTARTAYTRRRYTRMSYCTRTRCYRGAAMCGYG 6000  
Bhutan-09027 TAGTRGTRKRCARTYGATRTYAGRGTRRYKYWRTAYTRRRYTRMSYCTRTRCYRGAAMCGYG 6000  
Bhutan-09030 TAGTRGTRKRCWRTYGATRTYAGRGTRRYKYWRTAYTRRRYTRMSYCTRTRCYRGAAMCGYG 6000  
Bhutan-09005 CRRYRRYKASTRWTARYRYYMRGAYARYGTARTATGAARTWGAGYSWGYYCGRRRCMRTR 6000  
Indonesia-88035 CRRYRRYKASTRWTARYRYYMRGAYARYGTARTATGAARTWGAGYSWGYYCGRRRCMRTR 6000  
Indonesia-88045 CRRYRRYKASTRWTARYRYYMRGAYARYGTARTTTGAARTWGAGYSWGYYCGAGRCMRTR 6000  
Indonesia-88065 CRRYRRYKASTRWTARYRYYMRGAYARYGTARCATGAARTWGAGYSWGYYCGAGRCMRTR 6000  
\* \* . \* . \* \* . \*\* \* : \* . \* .

Bhutan-09015 WYSWMKTWAKYMWSTKMTWYARYWARYTCCWCTRCRMWGMTTTTMRGCAAAAASWACMYR 6060  
Bhutan-09024 WYSWMKTWAKYMWSTKMTWYAAAYWARYTCCWCTRCRMWGMTTTTMRGCAAAAASWACMYR 6060  
Bhutan-09027 WYSWMKTWAKYMWSTGATWYAAAYWARYTCCWCTRCRMWGMTTTTMRGCAAAAASWACMYR 6060  
Bhutan-09030 WYSWMKTWAKYMWSTGATWYAAAYWARYTCCWCTRCRMWGMTTTTMRGCAAAAASWACMYR 6060  
Bhutan-09005 WCGTCKYTTGYAWSYTCYAYGACTTRYWYTYCYRMCWCRCCKYAAASYMWRCRSWWMATS 6060  
Indonesia-88035 WCGTCKYTTGYAWSYTCYAYGACTTRYWYTYMYRMCWCRCCKYAAASYMWRCRSWWMATS 6060  
Indonesia-88045 WCGTCKYTTGYAWSYTCYAYGACTTRYWYTYMYRMCWCRCCKYAAASYMWRCRSWWMATS 6060  
Indonesia-88065 WCGTCKYTTGYAWSYTCYAYGACTTRYWYTYMYRMCWCRCCKYAAASYMWRCRSWWMATS 6060  
\* . \* : \* \* \* \* . : \*\* \* \* . . . \*\*

Bhutan-09015 YRMWYAYRCRSYYMWYAAAMMYCGAYYSCRMYCTRTRWGGTRYGYGACGGTGGYASRCYW 6120  
Bhutan-09024 YRMWYAYRCGSYTCMWYAAAMMYCGAYYSCRMYCTRTRWGGTRYGYGACGGTGGYASRCYW 6120  
Bhutan-09027 YRMWYAYRCGSYYMWYAAAMMYCGAYYSCRMYCTRTRWGGTRYGYGACGGTGGYASRCYW 6120  
Bhutan-09030 YRMWYAYRCGSYTCMWYAAAMMYCGAYYSCRMYCTRTRWGGTRYGYGACGGTGGYASRCYW 6120  
Bhutan-09005 CRMYWWTTRYGSTTCMWYWRMYSRWTGCRMCYCRCAARCACTRYGTRGTAKTRSGYTW 6120  
Indonesia-88035 CRMYWWTTRYGSTTCMWYWRMYSRWTGCRMCYCRCAARCACTRYGTRSYAKTRSGYTW 6120  
Indonesia-88045 CRMYWWTTRYGSTTCMWYWRMYSRWTGCRMCYCRCAARCACTRYGTRSYAKTRSGYTW 6120  
Indonesia-88065 CRMYWWTTRYGSTTCMWYWRMYSRWTGCRMCYCRCAARCACTRYGTRSYAKTRSGYTW 6120  
\* \* \* \* \* \* \* \* \* \* \* . \* \* \* \* . \* . . \* \*





Bhutan-09005 MTKYYRGYYKYRSAACTCTYASRRAGGRWAGYWSTARMKYTAYGRRYWAYGRRYAGRAGY 6480  
Indonesia-88035 MTKCYRGYYKYRSAACTCTYASRGAGGRWAGYWSTARMKYTAYGRRYWAYGRRYAGRAGY 6480  
Indonesia-88045 MTKCYRGYYKYRSAACTCTYASRGAGGRWAGYWSTARMKYTAYGRGTWAYGRRYAGRAGY 6480  
Indonesia-88065 MTKYYRGYYKYRSAACTCTYASRRAGGRWAGYWSTARMKYTAYGRGTWAYGRRYAGRAGY 6480  
.. \*\* . \* . . \* . . \* . \* . \*\* \*

Bhutan-09015 SYCSTRWRMRKGMAGGGCARWTTRMRRCYRRTYTYKAGAGWRWRAGCGCRAAYKARG 6540  
Bhutan-09024 SYCSTRWRMRKGMAGGGCARWTTRMRRCYRRTYTYKAGAGWRWRAGCGCRAAYKARG 6540  
Bhutan-09027 SYCSTRWRMRKGMAGGGCARWTTRMRRCYRRTYTYKAGAGWRWRAGCGCRAAYKARG 6540  
Bhutan-09030 SYCSTRWRMRKGMAGGGCARWTTRMRRCYRRTYTYKAGAGWRWRAGCGCRAAYKARG 6540  
Bhutan-09005 CTTYSKGAGMRGRMTMMRTKYRAAYAAAAATCCAYCKYTKMSRRAAARRATASGWMYGRAA 6540  
Indonesia-88035 CTTYSKGAGMGGRTCCATKYRACYGAAATCCAYCKYTKMSRRAAARRATASGWMYGRAA 6540  
Indonesia-88045 CTTYSKGAGMGGRTCCATKYRACYGAAATCCAYCKYTKMSRRAAARRATASGWMYGRAA 6540  
Indonesia-88065 CTTYSKGAGMRGRMTMMRTKYRAAYAAAAATCCAYCKYTKMSRRAAARRATASGWMYGRAA 6540  
. \* . \* . \* \* . \* . . \* .

Bhutan-09015 CAWTACRGRITCAACCYRRYRWYMKGCTKCTCTTTTKWKYCYCSGWCYTYGATRRCRRWM 6600  
Bhutan-09024 CAWTACRGRITCAACCYRRYRWYMKGCTKCTCTTTTKWKYCYCSGWCYTYGATRRCRRWM 6600  
Bhutan-09027 CAWTACRGRITCAACCYRRYRWYMKGCTKCTCTTTTKWKYCYCSGWCYTYGATRRCRRWM 6600  
Bhutan-09030 CAWTACRGRITCAACCYRRYRWYMKGCTKCTCTTTTKWKYCYCSGWCYTYGATRRCRRWM 6600  
Bhutan-09005 AWACGAARRYRTAMCRATGTCCKRMWTTYAWYWKWKTYYSSTMCYYSRAGGAYRWA 6600  
Indonesia-88035 AWACGAARITCATAMCRATGTCCKRMWTTYAWYWKWKTYYSSTMCYYSRAGGAYAGWA 6600  
Indonesia-88045 AWACGAARITCATAMCRATGTCCKRMWTTYAWYTWKTYYSSTMCYYSRAGGAYRWA 6600  
Indonesia-88065 AWACGAARRYRTAMCRATGTCCKRMWTTYAWYWKWKTYYSSTMCYYSRAGGAYRWA 6600  
. . \* :. \* \* . : .\*\* \* \* . \* . :

Bhutan-09015 CAYTSYRYCGRYRGKMARSYATKSRCKSGRTCYMKYMGTYGRYSRYATAYKRYRGRGYS 6660  
Bhutan-09024 CAYTSYRYCGRYRGKMARSYATKSRCKSGRTCYMKYMGTYGRYSRYATAYKRYRGRGYS 6660  
Bhutan-09027 CAYTSYRYCGRYRGKMARSYATKSRCKSGRTCYMKYMGTYGRYSRYATAYKRYRGRGYS 6660  
Bhutan-09030 CAYTSYRYCGRYRGKMARSYATKSRCKSGRTCYMKYMGTYGRYSRYATAYKRYRGRGYS 6660  
Bhutan-09005 YRYWSCRTMRAYARKMWRGCKWKGSRYSAGCYTCGYMSCTKRTGGCRYRYKGCATARTS 6660  
Indonesia-88035 YGYWSCRTMRAYARKMWRGCKWKGSRYSAGCYTCGYMSCTKRTGGCRYRYKGCATARTS 6660  
Indonesia-88045 YRYWSCRTMRAYARKMWRGCKWKGSRYSAGCYTCGYMSCTKRTGGCRYRYKGCATARTS 6660  
Indonesia-88065 YRYWSCRTMRAYARKMWRGCKWKGSRYSAGCYTCGYMSCTKRTGGCRYRYKGCATARTS 6660  
\* \* \* \* \* . . \*\* . \* . \* . \* . \*\* \*

Bhutan-09015 ARGKARRGWGAARACRSRGGTRSCAYWGRYRYYKYYGYMYMKRCYWYYTRWRRRKKCA 6720  
Bhutan-09024 ARGKARRGWGRMRACRSRGGTRSCAYWGRYRYYKYYGYMYMKRCYWYYTRWRRRKKCA 6720  
Bhutan-09027 ARGKARRGWGRMRACRSRGGTRSCAYWGRYRYYKYYGYMYMKRCYWYYTRWRRRKKCA 6720  
Bhutan-09030 ARGKARRGWGRMRACRSRGGTRSCAYWGRYRYYKYYGYMYMKRCYWYYTRWRRRKKCA 6720  
Bhutan-09005 CAKGRGAKTRAARATRCRTAYRSAGTARRYGYTTTCCYRATMTATYAYYKRAARRTKYC 6720  
Indonesia-88035 CAKGRGAKTRAARMTRCRTAYRSAGTARRYGYTTTCCYRATMTATYAYYKRAAARTKYC 6720  
Indonesia-88045 CAKGRGAKTGAARMTRCRTAYRSAGTARRYGYTTTCCYRATMTATYAYYKRAARRTKYC 6720  
Indonesia-88065 CAKGRGAKTRAARMTRCRTAYRSAGTARRYGYTTTCCYRATMTATYAYYKRAARRTKYC 6720  
. \* \* . \* . \* . \* . \* . \* . \* . \* . \*

Bhutan-09015 CYRKMTAKAMARYKYGKCMTTSMYATYTACCKYAWAAGTRCMMGYARMKGCYSMYAGKR 6780  
Bhutan-09024 CYRKMTAKAMARYKYGKCMTTSMYATYTACCKYAWAAGTRCMMGYARMKGCYSMYAGKR 6780  
Bhutan-09027 CYRKMTAKAMARYKYGKCMTTSMYATTTACCKYAWAAGTRCMMGYARMKGCYSMYAGKR 6780  
Bhutan-09030 CYRKMTAKAMARYKYGKCMTTSMYATYTACCKYAWAAGTRCMMGYARMKGCYSMYAGKR 6780  
Bhutan-09005 ATGKMYWKRCAAYKCATAMCWCATMCTYWSKYRARRRYAMCCRCMRATRSYGACMCTA 6780  
Indonesia-88035 ATGKMYWKRCAAYKCATAMCWCATMCTYWSKYRARRRYAMCCRCMRATRSYSMCMSTA 6780  
Indonesia-88045 ATGKMYWKRCAAYKCATAMCWCATMCTYWSKYRARRRYAMCCRCMRATRSYSMCMSTA 6780  
Indonesia-88065 ATGKMYWKRCAAYKCATAMCWCATMCTYWSKYRARRRYAWCCRCMRATRSYGACMCTA 6780

. \* \* \* . . . . \* . . . . \* . . . . \* . . . . \*

Bhutan-09015 TMRKGATGTWCSWAGKKWYRMSYGGGTGTTYWYWYRRAAGRRSSTTRMWCATYAYSYG 6840  
 Bhutan-09024 TMRKGATRWCWAGKKWYRMSYGGGTGTTYWYWYRRAAGRRSSTTRMWCATYAYSYG 6840  
 Bhutan-09027 TARKGATGTWCSWAGKKWYRMSYGGGTGTTYWYWYRRAAGRRSSTTRMWCATYAYSYG 6840  
 Bhutan-09030 TMRKGAWGYWCSWAGKKWYRMSYGGGTGTTYWYWYRRAAGRRSSTTRMWCATYAYSYG 6840  
 Bhutan-09005 YCRTGAWGTTYCARKKATAACTGRKTSYYYWYWRRRRKRGRSSWWWRCTYRYCTYGTR 6840  
 Indonesia-88035 YCRTGATGTCCARKTKATGACYGRKCSYYYWYWRRRRKRGRSSWWWRCTYRYCTYGTR 6840  
 Indonesia-88045 YCRTKWWGTTCARKKTKATGACYGRKCSYYYWYWRRRRKRGRSSWWWRCTYATCTYGTR 6840  
 Indonesia-88065 YCRTKWTGTTYCARKKATAACTGRKTSYYYWYWRRRRKRGRSSWWWRCTYRYCTYGTR 6840

\* . . . . . \*\*\*\*\* \*\*\* \* : .

Bhutan-09015 ARRATATAKYRWGMKKGRGTGTYGMYRAGTCCYRTACKYRTSKRRTCTARRYGWTKRGT 6900  
 Bhutan-09024 ARRATATAKYRWGMKKGRGTGWYGYMYRAGTCCYRTACKYRTSKRRTCTARRYGWTKRGT 6900  
 Bhutan-09027 ARRATATAKYRWGMKKGRGTGWYGYMYRAGTCCYRTACKYRTSKRRTCTARRYGWTKRGT 6900  
 Bhutan-09030 ARRATATAKYRWGMKKGRGTGWYGYMYRAGTCCYRTACKYRTSKRRTCTARRYGWTKRGT 6900  
 Bhutan-09005 RRRMYRWRTTGWRMGTTCATCYKCCYGGTKMYCAYRMTYAYSKAAYCAAGCRAYTAGK 6900  
 Indonesia-88035 RRRMYRWRTTGWRMGTTCATCYKCCYGGTKMYCAYRMTYAYSKAAYCAAGCRAYTAGK 6900  
 Indonesia-88045 RRRMYRWRTTGWRMGTTCATCYKCCYGGTKMYCAYRMTYAYSKAAYCAAGCRAYTAGK 6900  
 Indonesia-88065 RRRMYRWRTTGWRMGTTCATCYKCCYGGTKMYCAYRMTYAYSKAAYCAAGCRAYTAGK 6900

\*\* . \* \* . . \* \* . . . \*\* . : . .

Bhutan-09015 YRRAYTMSWYKMYCCGYTWYKCTCCYAKTGTARRWGTTRCRYRKGWTTAKYTTWYWW 6960  
 Bhutan-09024 YRRAYTMSWYKMYCCGYTWYKCTCCYAKTGTARRWGTTRCRYRKGWTTAKYTTWYWW 6960  
 Bhutan-09027 YRRAYTMSWYKMYCCGYTWYKCTCCYAKTGTARRWGTTRCRYRKGWTTAKYTTWYWW 6960  
 Bhutan-09030 YRRAYTMSWYKMYCCGYTWYKCTCCYAKTGTARRWGTTRCRYRKGWTTAKYTTWYWW 6960  
 Bhutan-09005 TAARCYACTTAGCGCCYGATAACKTYCTCAKCATGRGRARGGARYWTGTYGGGTYWYWT 6960  
 Indonesia-88035 TAARCYACTTAGCGCCYGATAACKTYCTCAKCATGRGRARGGARYWTGTYGGGTYWYWT 6960  
 Indonesia-88045 TAARCYACTTAGCGCCYGATAACKTYCTCAKCATGRGRARGGARYWTGTYGGGTYWYWT 6960  
 Indonesia-88065 TAARCYACTTAGCGCCYGATAACKTYCTCAKCATGRGRARGGARYWTGTYGGGTYWYWT 6960

. : \* \* . . \*\* . \*\*\*

Bhutan-09015 AKRRTTGRMTTATKATGRYRTGCSRYKTKCYTAMRYRACTWTAAGTGSAYYTAWTCAY 7020  
 Bhutan-09024 AKRRTTGRMTTATKATGRYRTGCSRYKTKCYTAMRYRACTWTAAGTGSAYYTAWTCAY 7020  
 Bhutan-09027 AKRRTTGRMTTATKATGRYRTGCSRYKTKCYTAMRYRACTWTAAGTGSAYYTAWTCAY 7020  
 Bhutan-09030 AKRRTTGRMTTATKATGRYRTGCSRYKTKCYTAMRYRACTWTAAGTGSAYYTAWTCAY 7020  
 Bhutan-09005 RGGYCYAGCAYWMTCTGTYRWRYGACGYTYCYGAGCGMSCWYMWRYTYSRCYKWWYAGC 7020  
 Indonesia-88035 RGGYCYAGCAYWMTCTGTYRWRYGACGYTYCYGAGCGMSCWYMWRYTYSRCYKWWYAGC 7020  
 Indonesia-88045 RGGYCYAGCAYWMTCTGTYRWRYGACGYTYCYGAGCGMSCWYMWRYTYSRCYKWWYAGC 7020  
 Indonesia-88065 RGGYCYAGCAYWMTCTGTYRWRYGACGYTYCYGAGCGMSCWYMWRYTYSRCYKWWYAGC 7020

. : . \*\* . . \* . . \* \* \* \* . .

Bhutan-09015 YAGRKRCTCGMTWYGWCYMRKTAMRYKMYRCTTWKCKCMMARYKMSYRMYGRRATYGGG 7080  
 Bhutan-09024 YAGRKRCTCGMTWYGWCYMRKTAMRYKMYRCTTWKCKCMMARYKMSYRMYGRRATYGGG 7080  
 Bhutan-09027 YAGRKRCTCGMTWYGWCYMRKTAMRYKMYRCTTWKCKCMMARYKMSYRMYGRRATYGGG 7080  
 Bhutan-09030 YAGRKRCTCGMTWYGWCYMRKTAMRYKMYRCTTWKCKCMMARYKMSYRMYGRRATYGGG 7080  
 Bhutan-09005 CRRGTGGYKCYACRWYTCMRKWRAGCGACGGAYTKYTYMMRAYKASCACYARRRYTAKR 7080  
 Indonesia-88035 CRRGTGGYKCYACRWYTCMRKWRAGCGACGGAYTKYTYMMRAYKASCACYARRRYTAKR 7080  
 Indonesia-88045 CRRGTGGYKCYACRWYTCMRKWRAGCGACGGAYTKYTYMMRAYKASCACYARRRYTAKR 7080  
 Indonesia-88065 CRRGTGGYKCYACRWYTCMRKWRAGCGACGGAYTKYTYMMRAYKASCACYARRRYTAKR 7080

. \*\*\* : \* . \*\* \* \* \* \* . .

Bhutan-09015 WYWGMRTRTRTAAGYAYACTKACRCRGTTCMWRARCYGRRKGYMGYYTRRATAAMATYAAM 7140  
 Bhutan-09024 WYWGMRTRTRTAAGYAYACTKACRCRGTTCMWRARCYGRRKGYMGYYTRRATAAMATYAAM 7140

|                 |                                                               |      |
|-----------------|---------------------------------------------------------------|------|
| Bhutan-09027    | WYWGMTRTRTAAGYAYACTKACRCRGTMMWRRARCYGRKGYMGYYTRRТААМАТYAAM    | 7140 |
| Bhutan-09030    | WYWGMTRTRTAAGYAYACTKACRCRGTMMWRRARCYGRKGYMGYYTRRТААМАТYAAM    | 7140 |
| Bhutan-09005    | ACTRCCGYAYRRRTRCMYKWSGYSRGYACAGAMAACAAAGRTCRCTYGGCRGARWCGWC   | 7140 |
| Indonesia-88035 | ACTRCCGYAYRRRTRCMYKWSGYSRGYACAGAMAACAAAGRTCRCTYGGCRGARWCGWC   | 7140 |
| Indonesia-88045 | ACTRCCGYAYRRRTRCMYKWSGYSRGYACAGAMAACAAAGRTCRCTYGGCRGARWCGWC   | 7140 |
| Indonesia-88065 | ACTRCCGYAYRRRTRCMYKWSGYSRGYACAGAMAACAAAGRTCRCTYGGCRGARWCGWC   | 7140 |
|                 | * . . . . .                                                   |      |
| Bhutan-09015    | AAGTGRRYMKRGAAYRRGGTTATWCYGYAKCAWGYCRMRYCAYRTTTTYGACCYCYRMTA  | 7200 |
| Bhutan-09024    | AARWGRRYMKRGAAYRRGGTTATWCYGYAKCAWGYCGMRYCAYRTTTTYGACCYYRMTA   | 7200 |
| Bhutan-09027    | AARWGRRYMKRGAAYRRGGTTATWCYGYAKCAWGYCRMRYCAYRTTTTYGACCYYRMTA   | 7200 |
| Bhutan-09030    | AARWGRRYMKRGAAYRRGGTTATWCYGYAKCAWGYCRMRYCAYRTTTTYGACCYCYRMTA  | 7200 |
| Bhutan-09005    | GRRTKAGYMKRSRCAATYWMYWTAYWYRARYTRCRYWTAAYWYTSRYTTCCRMKW       | 7200 |
| Indonesia-88035 | GRRTKAGYMKRSRCAATYWMYWTAYWYRARYTRCRYWTAAYWYTSRYTTCCRMKW       | 7200 |
| Indonesia-88045 | GRRTKAGYMKRSRCAATYWMYWTAYWYRARYTRCRYWTAAYWYTSRYTTCCRMKW       | 7200 |
| Indonesia-88065 | GRRTKAGYMKRSRCAATYWMYWTAYWYRARYTRCRYWTAAYWYTSRYTTCCRMKW       | 7200 |
|                 | . ****. * . * * . **.                                         |      |
| Bhutan-09015    | GKRYRTASRKRKTMRYKGYTKCCYWYRTGYATACSWGWTWGYAAGGAAMMKGRAYCRM    | 7260 |
| Bhutan-09024    | GKRYMWASRKRKTMRYKGYTKCCYWYRTGYRTACSWGWTWGYAAGGAAMMKGRAYCRM    | 7260 |
| Bhutan-09027    | GKRYAWASRKRKTMRYKGYTKCCYWYRTGYRTACSWGWTWGYAAGGAAMMKGRAYCRM    | 7260 |
| Bhutan-09030    | GKRYRTASRKRKTMRYKGYTKCCYWYRTGYRTACSWGWTWGYAAGGAAMMKGRAYCRM    | 7260 |
| Bhutan-09005    | RKRYATMCGTAYKAAKRYCTMYCYATTAYKCAKRTSARYTKTWRRARRCMKSRWTYRC    | 7260 |
| Indonesia-88035 | RKRYRTACGTAYKAAKRYCTMYCYATTAYKCAKRTSARYTKTWRRARRCMKSRWTYRC    | 7260 |
| Indonesia-88045 | RKRYRTACGTAYKAAKRYCTMYCYATTAYKCAKRTSAGTTKWRARRCMKSRWTYRC      | 7260 |
| Indonesia-88065 | RKRYATACGTAYKAAKRYCTMYCYATTAYKCAKRTSARYTKTWRRARRCMKSRWTYRC    | 7260 |
|                 | *** . . . ** * . * . * . **.* *                               |      |
| Bhutan-09015    | RRCCSWRRYWSKYGTSSATKMTRYRWKWWYWRYCGMRRTTYKRRRYMRMCKRRYARKCY   | 7320 |
| Bhutan-09024    | RRCCSWRRYWSKYGTSSATKMWYRWKWWYWRYCGMRRTTYKRRRYMRMCKRRYARKCY    | 7320 |
| Bhutan-09027    | RRCCSWRRYWSKYGTSSATKMWYRWKWWYWRYCGMRRTTYKRRRYMRMCKRRYARKCY    | 7320 |
| Bhutan-09030    | RRCCSWRRYWSKYGTSSATKMWYRWKWWYWRYCGMRRTTYKRRRYMRMCKRRYARKCY    | 7320 |
| Bhutan-09005    | RRYYGARGCASTYRCSSTCGMTGCGAKATCTGCARRCRRYYTKRAACARMYKRRYRAKCY  | 7320 |
| Indonesia-88035 | RRYYGARGCASTYRCSSTCGMTGCGAKATCTGCARRCRRYYTKRAACARMYKRRYRAKCY  | 7320 |
| Indonesia-88045 | RRYYGARGCASTYRCSSTCGMTGCGAKATCTGCARRCRRYYTKRAACARMYKRRYRAKCY  | 7320 |
| Indonesia-88065 | RRYYGARGCASTYRCSSTCGMTGCGAKATCTGCARRCRRYYTKRAACARMYKRRYRAKCY  | 7320 |
|                 | ** . * *. * .: * * . * * * * * * * *                          |      |
| Bhutan-09015    | STCGRTGYSKYGRYRAATCTMRGSATKATAARYCRCTYRGTAWTYGCRRWGYMCYRTSA   | 7380 |
| Bhutan-09024    | STCGRTGYSKYGRYRAATCTMRGSATKATAARYCRCTYRGTAWTYGCRRWGYMCYRTSA   | 7380 |
| Bhutan-09027    | STCGRTGYSKYGRYRAATCTMRGSATKATAARYCRCTYRGTAWTYGCRRWGYMCYRTSA   | 7380 |
| Bhutan-09030    | STCGRTGYSKYGRYRAATCTMRGSATKATAARYCRCTYRGTAWTYGCRRWGYMCYRTSA   | 7380 |
| Bhutan-09005    | SKSKAYRYCGCRRYAGWYWCASCYKGGRRRTYRSKCGKYMWYTCYGGTKTYMTGKSM     | 7380 |
| Indonesia-88035 | SKSKAYRYCGCRRYAGWYWCASCYKGGRRRTYRSKCGKYMWYTCYGGTKTYMTGKSM     | 7380 |
| Indonesia-88045 | SKSKAYRYCGCRRYAGWYWCASCYKGGRRRTYRSKCGKYMWYTCYGGTKTYMTGKSM     | 7380 |
| Indonesia-88065 | SKSKAYRYCGCRRYAGWYWCASCYKGGRRRTYRSKCGKYMWYTCYGGTKTYMTGKSM     | 7380 |
|                 | *.. * . ** . .*. * . * *.. * ** .*                            |      |
| Bhutan-09015    | GAGRCRAYCMWYKACAATKGGCACYWRSYSGCCRAYGTSAMMTRTCTTATATMGYGTGAY  | 7440 |
| Bhutan-09024    | GAGRCRAYCMWYKACAATKGGCACYWRSYSGCCRAYGTSAMMTRTCTTATATMGYGTGAY  | 7440 |
| Bhutan-09027    | GAGRCRAYCMWYKACAATKGGCACYWRSYSGCCRAYGTSAMMTRTCTTATATMGYGTGAY  | 7440 |
| Bhutan-09030    | GAGRCRAYCMWYKACAATKGGCACYWRSYSGCCRAYGTSAMMTRTCTTATATMGYGTGAY  | 7440 |
| Bhutan-09005    | AWKRSRTYMMACKRSMCTKSRYGTTWRCYCRYMAGTKKGCWCMCGYMYTRTRTAGTRTRWC | 7440 |
| Indonesia-88035 | AWKRSRTTACACGRSMCKSRYGTTWRCYCRYCAGTKKGCWCMCGYMYWRWRYASTAYRWC  | 7440 |

|                 |                                                                 |      |
|-----------------|-----------------------------------------------------------------|------|
| Indonesia-88045 | AWKRSRTTACAGSRMCKKSRYGTTWRCYCRYMAGTKKGWCMCGYMYWRWRYASTRYRWC     | 7440 |
| Indonesia-88065 | AWKRSRTYMMACKRSMCTKSRYGTTWRCYCRYMAGTKKGWCMCGYMYTRTRTAGTRTRWC    | 7440 |
|                 | . * . * : . . * . . * * . * . . . *                             |      |
| Bhutan-09015    | KRYMMWAYGRATCMTTAYRCTCYAGYCGGTRRARRMTSYMRTKAGARGWTTKGRACKRWS    | 7500 |
| Bhutan-09024    | KRYMMWAYGRATCMTTAYRCTCYAGYCGGTRRARRMTSYMRTKAGARGWTTKGRACKRWS    | 7500 |
| Bhutan-09027    | KRYMMWAYGRATCMTTAYRCTCYAGYCGGTRRARRMTSYMRTKAGARGWTTKGRACKRWS    | 7500 |
| Bhutan-09030    | KRYMMWAYGRATCMTTAYRCTCYAGYCGGTRRARRMTSYMRTKAGARGWTTKGRACKRWS    | 7500 |
| Bhutan-09005    | TGYACATYRARCSYCCGYACWSYRRCARSYGGMRACCYCAWTGKCGRTAATSGRYGGTC     | 7500 |
| Indonesia-88035 | TGYACATYRARCCYCCGYASWSYRRCARSYGGMRACCYCATGKCGRTAATSGRYGGTC      | 7500 |
| Indonesia-88045 | TGYACATYRARCCYCCGYASWSYRRCARSYGGMRACCYCATGKCGRTAATSGRYGGTC      | 7500 |
| Indonesia-88065 | TGYACATYRARCCYCCGYACWSYRRCARSYGGMRACCYCATGKCGRTAATSGRYGGTC      | 7500 |
|                 | . * : * . . * . * . . * * . * . . . : : . . .                   |      |
| Bhutan-09015    | ARWCYRRTWWYRYRTRTRYGGKTYAYCRWWCWRYTKMARWSRGWGRMMASCTCKGRCCR     | 7560 |
| Bhutan-09024    | ARWCYRRTWWYRYRTRTRYGGKTYAYCRWWCWRYTKMARWSRGWGRMMASCTCKGRCCR     | 7560 |
| Bhutan-09027    | ARWCYRRTWWYRYRTRTRYGGKTYAYCRWWCWRYTKMARWSRGWGRMMASCTCKGRCCR     | 7560 |
| Bhutan-09030    | ARWCYRRTWWYRYRTRTRYGGKTYAYCRWWCWRYTKMARWSRGWGRMMASCTCKGRCCR     | 7560 |
| Bhutan-09005    | WGAYCGAYAATGCAYKATTKRKYCWYGYGTWYWRYYGCRAACAKAGRAMWCMTYMGRGYA    | 7560 |
| Indonesia-88035 | WGAYCGAYAATGCAYKATTKRKYCWYGYGTWYWRYYGCRAACAKAGRAMWCMTYMGRGYA    | 7560 |
| Indonesia-88045 | WGAYCGAYAATGCAYKATTKRKYCWYGYGTWYWRYYGCRAACAKAGRAMWCMTYMGRGYA    | 7560 |
| Indonesia-88065 | WGAYCGAYAATGCAYKATTKRKYCWYGYGTWYWRYYGCRAACAKAGRAMWCMTYMGRGYA    | 7560 |
|                 | . . * * * * . . * * . *                                         |      |
| Bhutan-09015    | RTGKRSMYRYAMYTMSSTGYRYRCKTGYYGKAAKRMRYRYAYTRKTYGSRTRRKYYY       | 7620 |
| Bhutan-09024    | RTGKRSMYRYAMYTMSSTGYRYRCKTGYYGKAAKRMRYRYAYTRKTYGSRTRRKYYY       | 7620 |
| Bhutan-09027    | RTGKRSMYRYAMYTMSSTGYRYRCKTGYYGKAAKRMRYRYAYTRKTYGSRTRRKYYY       | 7620 |
| Bhutan-09030    | RTGKRSMYRYAMYTMSSTGYRYRCKTGYYGKAAKRMRYRYAYTRKTYGSRTRRKYYY       | 7620 |
| Bhutan-09005    | AAAKRCYCTACMAYWASSWCYACATCYSYSGMCKGMRKTGYRRTYGGARYSAWARKTTT     | 7620 |
| Indonesia-88035 | AAAKRCYCTACMAYWASSWCYACAKSYSCSGMCKGMRKTGYRRTYGGARYSAWARKTTT     | 7620 |
| Indonesia-88045 | AAAKRCYCTACMAYWASSWCYACATCYSYSGMCKGMRKTGYRRTYGGARYSAWARKTTT     | 7620 |
| Indonesia-88065 | AAAKRCYCTACMAYWASSWCYACATCYSYSGMCKGMRKTGYRRTYGGARYSAWARKTTT     | 7620 |
|                 | : . * * . * * * * * . . . . * * * * * * : * * * *               |      |
| Bhutan-09015    | ATWGSKGASRWRA YRMYRRYARCRGRTWGGAYYRKCCTRM YACGGKGTGAAYYYT SYTAS | 7680 |
| Bhutan-09024    | ATWGSKGASRWRA YRMYRRYARCRGRTWGGAYYRKCCTRM YACGGKGTGAAYYYT SYTAS | 7680 |
| Bhutan-09027    | ATWGSKGASRWRA YRMYRRYARCRGRTWGGAYYRKCCTRM YACGGKGTGAAYYYT SYTAS | 7680 |
| Bhutan-09030    | ATWGSKGASRWRA YRMYRRYARCRGRTWGGAYYRKCCTRM YACGGKGTGAAYYYT SYTAS | 7680 |
| Bhutan-09005    | GWWRGSKRSATRCYAAAYAATMGYAKGYAGKGTATMYACTMSRRKRYSWRYYYGCTRS      | 7680 |
| Indonesia-88035 | GWWRGSKRSATRCYAAAYAATMGYAKGYASGACTATCYACTMSRRKRYCWRYYYGCTRS     | 7680 |
| Indonesia-88045 | GWWRGSKRSATRCYAAAYAATMGYAKGYASGACTATCYACTMSRRKRYCWRYYYGCTRS     | 7680 |
| Indonesia-88065 | GWWRGSKRSATRCYAAAYAATMGYAKGYAGKGTATMYACTMSRRKRYSWRYYYGCTRS      | 7680 |
|                 | . * . . * * * . * * . . . . * * * * . *                         |      |
| Bhutan-09015    | RYKMYACYCCTYKYWGAWAMCACCACYMTYTTCCYGWCSYYKTWAACRYRCRTAKWSCTG    | 7740 |
| Bhutan-09024    | RYKMYACYCCTYKYWGAWAMCACCACYMTYTTCCYGWCSYYKTWAACRYRCRTAKWSCTG    | 7740 |
| Bhutan-09027    | RYKMYACYCCTYKYWGAWAMCACCACYMTYTTCCYGWCSYYKTWAACRYRCRTAKWSCTG    | 7740 |
| Bhutan-09030    | RYKMYACYCCTYKYWGAWAMCACCACYMTYTTCCYGWCSYYKTWAACRYRCRTAKWSCTG    | 7740 |
| Bhutan-09005    | RCGACCYTGYGGTWAATCYCYRSTAWYYGTMSTYSTTTTGMAYGYRRTGWSYA           | 7740 |
| Indonesia-88035 | RCGACAYTSTYKTKWAWTCCCYRYSYAWYYTMTGTYSTTTCTGMAYGYRRTGWSYA        | 7740 |
| Indonesia-88045 | RCGACAYTSTCYKTKWAWTCCCYRYSYAWYYTMTGTYSTTTCTGMAYGYRRTGWSYA       | 7740 |
| Indonesia-88065 | RCGACCYTGYGGTWKWATCYCYRSTAWYYGTMSTYSTTTTGMAYGYRRTGWSYA          | 7740 |
|                 | * . * * : . . * . * . . * * * * . . .                           |      |



|                 |                                                               |      |
|-----------------|---------------------------------------------------------------|------|
| Bhutan-09005    | YRYAKRACGWGWTYWKRRYWSRRRARWKKSAYTRYTMRYGYMCSWAWGCTSAKRKAYAGT  | 8100 |
| Indonesia-88035 | YRYAKGAYGWGWTYWKRRYWCRRARWKKSAYTRYTMRYGYMCSWAWGCTSAKRKAYAGT   | 8100 |
| Indonesia-88045 | YRYAKGAYGWGWTYWKRRYWCRRARWKKSAYTRYTMRYGYMCSWAWGCTSAKRKAYAGT   | 8100 |
| Indonesia-88065 | YRYAKRACGWGWTYWKRRYWSRRRARWKKSAYTRYTMRYGYMCSWAWGCTSAKRKAYAGT  | 8100 |
|                 | * . . * **** .* ***. * ** . . . *                             |      |
| Bhutan-09015    | CTACRAAYTGGGYYGTRMYTRGAKYRWSWWYAWRTTTTATTGTGTRARRCGTRRRRAGR   | 8160 |
| Bhutan-09024    | CTACRAAYTGGGYYGTRMYTRGAKYRWSWWYAWRTTTTATTGTGTRARRCGTRRRRAGR   | 8160 |
| Bhutan-09027    | CTACRAAYTGGGYYGTRMYTRGAKYRWSWWYAWRTTTTATTGTGTRARRCGTRRRRAGR   | 8160 |
| Bhutan-09030    | CTACRAAYTGGGYYGTRMYTRGAKYRWSWWYAWRTTTTATTGTGTRARRCGTRRRRAGR   | 8160 |
| Bhutan-09005    | SWRSRWYYGGGYYTSYRAYYRSCCTCGTCAWTWRTATYKWWRTRTGGARMRYGGGRRKG   | 8160 |
| Indonesia-88035 | SWGSGWTCYKRKYYSYRAYYGSCTCGTCAWTWRTAKYKWGARYGAGGARMRCGGGRRKG   | 8160 |
| Indonesia-88045 | SWGSGWTCYKRKYYSYRAYYGSCTCGTCAWTWRTAKYKWGARYGAGGARMRCGGGRRKG   | 8160 |
| Indonesia-88065 | SWRSRWYYGGGYYTSYRAYYRSCCTCGTCAWTWRTATYKWWRTRTGGARMRYGGGRRKG   | 8160 |
|                 | . . ** . * * ... . * * . . : . *                              |      |
| Bhutan-09015    | AYGCTMRRCYKAKARSSSKRRAKSGTKYGYRCTAARGATAGRTYKRRCRTCRYGAATYAW  | 8220 |
| Bhutan-09024    | AYGCTMRRCYKAKARSSSKRRAKSGTKYGYRCTAARGATAGRTYKRRCRTCRYGAATYAW  | 8220 |
| Bhutan-09027    | AYGCTMRRCYKAKARSSSKRRAKSGTKYGYRCTAARGATAGRTYKRRCRTCRYGAATYAW  | 8220 |
| Bhutan-09030    | AYGCTMRRCYKAKARSSSKRRAKSGTKYGYRCTAARGATAGRTYKRRCRTCRYGAATYAW  | 8220 |
| Bhutan-09005    | CTGTKMARTYGRTRGCGGGRGMTGRYTTRYRYWWGAWYWKRWCGGACACYGTRRRYCMW   | 8220 |
| Indonesia-88035 | CTRTKMARTYGRTRGCGGGRGMTGRYTTRYRYWWGAWYWKRWCGGACACCGTRRRYCMW   | 8220 |
| Indonesia-88045 | CTRTKMARTYGRTRGCGGGRGMTGRYTTRYRYWWGAWYWKRWCGGAYACCGTRRRYCMW   | 8220 |
| Indonesia-88065 | CTGTKMARTYGRTRGCGGGRGMTGRYTTRYRYWWGAWYWKRWCGGAYACCGTRRRYCMW   | 8220 |
|                 | . . * * * . . . * .. . ** . * *                               |      |
| Bhutan-09015    | YYYATRSMWAMWMSAASKWAYRYTTTCGCYATRRRAACRCGTAAMWKRCYGYGAWYYWTY  | 8280 |
| Bhutan-09024    | YYYATRSCAAMWMSAASKWAYRYTTTCCKYATAAAAAACRCGTAAMWKRCYGYGATYYWTY | 8280 |
| Bhutan-09027    | YYYATRSMWAMWMSAASKWAYRYTTTCCKYATAAAAAACRCGTARMWKRCYGYGAWYYWTY | 8280 |
| Bhutan-09030    | YYYATRSMWAMWMSAASKWAYRYTTTCCKYATAAAAAACRCGTARMWKRCYGYGATYYWTY | 8280 |
| Bhutan-09005    | CCTTCGCCAWAACSMGGTTRYGCVWSTYCWYAAAARYRYRTACATAYTRTATTCTTYT    | 8280 |
| Indonesia-88035 | CCTWCGCCAWAACSMGGTTRYGCVWSTYCATAAAARYRYRTACATAYTRTATTCTTYT    | 8280 |
| Indonesia-88045 | CCTWCGCCAWAACSMGGTTRYGCVWSTYCWYAAAARYRYRTACATAYTRTATTCTTYT    | 8280 |
| Indonesia-88065 | CCTTCGCCATAACSMGGTTRYGCVWSTYCWYAAAARYRYRWWACATAYTRTATTCTTYT   | 8280 |
|                 | . * .. * . * . . :                                            |      |
| Bhutan-09015    | GACCCAACTTGAAYGACRTTMSKYAYYWKCGGTGAGKWWGGRGMTTKSKASGYR        | 8340 |
| Bhutan-09024    | GACCCAACTTGAAYGACRTTMSKYAYYWKCGGTGAGKWWGGRGMTTKSKASGYR        | 8340 |
| Bhutan-09027    | GACCCAACTTGAAYGACRTTMSKYAYYWKCGGTGAGKWWGGRGMTTKSKASGYR        | 8340 |
| Bhutan-09030    | GACCCAACTTGAAYGACRTTMSKYAYYWKCGGTGAGKWWGGRGMTTKSKASGYR        | 8340 |
| Bhutan-09005    | AWYYMRRYWYRRWTMTGYRYACYCTTTTCTYKMRYSMRKWGKRARYAYWGYGTRGRTA    | 8340 |
| Indonesia-88035 | AWYYMRRYWYRRWTMTGYRYACYCTTTTCTYKMRYSMRKWGKRARYAYWGYGTRGRTA    | 8340 |
| Indonesia-88045 | AWYYMRRYWYRRWTMTGYRYACYCTTTTCTYKMRYSMRKWKKRARYAYWGYGTRGRTA    | 8340 |
| Indonesia-88065 | AWYYMRRYWYRRWTMTGYRYACYCTTTTCTYKMRYSMRKWGKRARYAYWGYGTRGRTA    | 8340 |
|                 | . . . * : * .. : ** . ** .. .                                 |      |
| Bhutan-09015    | CYRWKMRCTGCWYCCRYAMYCCWYTTACTSTCTKWGTTYWCAARTACAATYRKAGRYYW   | 8400 |
| Bhutan-09024    | CYRWKMRCTGCWYCCRYAMYCCWYTTACTSTCTKWGTTYWCAARTACAATYRKAGRYYW   | 8400 |
| Bhutan-09027    | CYRWKMRCTGCWYCCRYAMYCCWYTTACTSTCTKWGTTYWCAARTACAATYRKAGRYYW   | 8400 |
| Bhutan-09030    | CYRWKMRCTGCWYCCRYAMYCCWYTTACTSTCTKWGTTYWCAARTACAATYRKAGRYYW   | 8400 |
| Bhutan-09005    | YTGAGMGWRYAYTTRYWMCYYYATKARYCSYYKKTGTCYAYTMGMYRRYTATTRAYCA    | 8400 |
| Indonesia-88035 | YTGAGMGWRYAYTTRYWMCYYYATKARYCSYYKKTGTCYAYTMGMYRRYTATTRAYCA    | 8400 |
| Indonesia-88045 | YTGAGMGWRYAYTTRYWMCYYYATKARYCSYYKKTGTCYAYTMGMYRRYTATTRAYCA    | 8400 |
| Indonesia-88065 | YTGAGMGWRYAYTTRYWMCYYYATKARYCSYYKKTGTCYAYTMGMYRRYTATTRAYCA    | 8400 |

\* \* \* \* \* .: \* .\* \* : . .: \*

Bhutan-09015 WMRYRYWYYCGKCAWRYTWRWCGYTCYRYRYAYKWWWYGSYRYAYCCCRGKRRRTRCCG 8460

Bhutan-09024 WMRYRYWYYCGKCAWRYTWRWCGYTCYRYRYAYKWWWYGSYRYAYCCCRGKRRRTRCCG 8460

Bhutan-09027 WMRYRYWYYCGKCAWRYTWRWCGYTCYRYRYAYKWWWYGSYRYAYCCCRGKRRRTRCCG 8460

Bhutan-09030 WMRYRYWYYCGKCAWRYTWRWCGYTCYRYRYAYKWWWYGSYRYAYCCCRGKRRRTRCCG 8460

Bhutan-09005 TMGCGTWTYRRTTAARCKTAWYRCTSCRCYWYGWWWYRSYRYWYKSYASKRGAYGTGK 8460

Indonesia-88035 TMGCGTWTYRRTTAARCKTAWYRCTSCRCYWYGWWWYRSYRYWYKSYASKRGAYGTGK 8460

Indonesia-88045 TMGCGTWTYRRTTAARCKTAWYRCTSCRCYWYGWWWYRSYRYWYKSYASKRGAYGTGK 8460

Indonesia-88065 TMGCGTWTYRRTTAARCKTAWYRCTSCRCYWYGWWWYRSYRYWYKSYASKRGAYGTGK 8460

\* \* . \* . \* . \* \* \* \* \* . \* \* \* . . \*\*

Bhutan-09015 YRAMRTTYMGRTTYRRTSWTCCRYRRRRGMTRWGRYSYATMCRYWMAAAGAGYKYKWSRA 8520

Bhutan-09024 YRAMRTTYMGRTTYRRTSWTCCRYRRRRGMTRWGRYSYATMCRYWMAAAGAGYKYKWSRA 8520

Bhutan-09027 YRAMRTTYMGRTTYRRTSWTCCRYRRRRGMTRWGRYSYATMCRYWMAAAGAGYKYKWSRA 8520

Bhutan-09030 YRAMRTTYMGRTTYRRTSWTCCRYRRRRGMTRWGRYSYATMCRYWMAAAGAGYKYKWSRA 8520

Bhutan-09005 CRGACKYMAAKYRATCTWMMACAAAGSCCGARGYGTWYAYGYWMTRWRRACTTCKWSRM 8520

Indonesia-88035 CRGACKYMAAKYRATCTWMMACAAAGSCCGARGYGTWYAYGYWMTRWRRACTTCKWSRM 8520

Indonesia-88045 CRGACKYMAAKYRATCTWMMACAAAGSCCGARGYGTWYAYGYWMTRWRRACTTCKWSRM 8520

Indonesia-88065 CRGACKYMAAKYRATCTWMMACAAAGSCCGARGYGTWYAYGYWMTRWRRACTTCKWSRM 8520

\* . . \*\* . . \*\* . \* . \* \* \* : . . \* \* \*

Bhutan-09015 RAGTAKCAGTAYYACCCYWACYWAWACRMCRYCMWRRCYSRWRMGRTSRCTYMRTCYA 8580

Bhutan-09024 RAGTAKCAGTAYYACCCYWACYWAWACRMCRYCMWRRCYSRWRMGRTSRCTYMRTCYA 8580

Bhutan-09027 RAGTAKCAGTAYYACCCYWACYWAWACRMCRYCMWRRCYSRWRMGRTSRCTYMRTCYA 8580

Bhutan-09030 RAGTAKCAGTAYYACCCYWACYWAWACRMCRYCMWRRCYSRWRMGRTSRCTYMRTCYA 8580

Bhutan-09005 RMKYMKYWKKRTRTYTCAATYTCWATRTACSGCCAAAGYCRAAAGAKGRYTKYMRCYCR 8580

Indonesia-88035 RCKYCTYWKKRTRTYTCAATYTCWATRTACSGCCAAAGYCRAAAGAKGRYTKYMRCYCR 8580

Indonesia-88045 RMKYMKYWKKRTRTYTCAATYTCWATRTACSGCCAAAGYCRAAAGAKGRYTKYMRCYCR 8580

Indonesia-88065 RMKYMKYWKKRTRTYTCAATYTCWATRTACSGCCAAAGYCRAAAGAKGRYTKYMRCYCR 8580

\* . . : \* . . \* . \* . \* . \* . \*

Bhutan-09015 CYTSGTWWMGYSRCTMCKRCWYTWYIYAWTRCGWRGYCAAMAARRTYRWWYAGYGTGTART 8640

Bhutan-09024 CYTSGTWWMGYSRCTMCKRCWYTWYIYAWTRCGWRGYCAAMAARRTYRWWYAGYGTGTART 8640

Bhutan-09027 CYTSGTWWMGYSRCTMCKRCWYTWYIYAWTRCGWRGYCAAMAARRTYRWWYAGYGTGTART 8640

Bhutan-09030 CYTSGTWWMGYSRCTMCKRCWYTWYIYAWTRCGWRGYCAAMAARRTYRWWYAGYGTGTART 8640

Bhutan-09005 TTYCRYATCRCCAYKMYTGTWTAAYTCRAGAMTTAKYRWRMRAAGYCAATAGRTYKWWGK 8640

Indonesia-88035 TTYCRYATCRCCAYKMYTGTWTAAYTCRAGAMTTAKYRWRMRAAGYCAATAGRTYKWWGK 8640

Indonesia-88045 TTYCRYATCRCCAYKMYTGTWTAAYTCRAGAMTTAKYRWRMRAAGYCAATAGRTYKWWGK 8640

Indonesia-88065 TTYCRYATCRCCAYKMYTGTWTAAYTCRAGAMTTAKYRWRMRAAGYCAATAGRTYKWWGK 8640

. . . \* . \* : \* \* \* \* . \* \* \* : . . . .

Bhutan-09015 YWYACARRRWCSGMTARGRWRWRWAMRTTYCSACRTRYRTMGWGRCKKTTRCCAGMRM 8700

Bhutan-09024 YWYACARRRWCSGMTARGRWRWRWAMRTTYCSACRTRYRTMGWGRCKKTTRCCAGMRM 8700

Bhutan-09027 YWYACARRRWCSGMTARGRWRWRWAMRTTYCSACRTRYRTMGWGRCKKTTRCCAGMRM 8700

Bhutan-09030 YWYACARRRWCSGMTARGRWRWRWAMRTTYCSACRTRYRTMGWGRCKKTTRCCAGMRM 8700

Bhutan-09005 CAYRMWGRRTYCRCYWRGGWCRWRWMAYYTYCMYRKRTRKCRWGRTKGAYAYRAMAKA 8700

Indonesia-88035 CACRMWGRRTYCRCCWRAGAMRWRWMAYYTYCMYRKRTRKCRWRSRTKGTYGCCAAMAKA 8700

Indonesia-88045 CACRMWGRRTYCRCCWRAGAMRWRWMAYYTYCMYRKRTRKCRWRSRTKGTYGCCAAMAKA 8700

Indonesia-88065 CAYRMWGGGTYCRCYWRGGACRWRWMAYYTYCMYRKRTRKCRWGRTKGAYAYRAMAKA 8700

. \* . \* \* \* \* . \* . \* . \* \* \* : . \* .

Bhutan-09015 MAYMRWKGRYCYRCATGRGGAGTSTYYTCRYATMGAWGYAYYSYGRYWGRRYRRYGCYK 8760

Bhutan-09024 MAYMRWKGRYCYRCATGRGGAGTSTYYTCRYATMGAWGYAYYSYGRYWGRRYRRYGCYK 8760





Indonesia-88045 SRAAYATKWSKGGTCRRGCAYARCRRRYRKMKYCWTAWGWYRYAMSAYGKYSYCCRAM 9060  
Indonesia-88065 SRARYATKWSKGGTCRRGCAYARCRRRYRKMKYCWTAWGWYRYAMSAYGKYSYCCRAM 9060  
.\* . \* . . \* \*\*\* \*\* . \* \* \*. \* . . \* \*

Bhutan-09015 GGTWYWKWTGGCSWWRMTTATTTGGMKTATCAAAYRAAWACTCWTRYKSRMYAYYGRY 9120  
Bhutan-09024 GGTWYWKWTGGCSWWRMTTATTTGGMKTATCAAAYRAAWACTCWTRYKSRMYAYYGRY 9120  
Bhutan-09027 GGTWYWKWTGGCSWWRMTTATTTGGMKTATCAAAYRAAWACTCWTRYKSRMYAYYGRY 9120  
Bhutan-09030 GGTWYWKWTGGCSWWRMTTATTTGGMKTATCAAAYRAAWACTCWTRYKSRMYAYYGRY 9120  
Bhutan-09005 RSYWCWGAYRRTCAAARMWMMWKRRTGRIYWGRTTAMTRYYYAYGKCGMCTYTRGT 9120  
Indonesia-88035 RSYWCWGAYRRTCAAARMWMMWKRRTGRIYWGRTTAMTRYYYAYGKCGMCTYTRGT 9120  
Indonesia-88045 RSYWCWGAYRRTCAAARMWMMWKRRTGRIYWGRTTAMTRYYYAYGKCGMCTYTRGT 9120  
Indonesia-88065 RSYWCWGAYRRTCAAARMWMMWKRRTGRIYWGRTTAMTRYYYAYGKCGMCTYTRGT 9120  
. \* \* . \*\* . \* . . : \*\* \* :\*

Bhutan-09015 AYTAGKAAAWYGYTTMSCYTGWYTCRTRGWTSYTRGMCAWYIYWKWAAKRAATKAAYC 9180  
Bhutan-09024 AYTAGKAAAWYGYTTMSCYTGWYTCRTRGWTSYTRGMCAWYIYWKWAAKRAATKAAYC 9180  
Bhutan-09027 AYTAGKAAAWYGYTTMSCYTGWYTCRTRGWTSYTRGMCAWYIYWKWAAKRAATKAAYC 9180  
Bhutan-09030 AYTAGKAAAWYGYTTMSCYTGWYTCRTRGWTSYTRGMCAWYIYWKWAAKRAATKAAYC 9180  
Bhutan-09005 RTWMRGRGRWCACAGMCACKRCAKTGKRCWWSYRKTCTRWYATKWTGGTAMRYGRMYG 9180  
Indonesia-88035 RTWMRGRGRWCACAGMCACKRCAKTGKRCWWSYRKTCTRWYATKWTGGTAMRYGRMYG 9180  
Indonesia-88045 RTWMRGRGRWCACAGMCACKRCAKTGKRCWWSYRKTCTRWYATKWTGGTAMRYGRMYG 9180  
Indonesia-88065 RTWMRGRGRWCACAGMCACKRCAKTGKRCWWSYRKTCTRWYATKWTGGTAMRYGRMYG 9180  
. \* . : \* . . . \* \* \* \* \*\* \*\* . . \*

Bhutan-09015 YWKYAWRKKTKTTYAYTWGMRKMKYKACMGAYGYACGYAYAGMYRGRRAAWKMGRACW 9240  
Bhutan-09024 YWKYAWRKKTKTTYAYTWGMRKMKYKACMGAYGYACGYAYAGMYRGRRAAWKMGRACW 9240  
Bhutan-09027 YWKYAWRKKTKTTYAYTWGMRKMKYKACMGAYGYACGYAYAGMYRGRRAAWKMGRACW 9240  
Bhutan-09030 YWKYAWRKKTKTTYAYTWGMRKMKYKACMGAYGYACGYAYAGMYRGRRAAWKMGRACW 9240  
Bhutan-09005 YWTYMTATTKKYCRCYAKMGCGGTGWCASRMRYMYRYWYRRATGRRRRGRWTCGRMW 9240  
Indonesia-88035 YATYMTATTKKYCRCYAKMGCGGTGWCASRMRYMYRYWYRRATGRRRAGRWTCGRMW 9240  
Indonesia-88045 YWTYMTATTKKYCRCYAKMGCGGTGWCASRMRYMYRYWYRRATGRRRRGRWTCGRMW 9240  
Indonesia-88065 YWTYMTATTKKYCRCYAKMGCGGTGWCASRMRYMYRYWYRRATGRRRRGRWTCGRMW 9240  
\* . \* . . \* . \* \* \* \* \* \* . \* . \*

Bhutan-09015 YGKGGTKSCSCTYGGCYGTAAGYSAYCGKTRGRWRWYTWTCATSCTRTRTYRYRYTYAYWK 9300  
Bhutan-09024 YGKGGTKSCSCTYGGCYGTAAGYSAYCGKTRGRWRWYTWTCATSCTRTRTYRYRYTYAYWK 9300  
Bhutan-09027 YGKGGTKSCSCTYGGCYGTAAGYSAYCGKTRGRWRWYTWTCATSCTRTRTYRYRYTYAYWK 9300  
Bhutan-09030 YGKGGTKSCSCTYGGCYGTAAGYSAYCGKTRGRWRWYTWTCATSCTRTRTYRYRYTYAYWK 9300  
Bhutan-09005 TKGGRCKCMCYYYRRCRTARRYSTYMRGYAGGRTATGTMYRYSYGYRYTRYRTRYTRTAT 9300  
Indonesia-88035 TKGRGYKCMCYYYRRCRTARRYSTYMRGYAGGRTATGTMYRYSYGYRYTRYRTRYTRTAT 9300  
Indonesia-88045 TKGRGYKCMCYYYRRCRTARRYSTYMRGYAGGRTATGTMYRYSYGYRYTRYRTRYTRTAT 9300  
Indonesia-88065 TKGGRCKCMCYYYRRCRTARRYSTYMRGYAGGRTATGTMYRYSYGYRYTRYRTRYTRTAT 9300  
\* . . \* \*\* : \* \* \* \* \* \* \*\* .

Bhutan-09015 TTRMTTRMYKTATTYGWYKARYGACYYWTYMAYYAKAGYRAMYRRWRTKRCMYCYWGRSY 9360  
Bhutan-09024 TTRMTTRMYKTATTYGWYKARYGACYYWTYMAYYAKAGYRAMYRRWRTKRCMYCYWGRSY 9360  
Bhutan-09027 TTRMTTRMYKTATTYGWYKARYGACYYWTYMAYYAKAGYRAMYRRWRTKRCMYCYWGRSY 9360  
Bhutan-09030 TTRMTTRMYKTATTYGWYKARYGACYYWTYMAYYAKAGYRAMYRRWRTKRCMYCYWGRSY 9360  
Bhutan-09005 CGGAAGRYCTARTKCKTCKGRTRWTCWCTAMYGGMACAWCYGGTATKGYATYYWRRCT 9360  
Indonesia-88035 CGGAAGRYCTARWKCKTCKGRATTCYWCWCTAMYGGMACAWCYAGTAAKGYATYYWRRCT 9360  
Indonesia-88045 CGGAAGRYCTARWKCKTCKGRATTCYWCWCTAMYGGMACAWCYAGTAAKGYATYYWRRCT 9360  
Indonesia-88065 CGGAAGRYCTARTKCKTCKGRTRWTCWCTAMYGGMACAWCYGGTATKGYATYYWRRCT 9360  
: \* . : . \* . \* \* \* \* \* \* : \* \*\* \*

Bhutan-09015 AARATYRRGCCCATCTSGTRAAYRRRRRCGRKCSRWASTYKKAGRCTGGRTMGTMYSR 9420

Bhutan-09024 AARATYRRGCCCATCTSGTRAAYRRRRRCGRKCSRWASTYKKAGRCTGGRTMGTMYSR 9420

Bhutan-09027 AARATYRRGCCCATCTSGTRAAYRRRRRCGRKCSRWASTYKKAGRCTGGRTMGTMYSR 9420

Bhutan-09030 AARATYRRGCCCATCTSGTRAAYRRRRRCGRKCSRWASTYKKAGRCTGGRTMGTMYSR 9420

Bhutan-09005 WRAMTCRARATTTCTASACRRCCGRRGMRRATGGGWRSYKKMRAGSYKKAGCKYMC GG 9420

Indonesia-88035 WRAACCRARCTTTCTASACRRCCGRRGMRRATGGGWRSYKKMRAGSTKKAGCGYMC GG 9420

Indonesia-88045 WRAACCRARCTTTCTASACRRCCGRRGMRRATGGGWRSYKKMRAGSTKKAGCGYMC GG 9420

Indonesia-88065 WRAMTCRARATTTCTASACRRCCGRRGMAGATGGGWRSYKKMRAGSYKKAGCKYMC GG 9420

\* . : :.. \* . \*\* . . \* \* \*\* . \* .

Bhutan-09015 CYGTMRAKWYYSRGIYCTRCCTTTATTTAYARCCCGRYTTSYTSRRTYTMAYKRCYS 9480

Bhutan-09024 CYGTMRAKWYYSRGIYCTRCCTTTATTTAYARCCCGRYTTSYTSRRTYTMAYKRCYS 9480

Bhutan-09027 CYGTMRAKWYYSRGIYCTRCCTTTATTTAYARCCCGRYTTSYTSRRTYTMAYKRCYS 9480

Bhutan-09030 CYGTMRAKWYYSRGIYCTRCCTTTATTTAYARCCCGRYTTSYTSRRTYTMAYKRCYS 9480

Bhutan-09005 YSAAMARGWTTGGRCYWAAGTCWWGWCRYWRSTYYRCCYGCYGRYYARYGAAYCM 9480

Indonesia-88035 YSAAMARGWTTGGRCYWAARSTYWWGTWYAYARSYTRRCTYGCYGRYYARYGAAYCM 9480

Indonesia-88045 YSAAMARGWTTGGRCYWAARSTYWWGTWYAYASCTRRCYGCYGRYYARYGAAYCM 9480

Indonesia-88065 YSAAMARGWTTGGRCYWAAGTCWWGWCRYWRSTYYRCCYGCYGRYYARYGAAYCM 9480

.:\* \* . . \* . \* . .\*\* \* \* .

Bhutan-09015 TSMYGGSWRCGWTAGYKAYMGGTMYRKYCSMYSTRTACYACAWAGRWAAWTTYSWCSGT 9540

Bhutan-09024 TSMYGGSWRCGWTAGYKAYMGGTMYRKYCSMYSTRTACYACAWAGRWAAWTTYSWCSGT 9540

Bhutan-09027 TSMYGGSWRCGWTAGYKAYMGGTMYRKYCSMYSTRTACYACAWAGRWAAWTTYSWCSGT 9540

Bhutan-09030 TSMYGGSWRCGWTAGYKAYMGGTMYRKYCSMYSTRTACYACAWAGRWAAWTTYSWCSGT 9540

Bhutan-09005 ACCYRKSGWRYAAKRRCTGYMKGCMRGCSYSCCYGKMTYWMRWMRRRRRAKCCSTYSAW 9540

Indonesia-88035 ACCYRKSGWRYAAKRRCKAYARKYCMRGCSYSCCYGKMTYWMRWMRRRRRAKCCSTYSAW 9540

Indonesia-88045 ACCYRKSGWRYAAKRRCGAYARKYCMRGCSYSCCYGKMTYWMRWMRRRRRAKCCSTYSAT 9540

Indonesia-88065 ACCYRKSGWRYAAKRRCTGYARKYCMRGCSYSCCYGKMTYWMRWMRRRRRAKCCSTYSAT 9540

: . \* . .\*\* . . \* \* \* . . \* \* \* . \* \* .

Bhutan-09015 TAAYGTTAARAMTYYSYRAYRWYATAWSWRCAWWYAACA YGGRCGGCYWYGCRYRYWW 9600

Bhutan-09024 TAAYGTTAARAMTYYSYRAYRWYATAWSWRCAWWYAACA YGGRCGGCYWYGCRYRYWW 9600

Bhutan-09027 TAAYGTTAARAMTYYSYRAYRWYATAWSWRCAWWYAACA YGGRCGGCYWYGCRYRYWW 9600

Bhutan-09030 TAAYGTTAARAMTYYSYRAYRWYATAWSWRCAMWCAACA YGGRCGGCYWYGCRYRYWW 9600

Bhutan-09005 YRMAKWRRWYTYTTCTYGRGAYGAWTCAGAGYTCCGAMCRARCKRYTWYRYRACAT 9600

Indonesia-88035 YRMAKWRRWYTYTTCTYGRGAYGAWTCAGAGYTCCGAMCRARCKRYTWYRYRACAT 9600

Indonesia-88045 TRMAKWRRWYTYTTCTYGRGAYGAWTCAGAGYTCCGAMCRARCKRYTWYRYRACAT 9600

Indonesia-88065 TRMAKWRRWYTYTTCTYGRGAYGAWTCAGAGYTCCGAMCRARCKRYTWYRYRACAT 9600

. \* \* . \* \* . : . . . . \* \* \*

Bhutan-09015 WWKTKWRYKAGCCYRARC TTRKRKKYGYGSRYRKYRYAWYGYWGWCTTATTKTMM 9660

Bhutan-09024 WWKTKWRYKAGCCYRARC TTRKRKKYGYGSRYRKYRYAWYGYWGWCTTATTKTMM 9660

Bhutan-09027 WWKTKWRYKAGCCYRARC TTRKRKKYGYGSRYRKYRYAWYGYWGWCTTATTKTMM 9660

Bhutan-09030 WWKTKWRYKAGCCYRARC TTRKRKKYGYGSRYRKYRYAWYGYWGWCTTATTKTMM 9660

Bhutan-09005 ATSWKWAAC TRRYSTACGYAGGTRGTCRCRCRTGTYCMTCRWCGTWMMRTTAYRYKSYAA 9660

Indonesia-88035 ATYWKWAAC TRRYSTACGYAGGTRGTCRCRCRTGTYCMTCRWCRYWMMRTTAYRYKSYAA 9660

Indonesia-88045 ATYWKWAAC TRRYSTACGYAGGTRGTCRCRCRTGTYCMTCRWCRYWMMRTTAYRYKSYAA 9660

Indonesia-88065 ATSWKWAAC TRRYSTACGYAGGTRGTCRCRCRTGTYCMTCRWCGTWMMRTTAYRYKSYAA 9660

\*\* . . : . \* . \* . \* \*\* : ..

Bhutan-09015 YYGYMMRTAWAYGGGRKKCA YRTYWKYTWC TTKATATYMR YATYRAWACGCCARTTCWCM 9720

Bhutan-09024 YYGYMMRTAWAYGGGRKKCA YRTYWKYTWC TTKATATYMR YATYRAWACGCCARTTCWCM 9720

Bhutan-09027 YYGYMMRTAWAYGGGAGKCA YRTYWKYTWC TTKATATYMR YATYRAWACGCCARTTCWCM 9720

Bhutan-09030 YYGYMMRTAWAYGGGAGKCA YRTYWKYTWC TTKATATYMR YATYRAWACGCCARTTCWCM 9720

Bhutan-09005 YCGCCCGYRTWYGRGAGKCATGKTTTMYWMCCTCYGYTAATWGATGRAAYRYYGAWCTTMM 9720  
Indonesia-88035 YCGCCCGYRTWCRGRKGYRTGKTTTMYAACTCYGYTAATWGATGAAGYRYYGAWCTTMM 9720  
Indonesia-88045 YCGCCCGYRTWCRARAKGYRTGKTTTMYAACTCYGYTAATWGATGRAGYRTTGAWCTTMM 9720  
Indonesia-88065 YCRCCCGYRTWYGRGAGKCATGKTTTMYWMCCTCYGYTAATWGATGRAAYRYYGAWCTTMM 9720  
\* . . . . . : . . \*

Bhutan-09015 WTGAYMYMYCRTTCRTKGACMCCYATSCRCYRGWMMTSRRKCAMCRTYRTKMYRMCYTSY 9780  
Bhutan-09024 WTGAYMYMYSRTTTCRTKGACMCCYATSCRCYRGWMMTSRRKCAMCRTYRTKMYRMCYTSY 9780  
Bhutan-09027 WTGAYMYMYSRTTTCRTKGACMCCYATSCRCYRGWMMTSRRKCAMCRTYRTKMYRMCYTSY 9780  
Bhutan-09030 WTGAYMYMYSRTTTCRTKGACMCCYATSCRCYRGWMMTSRRKCAMCRTYRTKMYRMCYTSY 9780  
Bhutan-09005 WTGRCCATCSAOWSRKTARYASYTRWGC GTGRAAMCMRAKYWMSRKTRYGCYRCYCYTSY 9780  
Indonesia-88035 WKRRCCATCSAOWSAGTARYASYTRWSYGYTGRAAMCMRAKYWMSGKTRYGCYRCYCYTSY 9780  
Indonesia-88045 WKRRCCATCSAOWSAGTARYASYTRWSYGYTGRAAMCMRAKYWMSGKTRYGCYRCYCYTSY 9780  
Indonesia-88065 WTGRCCATCSAOWSRKTARYASYTRWGC GTGRAAMCMRAKYWMSRKTRYGCYRCYCYTSY 9780  
\* . . . . . \* \* \* \* . \* \*\* \*\*

Bhutan-09015 GAAMWYKMRMTCMGYKYACMYRRRTCGMSYRRTAAGTSYATGAKRAWGTARYRCWTSY 9840  
Bhutan-09024 GAAMWYKMRMTCMGYKYACMYRRRTCGMSYRRTAAGTSYATGAKRAWGTARYRCWTSY 9840  
Bhutan-09027 GAAMWYKMRMTCMGYKYACMRRYCGMSYRRTAAGTSYATGAKRAWGTARYRCWTSY 9840  
Bhutan-09030 GAAMWYKMRMTCMGYKYACMRRYCGMSYRRTAAGTSYATGAKRAWGTARYRCWTSY 9840  
Bhutan-09005 RGRCTTTACGMKSMATKTRYMGATYRRGTGYWWSKCYWWRWTGTAYRYWRYGKYMYSR 9840  
Indonesia-88035 RRRCTTTACGAKSMATKTRYMGATYRRGTGYWWSKCYWWRWTGTAYRYWRYGKYCYSR 9840  
Indonesia-88045 RRRCTTTACGAKSMATKTRYMGATYRRGTGYWWSKCYWWRWTGTAYRYWRYGKYMYSR 9840  
Indonesia-88065 RGRCTTTACGMKSMATKTRYMGATYRRGTGYWWSKCYWWRWTGTAYRYWRYGKYMYSR 9840  
. . . \* \* . . . \* . : \*\* \*

Bhutan-09015 TYRRAGKMRMRYRTRARAYASCA YGYTRCRGSCRTCGYKAYAAC TTYWYRRGYTG YKYW 9900  
Bhutan-09024 TYRRAGKMRMRYRTGARAYASCA YGYTRCRGSCRTCGYKAYAAC TTYWYRRGYTG YKYW 9900  
Bhutan-09027 TYRRAGKMRMRYRTRARAYASCA YGYTRCRKSCRTCGYKAYAAC TTYWYRRGYTG YKYW 9900  
Bhutan-09030 TYRRAGKMRMRYRTGARAYASCA YGYTRCRKSCRTCGYKAYAAC TTYWYRRGYTG YKYW 9900  
Bhutan-09005 YYARRKGM SRMCCRKGRGGTCSYRCKTYRSRGS MRYARYKRCMRYK KYTTGASCWTKYA 9900  
Indonesia-88035 YYARRKGM SRMCCRKGRGGTCSYRCKTYRSRGS MRYARYKRCMRYK KYTTGASCWTKYA 9900  
Indonesia-88045 YYARRKGM SRMCCRKGRGGTCSYRCKTYRSRGS MRYAGYKRCMRYK KYTTGASCWTKTA 9900  
Indonesia-88065 YYARRKGM SRMCCRKGRGGTCSYRCKTYRSRGS MRYARYKRCMRYK KYTTGASCWTKYA 9900  
\* \* \* . \* \* . . \* \* \* \* . \* . . \*

Bhutan-09015 YGGTGRTRTWTWCMY YGRGACTYMYTTYATR TAWATGATACCGAYRGRTKCTYMCKY RRY 9960  
Bhutan-09024 YGGTGRTRTWTWCMY YGRGACTYMYTTYATR TAWATGATACCGAYRGRTKCTYMCKY RRY 9960  
Bhutan-09027 YGGTGRTRTWTWCMY YGRGACTYMYTTYATR TAWATGATACCGAYRGRTKCTYMCKY RRY 9960  
Bhutan-09030 YGGTGRTRTWTWCMY YGRGACTYMYTTYATR TAWATGATACCGAYRGRTKCTYMCKY RRY 9960  
Bhutan-09005 TAKYSWGY YCTGCCYRASWY YCCYKWC RKAYMWRWKTCRY YKMTACGYKYKTAYKYGAC 9960  
Indonesia-88035 TAKYSWGY YCTGCCYRASWY YCCYKWC RKAYMWRWKTCRY YKMTACGYKYKTAYKYGAC 9960  
Indonesia-88045 TAKYSWGY YCTGCCYRASWY YCCYKWC RKAYMWRWKTCRY YKMTACGYKCTTAYKYGAC 9960  
Indonesia-88065 TAKYSWGY YCTGCCYRASWY YCCYKWC RKAYMWRWKTCRY YKMTACGYKYKTAYKYGAC 9960  
. . \* . \* . \* : \* . \*\*

Bhutan-09015 YKCGGTRY YAKRCKKCGGASGGGMRGACACGYGSCCRATMYCKMRACTTYRTGGYAKMC 10020  
Bhutan-09024 YKCGGTRY YAKRCKKCGGASGGGMRGACACGYGSCCRATMYCKMRACTTYRTGGYAKMC 10020  
Bhutan-09027 YKCGGTRY YAKRCKKCGGASGGGMRGACACGYGSCCRATMYCKMRACTTYRTGGYAKMC 10020  
Bhutan-09030 YKCGGTRY YAKRCKKCRGASGGGMRGACACGYGSCCRATMYCKMRACTTYRTGGYAKMC 10020  
Bhutan-09005 CGTKRWRT CRTGYGTSGKWKRR AATWS CYRYTCMARRGMYMTCRRYCCYTGWKKYMTMS 10020  
Indonesia-88035 CGTKRWRT CRTGYGTSGKWKRR AATG CYGYTCMARRGMYMTCRRYCCYTGWKKYMTMS 10020  
Indonesia-88045 CGTKRWRT CRTGYGTSGKWKRR AATG CYGYTCMARRGMYMTCRRYCCYTGWKKYMTMS 10020  
Indonesia-88065 CGTKRWRT CRTGYGTSGKWKRR AATWS CYRYTCMARRGMYMTCRRYCCYTGWKKYMTMS 10020

\* . . . . \* . \* \* . \* \* \* . \*

Bhutan-09015 GWGWCCAYTKGMRRRGACGGRTGWMRACYGYRYRTRRWYRYCGCGRKGTCGWYYRM 10080

Bhutan-09024 GWGWCCAYTKGMRRRGACGGRTGWMRACYGYRYRTRRWYRYCGCGRKGTCGWYYRM 10080

Bhutan-09027 GWGWCCAYTKGMRRRGACGGRTGWMRACYGYRYRTRRWYRYCGCGRKGTCGWYYRM 10080

Bhutan-09030 GWGWCCAYTKGMRRRGACGGRTGWMRACYGYRYRTRRWYRYCGCGRKGTCGWYYRM 10080

Bhutan-09005 RARASTTYCTRARRRMTSRAWTWAAGWYTYGCGAWGATYRTTSSAARGRWYATTCRM 10080

Indonesia-88035 RARASTTYCTRARRRMTSRAWTWAAGWYTYGCGAWGATYRTTSSAARGRWYATTCRM 10080

Indonesia-88045 RARASTTYCTRARRRMTSRAWTWAAGWYTYGCGAWGATYRTTSSAARGRWYATTCRM 10080

Indonesia-88065 RARASTTYCTRARRRMTSRAWTWAAGWYTYGCGAWGATYRTTSSAARGRWYATTCRM 10080

. : \* . \*\*\* . \* \* \* \*\* . . . \* . \*\*

Bhutan-09015 RYBRAKYRGRYCGTRTKRRARSRTKYTRMRMTAATRMYYGMRRYTRCASTWYTAYRSMC 10140

Bhutan-09024 RYBRAKYRGRYCGTRTKRRARSRTKYTRMRMTAATRMYYGMRRYTRCASTWYTAYRSMC 10140

Bhutan-09027 RYBRAKYRGRYCGTRTKRRARSRTKYTRMRMTAATRMYYGMRRYTRCASTWYTAYRSMC 10140

Bhutan-09030 RYBRAKYRGRYCGTRTKRRARSRTKYTRMRMTAATRMYYGMRRYTRCASTWYTAYRSMC 10140

Bhutan-09005 RYGRWKYRARCYRYAYGRARRSAYKYACAAKRRYACMCTKCRGTKAYWCCACYRYRCMA 10140

Indonesia-88035 RYGRWKYRARCYRYAYGRARRSAYKYACAAKRRYACMCTKCRGTKAYWCCACYRYRCMA 10140

Indonesia-88045 RYGRWKYRARCYRYAYGRARRSAYKYACAAKRRYACMCTKCRGTKAYWCCACYRYRCMA 10140

Indonesia-88065 RYGRWKYRARCYRYAYGRARRSAYKYACAAKRRYACMCTKCRGTKAYWCCACYRYRCMA 10140

\*\* \* \*\* \* . \* \*\* . . \* \* . . \* \* . . \*\* . .

Bhutan-09015 YGYKGGKSTCGATRWSCRYRSTMKRGAGGTTYCWTAMTRGCCTGRYRCSRAYCYRRCY 10200

Bhutan-09024 YGYKGGKSTCGATRWSCRYRSTMKRGAGGTTYCWTAMTRGCCTGRYRCSRAYCYRRCY 10200

Bhutan-09027 YGYKGGKSTCGATRWSCRYRSTMKRGAGGTTYCWTAMTRGCCTGRYRCSRAYCYRRCY 10200

Bhutan-09030 YGYKGGKSTCGATRWSCRYRSTMKRGAGGTTYCWTAMTRGCCTGRYRCSRAYCYRRCY 10200

Bhutan-09005 TKYTRASGSKSSGWAASMGACACYMKAARRAYCYWCGAKARYSWKRCRYMSGRYMCARAT 10200

Indonesia-88035 TKYTRASGSKSSGWAASMGACACYMKAARRAYCYWCGAKARYSWKRCRYMSGRYMCARAT 10200

Indonesia-88045 TKYTRASGSKSSGWAASMGACACYMKAARRAYCYWCGAKARYSWKRCRYMSGRYMCARAT 10200

Indonesia-88065 TKYTRASGSKSSGWAASMGACACYMKAARRAYCYWCGAKARYSWKRCRYMSGRYMCARAT 10200

\* . . \* \* . . . \* . \*\* . . \* . . . \* \* \* \* \* \* .

Bhutan-09015 GTTSTAYKYYSKYYMAYARKTCMAYGARGSRMYRWTRYTMGAMRWYWRRTYCYAWGR 10260

Bhutan-09024 GTTSTAYKYYSKYYMAYARKTCMAYGARGSRMYRWTRYTMGAMRWYWRRTYCYAWGR 10260

Bhutan-09027 GTTSTAYKYYSKYYMAYARKTCMAYGARGSRMYRWTRYTMGAMRWYWRRTYCYAWGR 10260

Bhutan-09030 GTTSTAYKYYSKYYMAYARKTCMAYGARGSRMYRWTRYTMGAMRWYWRRTYCYAWGR 10260

Bhutan-09005 RWYSGTKYTGSKYYATRRKYMAMYKRASGRGAACRWYGTWMRCAAYWGRWYCYRWRG 10260

Indonesia-88035 RWYSGTKYTGSKYYATRRKYMAMYKRASGRGAACRWYGTWMRCAAYWGRWYCYRWRG 10260

Indonesia-88045 RWYSGTKYTGSKYYATRRKYMAMYKRASGRGAACRWYGTWMRCAAYWGRWYCYRWRG 10260

Indonesia-88065 RWYSGTKYTGSKYYATRRKYMAMYKRASGRGAACRWYGTWMRCAAYWGRWYCYRWRG 10260

\* . . \*\* . \*\*\*\* \*\* \* . . \*\* \* \*\* \* \* \*

Bhutan-09015 AKMYTSRYYKRYTRYSMRGCTTCTTWKAWRATRAKMSRWKRKGRTTYCGTKRKRGR 10320

Bhutan-09024 AKMYTSRYYKRYTRYSMRGCTTCTTWKAWRATRAKMSRWKRKGRTTYCGTKRKRGR 10320

Bhutan-09027 AKMYTSRYYKRYTRYSMRGCTTCTTWKAWRATRAKMSRWKRKGRTTYCGTKRKRGR 10320

Bhutan-09030 AKMYTSRYYKRYTRYSMRGCTTCTTWKAWRATRAKMSRWKRKGRTTYCGTKRKRGR 10320

Bhutan-09005 MKMYTCGCCKGCCWATGAAKMYYYWYTTWWRWYGRKACGWGGRGAYACYRGRKTRGRRG 10320

Indonesia-88035 MKMYTCGCCKGCCWATGAAKMYYYWYTTWWRWYGRKACGWGGRGAYACYRGRKTRGRRG 10320

Indonesia-88045 MKMYTCGCCKGCCWATGAAKMYYYWYTTWWRWYGRKACGWGGRGAYACYRGRKTRGRRG 10320

Indonesia-88065 MKMYTCGCCKGCCWATGAAKMYYYWYTTWWRWYGRKACGWGGRGAYACYRGRKTRGRRG 10320

\*\* . . \* . . . . \*\* \* . \* \* : \*\* . \*

Bhutan-09015 AATYKRTTTKGAWTASARGRKTGATWKYMATWYRTRYMATRYYGRWKGYWYRYWWGCR 10380

Bhutan-09024 AATYKRTTTKGAWTASARGRKTGATWKYMATWYRTRYMATRYYGRWKGYWYRYWWGCR 10380

Bhutan-09027 AATTKRTTTTKGAWTASAGGRKTGATWKYMATWYRTRYMATRYYGRWKGYWYRYWWGCR 10380

Bhutan-09030 AATYKRTTTKGAWTASARGRKTGATWKYMATWYRTRYMATRYYGRWKGYWYRYWWGCR 10380

Bhutan-09005 WWWWTRYWKKRWYRGAGTRTWSWYWGCAWCCGWYATMRWAYCKGTGRWCYRRTTWWRSR 10380

Indonesia-88035 WWWWTRYWKKRWYRGAGTRTWSWYWGCAWCCGWYATMRWAYCKGTGRWCYRRTTWWRSR 10380

Indonesia-88045 WWWWTRYWKKRWYRGAGTRTWSWYWGCAWCCGWYATMRWAYCKGTGRWCYRRTTWWRSR 10380

Indonesia-88065 WWWWTRYWKKRWYRGAGTRTWSWYWGCAWCCGWYATMRWAYCKGTGRWCYRRTTWWRSR 10380

. \* \* . \* . \* \* \* \* \* \* \* \* .

Bhutan-09015 GCGTAGWWYYRCSCRYTARYKYKGRGTGARTATTACGYYYMTRTMWSKCKYSACGYTTKA 10440

Bhutan-09024 GCGTAGWWYYRCSCRYTARYKYKGRGTGARTATTWCGYYYMTRTMWSKCKYSACGYTTKA 10440

Bhutan-09027 GCGTAGWWYYRCSCRYTARYKYKGRGTGARTATTWCGYYYMTRTMWSKCKYSACGYTTKA 10440

Bhutan-09030 GCGTAGWWYYRCSCRYTARYKYKGRGTGARTATTWCGYYYMTRTMWSKCKYSACGYTTKA 10440

Bhutan-09005 KSTYMRWTTWRYCAGYCGGCTYTKGCRGTGWRYAYSCYYTCKRYMACRYTTGRYCTTYGR 10440

Indonesia-88035 KSTYMRWTTWRYCAGYCGGCTYTKGCRGTGWRYAYSCYYTCKRYMACRYTTGRYCTTYGR 10440

Indonesia-88045 KSTYMRWTTWRYCAGYCGGCTYTKGCRGTGWRYAYSCYYTCKRYMACRYTTGRYCTTYGR 10440

Indonesia-88065 KSTYMRWTTWRYCAGYCGGCTYTKGCRGTGWRYAYSCYYTCKRYMACRYTTGRYCTTYGR 10440

. : .. \* . .\* : . \*\* .\* \* . : . .

Bhutan-09015 CKGSGRGTGMMYGYRRCKYASRRGSWTSWKYRSKGTGYSCCCARYCYKSYTMRYRYYR 10500

Bhutan-09024 CKGSGRGTGMMYGYRRCKYASRRGSWTSWKYRSKGTGYSCCCARYCYKSYTMRYRYYR 10500

Bhutan-09027 CKGSGRGTGMMYGYRRCKYASRRGSWTSWKYRSKGTGYSCCCARYCYKSYTMRYRYYR 10500

Bhutan-09030 CKGSGRGTGMMYGYRRCKYASRRGSWTSWKYRSKGTGYSCCCARYCYKSYTMRYRYYR 10500

Bhutan-09005 YKRCKGRYKCMYCYRRYGCWGGGCTACTKYAGGCRYSYSMYGWACYTCKCTYAACAATG 10500

Indonesia-88035 YKRCKGRYKCMYCYRRYGCWGGGCTACTKYAGGCRYSYSMTGWACYTCKCTYAACAATG 10500

Indonesia-88045 YKRCKGRYKCMYCCRRYGCWGGGCTACTKYAGGCRYSYSMTGWACYTCKCTYAACAATG 10500

Indonesia-88065 YKRCKGRYKCMYCYRRYGCWGGGCTACTKYAGGCRYSYSMYGWACYTCKCTYAACAATG 10500

\* . \*\* \*\* . . : . \*\* . \*\* \*

Bhutan-09015 ACYWRTTRGRWCTRAASRKRITYAGAYRWMRGAYRGYAYYYAGYGRMTKMYMYKKTGMCCA 10560

Bhutan-09024 ACYWRTTRGRWCTRAASRKRITYAGAYRWMRGAYRGYAYYYAGYGRMTKMYMYKKTGMCCA 10560

Bhutan-09027 ACYWRTTRGRWCTRAASRKRITYAGAYRWMRGAYRGYAYYYAGYGRMTKMYMYKKTGMCCA 10560

Bhutan-09030 ACYWRTTRGRWCTRAASRKRITYAGAYRWMRGAYRGYAYYYAGYGRMTKMYMYKKTGMCCA 10560

Bhutan-09005 WGYAGYARAWYWGRCGAKAGTCRRYRTMACRYARCWTCTRAYRRCCKYMYCKKTAAMAYR 10560

Indonesia-88035 WGYAGYARAWYWGRCGAKAGTCRRYRTMACRYARCWTCTRAYRRCCKYMYCKKTAAMAYR 10560

Indonesia-88045 WGYAGYARAWYWGRCGAKAGTCRRYRTMACRYARCWTCTRAYRRCCKYMYCKKTAAMAYR 10560

Indonesia-88065 WGYAGYARAWYWGRCGAKAGTCRRYRTMACRYARCWTCTRAYRRCCKYMYCKKTAAMAYR 10560

\* .. \* . \* \* \* . \* \* \* \* \* \*

Bhutan-09015 TKRTYTYKYCARYTMRCTTRYTTYKCTRGAMWYCCYRWRYCWATSRYSACTSAAYGCTA 10620

Bhutan-09024 TKRTYTYKYCARYTMRCTTRYTTYKCTRGAMWYCCYRWRYCWATSRYSACTSAAYGCTA 10620

Bhutan-09027 TKRTYTYKYCARYTMRCTTRYTTYKCTRGAMWYCCYRWRYCWATSRYSACTSAAYGCTA 10620

Bhutan-09030 TKRTYTYKYCARYTMRCTTRYTTYKCTRGAMWYCCYRWRYCWATSRYSACTSAAYGCTA 10620

Bhutan-09005 YKRYYYYKCCWRTYAATKYGCYWCYKRRMMTYTACTATGCTTACSRYSTCYGRATSCYT 10620

Indonesia-88035 TKRYYYYGCSARTYAATKYGCYWCYKRRMMTYTACTATGCTTMCSTRYSTMYGGRTSSYT 10620

Indonesia-88045 TKRYYYYGCSARTYAATKYGCYWCYKRRMMTYTACTATGCTTMCSTRYSTMYGGRTSSYT 10620

Indonesia-88065 YKRYYYYKCCWRTYAATKYGCYWCYKRRMMTYTACTATGCTTACSRYSTCYGRATSCYT 10620

\*\* \* \* . \* . \* . \* \* . \*\*\*\*: . . :

Bhutan-09015 RCRCWAAAYWTCACGAAYWRRGYWCYAGRYKACRYTACTKAAYMMGTRYGCRSAYCTGGA 10680

Bhutan-09024 RCRCWAAAYWTCACGAAYWRRGYWCYAGRYKACRYTACTKAAYMAGTRYGCRSAYCTGGA 10680

Bhutan-09027 ACRCWAAAYWTCACGAAYWRRGYWCYAGRYKACRYTACTKAAYMAGTRYGCRSAYCTGGA 10680

Bhutan-09030 RCRCWAAAYWTCACGAAYWRRGYWCYAGRYKACRYTACTKAAYMMGTRYGCRSAYCTGGA 10680

Bhutan-09005 GYAYWRWWYAWYRYKRRRTARARYTSTRKATMMATWCTYGRRTAAATGYRYGGRTSYKRR 10680

Indonesia-88035 GYAYWRWWYAWYRYKRRRTARARYTSTRKATMMATWCTYGRRYMARWRYGYGGRTSYKRR 10680



Bhutan-09015 RMYRARRSKCTWRRCCWMMWSRCGYGGWYWCGRSWTRGAWCTSMTRYRAGATARMRYRAG 11040  
 Bhutan-09024 RMYRARRSKCTWRRCCWMMWSRCGYGGWYWCGRSWTRGAWCTSMTRYRAGATARMRYRAG 11040  
 Bhutan-09027 RMYRARRSKCTWRRCCWMMWSRCGYGGWYWCGRSWTRGAWCTSMTRYRAGATARMRYRAG 11040  
 Bhutan-09030 RMYRARRSKCTWRRCCWMMWSRCGYGGWYWCGRSWTRGAWCTSMTRYRAGATARMRYRAG 11040  
 Bhutan-09005 RCGRRGGYYTGRSSTAASGYACTRATYYASRSTKGCWYCCYRYYRKKWYGGAGYAWR 11040  
 Indonesia-88035 RCGRRGGYYTGRSSTAASGYACTRATYYASRSTKGCWYCCYRYYRKKWYGGAGYAWR 11040  
 Indonesia-88045 RCGRRGGYYTGRSSTAASGYACTRATYYASRSTKGCWYCCYRYYRKKWYGGAGYAWR 11040  
 Indonesia-88065 RCGRRGGYYTGRSSTAASGYACTRATYYASRSTKGCWYCCYRYYRKKWYGGAGYAWR 11040  
 \* \* \* . \* . \* . : . \*\* . \* . \*\*\* . \*

Bhutan-09015 RCSKKYRSSRGRARATRAMMARTMAAYGGWCRAKRWTAGRMAYCGTTYAYYYRCTMYRGG 11100  
 Bhutan-09024 RCSKKYRSSRGRARATRAMMARTMAAYGGWCRAKRWTAGRMAYCGTTYAYYYRCTMYRGG 11100  
 Bhutan-09027 RCSKKYRSSRGRARATRAMMARTMAAYGGWCRAKRWTAGRMAYCGTTYAYYYRCTMYRGG 11100  
 Bhutan-09030 RCSKKYRSSRGRARATRAMMARTMAAYGGWCRAKRWTAGRMAYCGTTYAYYYRCTMYRGG 11100  
 Bhutan-09005 ATCGTCRCSRCGGWYRWMMRGWCMCASAYARKAAAWGMWMTMRWYWTTCGYCCGKR 11100  
 Indonesia-88035 ATCGTCRCSRCGGWYRWMMRGWCMCASAYARKAAAWGMWMTMRWYWTTCGYCCGKR 11100  
 Indonesia-88045 ATCGTCRCSRCGGWYRWMMRGWCMCASAYARKAAAWGMWMTMRWYWTTCGYCCGKR 11100  
 Indonesia-88065 ATCGTCRCSRCGGWYRWMMRGWCMCASAYARKAAAWGMWMTMRWYWTTCGYCCGKR 11100  
 . . \* . \*\* \* \*\* . . \* : \* \*\*

Bhutan-09015 RTRRKRKYATCTTGGTAMSRRWKMAAYTRATKYSSKTWKYRYPARAYSYGYKAYSGRYYA 11160  
 Bhutan-09024 RTRRKRKYATCTTGGTAMSRRWKMYRTRATKYSSKTWKYRYPARAYSYGYKAYSGRYYA 11160  
 Bhutan-09027 RTRRKRKYATCTTGGTAMSRRWKMYRTRATKYSSKTWKYRYPARAYSYGYKAYSGRYYA 11160  
 Bhutan-09030 RTRRKRKYATCTTGGTAMSRRWKMYRTRATKYSSKTWKYRYPARAYSYGYKAYSGRYYA 11160  
 Bhutan-09005 AYRGTRKYRYAKTRAGMCRGWKMATCGGWGTCGCTTYGYWWAWCCTKCKRCCSGTTR 11160  
 Indonesia-88035 AYRGTRKYRYAKTRAGMCRGWKMATCGGWGTCGCTTYGYWWAWCCTKCKRCCSGTTR 11160  
 Indonesia-88045 AYRGTRKYRYAKTRAGMCRGWKMATCGGWGTCGCTTYGYWWAWCCTKCKRCCSGTTR 11160  
 Indonesia-88065 AYRGTRKYRYAKTRAGMCRGWKMATCGGWGTCGCTTYGYWWAWCCTKCKRCCSGTTR 11160  
 \* . \*\*\*\* . . . \* . \*\*\* . . \* . \* \* . \* ..

Bhutan-09015 KRCTTGTRGARTYAKTTWYRYRYRMGYARTSTKYCGGYCYGYRRYRGTWYCRK 11220  
 Bhutan-09024 KRCTTGTRGARTYAKTTWYRYRYRMGYARTSTKYCGGYCYGYRRYRGTWYCRK 11220  
 Bhutan-09027 KRCTTGTRGARTYAKTTWYRYRYRMGYARTSTKYCGGYCYGYRRYRGTWYCRK 11220  
 Bhutan-09030 KRCTTGTRGARTYAKTTWYRYRYRMGYARTSTKYCGGYCYGYRRYRGTWYCRK 11220  
 Bhutan-09005 KGSYRYARRRWCKWKYWYACGYRARTWAKCYKCYAKYTCCAYRGCYRRWYAYYRK 11220  
 Indonesia-88035 KGSYRYARRRWCKWKYWYACGYRARTWAKCYKCYAKYTCCAYRGCYRRWYAYYRK 11220  
 Indonesia-88045 KGSYRYARRRWCKWKYWYACGYRARTWAKCYKCYAKYTCCAYRGCYRRWYAYYRK 11220  
 Indonesia-88065 KGSYRYARRRWCKWKYWYACGYRARTWAKCYKCYAKYTCCAYRGCYRRWYAYYRK 11220  
 \* . \* \* . \* . \* . \*\*\* \*\* . . \* \* . \* . \*\*\* \* \* \* \* \*\*

Bhutan-09015 CYRGCWTGYYYYTCYTRAGTGTGRRCRTTMRASMRGYRCTYYTATCAAYSKRYTTACG 11280  
 Bhutan-09024 CYRGCWTGYYYYTCYTRAGTGTGRRCRTTMRASMRGYRCTYYTATCAAYSKRYTTACG 11280  
 Bhutan-09027 CYRGCWTGYYYYTCYTRAGTGTGRRCRTTMRASMRGYRCTYYTATCAAYSKRYTTACG 11280  
 Bhutan-09030 CYRGCWTGYYYYTCYTRAGTGTGRRCRTTMRASMRGYRCTYYTATCAAYSKRYTTACG 11280  
 Bhutan-09005 CTARYAYRYTYKYTWGRRYRKRGMGYRYACGMCMGYRYRYCYTYMYTGCSTGTYYRSR 11280  
 Indonesia-88035 ATARYAYRYTYKYTWGRRYRKRGMGYRYACGMCMGYRYRYCYTYMYTGCSTGTYYRSR 11280  
 Indonesia-88045 ATARYAYRYTYKYTWGRRYRKRGMGYRYACGMCMGYRYRYCYTYMYTGCSTGTYYRSR 11280  
 Indonesia-88065 CTARYAYRYTYKYTWGRRYRKRGMGYRYACGMCMGYRYRYCYTYMYTGCSTGTYYRSR 11280  
 . \* \*\* . \* : . \* \* \* \* \* : . \* .

Bhutan-09015 RYSSRTMWGKCKTATYRRRKRYGYWKCYTKTYWYWGCCRAATRMTTRARTCWASCKA 11340  
 Bhutan-09024 RYSSRTMWGKCKTATYRRRKRYGYWKCYTKTYWYWGCCRAATRMTTRARTCWASCKA 11340  
 Bhutan-09027 RYSSRTMWGKCKTATYRRRKRYGYWKCYTKTYWYWGCCRAATRMTTRARTCWASCKA 11340  
 Bhutan-09030 RYSSRTMWGKCKTATYRRRKRYGYWKCYTKTYWYWGCCRAATRMTTRARTCWASCKA 11340



|                 |                                                               |       |
|-----------------|---------------------------------------------------------------|-------|
| Bhutan-09005    | RYKSRWMTSKYKYRRTGRRAGRYAYWKSCKWYKYWYAWYYRRRYRMKYYGMRYWGGYGR   | 11340 |
| Indonesia-88035 | RYKSRWMTSKYKYRWTGRRAGRYAYWKSCKWYKYWYAWYYRRRYRMKYYGMRYWGSYGA   | 11340 |
| Indonesia-88045 | RYKSRWMTSKYKYRWTGRRAGRYAYWKSCKWYKYWYAWYYRRRYRMKYYGMRYWGSYGA   | 11340 |
| Indonesia-88065 | RYKSRWMTSKYKYRRTGRRAGRYAYWKSCKWYKYWYAWYYRRRYRMKYYGMRYWGGYGR   | 11340 |
|                 | ** . ** * . * * * * * . * * * * . * * * * * * * . .           |       |
| Bhutan-09015    | CYTCRSGCAGKWSCTCGTGRYRTRTYGACTAWKGYGCCTTWCGYTKYYWAASAKYMYRTG  | 11400 |
| Bhutan-09024    | CYTYRSGCAGKWSCTCGTGRYRTRTYGACTAWKGYGCCTTWCGYTKYYWAASAKYMYRTG  | 11400 |
| Bhutan-09027    | CYTYRSGCAGKWSCTCGTGRYRTRTYGACTAWKGYGCCTTWCGYTKYYWAASAKYMYRTG  | 11400 |
| Bhutan-09030    | CYTCRSGCAGKWSCTCGTGRYRTRTYGACTAWKGYGCCTTWCGYTKYYWAASAKYMYRTG  | 11400 |
| Bhutan-09005    | YCYCRASRTAGGTSWYRWRAYRYACYRMYARTKRTRMSYKAYCYGYCARRGRGYAYRYK   | 11400 |
| Indonesia-88035 | CCYCRASRTCCKASWYRTRRYRYACYRMYARTKRTRCSYKAYCYGYCARRGRGYAYRYK   | 11400 |
| Indonesia-88045 | CCYCRASRTCCKASWYRTRRYRYACYRMYARTKRTRCSYKAYCYGYCARRGRGYAYRYK   | 11400 |
| Indonesia-88065 | YCYCRASRTAGGTSWYRWRAYRYACYRMYARTKRTRMSYKAYCYGYCARRGRGCAYRYK   | 11400 |
|                 | * . * . * * * * : * . . * * . **                              |       |
| Bhutan-09015    | CWVGRRRMKAWCWTGCMATAASSWGRMTGAAAYGYSAGYCWRRRRRGYTMGWCRTTRTRTC | 11460 |
| Bhutan-09024    | CWVGRRRMKAWCWTGCMATAASSWGRMTGAAAYGYSAGYCWRRRRRGYTMGWCRTTRTRTC | 11460 |
| Bhutan-09027    | CWVGRRRMKAWCWTGCMATAASSWGRMTGAAAYGYSAGYCWRRRRRGYTMGWCRTTRTRTC | 11460 |
| Bhutan-09030    | CWVGRRRMKAWCWTGCMATAASSWGRMTGAAAYGYSAGYCWRRRRRGYTMGWCRTTRTRTC | 11460 |
| Bhutan-09005    | MTTKARRMKGTYWYCGAMARTSCARRCCWRCKCKSMRYATAAAGRKCYCSWTGCRYRCT   | 11460 |
| Indonesia-88035 | MTTKARRMKGTYWYCGAMARTSCARRCCWRCKCKSMRYATAAAGRKCYCSWTGCRYRCT   | 11460 |
| Indonesia-88045 | MTTKARRMKGTYWYCGAMARTSCARRCCWRCKCKSMRYATAAAGRKCYCSWTGCRYRCT   | 11460 |
| Indonesia-88065 | MTTKARRMKGTYWYCGAMARTSCARRCCWRCKCKSMRYATAAAGRKCYCSWTGCRYRCT   | 11460 |
|                 | *** . * . . * : * . * * * . * * * *                           |       |
| Bhutan-09015    | KTKAMMMMMGGMYTASRRYMMAYWRTTYAACMKCATKYRACYMYTAYMWTGKAYTSGW    | 11520 |
| Bhutan-09024    | KTKAMMMMMGGMYTASRRYMMAYWRTTYAACMKCATKYRACYMYTAYMWTGKAYTSGW    | 11520 |
| Bhutan-09027    | KTKAMMMMMGGMYTASRRYMMAYWRTTYAACMKCATKYRACYMYTAYMWTGKAYTSGW    | 11520 |
| Bhutan-09030    | KTKAMMMMMGGMYTASRRYMMAYWRTTYAACMKCATKYRACYMYTAYMWTGKAYTSGW    | 11520 |
| Bhutan-09005    | KTTGCYCMCARCCCSAGCCAAMCARWKTRGYATSMGGTCAWATCYMYMTKKTGTKSGA    | 11520 |
| Indonesia-88035 | KYTGCYCMCARCCCSAGCCAAMCARWKTRRYMKSMMGGTCAACTCYMYMTKKTGTKSRA   | 11520 |
| Indonesia-88045 | KYTGCYCMCARCCCSAGCCAAMCARWKTRRYMKSMMGGTCAACTCYMYMTKKTGTKSRA   | 11520 |
| Indonesia-88065 | KTTGCYCMCARCCCSAGCCAAMCARWKTRGYATSMGGTCAWATCYMYMTKKTGTKSGA    | 11520 |
|                 | * . . * * . * * * * * . . . * * * . . . *                     |       |
| Bhutan-09015    | KARGYWGWGRYWRRTYRMYWARRYGACARTWARGYKYGRGCMYWYRGTGYACCMCTM     | 11580 |
| Bhutan-09024    | KARGYWGWGRYWRRTYRMYWARRYGACMRTWARGYKYGRGCMYWYRGTGYACCMCTM     | 11580 |
| Bhutan-09027    | KARGYWGWGRYWRRTYRMYWARRYGACMRTWARGYKYGRGCMYWYRGTGYACCMCTM     | 11580 |
| Bhutan-09030    | KARGYWGWGRYWRRTYRMYWARRYGACMRTWARGYKYGRGCMYWYRGTGYACCMCTM     | 11580 |
| Bhutan-09005    | KGGRCARWSRYWRTGYTARYTWGRGTARCARWWMRGTYKTSGYMYTCGYRYWYSMSYM    | 11580 |
| Indonesia-88035 | KGGRCARWSRYWRTGYTARCTWAGRYAGTCRWWMRATYKTSGYMYTCGCYRYWYSMSYM   | 11580 |
| Indonesia-88045 | KGGRCARWSRYWRTGYTARYTWAGRYAGTCRWWMRATYKTSGYMYTCGCYRYWYSMSYM   | 11580 |
| Indonesia-88065 | KGGRCARWSRYWRTGYTARYTWGRGTARYMRWWMRGTYKTSGYMYTCGYRYWYSASYM    | 11580 |
|                 | * . * . * * * * * * * . * * * * . * * * * * * . . *           |       |
| Bhutan-09015    | MWCYTYTYWWTGGYKSGWYRTRRMYRKYTGKGRKCARATYGRARAGCYGYTRYRYRYA    | 11640 |
| Bhutan-09024    | MWCYTYTYWWTGGYKSGWYRTRRMYRKYTGKGRKCARATYGRARAGCYGYTRYRYRYA    | 11640 |
| Bhutan-09027    | MWCYTYTYWWTGGYKSGWYRTRRMYRKYTGKGRKCARATYGRARAGCYGYTRYRYRYA    | 11640 |
| Bhutan-09030    | MWCYTYTYWWTGGYKSGWYRTRRMYRKYTGKGRKCARATYGRARAGCYGYTRYRYRYA    | 11640 |
| Bhutan-09005    | CTS YWTKTTTYKTSRTRYRCRAAYCATTYSTRRKMATCTAGGMSYRCKAYCTATCM     | 11640 |
| Indonesia-88035 | CTS YWTKTTTYKTSRTRYRCRAAYCATTYSTRRKMATCTAGGMSYRCKAYCTATCM     | 11640 |
| Indonesia-88045 | CTS YWTKTTTYKTSRTRYRCRAAYCATTYSTRRKMATCTAGGMSYRCKAYCTATCM     | 11640 |
| Indonesia-88065 | CTS YWTKTTTYKTSRTRYRCRAAYCATTYSTRRKMATCTAGGMSYRCKAYCTATCM     | 11640 |

. \* . . . \* \* \* \* . . . \* . \*

Bhutan-09015 GKYYTRAKAAYMYGTGRCGRCTGWGGCKGRRYWAMRTCCTTRGGCTCGGGRCGYWYSTY 11700

Bhutan-09024 GKYYTRAKAAYMYGTGRCGRCTGWGGCKGRRYWAMRTCCTTRGGCTCGGGRCGYWYSY 11700

Bhutan-09027 GKYYTRATAAYMYGTGRCGRCTGWGGCKGRRYWAMRTCCTTRGGCTCGGGRCGYWYSY 11700

Bhutan-09030 GKYYTRATAAYMYGTGRCGRCTGWGGCKGRRYWAMRTCCTTRGGCTCGGGRCGYWYSY 11700

Bhutan-09005 KGYCYRWSMWCATRYRGYCAMMYRWKKYKRRRTWMAKYYWRRRYGCKSTAAATWTGTC 11700

Indonesia-88035 KGYCYRWSMWCATRYRGYCAMMYRWKKYKRRRTWMAKYYWRRRYGAKSTAMATWTGTC 11700

Indonesia-88045 KGYCYRWSMWCATRYRGYCAMMYRWKKYKRRRTWMAKYYWRRRYGAKSTAMATWTGTC 11700

Indonesia-88065 KGYCYRWSMWCATRYRGYCAMMYRWKKYKRRRTWMAKYYWRRRYGCKSTAAATWTGTC 11700

\* \* . \* \* \* \* . \* . . \* . \*

Bhutan-09015 YYRACSTCRTSWRGKYTYARYGGWRWACRAYTTKTTGRGAYRRKYAGSGTGKRRGRATRY 11760

Bhutan-09024 YYRACSTCRTSWRGKYTYARYGGWRWACRAYTTKTTGRGAYRRKYAGSGTGKRRGRATRY 11760

Bhutan-09027 YYRACSTCRTSWRGKYTYARYGGWRWACRAYTTKTTGRGAYRRKYAGSGTGKRRGRATRY 11760

Bhutan-09030 YYRACSTCRTSWRGKYTYARYGGWRWACRAYTTKTTGRGAYRRKYAGSGTGKRRGRATRY 11760

Bhutan-09005 YYAGASYTRYCWAGTYKYRRCGGKRYTMRWTGCTYYRARWTGAKYRKCRKRTARSRGWAY 11760

Indonesia-88035 YYAGASYTRYCWARTYKCRACRRKRYTMRWTGCTYYRARWTGAKYRKCRKRTARSRGWAY 11760

Indonesia-88045 YYAGASYTRYCWARTYKYRACRRKRYTMRWTGCTYYRARWTGAKYRKCRKRTARSRGWAY 11760

Indonesia-88065 YYAGASYTRYCWAGTYKYRRCGGKRYTMRWTGCTYYRARWTGAKYRKCRKRTARSRGWAY 11760

\*\* . \* \* . \* . \* . \* : : \* . \* \* . . . \* . \*

Bhutan-09015 RRYSKYSACATYRYYYRAKMCSTRMYYTCRTWATAAARARCRYKKMYAAWGCYGTYSKR 11820

Bhutan-09024 RRYSKYSACATYGYYYRAKMCSTRMYYTCRTWATAAARARCRYKKMYAAWGCYGTYSKR 11820

Bhutan-09027 RRYSKYSACATYGYYYRAKMCSTRMYYTCRTWATAAARARCRYKKMYAAWGCYGTYSKR 11820

Bhutan-09030 RRYSKYSACATYGYYYRAKMCSTRMYYTCRTWATAAARARCRYKKMYAAWGCYGTYSKR 11820

Bhutan-09005 AGTSGCCGTRKYRYTTGTTCCSYGATYCCRYAGWWTRRSGYKCKTRMAYRCSYCKCR 11820

Indonesia-88035 AGTSGCCGTRKYRYTTGTTCCSYGATYCCRYAGWWTRRSGYKCKTRMAYRCSYCKCR 11820

Indonesia-88045 AGTSGCCGTRKYRYTTGTTCCSYGATYCCRYAGWWTRRSGYKCKTRMAYRCSYCKCR 11820

Indonesia-88065 AGTSGCCGTRKYRYTTGTTCCSYGATYCCRYAGWWTRRSGYKCKTRMAYRCSYCKCR 11820

. . . \* . \* \* . \* . \* \* \* . \* \*

Bhutan-09015 WCYSYMYTCTGAYYAYARRGTARTSTGGCWMTTSRWMYTRCSSGTGKKRAAYYGMCA 11880

Bhutan-09024 WCYSYMYTCTGAYYAYAAGGTARTSTGGCWMTTSRWMYTRCSSGTGKKRAAYYGMCA 11880

Bhutan-09027 WCYSYMYTCTGAYYAYARRGTARTSTGGCWMTTSRWMYTRCSSGTGKKRAAYYGMCA 11880

Bhutan-09030 WCYSYMYTCTGAYYAYARRGTARTSTGGCWMTTSRWMYTRCSSGTGKKRAAYYGMCA 11880

Bhutan-09005 AYYGYACTYTWRMYTATMAGRYRAGYRSAAMGKCAAMCYAYGCRWSKTRRAYCSASW 11880

Indonesia-88035 AYYGYACTYTWRMYTWTMAGRYRAGYRSAAMGKCAAMCYAYGCRWSKTRRAYCSASW 11880

Indonesia-88045 AYYGYACTYTWRMYTWTMAGRYRAGYRSAAMGKCAAMCYAYGCRWSKTRRAYCSASW 11880

Indonesia-88065 AYYGYACTYTWRMYTATMAGRYRAGYRSAAMGKCAAMCYAYGCRWSKTRRAYCSASW 11880

\* . \* \* . . . \* . . \* \* . \*

Bhutan-09015 KWTRGTRYKWGKTRYRWARWARTWCRYAYMGYCSRSAGAMWYARTTAWAYCTWGCWAMRRA 11940

Bhutan-09024 KWTRGTRYKWGKTRYRWARWARTWCRYAYMGYCSRSAGAMWYARTTAWAYCTWGCWAMRRA 11940

Bhutan-09027 KWTRGTRYKWGKTRYRWARWARTWCRYAYMGYCSRSAGAMWYARTTAWAYCTWGCWAMRRA 11940

Bhutan-09030 KWTRGTRYKWGKTRYRWARWARTWCRYAYMGYCSRSAGAMWYARTTAWAYCTWGCWAMRRA 11940

Bhutan-09005 GWWGKKAYKARGCRTATRRYTTRCGCARCYGSRGCRRCWYTWACWTCMCMYARYTWMAAG 11940

Indonesia-88035 GWWGKTRYKARKCRTATRRYTTRCGCARCYGSRGCRRCWYTWACWTCMCMYARYTWMAAG 11940

Indonesia-88045 GWWGKTRYKARKCRTATRRYTTRCGCARCYGSRGCRRCWYTWACWTCMCMYARYTWMAAG 11940

Indonesia-88065 GWWGKKAYKARGCRTATRRYTTRCGCARCYGSRGCRRCWYTWACWTCMCMYARYTWMAAG 11940

\* . \* \* \* \* . . . \* \* : \* . \*

Bhutan-09015 RAMYRGMWTCGAATGCTTCRYRATTKYTMKAGTMKYGTACGAARSWCGYRYYRWYMG 12000

Bhutan-09024 RAMYRGMWTCGAATGCTTCRYRATTKYTMKAGTMKYGTACGAARSWCGYRYYRWYMG 12000

|                 |                                                              |       |
|-----------------|--------------------------------------------------------------|-------|
| Bhutan-09027    | RAMYRGMWTCGAATGCTTCCRYYRMTTKYTMKAGTMKYGTACGAARSWCYRYYRWRWYMG | 12000 |
| Bhutan-09030    | RAMYRGMWTCGAATGCTTCCRYYRMTTKYTMKAGTMKYGTACGAARSWCYRYYRWRWYMG | 12000 |
| Bhutan-09005    | GRMYRRCAYRRGYKMGYYCYGACWGCTWCTWRKAGCKYGYSTRRCAMKYGGCRRTYMA   | 12000 |
| Indonesia-88035 | GGMYRRCAYRRGYKMGYYCYGACWGCTWCTWRKAGCKYGYSTRRCAMKYGGCRRTYMA   | 12000 |
| Indonesia-88045 | GGMYRRCAYRRGYKMGYYCYGACWGCTWCTWRKAGCKYGYSTRRCAMKYGGCRRTYMA   | 12000 |
| Indonesia-88065 | GRMYRRCAYRRGYKMGYYCYGACWGCTWCTWRKAGCKYGYSTRRCAMKYGGCRRTYMA   | 12000 |
|                 | *** . * . . . . : * * ** *                                   |       |
| Bhutan-09015    | AWYYSGYYMGKGGAYGCGRCKATTMARMKYGGYRRAKKWGCARYYSYRGYCTMASRTW   | 12060 |
| Bhutan-09024    | AWYYSGYYMGKGGAYGCGRCKATTMARMKYGGYRRAKKWGCARYYSYRGYCTMASRTW   | 12060 |
| Bhutan-09027    | AWYYSGYYMGKGGAYGCGRCKATTMARMKYGGYRRAKKWGCARYYSYRGYCTMASRTW   | 12060 |
| Bhutan-09030    | AWYYSGYYMGKGGAYGCGRCKATTMARMKYGGYRRAKKWGCARYYSYRGYCTMASRTW   | 12060 |
| Bhutan-09005    | CWYYSTYCTCKGKRWTGYKAGYGRCAARGAGCGAYRRMKTATRGYYGCRSYMMWSGYA   | 12060 |
| Indonesia-88035 | CWYYSTYCTCKGKRWTGYKAGYGRCAARGAGCGAYRRMKTATRGYYGCRSYMMWSGYA   | 12060 |
| Indonesia-88045 | CWYYSTYCTCKGKRWTGYKAGYGRCAARGAGCGAYRRMKTATRGYYGCRSYMMWSGYA   | 12060 |
| Indonesia-88065 | CWYYSTYCTCKGKRWTGYKAGYGRCAARGAGCGAYRRMKTATRGYYGCRSYMMWSGYA   | 12060 |
|                 | .**** * . : .*** * . . ** . * * * *                          |       |
| Bhutan-09015    | GYRACCRMYKGRKYCAGCYGMGGKYAGTSATTWYMKYYGTGYSSTYYYSMYGGKMYGSA  | 12120 |
| Bhutan-09024    | GYRACCRMYKGRKYCAGCYGMGGKYAGTSATTWYMKYYGTGYSSTYYYSMYGGKMYGSA  | 12120 |
| Bhutan-09027    | GYRACCRMYKGRKYCAGCYGMGGKYAGTSATTWYMKYYGTGYSSTYYYSMYGGKMYGSA  | 12120 |
| Bhutan-09030    | GYRACCRMYKGRKYCAGCYGMGGKYAGTSATTWYMKYYGTGYSSTYYYSMYGGKMYGSA  | 12120 |
| Bhutan-09005    | GYRTCTAMYTSRKYTGKYRMRATCRGTGRYCTCMKTYSWYKTGGCYTYSCTGKTMKYGK  | 12120 |
| Indonesia-88035 | RYRWYTRMYTSRKYTGKYRMRATCRGTGRYCTCMKTYSWYKTGGCYTYSCTGKTMKYGK  | 12120 |
| Indonesia-88045 | RYRWYTRMYTSRKYTGKYRMRATCRGTGRYCTCMKTYSWYKTGGCYTYSCTGKTMKYGK  | 12120 |
| Indonesia-88065 | GYRTCTAMYTSRKYTGKYRMRATCRGTGRYCTCMKTYSWYKTGGCYTYSCTGKTMKYGK  | 12120 |
|                 | ** ** .*** . * * . . * . * . . * ** .** .                    |       |
| Bhutan-09015    | RYWTMGTKSTAYYGCKAYRTYRTCKWRGYGCRYRTRTRKRCWAGTCYKWGRTWATRMYG  | 12180 |
| Bhutan-09024    | RYWTMGTKSTAYYGCKAYRTYRTCKWRGYGCRYRTRTRKRCWAGTCYKWGRTWATRMYG  | 12180 |
| Bhutan-09027    | RYWTMGTKSTAYYGCKAYRTYRTCKWRGYGCRYRTRTRKRCWAGTCYKWGRTWATRMYG  | 12180 |
| Bhutan-09030    | RYWTMGTKSTAYYGCKAYRTYRTCKWRGYGCRYRTRTRKRCWAGTCYKWGRTWATRMYG  | 12180 |
| Bhutan-09005    | RYWYCGTKSCMYCTYKRYRYAKYKTGACKMTRCYAKAKGYWRAYGYTWSAKRWGMYA    | 12180 |
| Indonesia-88035 | RYAYCKYKSCMYCTYKRYRYAKYKTGACKMTRCYAKAKGYWRAYGYTWSAKRWGMYA    | 12180 |
| Indonesia-88045 | RYAYCKYKSCMYCTYKRYRYAKYKTGACKMTRCYAKAKGYWRAYGYTWSAKRWGMYA    | 12180 |
| Indonesia-88065 | RYWYCGTKSCMYCTYKRYRYAKYKTGACKMTRCYAKAKGYWRAYGYTWSAKRWGMYA    | 12180 |
|                 | ** ** * * * * . * . * . * * . ** .** . *                     |       |
| Bhutan-09015    | WMCCKWYCRMRGMTGWTRYKRAARGTGYWYGYMKRSMWTGGTYAYTWSRRCMYMACGA   | 12240 |
| Bhutan-09024    | WMCCKWYCRMRGMTGWTRYKRAARGTGYWYGYMKRSMWTGGTYAYTWSRRCMYMACGA   | 12240 |
| Bhutan-09027    | WMCCKWYCRMRGMTGWTRYKRAARGTGYWYGYMKRSMWTGGTYAYTWSRRCMYMACGA   | 12240 |
| Bhutan-09030    | WMCCKWYCRMRGMTGWTRYKRAARGTGYWYGYMKRSMWTGGTYAYTWSRRCMYMACGA   | 12240 |
| Bhutan-09005    | TCYSGWYYGARKCWRWRYRTAGRAACRCAYYSTYCTRCATYKAATRYGWSGMARCA     | 12240 |
| Indonesia-88035 | TCYSGWYYGARKCWRWRYRTAGRAACRCAYYSTYCTRCATYKAATRYGWSGMARCA     | 12240 |
| Indonesia-88045 | TCYSGWYYGARKCWRWRYRTAGRAACRCAYYSTYCTRCATYKAATRYGWSGMARCA     | 12240 |
| Indonesia-88065 | TCYSGWYYGARKCWRWRYRTAGRAACRCAYYSTYCTRCATYKAATRYGWSGMARCA     | 12240 |
|                 | . ** * * * . . ** . * .** . : * ** :                         |       |
| Bhutan-09015    | GAASCYYGACGGYGGYRSCWCCKYWTYWMYTYASKRTAYMCGCGKYYKARRKWRWG     | 12300 |
| Bhutan-09024    | GAASCYYGACGGYGGYRSCWCCKYWTYWMYTYASKRTAYMCGCGKYYKARRKWRWG     | 12300 |
| Bhutan-09027    | GAASCYYGACGGYGGYRSCWCCKYWTYWMYTYASKRTAYMCGCGKYYKARRKWRWG     | 12300 |
| Bhutan-09030    | GAASCYYGACGGYGGYRSCWCCKYWTYWMYTYASKRTAYMCGCGKYYKARRKWRWG     | 12300 |
| Bhutan-09005    | KRRYYTYKRAASTCRKTASWYATYTCACCTCYKRGKAARTAARSRGKYTTTRAGWGWC   | 12300 |
| Indonesia-88035 | KRRYYTYKRAASYCGKTASWYATCTCATCTCTYKRGKRWRMAGCRGKTTTRAGWGWC    | 12300 |

Indonesia-88045 KRRYYTYKRAASYCGKTASWYATCTCATCTTCTYKRGKRWRMTMAGCRGKTTTARAGWGWC 12300  
Indonesia-88065 KRRYYTYKRAASTCRKTASWYATYTCACCTCYKRGKAARTAAARSRGKYTTTRRAGWGWC 12300  
\* . . . \*\* . : \* . \* . . \* . \* \*

Bhutan-09015 MRRRYCGTCTAGACCGGYRYCRGMRAGKATCMKARMSAWRWSTYYMGSRYCMMYARWC 12360  
Bhutan-09024 MRRRYCGTCTAGACCGGYRYCRGMRAGKATCMKARMSAWRWSTYYMGSRYCMMYARWC 12360  
Bhutan-09027 MRRRYCGTCTAGACCGGYRYCRGMRAGKATCMKARMSAWRWSTYYMGSRYCMMYARWC 12360  
Bhutan-09030 MRRRYCGTCTAGACCGGYRYCRGMRAGKATCMKARMSAWRWSTYYMGSRYCMMYARWC 12360  
Bhutan-09005 AGGGCYTYAYGRMYATYCATYATCRWKKWWSAKRACSCWATCYYYARCGTYMMTYTAWY 12360  
Indonesia-88035 AGGGCYTYAYARMYYATYCATYATCRWKKWWSAKRACSCWATCYYYARCGTTMCTYTAWY 12360  
Indonesia-88045 AGGGCYTYAYARMYYATYCATYATCRWKKWWSAKRACSCWATCYYYARCGTTMCTYTAWY 12360  
Indonesia-88065 AGGGCYTYAYGRMYATYCATYATCRWKKWWSAKRACSCWATCYYYARCGTYMMTYTAWY 12360  
. . . \* \* \* . \* \* \* . \*\* . \* \* : \*

Bhutan-09015 RMRGYSSTARYCYTAAWCKGTYWGYRMRKAWAMYGRRSYMTGAMRGMRKYWTRKMCTR 12420  
Bhutan-09024 RMRGYSSTARYCYTAAWCKGTYWGYRMRKAWAMYGRRSYMTGAMRGMRKYWTRKMCTR 12420  
Bhutan-09027 RMRGYSSTARYCYTAAWCKGTYWGYRMRKAWAMYGRRSYMTGAMRGMRKYWTRKMCTR 12420  
Bhutan-09030 RMRGYSSTARYCYTAAWCKGTYWGYRMRKAWAMYGRRSYMTGAMRGMRKYWTRKMCTR 12420  
Bhutan-09005 ACARTCGYGATGYCMATSKTACWRYACATGATCYRRCYATRTRMAARGCYWTATMYWG 12420  
Indonesia-88035 ACRRTCSYGATGYCMRTSKTACWRYACATGATCYRRCYAYRTMAAARGCTTWTATMYWG 12420  
Indonesia-88045 ACRRTCSYGATGYCMRTSKTACWRYACATGATCYRRCYAYRTMAAARGCYWTATMYWG 12420  
Indonesia-88065 ACARTCGYGATGYCMATSKTACWRYACATGATCYRRCYATRTRMAARGCYWTATMYWG 12420  
. . . \* . \* : \* \* . . : \* \*\* \* : \* . \* . \*

Bhutan-09015 YARSTTGATCAAWAKRGAYYGSTAYARRTTSYRTAKWWKMTWGCAAGKTTKRRCKYAKRG 12480  
Bhutan-09024 YARSTTGATCAATAKRGAYTGSTAYARRTTSYRTAKWWKMTWGCAAGKTTKRRCKYAKRG 12480  
Bhutan-09027 YARSTTGATCAAWAKRGAYYGSTAYARRTTSYRTAKWWKMTWGCAAGKTTKRRCKYAKRG 12480  
Bhutan-09030 YARSTTGATCAAWAKRGAYYGSTAYARRTTSYRTAKWWKMTWGCAAGKTTKRRCKYAKRG 12480  
Bhutan-09005 YTRCCKRTAARRTGTGAGYTACWAYWRRCTSTRWRTTGMWRYRGRKYTTAATKCAKGG 12480  
Indonesia-88035 YTGCKRTACRRTGTGAGCTACTRYWRRWCSTRWRTTGMWRYRGRKYATAATKCRKGG 12480  
Indonesia-88045 YTGCKRTACRRTGTGAGCTACTRYWRRWCSTRWRTTGMWRYRGRKYATAATKCRKGG 12480  
Indonesia-88065 YTRCCKRTAARRTGTGAGYTACWAYWRRCTSTRWRTTGMWRYRGRKYTTAATKCAKGG 12480  
\* : . . : . . . . \* \*\* \* \* . \* \* \* : . \* \*

Bhutan-09015 KGTGMSTRWTWTRTRGSTTWYWWYRTYSYRKRKCSAYGYGGACTWAWWTYGRGTYWRT 12540  
Bhutan-09024 KGTGMSTRWTWTRTRGSTTWYWWYRTYSYRKRKCSAYGYGGACTWAWWTYGRGTYWRT 12540  
Bhutan-09027 KGTGMSTRWTWTRTRGSTTWYWWYRTYSYRKRKCSAYGYGGACTWAWWTYGRGTYWRT 12540  
Bhutan-09030 KGTGMSTRWTWTRTRGSTTWYWWYRTYSYRKRKCSAYGYGGACTWAWWTYGRGTYWRT 12540  
Bhutan-09005 TTKRMCYGTYYAGYGRGCWWTWTATYGCGRKRRKSCGCRCAARMYWRRTTKCKARYCTAAW 12540  
Indonesia-88035 TTKRMCYGTYYAGYGRGCWWTWTATYGCGRKRRKSCACGTARRMYWRRTTKCKARYCTAAT 12540  
Indonesia-88045 TTKRMCYGTYYAGYGRGCWWTWTATYGCGRKRRKSCACGTARRMYWRRTTKCKARYCTAAT 12540  
Indonesia-88065 TTKRMCYGTYYAGYGRGCWWTWTATYGCGRKRRKSCGCRCAARMYWRRTTKCKARYCTAAW 12540  
. . \* . . \* \* \* . \* . \* . \*

Bhutan-09015 AWMYMASWTRMTTWTCTKTKSMCRYTTTTYKRAWYGRGGCTARWYYRCAMRGKYTYMR 12600  
Bhutan-09024 AWMYMASWTRMTTWTCTKTKSMCRYTTTTYKRAWYGRGGCTARWYYRCAMRGKYTYMR 12600  
Bhutan-09027 AWMYMASWTRMTTWTCTKTKSMCRYTTTTYKRAWYGRGGCTARWYYRCAMRGKYTYMR 12600  
Bhutan-09030 AWMYMASWTRMTTWTCTKTKSMCRYTTTTYKRAWYGRGGCTARWYYRCAMRGKYTYMR 12600  
Bhutan-09005 RACYMMSWYRMKTYATWGCAYGYWWCYKRRWCAAGGAYWRRWYRYWCARKCGAAA 12600  
Indonesia-88035 AACYMMSWYRMKTYATWGCAYGYWWCYKRRWCAARRAYWRRWYRYWCARKCKWMA 12600  
Indonesia-88045 AACYMMSWYRMKTYATWGCAYGYWWCYKRRWCAAGRAYWRRWYRYWCARKCKWMA 12600  
Indonesia-88065 RACYMMSWYRMKTYATWGCAYGYWWCYKRRWCAAGGAYWRRWYRYWCARKCGAAA 12600  
\* \* \* \* . . . \* \* \* \* . . \* \* \* \* \*

Bhutan-09015 CCRCYCGRMYSCTRARARYCYTRARATWKWRCTCATRYAAAGRGRTTKYACRYMCAYSMCY 12660  
 Bhutan-09024 CCRCYCGRMYSCTRARARYCYTRARATWKWRCTCATRYAAAGARRTKYACRYMCAYSMCY 12660  
 Bhutan-09027 CCRCYCGRMYSCTRARARYCYTRARATWKWRCTCATRYAAAGARRTKYACRYMCAYSMCY 12660  
 Bhutan-09030 CCRCYCGRMYSCTRARARYCYTRARATWKWRCTCATRYAAAGRGRTTKYACRYMCAYSMCY 12660  
 Bhutan-09005 TGATSSGATGYWAAGCYCTKGRRRYATAGYWMRYGTWMTFRAGGYKGTWYAYCYRTSAMC 12660  
 Indonesia-88035 YGAYTSSGATGYWAAGCYCTKGRRRYATAGYWMRYGTWMTFRAGGYKGTWYAYCYRTSAMC 12660  
 Indonesia-88045 YGAYTSSGATGYWARRCYCTKGRRRYATAGYWMRYGTWMTFRAGGYKGTWYAYCYRTSAMC 12660  
 Indonesia-88065 TGATSSGATGYWAAGCYCTKGRRRYATAGYWMRYGTWMTFRAGGYKGTWYAYCYRTSAMC 12660

. . . \* . : . \* \*

Bhutan-09015 ASYMWTCCRGSYCMRWYCTRGWYRRSAGTTSTTACYRTRKRKYCYSWYWGTRSGYAM 12720  
 Bhutan-09024 ASYMWTCCRGSYCMRWYCTRGWYRRSAGTTSTTACYRTRKRKYCYSWYWGTRSGYAM 12720  
 Bhutan-09027 ASYMWTCCRGSYCMRWYCTRGWYRRSAGTTSTTACYRTRKRKYCYSWYWGTRSGYAM 12720  
 Bhutan-09030 ASYMWTCCRGSYCMRWYCTRGWYRRSAGTTSTTACYRTRKRKYCYSWYWGTRSGYAM 12720  
 Bhutan-09005 WGYMTWYAGRSCCSGTYYYRGTARSAAGCCCGTGCAICRGGYYSYWYTRKRSRRCRC 12720  
 Indonesia-88035 WGYMTWYAGRSCCSGTYYYRSTCGRSGGCCCGTGCAICRGGYYSYWYTRKRSRRCRC 12720  
 Indonesia-88045 WGYMTWYAGRSCCSGTYYYRSTCGRSGGCCCGTGCAICRGGYYSYWYTRKRSRRCRC 12720  
 Indonesia-88065 WGYMTWYAGRSCCSGTYYYRGTARSAAGCCCGTGCAICRGGYYSYWYTRKRSRRCRC 12720

. \*\* . \* . . \* \* . \*\* . . : \* \* \*\*\*\*\* . \*\*

Bhutan-09015 TGCKTYGYCYGTCMTACGRYCTYAMRYRRSYTYCYTCCRAYATGRYRMAAWWTYCG 12780  
 Bhutan-09024 TGCKTYGYCYGTCMTACGRYCTYAMRYRRSYTYCYTCCRAYATGRYRMAAWWTYCG 12780  
 Bhutan-09027 TGCKTYGYCYGTCMTACGRYCTYAMRYRRSYTYCYTCCRAYATGRYRMAAWWTYCG 12780  
 Bhutan-09030 TGCKTYGYCYGTCMTACGRYCTYAMRYRRSYTYCYTCCRAYATGRYRMAAWWTYCG 12780  
 Bhutan-09005 YKMGYYGCRYMMWYSGSTYYCYRARYRGCSTAMYTWTSRGCTRYSGCAMRATYCSR 12780  
 Indonesia-88035 YKMGYYGCRYMMWYSGSTYYCYRARYRGCSTAMYTWTSRGCTRYSGCAMRATYCSR 12780  
 Indonesia-88045 YKMGYYRCTCRYMMWYSGSTYYCYRARYRGCSTAMYTWTSRGCTRYSGCAMRATYCSR 12780  
 Indonesia-88065 YKMGYYGCRYMCMWYSGSTYYCYRARYRGCSTAMYTWTSRGCTRYSGCAMRATYCSR 12780

\* . . . \*\*\* . \* : . \* . .

Bhutan-09015 TAGGCATACAAGWARSARGKAWTRYYGWRKMYRRACRRYAGAGATYYKSYRSGCGMRKA 12840  
 Bhutan-09024 TAGGCATACAAGWARSARGKAWTRYYGWRKMYRRACRRYAGAGATYYKSYRSGCGMRKA 12840  
 Bhutan-09027 TAGGCATACAAGWARSARGKAWTRYYGWRKMYRRACRRYAGAGATYYKSYRSGCGMRKA 12840  
 Bhutan-09030 TAGGCATACAAGWARSARGKAWTRYYGWRKMYRWACYRRYAGAGATYYKSYRSGCGMRKA 12840  
 Bhutan-09005 KWKKYRWYRWGWGRGRGATMAKRTCKAAGTCTRGYCRRYARRRYTYTCTACATRWRKG 12840  
 Indonesia-88035 KWKKYRWYRWWTWRRGRGATMAKRTCKAAGTCTRGYCRRYARRRYTYTCTACATRWRKG 12840  
 Indonesia-88045 KWKKYRWYRWWTWRRGRGATMAKRTCKAAGTCTRGYCRRYARRRYTYTCTACATRWRKG 12840  
 Indonesia-88065 KWKKYRWYRWGWGRGRGATMAKRTCKAAGTCTRGYCRRYARRRYTYTCTACATRWRKG 12840

. . \* \* . . \* \* \* \* . \* . . . \*\*

Bhutan-09015 WYYTGGCYKGYGTRWGMKRYCRMTKKMYMRRCGYCGCRTYTCTWATRKYGWYTTTCCMRR 12900  
 Bhutan-09024 WYYTGGCYKGYGTRWGMKRYCRMTKKMYMRRCGYCGCRTYTCTWATRKYGWYTTTCCMRR 12900  
 Bhutan-09027 WYYTGGCYKGYGTRWGMKRYCRMTKKMYMAACGYCGCRTYTCTAATRKYGWYTTTCCMRR 12900  
 Bhutan-09030 WYYTGGCYKGYGTRWGMKRYCRMTKKMYMAACGYCGCRTYTCTWATRKTGWYTTTCCMRR 12900  
 Bhutan-09005 TCTYRRYCYKRYRARKMGACYGMWTGMTMGATACTRYRATYCYAGARKTKTCAKSMGR 12900  
 Indonesia-88035 TCTYRRYCYKRYRARKMGACYGMWTGMTMGRTACTRYRATYCYAGARKTKTCAKSMGR 12900  
 Indonesia-88045 TCTYRRYCYKRYRARKMGACYGMWTGMTMGRTACTRYRATYCYAGARKTKTCAKSMGR 12900  
 Indonesia-88065 TCTYRRYCYKRYRARKMGACYGMWTGMTMGRTACTRYRATYCYAGARKTKTCAKSCMGR 12900

\*\* \* \*\* \* . \* \* . \* : . : \*\* : . . \* \*

Bhutan-09015 CAKYGRRACRGTWCMGTWGYTCYMYRYCKGKGMYYGCKSWATGYRRMWTWAATRWCGRS 12960  
 Bhutan-09024 CAKYGRRACRGTWCMGTWSTCYMYRYCKGKGMYYGCKSWATGYRRMWTWAATRWCGRS 12960  
 Bhutan-09027 CAKYGRRACRGTWCMGTWGYTCYMYRYCKGKGMYYGCKSWATGYRRMWTWAATRWCGRS 12960  
 Bhutan-09030 CAKYGRRACRGTWCMGTWYSYTCYMYRYCKGKGMYYGCKSWATGYRRMWTWAATRWCGRS 12960

|                 |                                                               |         |
|-----------------|---------------------------------------------------------------|---------|
| Bhutan-09005    | SMGTKMARRMRKTYCTYAGCGTMTMRTCTRTRCYRYRTGATYRCGACAYTRMYRWSKARS  | 12960   |
| Indonesia-88035 | SMGTKMARRMRGTTYCTYAGCGTMTMRTCTRTRCYRYRTGATYRCGACAYTRMYRWSKARS | 12960   |
| Indonesia-88045 | SMGTKMARRMRKTYCTYAGCGTMTMRTCTRTRCYRYRTGATYRCGACAYTRMYRWSKARS  | 12960   |
| Indonesia-88065 | SMGTKMARRMRKTYCTYAGCGTMTMRTCTRTRCYRYRTGATYRCGACAYTRMYRWSKARS  | 12960   |
|                 | . * * . ** . . ** .. :                                        | * . . . |
| Bhutan-09015    | ARWRRYAYYRCKTMKKGTYGTTAACGTYYYATWYAMTGACKTRCYGAYCWWMRCTRWC    | 13020   |
| Bhutan-09024    | ARWRRYAYYRCKTMKKGTYGTTAACGTYYYATWYAMTGACKTRCYGAYCWWMRCTRWC    | 13020   |
| Bhutan-09027    | ARWRRYAYYRCKTMKKGTYGTTAACGTYYYATWYAMTGACKTRCYGAYCWWMRCTRWC    | 13020   |
| Bhutan-09030    | ARWRRYAYYRCKTMKKGTYGTTAACGTYYYATWYAMTGACKTRCYGAYCWWMRCTRWC    | 13020   |
| Bhutan-09005    | RGAGRTMCCATGYCKGRWTRYCWTYRCTCYGCTCMCYRRYGGMTAGYAWCAGYAWTY     | 13020   |
| Indonesia-88035 | RGAGRTMCCATGYCKGRWTRYCWTYRCTCYGCTCMCYRRYGGMTAGYAWCAGYAWTY     | 13020   |
| Indonesia-88045 | RGAGRTMCCATGYCKGRWTRYCWTYRCTCYGCTCMCYRRYGGMTAGYAWCAGYAWTY     | 13020   |
| Indonesia-88065 | RGAGRTMCCATGYCKGRWTRYCWTYRCTCYGCTCMCYRRYGGMTAGYAWCAGYAWTY     | 13020   |
|                 | * * :                                                         | * . . * |
| Bhutan-09015    | GCKWTACGTCKCRTCRSYWCSTYKCGAMKTCGRCGGTRAWRYKYTYGTYRRKGGYRYTY   | 13080   |
| Bhutan-09024    | GCKWTACGTCKCRTCRSYWCSTYKCGAMKTCGRCGGTRAWRYKYTYGTYRRKGGYRYTY   | 13080   |
| Bhutan-09027    | GCKWTACGTCKCRTCRSYWCSTYKCGAMKTCGRCGGTRAWRYKYTYGTYRRKGGYRYTY   | 13080   |
| Bhutan-09030    | GCKWTACGTCKCRTCRSYWCSTYKCGAMKTCGRCGGTRAWRYKYTYGTYRRKGGYRYTY   | 13080   |
| Bhutan-09005    | SYKWCASKWCGYRYTGSYAYGYTSTGMKCMGSYASWGRTRYGACRYTTARGRAYGYCT    | 13080   |
| Indonesia-88035 | SYGATCSKWCGYRYTGSYAYGYTSTGMKCMGSYASWGRTRYGACRYTTARGRAYGYCT    | 13080   |
| Indonesia-88045 | SYGATCSKWCGYRYTGSYAYGYTSTGMKCMGSYASWGRTRYGACRYTTARGRAYGYCT    | 13080   |
| Indonesia-88065 | SYKWCASKWCGYRYTGSYAYGYTSTGMKCMGSYASWGRTRYGACRYTTARGRAYGYCT    | 13080   |
|                 | . . . * ** . * . . . . . *** * . * *                          |         |
| Bhutan-09015    | RGTKTGRARRYTAYWYCAACRYTCCACWRRRCGTAAAAMRRWRCYKYGWYATCAGM      | 13140   |
| Bhutan-09024    | AGTKTGRARRYTAYWYCRYACRYTACCACWRRRCGTAAAAMRRWRCYKYGWYATCAGM    | 13140   |
| Bhutan-09027    | GGTKTGRARRYTAYWYCAACRYTCCACWRRRCGTAAAAMRRWRCYKYGWYATCAGM      | 13140   |
| Bhutan-09030    | RGTKTGRARRYTAYWYCAACRYTCCACWRRRCGTAAAAMRRWRCYKYGWYATCAGM      | 13140   |
| Bhutan-09005    | GAYTWSARRRYWWYWC SAYGSACYASAWMMAGSGYGCTRAARTRMTTWTCTRYTGAC    | 13140   |
| Indonesia-88035 | GAYTWSARRRYWWYWC SAYGSACYASAWMMAGSGYGCTRAARTRMTTWTCTRYTGAC    | 13140   |
| Indonesia-88045 | GAYTWSARRRYWWYWC SAYGSACYASAWMMAGSGYGCTRAARTRMTTWTCTRYTGAC    | 13140   |
| Indonesia-88065 | GAYTWSARRRYWWYWC SAYGSACYASAWMMAGSGYGCTRAARTRMTTWTCTRYTGAC    | 13140   |
|                 | . . . *** ** . * . . . . . : * * . . .                        |         |
| Bhutan-09015    | RCYAGARRCRCTGGRMKCTCCACAASGACYWRYTWMRSRGKWWYRYRYCYTKRTYRYMCTG | 13200   |
| Bhutan-09024    | RCYAGARRCRCTGGRMKCTCCACAASGACYWRYTWMRSRGKWWYRYRYCYTKRTYRYMCTG | 13200   |
| Bhutan-09027    | RCYAGARRCRCTGGRMKCTCCACAASGACYWRYTWMRSRGKWWYRYRYCYTKRTYRYMCTG | 13200   |
| Bhutan-09030    | RCYAGARRCRCTGGRMKCTCCACAASGACYWRYTWMRSRGKWWYRYRYCYTKRTYRYMCTG | 13200   |
| Bhutan-09005    | AYCMRTGRYASWKKGCKWYRYMRCRRYWRCCMRSGSYWYTRYRSYKAYTRTMMTS       | 13200   |
| Indonesia-88035 | RYYAGAGRYASWKKGCKAWMYRYMRCRRYWRCCMRSGSYWYTRYRSYKAYTRTMMYS     | 13200   |
| Indonesia-88045 | RYYAGAGRYASWKKGCKAWMYRYMRCGRYWRCCMRSGSYWYTRYRSYKAYTRTMMYS     | 13200   |
| Indonesia-88065 | AYCMRTGRYASWKKGCKWYRYMRCRRYWRCCMRSGSYWYTRYRSYKAYTRTMMTS       | 13200   |
|                 | : * . * . . *** ** . * * . * * .                              |         |
| Bhutan-09015    | ATYKMRCCMTATCAWTARTYRYRMGCTGYWYMAARTWRMACGMKMAASTTCMRGWCGY    | 13260   |
| Bhutan-09024    | ATYKMRCCMTATCAWTARTYRYRMGCTGYWYMAARTWRMACGMKMAASTTCMRGWCGY    | 13260   |
| Bhutan-09027    | ATYKMRCCMTATCAWTARTYRYRMGCTGYWYMAARTWRMACGMKMAASTTCMRGWCGY    | 13260   |
| Bhutan-09030    | ATYKMRCCMTATCAWTARTYRYRMGCTGYWYMAARTWRMACGMKMAASTTCMRGWCGY    | 13260   |
| Bhutan-09005    | RKCGMRYCYRYTMTWTRRKTGYCAARSCATWTCAWMRCWRMMYRCRARWSCWMMACTYRY  | 13260   |
| Indonesia-88035 | RKCGMRYCCRYTMTWTRRKTGCCAARSCATWTCAWMRCWRMMYRCGARWCCAMMACTCGY  | 13260   |
| Indonesia-88045 | RKCGMRYCCRYTMTWTRRKTGCCAARSCATWTCAWMRCWRMMYRCGARWCCAMMACTCGY  | 13260   |
| Indonesia-88065 | RKCGMRYCYRYTMTWTRRKTGYCAARSCATWTCAWMRCWRMMYRCRARWSCWMMACTYRY  | 13260   |

. \*\* . \* . . \* \* \* \* . \* \*

Bhutan-09015 RAYMYAASYCTYRRRRAYYYCGCYRTACRTCWCGGGGGGYTMMRSGYRYKRRYWCWGA 13320  
 Bhutan-09024 RAYMYAASYCTYRRRRAYYYCGCYRTACRTCWCGGGGGGYTMMRSGYRYKRRYWCWGA 13320  
 Bhutan-09027 RAYMYAASYCTYRRRRAYYYCGCYRTACRTCWCGGGGGGYTMMRSGYRYKRRYWCWGA 13320  
 Bhutan-09030 RAYMYAASYCTYRRRRAYYYCGCYRTACRTCWCGGGGGGYTMMRSGYRYKRRYWCWGA 13320  
 Bhutan-09005 ATTMYTWWGTMWYRAGARCCCTAGCACMYGCTCTMRRRRRKYKAMRSSYAYTGGTWYTRG 13320  
 Indonesia-88035 ATTMYTWWGTMWYRAGARCCCTAGCACMYGCTCTMRRRRRKYKAMRSGYAYTGGTWYTRG 13320  
 Indonesia-88045 ATTMYTWWGTMWYRAGARCCCTAGCACMYGCTCTMRRRRRKYKAMRSSYAYTGGTWYTRG 13320  
 Indonesia-88065 ATTMYTWWGTMWYRAGARCCCTAGCACMYGCTCTMRRRRRKYKAMRSSYAYTGGTWYTRG 13320  
 : \*\* . \*\* . \* \* \* \* . \* .

Bhutan-09015 CTGKWRGRYYYYGRCRYWRAGTCSYKSGSKGSWRGMKTTASCCMAWTWKYGATWGCAYR 13380  
 Bhutan-09024 CTGKWRGRYYYYGRCRYWRAGTCSYKSGSKGSWRGMKTTASCCMAWTWKYGATWGCAYR 13380  
 Bhutan-09027 CTGKWRGRYYYYGRCRYWRAGTCSYKSGSKGSWRGMKTTASCCMAWTWKYGATWGCAYR 13380  
 Bhutan-09030 CTGKWRGRYYYYGRCRYWRAGTCSYKSGSKGSWRGMKTTASCCMAWTWKYGATWGCAYR 13380  
 Bhutan-09005 MCATARKRCYYAAYGYWRRRYCCTCASGRGAATCKCWGGTYAMWGATRTRATRTRMAYG 13380  
 Indonesia-88035 MCATAARKRCYYAACGYWRGAYYCCTCASGRGAATCKCWGGTYAMWGATRTRATRTRMAYG 13380  
 Indonesia-88045 MCATARKRCYYAACGYWRRRYCCTCASGRGAATCKCWGGTYAMWGATRTRATRTRMAYG 13380  
 Indonesia-88065 MCATARKRCYYAAYGYWRRRYCCTCASGRGAATCKCWGGTYAMWGATRTRATRTRMAYG 13380  
 . . \* \* \* . \* \* \* . . . . \* . \* . \*

Bhutan-09015 AMRMWYGKRRSYMSSTTRYASKKTCYYYATGKYWAAASMYGYMSRGYRMKTAMRYATMYG 13440  
 Bhutan-09024 AMRMWYGKRRSYMSSTTRYASKKTCYYYATGKYWAAASMYGYMSRGYRMKTAMRYATMYG 13440  
 Bhutan-09027 AMRMWYGKRRSYMSSTTRYASKKTCYYYATGKYWAAASMYGYMSRGYRMKTAMRYATMYG 13440  
 Bhutan-09030 AMRMWYGKRRSYMSSTTRYASKKTCYYYATGKYWAAASMYGYMSRGYRMKTAMRYATMYG 13440  
 Bhutan-09005 RMGAWCRGAASTMGAYRTGGTGGMCTYGRGTTTMMGMYSCCCGRTRMTGGCATWYCYC 13440  
 Indonesia-88035 RMGAWCRGAASTMGACRRTGGTGGMCTTGTGGTTTAMGATCCCCGRTRMTGGCATWYCYC 13440  
 Indonesia-88045 RMGAWCRGAASTMGACRRTGGTGGMCTTGTGGTTTAMGATCCCCGRTRMTGGCATWYCYC 13440  
 Indonesia-88065 RMGAWCRGAASTMGAYRTGGTGGMCTTGYRGTTAAGMYSCCCGRTRMTGGCATWYCYC 13440  
 \* \* \* \* \* : \* . . . . \* . \* \* . \*

Bhutan-09015 RTGCKWRWTRCWRMKSRYRKTGRRAGYKAAAYTWYKYWGMTRRWGACSRKCTTSCWYW 13500  
 Bhutan-09024 RTGCKWRWTRCWRMKSRYRKTGRRAGYKAAAYTWYKYWGMTRRWGAYSRWKCTTSCWYW 13500  
 Bhutan-09027 RTGCKWRWTRCWRMKSRYRKTGRRAGYKAAAYTWYKYWGMTRRWGACSRKCTTSCWYW 13500  
 Bhutan-09030 RTGCKWRWTRCWRMKSRYRKTGRRAGYKAAAYTWYKYWGMTRRWGACSRWKCTTSCWYA 13500  
 Bhutan-09005 RCSYTWGTCRYWAAATCGCRKKWCGRRYGRGYWWCACAAMKAAWRMYSGWKYKGYTTW 13500  
 Indonesia-88035 RCSYTWGTCRYWAAATCGCRKKTTCGRRYGRGYWWCACAAMKAAWGACCGWCTTGYTTW 13500  
 Indonesia-88045 RCSYTWGTCRYWAAATCGCRKKWCGRRYGRGYWWCACAAMKAAWGACCGWYKTYTTW 13500  
 Indonesia-88065 RCSYTWGTCRYWAAATCGCRKKWCGRRYGRGYWWCACAAMKAAWRMC SGWKYKGYTTA 13500  
 \* . . \* \* \* . . \* \* . \* \* . \* . . .

Bhutan-09015 CRYRMRWRRRKKTYTRTCYWTGYYYRCAKATGCGRCAASRMCAYWRSKRATARAWYWY 13560  
 Bhutan-09024 CRYRMRWRRRKKTYTRTCYWTGYYYRCAKATGCGRCAASRMCAYWRSKRATARAWYWY 13560  
 Bhutan-09027 CRYRMRWRRRKKTYTRTCYWTGYYYRCAKATGCGRCAASRMCAYWRSKRATARAWYWY 13560  
 Bhutan-09030 CRYRMRWRRRKKTYTRTCYWTGYYYRCAKATGCGRYAASRMCAYWRSKRATARAWYWY 13560  
 Bhutan-09005 YAYYAAGTGRAGKYACWRWYWYRYTGYWGRYRACWRCRMRYCTASKRGCGRMAYWM 13560  
 Indonesia-88035 YAYYAAGTGGAGKYAYWRWCCWTRYTGYWGRYRACACAAMRYCTASKRGCGRMAYWM 13560  
 Indonesia-88045 YAYYAAGTGGAGKYAYARWCCWTRYTGCWGRYRACACWACAMRYCTASKRGCGRMAYWM 13560  
 Indonesia-88065 YAYYAAGTGRAGKYACWRWYWYGYTGYWGRYRACWRCRMRYCTASKRGCGRMAYWM 13560  
 \*\* . \* . \* \* \* \* . \* \* \* \* . \* \*

Bhutan-09015 AWCRWWCTTATTTYTKYTYRRCYCYWYGYRRRRRKGYMCWWACRWRRRRTGCM 13620  
 Bhutan-09024 AWCRWWCTTATTTYTKYTYRRCYCYWYGYRRRRRKGYMCWWACRWRRRRTGCM 13620

Bhutan-09027 AWCRWWCTTATTTYTKYTTYRRCSCYYCWMYGYRRRRRKGYMCWWACRWRRRRTGCM 13620  
 Bhutan-09030 AWCRWWCTTATTTYTKYTTYRRCSCYYCWMYGYRRRRRKGYMCWWACRWRRRRTGCM 13620  
 Bhutan-09005 MWSGTAYYTAGWWTYTYTAYAAASYYYYYWMTRYCMRGAAGKYCYTTWTTTRWAGRAYSTC 13620  
 Indonesia-88035 MWSGTAYYTAGWWTYTYTAYAAASYYYYYWMTRYCMRGAAGKYCYTTWTTTRWAGRAYSTC 13620  
 Indonesia-88045 MWSGTAYYTAGWWTYTYTAYAAASYYYYYWMTRYCMRGAAGKYCYTTWTTTRWAGRAYSTC 13620  
 Indonesia-88065 MWSGTAYYTAGWWTYTYTAYAAASYYYYYWMTRYCMRGAAGKYCYTTWTTTRWAGRAYSTC 13620  
 \* . . . \* : . \*\* \* \* \* \* \* \* \* : \* \* \* \* .

Bhutan-09015 RRACMYAWWRAMRYRWKGCRYATARKCKMKYGYRKGGSWRAYAWASTTTTWTWCWCATS 13680  
 Bhutan-09024 RRACMYAWWRAMRYRWKGCRYATARKCKMKYGYRKGGSWRAYAWASTTTTWTWCWCATS 13680  
 Bhutan-09027 GRACMYAWWRAMRYRWKGCRYATARKCKMKYGYRKGGSWRAYAWASTTTTWTWCWCATS 13680  
 Bhutan-09030 RRACMYAWWRAMRYRWKGCRYATARKCKMKYGYRKGGSWRAYAWASTTTTWTWCWCATS 13680  
 Bhutan-09005 RRMATRTTGRACACRWKATRTWYMGTTGAKCRCAGRRGAATYWWRGYWWWCCWAMCCG 13680  
 Indonesia-88035 RAACATATTGRWCAYRWKATRTWYMGTTGAKCRYRGRGAATCAAASTTTWACYWAACCG 13680  
 Indonesia-88045 RAACATATTGRWCAYRWKATRTWYMGTTGAKCRYRGRGAATCAAASTTTWACYWAACCG 13680  
 Indonesia-88065 RRMATRTTGRACACRWKATRTWYMGTTGAKCRYRGRGAATYWWRGYWWWCCWAMCCG 13680  
 \* \* \* . \* . \* . : . . . . .

Bhutan-09015 YWYCYRRRARGYKYGASRWGRYRYGRCRAYCYMWACRGTIYAYRSRYRAYYTKRGKYCRAYR 13740  
 Bhutan-09024 YWYCYRRRARGYKYGASRWGRYRYGRCRAYCYMWACRGTIYAYRSRYRAYYTKRGKYCRAYR 13740  
 Bhutan-09027 YWYCYRRRARGYKYGASRWGRYRYGRCRAYCYMWACRGTIYAYRSRYRAYYTKRGKYCRAYR 13740  
 Bhutan-09030 YWYCYRRRARGYKYGASRWGRYRYGRCRAYCYMWACRGTIYAYRSRYRAYYTKRGKYCRAYR 13740  
 Bhutan-09005 CWYSYAAAGGGRYKRWGGTKRTGCRRYAGCMCATGYRKYYGCACRCRYKKTASGTYGGCA 13740  
 Indonesia-88035 CWYSYAAAGGGRYKRWGGTKRTGCRRYAGCMCATGYRKYYGCACRCRYKKTASGTYGGCA 13740  
 Indonesia-88045 CWYSYAAAGGGRYKRWGGTKRTGCRRYAGCMCATGYRKYYGCACRCRYKKTASGTYGGCA 13740  
 Indonesia-88065 CWYSYAAAGGGRYKRWGGTKRTGCRRYAGCMCATGYRKYYGCACRCRYKKTASGTYGGCA 13740  
 \* \* . \* . \* \* . . \* \* . \* \* \* \* . . . . .

Bhutan-09015 KWWWAYSACYCARAYRTRGYRAYYRMARYRYKCYAAYWSRYRCGSAWKYGMRYRGRGYS 13800  
 Bhutan-09024 KWWWAYSACYCARAYRTRGYRAYYRMARYRYKCYAAYWSRYRCGSAWKYGMRYRGRGYS 13800  
 Bhutan-09027 KWWWAYSACYCARAYRTRGYRAYYRMARYRYKCYAAYWSRYRCGSAWKYGMRYRGRGYS 13800  
 Bhutan-09030 KWWWAYSACYCARAYRTRGYRAYYRMARYRYKCYAAYWSRYRCGSAWKYGMRYRGRGYS 13800  
 Bhutan-09005 KAAWYGRRCYRGMAYRKRRCRGTGWMRCACGCCMGCSAGTAYTGWATCRCRYGRGAYC 13800  
 Indonesia-88035 KAAWYGRRCYRGMAYRKRRCRGTGWMRCACGCCMGCSAGTAYTGWATCRCRYGRGAYC 13800  
 Indonesia-88045 KAAWYGRRCYRGMAYRKRRCRGTGWMRCACGCCMGCSAGTAYTGWATCRCRYGRGAYC 13800  
 Indonesia-88065 KAAWYGRRCYRGMAYRKRRCRGTGWMRCACGCCMGCSAGTAYTGWATCRCRYGRGAYC 13800  
 \* \* \* \* . \* \* \* . \* . \* . . \* \* . \* \* \* \* . . . . .

Bhutan-09015 KYTYYYRYRWSYSYCTRRKCRCTCRYKAGARRWKRYAGCWATSAYRMAATGWRRRACYG 13860  
 Bhutan-09024 KYTYYYRYRWSYSYCTRRKCRCTCRYKAGARRWKRYAGCWATSAYRMAATGWRRRACYG 13860  
 Bhutan-09027 KYTYYYRYRWSYSYCTRRKCRCTCRYKAGARRWKRYAGCWATSAYRMAATGWRRRACYG 13860  
 Bhutan-09030 KYTYYYRYRWSYSYCTRRKCRCTCRYKAGARRWKRYAGCWATSAYRMAATGWRRRACYG 13860  
 Bhutan-09005 TCTCYRCAACTGCYCRATYRYGTRCKRWAGTGRYWRSWRCCWCRMRMYTASARGWTYR 13860  
 Indonesia-88035 TYCYRCAACTGCYCRATYRYGTRCKRWAGTGRYWRSWRCCWCRMRMYTASARGWTYR 13860  
 Indonesia-88045 TYCYRCAACTGCYCRATYRYGTRCKRWAGTGRYWRSWRCCWCRMRMYTASARGWTYR 13860  
 Indonesia-88065 TYCYRCAACTGCYCRATYRYGTRCKRWAGTGRYWRSWRCCWCRMRMYTASARGWTYR 13860  
 . \* \* \* . . . \* \* \* \* \* . \* \* . \* \* . \* \* . . .

Bhutan-09015 CKCTAKYTCSYKMTCRCSTKAYGRGAWYYYCAAYGRCAAGATSRYWKYTKTMKARRRCY 13920  
 Bhutan-09024 CKCTAKYTCSYKMTCRCSTKAYGRGAWYYYCAAYGRCAAGATSRYWKYTKTMKARRRCY 13920  
 Bhutan-09027 CKCTAKYTCSYKMTCRCSTKAYGRGAWYYYCAAYGRCAAGATSRYWKYTKTMKARRRCY 13920  
 Bhutan-09030 CKCTAKYTCSYKMTCRCSTKAYGRGAWYYYCAAYGRCAAGATSRYWKYTKTMKARRRCY 13920  
 Bhutan-09005 YKACGGCAYSYGAYARSCCKWYRGASRWYYCAWMMYRACMCARYGAWYKYYGWATWAAAYT 13920  
 Indonesia-88035 YKACGGCAYSYGAYARSCCKWYRGASRWYYCAWMMYRACMCARYGAWYKYYGWATWAAAYT 13920



|                 |                                                                 |       |
|-----------------|-----------------------------------------------------------------|-------|
| Indonesia-88045 | YKCCGKCWCCCGATARSCCKWYRGASRWYYCAWMYRACMCAATGAWYKYYGWATWAAAYT    | 13920 |
| Indonesia-88065 | YKACGKCWYSYGAYARSCCKWYRGASRWYYCAWMYRACMCARYGAWYKYYGWATWAAAYT    | 13920 |
|                 | * . . . . * . . * * . . . . * . . . . * . . . . * . . . . *     |       |
| Bhutan-09015    | MWACGTCRRRASRGCCTGGTATCGYRTKYTARYTARSRGSGTMWCTTACARRRCGGTAYK    | 13980 |
| Bhutan-09024    | MWACGTCRRRASRGCCTGGTATCGYRTKYTARYTARSRGSGTMWCTTACARRRCGGTAYK    | 13980 |
| Bhutan-09027    | MWACGTCRRRASRGCCTGGTATCGYRTKYTARYTARSRGSGTMWCTTACARRRCGGTAYK    | 13980 |
| Bhutan-09030    | MWACGTCRRRASRGCCTGGTATCGYRTKYTARYTARSRGSGTMWCTTACARRRCGGTAYK    | 13980 |
| Bhutan-09005    | MAMTTWYAGRRSRRYRYRAYRYRCAYKCWGGYARACRSCAKAAYGYCTTGGAYRRKRTG     | 13980 |
| Indonesia-88035 | CAATTWYAGRRSRRYRCAACATCGCAYKCWGGYAAACGSCAKAAYGYCTTGGAYRRKRTG    | 13980 |
| Indonesia-88045 | CAATTWYAGRRSRRYRCAACATCGCAYKCWGGYAAACGSCATAAYGYCTTGGAYRRKRTG    | 13980 |
| Indonesia-88065 | MAMTTWYAGRRSRRYRYRAYRYRCAYKCWGGYARACRSCAKAAYGYCTTGGAYRRKRTG     | 13980 |
|                 | * ** . . . * . * : . . . . . . : . . . .                        |       |
| Bhutan-09015    | TRYTTTAKSMCYRCYGAWSTTYSGRSYCAAYYYCRMTCAYRMGKACCYMSRGGWSMRSRK    | 14040 |
| Bhutan-09024    | TRYTTTAKSMCYRCYGAWSTTYSGRSYCAAYYYCRMTCAYRMGKACCYMSRGGWSMRSRK    | 14040 |
| Bhutan-09027    | TRYTTTAKSMCYRCYGAWSTTYSGRSYCAAYYYCRMTCAYRMGKACCYMSRGGWSMRSRK    | 14040 |
| Bhutan-09030    | TRYTTTAKSMCYRCYGAWSTTYSGRSYCAAYYYCRMTCAYRMGKACCYMSRGGWSMRSRK    | 14040 |
| Bhutan-09005    | CATKWTCKMATAYCRRGCYYTGSRCTMGTYYYYSACYMRTGMATGCMCCSRRRWCCAGRT    | 14040 |
| Indonesia-88035 | CATTWCTCKMATAYCRRGCYYTGSRCTMGTYYYYSACYMRTGMATGCCCCSRRRWCCAGRT   | 14040 |
| Indonesia-88045 | CATTWCTCKMATAYCRRGCYYTGSRCTMGTYYYYSACYMRTGMATGCCCCSRRRWCCAGRT   | 14040 |
| Indonesia-88065 | CATTWCTCKMATAYCRRGCYYTGSRCTMGTYYYYSACYMRTGMATGCMCCSRRRWCCAGRT   | 14040 |
|                 | . : * . * . . . . * . . . . * . . . . * . . . . * . . . . *     |       |
| Bhutan-09015    | YKCYCCAARGCRCRYWYAWSAAYRYRMYRYRKYGTWARTTYYRMMYATYATRKTTTYK      | 14100 |
| Bhutan-09024    | YKCYCCAARGCRCRYWYAWSAAYRYRMYRYRKYGTWARTTYYRMMYATYATRKTTTYK      | 14100 |
| Bhutan-09027    | YKCYCCAARGCRCRYWYAWSAAYRYRMYRYRKYGTWARTTYYRMMYATYATRKTTTYK      | 14100 |
| Bhutan-09030    | YKCYCCAARGCRCRYWYAWSAAYRYRMYRYRKYGTWARTTYYRMMYATYATRKTTTYK      | 14100 |
| Bhutan-09005    | YKACMYWWRAMGYRYWTMWSGYAYRMYASRGCATWGCATYRMMYRWYGARYGGKGYTW      | 14100 |
| Indonesia-88035 | CKACMYWWRAMGYRYWTMWSGYAYRMYASRGCATWGCATCGMMYRWYGARYGGKGYTW      | 14100 |
| Indonesia-88045 | CGACMYWWRAMGYRYWTMWSGYAYRMTASRGCATWGCATYRMMYRWYGARYGGKGYTW      | 14100 |
| Indonesia-88065 | YKACMYWWRAMGYRYWTMWSGYAYRMYASRGCATWGCATYRMMYRWYGARYGGKGYTW      | 14100 |
|                 | . * . ** * . * * * * * . . . : : * * * * . : * * . *            |       |
| Bhutan-09015    | KYAGRCRCRCYTTTCASYYYACRYAAGGTRWGRGRRRACRTAYRMCCGSSMCCGGTGSY     | 14160 |
| Bhutan-09024    | KYAGRCRCRCYTTTCASYYYACRYAAGGTRWGRGRRRACRTAYRMCCGSSMCCGGTGSY     | 14160 |
| Bhutan-09027    | KYAGRCRCRCYTTTCASYYYACRYAAGGTRWGRGRRRACRTAYRMCCGSSMCCGGYGSY     | 14160 |
| Bhutan-09030    | KYAGRCRCRCYTTTCASYYYACRYAAGGTRWGRGARRACRTAYRMCCGSSMCCGGYGSY     | 14160 |
| Bhutan-09005    | KYGTAAAGRRYYYWTSTTTYSACTRRRKRWTARGRRRTRYMYRCTYGGASSTTARTRST     | 14160 |
| Indonesia-88035 | KYGTAAAGRRYYYWTCTSTTTGSACTRRGTRWTAGRRRTRYMYRCTYGGASSTTARTGCT    | 14160 |
| Indonesia-88045 | KYGTAAAGRRYYYWTCTSTTTGSACTRRGTRWTAGRRRTRYMYRCTYRGSASTTARTRST    | 14160 |
| Indonesia-88065 | KYGTAAAGRRYYYWTSTTTYSACTRRRKRWTARGRRRTRYMYRCTYRGSASTTARTRST     | 14160 |
|                 | ** . . * * * : * . . : . ** * * * * . . . . .                   |       |
| Bhutan-09015    | GTCYRGTYCTWRRCKWYWKYRKYRGTRYSYWRMRRYTRRWSAMWYSAKMRTCTTYRMWK     | 14220 |
| Bhutan-09024    | GTCYRGTYCTWRRCKWYWKYRKYRGTRYSYWRMRRYTRRWSAMWYSAKMRTCTTYRMWK     | 14220 |
| Bhutan-09027    | GTCYRGTYCTWRRCKWYWKYRKYRGTRYSYWRMRRYTRRWSAMWYSAKMRTCTTYRMWK     | 14220 |
| Bhutan-09030    | GTCYRGTYCTWRRCKWYWKYRKYRGTRYSYWRMRRYTRRWSAMWYSAKMRTCTTYRMWK     | 14220 |
| Bhutan-09005    | ACMCGRKTYYYTGRTAGTCAYGGTRGCACSYARAGRCWRRWSTCTYGRGAAYWCCGCTK     | 14220 |
| Indonesia-88035 | ACMCGRKTYYYTGRTAGTCAYGGTRGCACSYARAGRCWRRWSTCTYGRGAAYWCCGCTK     | 14220 |
| Indonesia-88045 | ACMCGRKTYYYTGRTAGTCAYGGTRGCACSYARAGRCWRRWSTCTYGRGAAYWCCGCTK     | 14220 |
| Indonesia-88065 | ACMCGRKTYYYTGRTAGTCAYGGTRGCACSYARAGRCWRRWSTCTYGRGAAYWCCGCTK     | 14220 |
|                 | . . . * * * * * * * * * * * * * * * * * * * * * * * * * * * * * |       |

Bhutan-09015 RAYATAGRCYKRATYYCYKWTCWRCCYTYCRWGYRKSYWCCRKYWWCCGGACWTTCKRYT 14280  
 Bhutan-09024 RAYATAGRCYKRATYYCYKWTCWRCCYTYCRWGYRKSYWCCAGYWCCGGACWTTCKRYT 14280  
 Bhutan-09027 RAYATAGRCYKRATYYCYKWTCWRCCYTYCRWGYRKSYWCSRKYWWCCGGACWTTCKRYT 14280  
 Bhutan-09030 RAYATAGRCYKRATYYCYKWTCWRCCYTYCRWGYRKSYWCCAGYWCCGGACWTTCKRYT 14280  
 Bhutan-09005 RRTMWGTGACKGRYCCYCTTYGAGAMYKTSRASAYAKCCTTGGTTAAYYKKRTAYYYAGYY 14280  
 Indonesia-88035 GRTMWGTGACKGRYCCYCTTYGAGAMYKTSRASAYAKCCTTGGTTAAYYKKATAYYYAGYY 14280  
 Indonesia-88045 GRTMWGTGACKGRYCCYCTTYGAGAMYKTSRASAYAKCCTTGGTTAAYYKKATAYYYAGYY 14280  
 Indonesia-88065 RRTMWGTGACKGRYCCYCTTYGAGAMYKTSRASAYAKCCTTGGTTAAYYKKRTAYYYAGYY 14280

. . \* . \* . \* . \* . \*

Bhutan-09015 WGGMMATRYATRYCAYCKWAMMYKRRWYCMYCTTRSAYMKCATARGGYTSAMRWSTRY 14340  
 Bhutan-09024 WGGMMATRYATRYCAYCKWAMMYKRRWYCMYCTTRSAYMKCATARGGYTSAMRWSTRY 14340  
 Bhutan-09027 WGGMMATRYATRYCAYCKWAMMYKRRWYCMYCTTRSAYMKCATARGGYTSAMRWSTRY 14340  
 Bhutan-09030 WGGMMATRYATRYCAYCKWAMMYKRRWYCMYCTTRSAYMKCATARGGYTSAMRWSTRY 14340  
 Bhutan-09005 WRSCMMARTYTAACYGRTTGTTRCATKRAATYCTTTWGGGCKTGWGGARTWGMCGWGYAY 14340  
 Indonesia-88035 WASCMARTYTAACYGRTTGTTRCATKRAATYCTTTWGGGCKTGWGGARTWGMCGWGYAY 14340  
 Indonesia-88045 WRSCMMARTYTAACYGRTTGTTRCATKRAATYCTTTWGGGCKTGWGGARTWGMCGWGYAY 14340  
 Indonesia-88065 WRSCMMARTYTAACYGRTTGTTRCATKRAATYCTTTWGGGCKTGWGGARTWGMCGWGYAY 14340

\* . \* : \* . \* : : \*\* . . . \* . . . \* . \*

Bhutan-09015 CRCTAGYTRYAWRMWYCCGAGGAAYTKWGWTSRRRATYTRRYRCYYGARCAAMYACTY 14400  
 Bhutan-09024 CRCTAGYTRYAWRMWYCCGAGGAAYTKWGWTSRRRATYTRRYRCYYGARCAAMYACTY 14400  
 Bhutan-09027 CRCTAGYTRYAWRMWYCCGRRGAAYTKWGWTSRRRATYTRRYRCYYGARCAAMYACTY 14400  
 Bhutan-09030 CRCTAGYTRYAWRMWYCCGAGGAAYTKWGWTSRRRATYTRRYRCYYGARCAAMYACTY 14400  
 Bhutan-09005 SAYYRSTWRTRARMWTTSTRGRMMGTAGAGAYGGAACCTWRAYATCTSGGYTRTCTTYTC 14400  
 Indonesia-88035 SAYYRSTWRTRARMWTTSTRGRMMGTAGAGAYGGAACCTWRAYATCTSGGYTRTCTTCTC 14400  
 Indonesia-88045 SAYYRSTWRTRARMWTTSTRGRMMGTAGAGAYGGAACCTWRAYATCTSGGYTRTCTTCTC 14400  
 Indonesia-88065 SAYYRSTWRTRARMWTTSTRGRMMGTAGAGAYGGAACCTWRAYATCTSGGYTRTCTTYTC 14400

. . \* \*\*\* . : . . \* \* . . : : :

Bhutan-09015 RTARKRRKCYGKGWGRAYWKSAGGAGRWYWKKRATTAAGWGCYCCAWMMGGCTYMCRRYG 14460  
 Bhutan-09024 RTARKRRKCYGKGWGRAYWKSAGGAGRWYWKKRATTAAGWGCYCCAWMMGGCTYMCRRYG 14460  
 Bhutan-09027 RTARKRRKCYGKGWGRAYWKSAGGAGRWYWKKRATTAAGWGCYCCAWMMGGCTYMCRRYG 14460  
 Bhutan-09030 RTARKRRKCYGKGWGRAYWKSAGGAGRWYWKKRATTAAGWGCYCCAWMMGGCTYMCRRYG 14460  
 Bhutan-09005 AWRATGRKYCTSTKARAMCAKSKRMKGACWKKGMYYRRRAKYTYSRKATATWCAYAAAYR 14460  
 Indonesia-88035 AWRATGRGCCTSTKARAMCAKSKRAKACWKKGMYYRRRAKYTYSRKATATWCAYAAAYG 14460  
 Indonesia-88045 AWRATGRGCCTSTKAGAMCAKSKRAKACWKKGMYYRRRAKYTYSRKATATWCAYAAAYG 14460  
 Indonesia-88065 AWRATGRKYCTSTKARAMCAKSKRMKGACWKKGMYYRRRAKYTYSRKATATWCAYAAAYR 14460

. \* .. \*\* \*\*\* . . \*

Bhutan-09015 CCCCATRRWRKSRGGYCAAYRRMCWKWGWGKGCARRRAGYRARYTYAMYTCTGWYTMTR 14520  
 Bhutan-09024 CCCCATRRWRKSRGGYCAAYRRMCWKWGWGKGCARRRAGYRARYTYAMYTCTGWYTMTR 14520  
 Bhutan-09027 CCCCATRAWWRKSRGGYCAAYRRMCWKWGWGKGCARRRAGYRARYTYAMYTCTGWYTMTR 14520  
 Bhutan-09030 CCCCATRRWRKSRGGYCAAYRRMCWKWGWGKGCARRRAGYRARYTYAMYTCTGWYTMTR 14520  
 Bhutan-09005 ATMSWKAARGSGTRCYATTRRCYAKARWRGCGRGRGRRCCWTWATYYRWCTMYR 14520  
 Indonesia-88035 ATCCAAGAAGKSGTRCYWTTGGCYATARWRGCGRGRGRRCCWTWATYYCAACYCTA 14520  
 Indonesia-88045 ATCCAAGAAGKSGTRCYWTTGGCYATARWRGCGRGRGRRCCWTWATCTCAACYCTA 14520  
 Indonesia-88065 ATMSWKAARGSGTRCYATTRRCYAKARWRGCGRGRGRRCCWTWATCTYRWCTMYR 14520

. . . \* . \* \* \*

Bhutan-09015 GAGYARTTCTSRRTYMWAKYTYRMYRSCAGWACACATWYGGSWWRSRRTCKACRR 14580  
 Bhutan-09024 GAGYARTTCTSRRTYMWAKYTYRMYRSCAGWACACATWYGGSWWRSRRTCKACRR 14580  
 Bhutan-09027 GAGYARTTCTSRRTYMWAKYTYRMYRSCAGWACACATWYGGSWWRSRRTCKACRR 14580  
 Bhutan-09030 GAGYARTTCTSRRTYMWAKYTYRMYRSCAGWACACATWYGGSWWRSRRTCKACRR 14580

Bhutan-09005 KAGCRRYKCYGRRYYATCKTYTTRACCYSYGRWRSCYMWAYCRRCTAGSGCWMGRAAA 14580  
Indonesia-88035 KMSTARTKYGGGYYATCTTYTTAACCYRSYGRWRSCYMWAYCRRCTAGSGCTMGRAAA 14580  
Indonesia-88045 KMSTARTKYGGGYYATCTTYTTAACCYRSYGRWRSCYMWAYCRRCTAGSGCTMGRAAA 14580  
Indonesia-88065 KAGCRRYKCYGRRYYATCKTCTTRACCYSYGRTRSCYMWAYCRRCTAGSGCWMGRAAA 14580  
. \* . . \* .. \*\*\* . . . \*

Bhutan-09015 TCRWRMSAYGRRYKCKRMYSSACSGSYCGRYYYAYRRCYGRYRRRCSRYGGRASYTAWRM 14640  
Bhutan-09024 TCRWRMSAYGRRYKCKRMYSSACSGSYCGRYYYAYRRCYGRYRRRCSRYGGRASYTAWRM 14640  
Bhutan-09027 TCRWRMSAYGRRYKCKRMYSSACSGSYCGRYYYAYRRCYGRYRRRCSRYGGRASYTAWRM 14640  
Bhutan-09030 TCRWRMSAYGRRYKCKRMYSSACSGSYCGRYYYAYRRCYGRYRRRCSRYGGRASYTAWRM 14640  
Bhutan-09005 YSRTACGAYRGACGMKRCCSRMCRCSKATCTRTRAYTKACGGASCACKRRMSTGGTGA 14640  
Indonesia-88035 TCGWACGCYRGACGMKRMYSSGMCRCSKATCTRTRAYCKACAGASCACKRRACTGGTGA 14640  
Indonesia-88045 TCGWACGCYRGACGMKRMYSSGMCRCSKATCTRTRAYCKACAGASCACKRRACTGGTGA 14640  
Indonesia-88065 YSRTACGAYRGACGMKRCCSRMCRCSKATCTRTRAYTKACGGASCACKRRMSTGGTGA 14640  
. . \* \*\* . \* . \* . \* . . \*

Bhutan-09015 ARRWCYKKSARGKYMAKRCTTYRBRYGKCCASCYAKRYWATYAYRKASKWRMKMTCGYR 14700  
Bhutan-09024 ARRWCYKKSARGKYMAKRCTTYRBRYGKCCASCYAKRYWATYAYRKASKWRMKMTCGYR 14700  
Bhutan-09027 ARRWCYKKSARGKYMAKRCTTYRBRYGKCCASCYAKRYWATYAYRKASKWRMKMTCGYR 14700  
Bhutan-09030 ARRWCYKKSARGKYMAKRCTTYRBRYGKCCASCYAKRYWATYAYRKASKWRMKMTCGYR 14700  
Bhutan-09005 RRGTYAYGTCGSKYCTTRYYYTRAATRKYRGYTMKGYAACCRYRGGSKTGGCTGYKYR 14700  
Indonesia-88035 RRGTYAYGTCGSKYCTTRYYYTRAATGGTYRGYTMKGYARYCRTRGGSKTGGCTGYKYR 14700  
Indonesia-88045 RRGTYAYGTCGSKYCTTRYYYTRAATGGTYRGYTMKGYARYCRTRGGSKTGGCTGYKYR 14700  
Indonesia-88065 RRGTYAYGTCGSKYCTTRYYYTRAATRKYRGYTMKGYAACCRYRGGSKTGGCTGYKYR 14700  
\* \* \* .. \*\* : \* \* \* \* \* . \* \* \* . \*\*

Bhutan-09015 WYTAWMKCWMYCMGCCMSKATYGGSRTRCKRYKYMWYTTWGYYAAGWAMMWAGRYG 14760  
Bhutan-09024 WYTAWMKCWMYCMGCCMSKATYGGSRTRCKRYKYMWYTTWGYYAAGWAMMWAGRYG 14760  
Bhutan-09027 WYTAWMKCWMYCMGCCMSKATYGGSRTRCKRYKYMWYTTWGYYAAGWAMMWAGRYG 14760  
Bhutan-09030 WYTAWMKCWMYCMGCCMSKATYGGSRTRCKRYKYMWYTTWGYYAAGWAMMWAGRYG 14760  
Bhutan-09005 WTYRWCGYAAACYCRYYASSGRKTKTCARYGYTRYKYATTKKWTACRKTWMMARRACG 14760  
Indonesia-88035 WTYRWCGYAAACYMRYYASSGRKTKTCARYGYTRYKYATTKKWTACRKTWMMARRACR 14760  
Indonesia-88045 WTYRWCGYAAACYMRYYASSGRKTKTCARYGYTRYKYATTKKWTACRKTWMMARRACR 14760  
Indonesia-88065 WTYRWCGYAAACYCRYYASSGRKTKTCARYGYTRYKYAWTKKWTACRKTWMMARRACG 14760  
\* \* \*\* . \* . \*\*\*\* . \* : \*\*

Bhutan-09015 WYARGYWYSWRAAARWRRRYACARAYAGAYKMYKRCACRKRWRARYWAKMKCMTRGCA 14820  
Bhutan-09024 WYARRYWYSWRAAARWRRRYACARAYAGAYKMYKRCACRKRWRARYWAKMKCMTRGCA 14820  
Bhutan-09027 WYARRYWYSWRAAARWRRRYACARAYAGAYKMYKRCACRKRWRARYWAKMKCMTRGCA 14820  
Bhutan-09030 WYARRYWYSWRAAARWRRRYACARAYAGAYKMYKRCACRKRWRARYWAKMKCMTRGCA 14820  
Bhutan-09005 TCWARYWTCWACRWRWGGATCMRAMTRRRYKCMYTGGRSRGAWGARACWRTAGGAYARSG 14820  
Indonesia-88035 TCWARYWTCWACRWRWGGATCMRAMTRRRCKCMYTGGRSRGAWGARACWRTAGGAYARSG 14820  
Indonesia-88045 TCWARYWTCWACRWRWGGATCMRAMTRRRCKCMYTGGRSRGAWGARACWRTAGGAYARSG 14820  
Indonesia-88065 TCWARYWTCWACRWRWGGATCMRAMTRRRYKCMYTGGRSRGAWGARACWRTAGGAYARSG 14820  
\*\* . \* . \*\* . \* \*\* . \* \* . \*

Bhutan-09015 RRCGTRRACYRSTRYCTCYCTMYTTCRMAAWRYMRRRTYSGYTYCKTWYVWSTAKYRAC 14880  
Bhutan-09024 RRCGTRRACYRSTRYCTCYCTMYTTCRMAAWRYMRRRTYSGYTYCKTWYVWSTAKYRAC 14880  
Bhutan-09027 RRCGTRRACYRSTRYCTCYCTMYTTCRMAAWRYMRRRTYSGYTYCKTWYVWSTAKYRAC 14880  
Bhutan-09030 RRCGTRRACYRSTRYCTCYCTMYTTCRMAAWRYMRRRTYSGYTYCKTWYVWSTAKYRAC 14880  
Bhutan-09005 ARTRYRARSTRGYACYACYGYAYCYCTAARGAATCARRYGRYKTYGTYCYWGKAKYGT 14880  
Indonesia-88035 ARTRYRARSTRGTACYAYGYAYCTCTAARGAATAGGGTYGGYKTYGTYCYWGKTYGT 14880  
Indonesia-88045 ARTRYRARSTRGTACYAYGYAYCTCTAARGAATAGGGTYGGYKTYGTYCYWGKTYGT 14880  
Indonesia-88065 ARTRYRARSTRGYACYACYGYAYCYCTAARGAATCARRYGRYKTYGTYCYWGKAKYGT 14880



Bhutan-09027 SRRRGYKATWAKYAMRTMATRTSRYYYYRKRKWSKGTFRMAYRYWYCCGAGYGYAYRK 15240  
 Bhutan-09030 SRRRGYKATWAKYAMRTMATRTSRYYYYRKRKWSKGTFRMAYRYWYCCGAGYGYAYRK 15240  
 Bhutan-09005 GAGARRYKWIYWRKWAACWCGYKCGYCYACGATAAGTRARARCRTTTTYRRSTRTRYAG 15240  
 Indonesia-88035 GAGARRYKWIYWRKWAACWCGYKCGYCYACGATAACTRARARCRTTTTYRRSTRTRYAG 15240  
 Indonesia-88045 GAGARRYKWIYWRKWAACWCGYKCGYCYACGATAACTARARARCRTTTTYRRSTRTRYAG 15240  
 Indonesia-88065 GAGARRYKWIYWRKWAACWCGYKCGYCYACGATAAGTRARARCRTTTTYRRSTRTRYAG 15240  
 . \*\*\* \* . . . \* \* . . : \* \* . \*

Bhutan-09015 KGCACRYRWWRKYWWKSRAGYWYSRGTKYWCAGCSYKRRRGC SRWGCRCRACYKCYKRYT 15300  
 Bhutan-09024 KGCACRYRWWRKYWWKSRAGYWYSRGTKYWCAGCSYKRRRGC SRWGCRCRACYKCYKRYT 15300  
 Bhutan-09027 KGCACRYRWWRKYWWKSRAGYWYSRGTKYWCAGCSYKRRRGC SRWGCRCRACYKCYKRYT 15300  
 Bhutan-09030 KGCACRYRWWRKYWWKSRAGYWYSRGTKYWCAGCSYKRRRGC SRWGCRCRACYKCYKRYT 15300  
 Bhutan-09005 KRYRYRYRWTATCATGCGAYWCCRRWKYASRRMSCTKAGGRMGATGMRRGYTYCKGYC 15300  
 Indonesia-88035 KRYRYRYRWTATCATGCGAYWCCRRWKYASRRMSCTKAGGRMGATGMRRGYTYCKGYC 15300  
 Indonesia-88045 KRYRYRYRWTATCATGCGAYWCCRRWKYASRRMSCTKAGGRMGATGMRRGYTYCKGYC 15300  
 Indonesia-88065 KRYRYRYRWTATCATGCGAYWCCRRWKYASRRMSCTKAGGRMGATGMRRGYTYCKGYC 15300  
 \* \*\*\*\* . . . \*\* . \* \* . . . \* \* . \* \* \*

Bhutan-09015 GKYTGRYYWYKAWGSCCKGRYKAGCMYKATTCGRCSYCMTCYACAARRKYKR 15360  
 Bhutan-09024 GKYTGRYYWYKAWGSCCKGRYKAGCMYKATTCGRCSYCMTCYACAARRKYKR 15360  
 Bhutan-09027 GKYTGRYYWYKAWGSCCKGRYKAGCMYKATTCGRCSYCMTCYACAARRKYKR 15360  
 Bhutan-09030 GKYTGRYYWYKAWGSCCKGRYKAGCMYKATTCGRCSYCMTCYACAARRKYKR 15360  
 Bhutan-09005 AGYYKAYTACCYTRTRGMYYTYSATYTGATMTKTMCMRAYCCTMAYMTCWSRWARAKYKA 15360  
 Indonesia-88035 AGYYKAYTACCYTRTRGMYYTYSATYTGATMTKTMCMRAYCCTMAYMTCWSRWARATTKA 15360  
 Indonesia-88045 AGYYKAYTACCYTRTRGMYYTYSATYTGATMTKTMCMRAYCCTMAYATCWSRWARATTKA 15360  
 Indonesia-88065 AGYYKAYTACCYTRTRGMYYTYSATYTGATMTKTA CMRAYCCTMAYMTCWSRWARAKYKA 15360  
 . \* \* \* . . . . . . . \* \* . . . \* . \*

Bhutan-09015 YTRWMRYMRMRCGSRSAAYRYSYMRTRYMAYYKRGTGCKY YGCRWRM CARYMMWAGKCCW 15420  
 Bhutan-09024 YTRWMRYMRMRCGSRSAAYRYSYMRTRYMAYYKRGTGCKY YGCRWRM CARYMMWAGKCCW 15420  
 Bhutan-09027 YTRWMRYMRMRCGSRSAAYRYSYMRTRYMAYYKRGTGCKY YGCRWRM CARYMMWAGKCYW 15420  
 Bhutan-09030 YTRWMRYMRMRCGSRSAAYRYSYMRTRYMAYYKRGTGCKY YGCRWRM CARYMMWAGKCCW 15420  
 Bhutan-09005 TYRWMGYRMRYAGRGMCRRC SCTAAYRCMGYTKARAATGCTSYGTGATWRYMMATRKMCW 15420  
 Indonesia-88035 TYRWMGYRMRYAGRGMCRRC SCTAAYRCMGYTKARAATGCTSYGTGATWRYMMATRKCCW 15420  
 Indonesia-88045 TYRWMGYRMRYAGRGMCRRC SCTAAYRCMGYTKARAATGCTSYGTGATWRYMMATRKCCW 15420  
 Indonesia-88065 TYRWMGYRMRYAGRGMCRRC SCTAAYRCMGYTKARAATGCTSYGTGATWRYMMATRKMCW 15420  
 \*\*\* \*\*\*\* . . \* \* . . \* \* . \* : . . . \*\*\*\* : \* \*

Bhutan-09015 KGTRAAMAYRRYRGYYGYWRRYWRWACCTAYMAKYGACRYGCIYTRGGY SAYMTKARWY 15480  
 Bhutan-09024 KGTRAAMAYRRYRGYYGYWRRYWRWACCTAYMAKYGACRYGCIYTRGGY SAYMTKARWY 15480  
 Bhutan-09027 KGTRAAMAYRRYRGYYGYWRRYWRWAMYRYMAKYGACRYGCIYTRGGY SAYMTKARWY 15480  
 Bhutan-09030 KGTRAAMAYRRYRGYYGYWRRYWRWAMYRYMAKYGACRYGCIYTRGGY SAYMTKARWY 15480  
 Bhutan-09005 KRWGRWCWTAATRRTAGGYTGAGACYTMMKYTTMRYATYRARA K YCGMYTRAAT 15480  
 Indonesia-88035 TGWGRWCWTAATRRTAGAYTGAGACYTMMKYTTMRYATYRARA K YCGMYTRAAT 15480  
 Indonesia-88045 TGWGRWCWTAATRRTAGAYTGAGACYTMMKYTTMRYATYRARA K YCGMYTRAAT 15480  
 Indonesia-88065 KRWGRWCWTAATRRTAGGYTGAGACYTMMKYTTMRYATYRARA K YCGMYTRAAT 15480  
 . \* \* \* . . \* \* : \* \* . \* : \* . . . \* . \*

Bhutan-09015 CARACAKYRACYRWSGGWWCYARWGCATTARRYAWCTTRGKQWYWTRRYRARYKCCRRKGT 15540  
 Bhutan-09024 CARACAKYRACYRWSGGWWCYARWGCATTARRYAWCTTRGKQWYWTRRYRARYKCCRRKGT 15540  
 Bhutan-09027 CARACAKYRACYRWSGGWWCYARWGCATTARRYAWCTTRGKQWYWTRRYRARYKCCRRKGT 15540  
 Bhutan-09030 CARACAKYRACYRWSGGWWCYARWGCATTARRYAWCTTRGKQWYWTRRYRARYKCCRRKGT 15540  
 Bhutan-09005 YRAGYWG YARTYRWRRTATCMWKYRYWRARTRTYWKARTTTTYARCARATKSYGKRSA 15540  
 Indonesia-88035 YRAGYWG YARTCRWRRTATCMWKYRYWRARTRTYTTARTTTTYARCARATKSYGKRSA 15540

Indonesia-88045 YRAGYWGYARTCRWRRRTATCMAWKYRYWRARTRTYTTARTTTTYARCARATKSYGKRSA 15540  
Indonesia-88065 YRAGYWGYARTYRWRRRRTATCMAWKYRYWRARTRTYWKARTTTTYARCARATKSYGKRSA 15540  
. \* \*\* \* \* . . \* \* . \*\* .:

Bhutan-09015 TYYYKGMMSGRC SAYYYRWTKGATRKYRCKACYTYARSSMSAYGKRAATGTKMAYRYCY 15600  
Bhutan-09024 TYYYKGMMSGRC SAYYYRWTKGRWRKYRCKACYTYARSSMSAYGKRAATGTKMAYRYCY 15600  
Bhutan-09027 TYYYKGMMSGRC SAYYYRWTKGATRKYRCKACYTYARSSMSAYGKRAMTGTKMAYRYCY 15600  
Bhutan-09030 TYYYKGMMSGRC SAYYYRWTKGRWRKYRCKACYTYARSSMSAYGKRAMTGTKMAYRYCY 15600  
Bhutan-09005 CCTYGRMASRATCRYTGTGCKGATAKYRYKCTYYCRGSGASMTRGRRCWKWTMRCRCTTY 15600  
Indonesia-88035 CCTYGRMASRATCRYTGTGCKGATAKYGYKCTYYCRGSGACMTRGRRCWKWTMRCRCTTC 15600  
Indonesia-88045 CCTYGRMASRATCRYTGTGCKRATAKYGYKCTYYCRGSGACMTRGRRCWKWTMRCRCTTC 15600  
Indonesia-88065 CCTYGRMASRATCRYTGTGCKGATAKYRYKCTYYCRGSGASMTRGRRCWKWTMRCRCTTY 15600  
\* \* \* . \*\* \* \*\* \* . \* \* . . \* . \* \*

Bhutan-09015 AKRYTMCMKYRRTGTTGAGATTGTRYACRWYRATKRATAMTWRYWYCYCKTKRKRRTGTKW 15660  
Bhutan-09024 AKRYTMCMKYRKTGTTGAGATTGTRYACRWYRATKRATAMTWRYWYCYCKTKRKRRTGTKW 15660  
Bhutan-09027 AKRYTMCMKYRRTGTTGAGATTGTRYACRWYRATKRATAMTWRYWYCYCKTKRKRRTGTKW 15660  
Bhutan-09030 AKRYTMCMKYRRTGTTGAGATTGTRYACRWYRATKRATAMTWRYWYCYCKTKRKRRTGTKW 15660  
Bhutan-09005 RGAYYAYMKYRTRKRARRRWKKTGCMGRTYGRYKGRGCMYTATYWYYYTWGGTGKTWTT 15660  
Indonesia-88035 RGAYYAYMKYRTRKRARRRWKKTGCMGRTYGRYKGRGCMYTATYWYYYTWGGTGKTWTT 15660  
Indonesia-88045 RGAYYAYMKYRTRKRARRRWKKTGCMGRTYGRYKGRGCMYTATYWYYYTAGGTGKTWTT 15660  
Indonesia-88065 RGAYYAYMKYRTRKRARRRWKKTGCMGRTYGRYKGRGCMYTATYWYYYTWGGTGKTWTT 15660  
\* \*\*\*\*. . : . . \* \* \* . \* \*\*\*\* . . . .

Bhutan-09015 AMYAAGCARYMARWWGARRGRMYMRGWTAGSTRCYKAA YTRASGTWTRRRRYKTRYTRC 15720  
Bhutan-09024 AMYAAGCARYMARWWGARRGRMYMRGWTAGSTRCYKAA YTRASGTWTRRRRYKTRYTRC 15720  
Bhutan-09027 AMYAAGCARYMAAWWGARRGRMYMRGWTAGSTRCYKAA YTRASGTWTRRRRYKTRYTRC 15720  
Bhutan-09030 AMYAAGCARYMAAWWGARRGRMYMAGWTAGSTRCYKAA YTRASGTWTRRRRYKTRYTRC 15720  
Bhutan-09005 RATMWCYRACCGAMWARAGCRATCRKAA YMKGKASC GGTYKGGWKWYGGGGYWGCKAM 15720  
Indonesia-88035 AATAWCYRACCGRMWARAGCRATCRKAA YMKGTASC GGTYKGGWKWYGGGGYWGCKAM 15720  
Indonesia-88045 AATAWCYRACCGRMWARAGCRATCRKAA YMKGTASC GGTYKGGWKWYGGGGYWGCKAM 15720  
Indonesia-88065 RATMWCYRACCGRMWARAGCRATCRKAA YMKGKASC GGTYKGGWKWYGGGGYWGCKAM 15720  
. \* . \* . . . . : \* . \* .

Bhutan-09015 KYMY S YACTGRMTKY YGKAATSMKSRYWWSRACRRWYCY YRRYRMYRMMCTYKAYWKWR 15780  
Bhutan-09024 KYMY S MACTGRMTKY YGKAATSMKSRYWWSRACRRWYCY YRRYRMYRMMCTYKAYWKWR 15780  
Bhutan-09027 KYMY S AACTGRMTKY YGKAATSMKSRYWWSRACRRWYCY YRRYRMYRMMCTYKAYWKWR 15780  
Bhutan-09030 KYMY S AACTGRMTKY YGKAATSMKSRYWWSRACRRWYCY YRRYRMYRMMCTYKAYWKWR 15780  
Bhutan-09005 GYMY GCACTKRACTTCSKMTYCMKSACTASAWGAATWYMTTAGTRYMRAATKYKRCTYWA 15780  
Indonesia-88035 GYMY GATTTKRACTTCSKMTYCMKSACTASAWGAATWYMTTAGTRYMRAATKYKRCTYWA 15780  
Indonesia-88045 GYMY GAWWKRACTTCSKMTYCMKSACTASAWGAATWYMTTAGTRYMRAATKYKRCTYWA 15780  
Indonesia-88065 GYMY GAAA KRACTTCSKMTYCMKSACTASAWGAATWYMTTAGTRYMRAATKYKRCTYWA 15780  
\*\*\*. \* . \* : .\*\*\* \* \*\* \*\*\*\* .\*\* \*

Bhutan-09015 AWCAGKATAYTRMCTGYWAGWSYMWGMTTYTYCTMRAKTYYCTCYRMC MTRYTWWWMY 15840  
Bhutan-09024 AWCAGKATAYTRMCTGYWAGWSYMWGMTTYTYCTMRAKTYYCTCYRMC MTRYTWWWMY 15840  
Bhutan-09027 AWCAGKATAYTRCACTGYWAGWSYMWGMTTYTYCTMRAKTYYCTCYRMC MTRYTWWWMY 15840  
Bhutan-09030 AWCAGKATAYTRCACTGYWAGWSYMWGMTTYTYCTMRAKTYYCTCYRMC MTRYTWWWMY 15840  
Bhutan-09005 RWSRGT CWWCKRCA YWRCTRRTSYCTACCYTKCYARWTYWTCSKYCGAMCWGCYAACT 15840  
Indonesia-88035 RWSRRT CWWCKRCA TWRCTRG TGTMTACCYTKCYARWTYWTCSKYCGAMCWGCYAACT 15840  
Indonesia-88045 RWSRRT CWWCKRCA TWRCTAG TGTMTACCYTKCYARWTYWTCSKYCGAMCTGCYAACT 15840  
Indonesia-88065 RWSRGT CWWCKRCA YWRCTRRTSYCTACCYTKCYARWTYWTCSKYCGAMCWGCYAACT 15840  
\* . . . \* . . . \* . .

Bhutan-09015 TGRAWRWMKYRSTWRMYGMAGWRKYYRYSTRACSGCTYRWRYAGWKCMGRAYAATRAATY 15900  
 Bhutan-09024 TGRAWRWMKYRSTWRMYGMAGWRKYYRYSTRACSKYTYRWRYAGWKCMGRAYAATRAATY 15900  
 Bhutan-09027 TGRAWRWMKYRSTWRMYGMAGWRKYYRYSTRACSKYTYRWRYAGWKCMGRAYAATRAATY 15900  
 Bhutan-09030 TGRAWRWMKYRSTWRMYGMAGWRKYYRYSTRACSKYTYRWRYAGWKCMGRAYAATRAATY 15900  
 Bhutan-09005 YRARWGACKTGGYTGACRARTAAGTYRCCCARYGGTYTRWGYAGWKTC SartWRKARMWT 15900  
 Indonesia-88035 YRARWGACKTGGYTGACRARGAAGTYRCCCARYGGTYTRWGYAGWKTC SartWRKARMWT 15900  
 Indonesia-88045 YRARWGACKTGGYTGACRARGAAGTYRCCCARYGGTYTRWGYAGWKTC SartWRKAAMWT 15900  
 Indonesia-88065 YRARWGACKTGGYTGACRARTAAGTYRCCCARYGGTYTRWGYRKKWKTC SartWRKARMWT 15900

\* \* . \*\* . \*\* \* \*\* .

Bhutan-09015 YTRGCTKWWWRYRYWAAGYYRTKACSGRYWYASRYGRTGTCKCRTYSCAGYCGCWCKTR 15960  
 Bhutan-09024 YTRGCTKWTWRYRYWAAGYYRTKACSGRYWYASRYGRTGTCKCRTYSCAGYCGCWCKTR 15960  
 Bhutan-09027 YTRGCTKWWWRYRYWAAGYYRTKACSGRYWYASRYGRTGTCKCRTYSCAGYCGCWCKTR 15960  
 Bhutan-09030 YTRGCTKWWWRYRYWAAGYYRTKACSGRYWYASRYGRTGTCKCRTYSCAGYCGCWCKTR 15960  
 Bhutan-09005 CYRAYKKWWWRCAYWGRKTRWTTGAGTATWGRYKAYSCTTGKTYGKTYSTWMAGYA 15960  
 Indonesia-88035 CYRAYKTAWWRCAYWGRGTTRWTTGAGTATWGRYKAYSCTTGKTYGKTYSTAAAGTA 15960  
 Indonesia-88045 CYRAYKTAWWRCACWGRGTTRWTTGAGTATWGRYKAYSCTTGKTYGKTYSTAAAGTA 15960  
 Indonesia-88065 CYRAYKKWWWRCAYWGRKTRWTTGAGTATWGRYKAYSCTTGKTYGKTYSTWMAGYA 15960

\* . . . \*\* \* . \* . . . \*\* . . . . .

Bhutan-09015 GYGRGGAYGWRTKCYRATTTSKYCTAWRGWWRATYCRMCRGRKWCRTCRSRTARRGTW 16020  
 Bhutan-09024 GYGRGGAYGWRTKCYRATTTSKYCTAWRGWWRATYCRMCRGRKWCRTCRSRTARRGTW 16020  
 Bhutan-09027 GYGRGGAYGWRTKCYRATTTSKYCTAWRGWWRATYCRMCRGRKWCRTCRSRTARRGTW 16020  
 Bhutan-09030 GYGRGGAYGWRTKCYRATTTSKYCTAWRGWWRATYCRMCRGRKWCRTCRSRTARRGTW 16020  
 Bhutan-09005 RTKGARGCCTAKTYRWWYGYGKYCCATGRACARYYTRMWRGRKATCRCTRCAKGRRAKT 16020  
 Indonesia-88035 RTKGARGYCTAKTYRRTCGCGKYCCATGRACARYYTRMAGRRAKATYACTRCAKGRRAKT 16020  
 Indonesia-88045 RTKGARGYCTAKTYRRTCGCGKYCCATGRACARYYTRMAGRRAKATYACTRCAKGRRAKT 16020  
 Indonesia-88065 RTKGARGCCTAKTYRWWYGYGKYCCATGRACARYYTRMWRGRKATCRCTRCAKGRRAKT 16020

. . . . \*\* . \*\* \* \*\* \*\* \* . . . \*\* .

Bhutan-09015 KYMKSATSWCGYKCGRWYKCRRRYGGYTSRRCMSACGYRCKCSRTYRCYGTCAAARSYM 16080  
 Bhutan-09024 KYMKSATSWMRCGCGRWYKCRRRYGGYTSRRCMSACGYRCKCSRTYRCYGTCAARSYM 16080  
 Bhutan-09027 KYMKSATSWMRYKCGRWYKCRRRYGGYTSRRCMSACGYRCKCSRTYRCYGTCAARSYM 16080  
 Bhutan-09030 KYMKSATSWMRYKCGRWYKCRRRYGGYTSRRCMSACGYRCKCSRTYRCYGTCAARSYM 16080  
 Bhutan-09005 TTMTCRYSTMRYKSRRATYKMRRCGRRCWGATGMGTACRYTYSRYRYRCGYGAWACTA 16080  
 Indonesia-88035 TTMTCRYSTCGCGSRRATYKMRRCGRRCWGATGMGTACRYTYSRYRYRCGYGAWACTA 16080  
 Indonesia-88045 TTMTCATSTCGCGSRRATYKMRRCGRRCWGATGMGTACRYTYSRYRYRCGYGAWACTA 16080  
 Indonesia-88065 TTMTCRYSTCGCGSRRATYKMRRCGRRCWGATGMGTACRYTYSRYRYRCGYGAWACTA 16080

. \* . . \* . \* \*\* \*\* . \* . : . \* . . . .

Bhutan-09015 TWWYMKYARARYWCRKAKGGCCTCWRTRCASRWKGYKYYKYRRAYMGWRYRYKWKMGAS 16140  
 Bhutan-09024 TWWYMKYARARYWCRKAKGGCCTCWRTRCASRWKGYKYYKYRRAYMGWRYRYKWKMGAS 16140  
 Bhutan-09027 TWWYMKYARARYWCRKAKGGCCTCWRTRCASRWKGYKYYKYRRAYMGWRYRYKWKMGAS 16140  
 Bhutan-09030 TWWYMKYARARYWCRKAKGGCCTCWRTRCACGWKGYKYYKYRRAYMGWRYRYKWKMGAS 16140  
 Bhutan-09005 YTRTATYRRGATTSAGWTRRGAKTAGYRYRCGWTCGCGCTGCAARCCAAGTGCGWGMRRS 16140  
 Indonesia-88035 YTATATYGRGATTSAGWTRRGAKTAGYRYRCGWTCGCGCTGCAARCCAAGTGCGWGMRRG 16140  
 Indonesia-88045 YTATATYRRGATTSAGWTRRGAKTAGYRYRCGWTCGCGCTGCAARCCAAGTGCGWGMRRG 16140  
 Indonesia-88065 YTATATYGRGATTSAGWTRRGAKTAGYRYRCGWTCGCGCTGCAARCCAAGTGCGWGMRRS 16140

. \* \* . . . . . \* . \* . . \* \* .

Bhutan-09015 RYRCGTKCCRTYTGAGGYTMMGACGYMYAYRARRKWKWRTMYSAYSWYWMYTTWARTA 16200  
 Bhutan-09024 RYRCGTKCCRTYTGAGGYTMMGACCGYMYAYRARRKWKWRTMYSAYSWYWMYTTWARTA 16200  
 Bhutan-09027 RYRCGTKCCRTYTGAGGYTMMRACYGYMYAYRARRKWKWRTMYSAYSWYWMYTTWARTA 16200  
 Bhutan-09030 RYRCGTKCCRTYTGAGGYTMMGACYGYMYAYRARRKWKWRTMYSAYSWYWMYTTWARTA 16200

|                 |                                                               |       |
|-----------------|---------------------------------------------------------------|-------|
| Bhutan-09005    | CGYSAGSYRWYCSRKAYTCAGACCRTACRTGWAGKTGWGKCTCRYACWMCYKATWGCG    | 16200 |
| Indonesia-88035 | CGYSAGSYRWYCSRKAYKAGWCCGTACRTGWAGKTGWGKCTCRYACWMCYKATWGCG     | 16200 |
| Indonesia-88045 | CGYSAGSYRWYCSRKAYKAGWCCGTACRTGWAGKTGWGKCTCRYACWMCYKATWGCG     | 16200 |
| Indonesia-88065 | CGYSAGSYRWYCSRKAYTCAGACCRTACRTGWAGKTGWGKCTCRYACWMCYKATWGCG    | 16200 |
|                 | .: . * * . .* . * * . . ** ** * .:                            |       |
| Bhutan-09015    | TGGTTYGKTRMWRARYARKRKTWTGYCCKGARTRYTAWRYARRAYRCMACTAAAYRRYK   | 16260 |
| Bhutan-09024    | TGGTTYGKTRMWRARYARKRKTWTGYCCKGARTRYTAWRYARRAYRCMACTAAAYRRYK   | 16260 |
| Bhutan-09027    | TGGTTYGKTRMWRARYARYTGGTWTGYCCKGARTRYTAWRYARRAYRCMACTAAAYRRYK  | 16260 |
| Bhutan-09030    | TGGTTYGKTRMWRARYARYTRKTWTGYCCKGARTRYTAWRYARRAYRCMACTAAAYRATK  | 16260 |
| Bhutan-09005    | GRSCCTAYGTARCTRYWRYTGGAWKRTYYGRWRYRCWMARYGGRRYGCCRMCTMRCGRYK  | 16260 |
| Indonesia-88035 | GGGCCTATGWAAMTRYWRYTGGAWKRTYYGRWRYRCWMARYGGRRYGCCRMCTMRCGRYG  | 16260 |
| Indonesia-88045 | GRSCCTATGWAAMTRYWRYTGGAWKRTYYGRWRYRCWMARYGGRRYGCCRMCTMRCGRYG  | 16260 |
| Indonesia-88065 | GRSCCTAYGTARCTRYWRYTGGAWKRTYYGRWRYRCWMARYGGRRYGMRMCTMRCGRYK   | 16260 |
|                 | . . : ** ** . : * . * * ** . * * :                            |       |
| Bhutan-09015    | YCYTYWKKSYRYATRYGATCRCRSTRRSCWRGKWKRYKRATWMMMRCSYRТАARMWVKGC  | 16320 |
| Bhutan-09024    | YCYTYWKKSYRYATRYGATCRCRSTRRSCWRGKWKRYKRATWMMMRCSYRТАARMWVKGC  | 16320 |
| Bhutan-09027    | YCYTYWKKSYRYATRYGATCRCRSTRRSCWRGKWKRYKRATWMMMRCSYRТАARMWVKGC  | 16320 |
| Bhutan-09030    | YCYTYWKKSYRYATRYGATCRCRSTRRSCWRGKWKRYKRATWMMMRCSYRТАARMWVKGC  | 16320 |
| Bhutan-09005    | TYTYAKKCTGCCYAYRRTYAMRSYRRSYWASKTRTGRAYAMAMRYSYRWMMRWMTTRM    | 16320 |
| Indonesia-88035 | TCTYYAGGCTGCCYAYRRTYAMRSYRRSYWASKTRTGRYAMAMRYSYRWMMRWMTTRM    | 16320 |
| Indonesia-88045 | TCTYYAGGCTGCCYAYRRTYAMRSYRRSYWASKTRTGRYAMACRYSYRWMMRWMTTRM    | 16320 |
| Indonesia-88065 | TYTYAKKCTGCCYAYRRTYAMRSYRRSYWASKTRTGRAYAMACRYSYRWMMRWMTTRM    | 16320 |
|                 | * . : * ** ** * . * * * * * ** ** .                           |       |
| Bhutan-09015    | AGSRMRCCATAKTTGCRTTWMKCATACWATAKSKACKCTGYMRSYGTAWSYMSTMYKSW   | 16380 |
| Bhutan-09024    | AGSRMRCCATAKTTGCRTTWMKCATACWATAKSKACKCTGYMRSYGTAWSYMSTMYKSW   | 16380 |
| Bhutan-09027    | AGSRMRCCATAKTTGCRTTWMKCATACWATAKSKACKCTGYMRSYGTAWSYMSTMYKSW   | 16380 |
| Bhutan-09030    | AGSRMRCCATAKTTGCRTTWMKCATACWATAKSKACKCTGYMRSYGTAWSYMSTMYKSW   | 16380 |
| Bhutan-09005    | AAGGCRTYRKWKYKYRATTCGATWMYATMKGKGTGTGACRTAAGYRARACCMCYATKGW   | 16380 |
| Indonesia-88035 | TGGGCRTYRKWKYKYRATTCGATWMYATMKGKGTGTGACRTAAGYRARACCMCYATKGW   | 16380 |
| Indonesia-88045 | TGGGCRTYRKWKYKYRATTCGATWMYATMKGKGTGTGACRTAAGYRARACCMCYATKGW   | 16380 |
| Indonesia-88065 | AAGGCRTYRKWKYKYRATTCGATWMYATMKGKGTGTGACRTAAGYRARACCMCYATKGW   | 16380 |
|                 | :.. * . . . * : . : ..*.. . . * : . * . **                    |       |
| Bhutan-09015    | YKCMYRYAGSKRMGCAYCWATGWYGCCRAWGYTRKRRSRYRGRAYGGYGCATRCRRYGY   | 16440 |
| Bhutan-09024    | YKCMYRYAGSKRMGCAYCWATGWYGCCRAWGYTRKRRSRYRGRAYGGYGCATRCRRYGY   | 16440 |
| Bhutan-09027    | YKCMYRYAGSKRMGCAYCWATGWYGCCRAWGYTRGARSRYRGRAYGGYGCATRCRRYGY   | 16440 |
| Bhutan-09030    | YKCMYRYAGSKRMGCAYCWATGWYGCCRAWGYTRKRRSRYRGRAYGGYGCATRCRRYGY   | 16440 |
| Bhutan-09005    | YTYTCTRTRKCKGCATMICYWRKSWYCTYRTAACARGRCRTRRGGTTRRCKGTGWYGGYRY | 16440 |
| Indonesia-88035 | YTTTCTRTRKCKGCATMICYWRKSWYCTYRTAACARGRCRTRRGGTTRRCKGTGWYGGYRY | 16440 |
| Indonesia-88045 | YTYTCTATRCKGCATMICYWRKSWYCTYRTAACARGRCRTRRGGTGGCKGTGWYGGYRY   | 16440 |
| Indonesia-88065 | YTYTCTATRCKGCATMICYWRKSWYCTYRTAACARGRCRTRRGGTTRRCKGTGWYGGYRY  | 16440 |
|                 | * . . * . * ..** * : . * . * * .                              |       |
| Bhutan-09015    | RCCKYRWARTTMSMSKYWCWYRYYYKRMRTRCYKYAKYTCATTTYTKMYCKRAYRWT     | 16500 |
| Bhutan-09024    | RCCKYRWARTTMSMSKYWCWYRYYYKRMRTRCYKYAKYTCATTTYTKMYCKRAYRWT     | 16500 |
| Bhutan-09027    | ACCKYRWARTTMSMSKYWCWYRYYYKRMRTRCYKYAKYTCATTTYTKMYCKRAYRWT     | 16500 |
| Bhutan-09030    | RCCKYRWARTTMSMSKYWCWYRYYYKRMRTRCYKYAKYTCATTTYTKMYCKRAYRWT     | 16500 |
| Bhutan-09005    | GTGGYAWRGGWGCCTYWSATAYYTGRRCRMYGMYKCRKCYMWTYWCYTYWTCGACCRWY   | 16500 |
| Indonesia-88035 | GTGGYAWRGGWGCCTYWSATAYYTGRRCRMYGMYKCRKCYMWTYWCYTYWTCGACCRWY   | 16500 |
| Indonesia-88045 | GTGGYAWRGGWGCCTYWSATAYYTGRRCRMYGMYKCRKCYMWTYWCYTYWYKACCRWY    | 16500 |
| Indonesia-88065 | GTGGYAWRGGWGCCTYWSATAYYTGRRCRMYGMYKCRKCYMWTYWCYTYWTCGACCRWY   | 16500 |



\* \* \* . . . \* \* \* \* \* \* \* \* \* . . . \* \* \*

Bhutan-09015 MCRARYRRCRTRWRCCCCCGTCRTMWKTGCTTRARTCARWYAYYYRTGWWGYRWRGAAAY 16560

Bhutan-09024 MCRARYRRCRTRWRCCCCCGTCRTMWKTGCTTRARTCARWYAYYYRTGWWGYRWRGAAAY 16560

Bhutan-09027 MCRARYRRCRTRWRCCCCCGTCRTMWKTGCTTRARTCARWYAYYYRTGWWGYRWRGAAAY 16560

Bhutan-09030 MCRARYRRCRTRWRCCCCCGTCRTMWKTGCTTRARTCARWYAYYYRTGWWGYRWRGAAAY 16560

Bhutan-09005 CYRGATGGTWRWRYYYTYRYTGYCWCAMKYGRGYMRGWTMCTCGKRWWRCGARRRGCC 16560

Indonesia-88035 CYRGATGGTWRWRYYYTYRYTGYCWCAMGTGRGYMRGWTMCTCGKRWWRCGARRRGCC 16560

Indonesia-88045 CYRGATGGTWRWRYYYTYRYTGYCWCAMGYGRGYMRGWTMCTCGKRWWRCGARRRGCC 16560

Indonesia-88065 CYRGATGGTWRWRYYYTYRYTGYCWCAMGYGRGYMRGWTMCTCGKRWWRCGARRRGCC 16560

\* . \* \* \* \* \* . \* \* \* \* .

Bhutan-09015 YAYAYYAKMYTYWYKSTYATATTRKRWYKGYTWYRWTGRSKGYMYWCRSRSACARRAA 16620

Bhutan-09024 YAYAYYAKMYTYWYKSTYATATTRGAGTKGYTWYRWTGRSKGYMYWCRSRSACARRAA 16620

Bhutan-09027 YAYAYYAKMYTYWYKSTYATATTRGAGTKGYTWYRWTGRSKGYMYWCRSRSACARRAA 16620

Bhutan-09030 YAYAYYAKMYTYWYKSTYATATTRKRWYKGYTWYRWTGRSKGYMYWCRSRSACARRAA 16620

Bhutan-09005 YTYMTRKAYGYTCGSYATCMYGTACKRYKAYAAAYRGCGRTYATTYGCACRYGGAWM 16620

Indonesia-88035 YTYMTRKAYGYTCGSYATCMYGTACKRYKAYAAAYRGCGRTYATTYGCACRYGGAWM 16620

Indonesia-88045 YTYMTRKAYGYTCGSYTRWYAYYGTACKRYKAYAAAYRGCGRTYATTYGCACRYGGAWM 16620

Indonesia-88065 YTYMTRKAYGYTCGSYATCMYGTACKRYKAYAAAYRGCGRTYATTYGCACRYGGAWM 16620

\* : \* \* \* \* \* \* \* \* \* . \* . . .

Bhutan-09015 WTTGWKKTWGGTYWGKTTYRTWGGCYTYKYCATKRRKRKWKWAGYTTTRAASKSYAYCTG 16680

Bhutan-09024 WTTGWKKTWGGTYWGKTTYRTWGGCYTYKYCATKRRKRKWKWAGYTTTRAATGYAYCTG 16680

Bhutan-09027 WTTGWKKTWGGTYWGKTTYRTWGGCYTYKYCATKRRKRKWKWAGYTTTRAASKSYAYCTG 16680

Bhutan-09030 WTTGWKKTWGGTYWGKTTYRTWGGCYTYKYCATKRRKRKWKWAGYTTTRAASKSYAYCTG 16680

Bhutan-09005 AYYTTWWTCAARRKCKWGYCGYTCYCYWYGYSGYAGKRSTTRKYCTTRGRKSYGYK 16680

Indonesia-88035 AYYTTWWTCAARRKCKWGYCGYTCYCYWYGYSGYAGKRSTTRKYCTTRGRKSYGYK 16680

Indonesia-88045 AYYTTWWTCAARRKCKWGYCGYTCYCYWYGYSGYAGKRSTTRKYCTTRGRKSYGYK 16680

Indonesia-88065 AYYTTWWTCAARRKCKWGYCGYTCYCYWYGYSGYAGKRSTTRKYCTTRGRKSYGYK 16680

\* \* . . \* \* \* \* \* \* \* \* \* . . .

Bhutan-09015 SCCCWCGTWRRTYACSRAGARWKRKATSRAAAYKCTYYTYYCYAYRCKRYCRYGASS 16740

Bhutan-09024 SCCCWCGTWRRTYACSRAGARWKRKATGGAAAYKCTYYTYYCYAYRCKRYCRYGASS 16740

Bhutan-09027 SCCCWCGTWRRTYACSRAGARWKRKATGGAAAYKCTYYTYYCYAYRCKRYCRYGASS 16740

Bhutan-09030 SCCCWCGTWRRTYACSRAGARWKRKATSRAAAYKCTYYTYYCYAYRCKRYCRYGASS 16740

Bhutan-09005 SYYYARSRWAWAYCGYGRWTRWGARTRYGGAGYTSACTTYCYTYGCGGGTWCMACSRGS 16740

Indonesia-88035 SYYYARSRWAWAYCGYGRWTRWGARTRYGGAGYTSACTTYCYTYGCGGGTWCMACSRGS 16740

Indonesia-88045 SYYYARSRWAWAYCGYGRWTRWGARTRYSRAGYTSACTTKCYTYGCGGGTWCMACSRGS 16740

Indonesia-88065 SYYYARSRWAWAYCGYGRWTRWGARTRYSRWGYTSACTTKCYTYGCGGGTWCMACSRGS 16740

\* . . . \* : \* \* \* . . . \* . . . \* . . . \*

Bhutan-09015 ATTKGCYYAWYWMMKYYMRCCMYSYRRTYRMAWMTYKAGRGCRMTATYAYTRSTCR 16800

Bhutan-09024 ATTKGCYYAWYWMMKYYMRCCMYSYRRTYRMAWMTYKAGRGCRMTATYAYTRSTCR 16800

Bhutan-09027 ATTKGCYYAWYWMMKYYMRCCMYSYRRTYRMAWMTYKAGRGCRMTATYAYTRSTCR 16800

Bhutan-09030 ATTKGCYYAWYWMMKYYMRCCMYSYRRTYRMAWMTYKAGRGCRMTATYAYTRSTCR 16800

Bhutan-09005 WYWKRYCCRWYAMAAGCYCAGMYMTGYRRTACACCAMYGRRRKCATCGYMGYRCYACWYA 16800

Indonesia-88035 WYWKRYCCRWYAMAAGCYCAGMYMTGYRRTACACCACCGRRAKCATCGYMGYRCYACWYA 16800

Indonesia-88045 WYWKRYCCRWYAMAAGCYCAGMYMTGYRRTACACCACCGRRAKCATCGYMGYRCYACWYA 16800

Indonesia-88065 WYWKRYCCRWYAMAAGCYCAGMYMTGYRRTACACCAMYGRRRKYATCGYMGYRCYACWYA 16800

\* \* \* \* \* \* \* \* \* . . . \* .

Bhutan-09015 CYRYMMYGCTYYCRTAWGGCTTYRCKTAKRYMRWCYCCCKGCGTWMSTWAMAYAGWG 16860

Bhutan-09024 CYRYMMYGCTYYCRTAWRGCTTYRCKTAKRYMRWCYCCCKGCGTWMSTWAMAYAGWG 16860

Bhutan-09027 CYRYMMYGCTYYCRTAWRGCTTYRCTKRAKYRMRWCYCCCKGCGTWMSTTWAMAYAGWG 16860

Bhutan-09030 CYRYMMYGCTYYCRTAWRGCTTYRCTKRAKYRMRWCYCCCKGCGTWMSTTWAMAYAKWG 16860

Bhutan-09005 MCGYCACATYYCTRKRWRAMYYAMWTRGGCAMRTMCCYYYGAYRYWMSKYARMRYGGWA 16860

Indonesia-88035 MCGYCACATCTCTRKRWRAMYYAMWTRGGCAMRTMCCYYYGAYRYWMSKYARMRYGGWA 16860

Indonesia-88045 MCGYCACATCTCTRKRWRAMYYAMWTRGGCAMRTACCYYYGAYRYWMSKYARMRYGGWA 16860

Indonesia-88065 MCGYCACATCTCTRKRWRAMYYAMWTRGGCAMRTMCCYYYGAYRYWMSKYARMRYGGWA 16860

\* . \* . \* . \* . \* . \* . \* . \* . \* . \* . \* .

Bhutan-09015 TYARSMRMWATTCGACTTAGTGARCAARRRYWKTYRSMWKS GACTATYSMWYRTRYWMA 16920

Bhutan-09024 TYARSMRMWATTCGACTTAGTGARCAARRRTWKTYRSMWKS GACTATYSMWYRTRYWMA 16920

Bhutan-09027 TYARSMRMWATTCGACTTAGTGARCAARRRYWKTYRSMWKS GACTATYSMWYRTRYWMA 16920

Bhutan-09030 TYARSMRMWATTCGACTTAGTGARCAARRRYWKTYRSMWKS GACTATYSMWYRTRYWMA 16920

Bhutan-09005 TTMRCSMWTKKYRYYYWKYRRRGTWRASGYTKYYSMWKCRMYRYRCGMWYGWRTWMT 16920

Indonesia-88035 TTMRCSMWTKKYRYYYWKYRRRGTWRASGYTKYYSMWKCRMYRYRCGMWYGWRTWMT 16920

Indonesia-88045 KTMRCSMWTKKYRYYYWKYRRRGTWRASGYTKYYSMWKCRMYRYRCGMWYGWRTWMT 16920

Indonesia-88065 TTMRCSMWTKKYRYYYWKYRRRGTWRASGYTKYYSMWKCRMYRYRCGMWYGWRTWMT 16920

. \* . \* \* : . . \* \* \* \* \* . \* \* \* \* \* . \* \* \* :

Bhutan-09015 RYKWKYWRAYCGGCYCTTRRRKACGRYACWGAMRAAYTGCTRYSY SMMKKT YAWGYAGK 16980

Bhutan-09024 RYKWKYWRAYCGGCYCTTRRRKACGRYACWGAMRAAYTGCTRYSY SMMKKT YAWGYAGK 16980

Bhutan-09027 RYKWKYWRAYCGGCYCTTRRRKACGRYACWGAMRAAYTGCTRYSY SMMKKT YAWGYAGG 16980

Bhutan-09030 RYKWKYWRAYCGGCYCTTRRRKACGRYACWGAMRAAYTGCTRYSY SMMKKT YAWGYAGG 16980

Bhutan-09005 ACTTGCYWGMTYRMTYYYAARTMYRRYRYWSRARTCYWKMCRYGTCCMGTKTWARCAGG 16980

Indonesia-88035 ACTTGCYWGMTCAAMTYYYYAARTMYRRYRYWSRARTCYWKMCRYGTCCMGTKTWARCARG 16980

Indonesia-88045 ACTTGCYWGMTCAAMTYYYYAARTMYRRYRYWSRARTCYWKMCRYGTCCMGTKTWARCARG 16980

Indonesia-88065 ACTTGCYWGMTYRMTYYYAARTMYRRYRYWSRARTCYWKMCRYGTCCMGTKTWARCARG 16980

. \* \* \* \* \* \* . \* \* \* \* . \* : \* \* \* . \* \* . .

Bhutan-09015 GWGGWYYSYWCYCRYARGYRRYRYKCGGSRWWRACYGTRYRYRA WWSGRCYWCYCY 17040

Bhutan-09024 GWGGWYYSYWCYCRYARGYRRYRYKCGGSRWWRACYGTRYRYRA WWSGRCYWCYCY 17040

Bhutan-09027 GWGGWYYSYWCYCRYARGYRRYRYKCGGSRWWRACYGTRYRYRA WWSGRCYWCYCY 17040

Bhutan-09030 GWGGWYYSYWCYCRYARGYRRYRYKCGGSRWWRACYGTRYRYRA WWSRRCYWCYCY 17040

Bhutan-09005 RWARWYCTCCWYYS TSGTWGCYTCGRGYKYRKRWARRYCRYGYRTATWWSRGYYAGYYC 17040

Indonesia-88035 RTARWYCTCCWYYS TSGTWGCYTCGRGYKYRKRWARRYCRYGYRTATWWSRGYYAGYYC 17040

Indonesia-88045 RTARWYCTCCWYYS TSGTWGCYTCGRGYKYRKRWARRYCRYGYRTATWWSRGYYAGYYC 17040

Indonesia-88065 RWARWYCTCCWYYS TSGTWGCYTCGRGYKYRKRWARRYCRYGYRTATWWSRGYYAGYYC 17040

. \* \* . \* . \* \* \* \* . \* \* \* \* \* \* \* : \* \* \* \* \* \* \*

Bhutan-09015 CAYACGAMGTTGYACWWRCAKYRRCYTYRTRKRGGWYRRGSCCMYSY TCATWWAYT 17100

Bhutan-09024 CAYACGAMGTTGYACWWRCAKYRRCYTYRTRKRGGWYRRGSCCMYSY TCATWWAYT 17100

Bhutan-09027 CAYACGAMGTTGYACWWRCAKYRRCYTYGTRKRGGWYRRGSCCMYSY TCATWWAYT 17100

Bhutan-09030 CAYACGAMGTTGYACWWRCAKYRRCYTYRTRKRGGWYRRGSCCMYSY TCATWWAYT 17100

Bhutan-09005 YRCGSWMMRCYRCMSTTRYRCGTRRRYYYTAYATGRARKTTGGASTYAYCCYYACATCCW 17100

Indonesia-88035 YRCRSWMMRCYRCMSTTRKRCGTRRRYYYTAYATGRARKTTGGASTYAYCCYYACATCCW 17100

Indonesia-88045 YRCRSWMMRCTGCMSTTRKRCGTRRRYYYTAYATGRARKTTGGASTYAYCCYYACATCCW 17100

Indonesia-88065 YRCGSWMMRCYRCMSTTRYRCGTRRRYYYTAYATGRARKTTGGASTYAYCCYYACATCCW 17100

. \* . \* \* \* \* . \* \* \* .

Bhutan-09015 ARWSRKRRTATYCYTYMYMAKRYTYCCTYAGTWAGGRRTTGRYCYRCCCTTRYGMRTY 17160

Bhutan-09024 ARWSRKRRTATYCYTYMYMAKRYTYCCTYAGTWAGGRRTTGRYCYRCCCTTRYGMRTY 17160

Bhutan-09027 ARWSRKRRTATYCYTYMYMAKRYTYCCTYAGTWAGGRRTTGRYCYRCCCTTRYGMRTY 17160

Bhutan-09030 ARWSRKRRTATYCYTYMYMAKRYTYCCTYAGTWAGGRRTTGRYCYRCCCTTRYGMRTY 17160

Bhutan-09005 RGWSATAGACTACYMCCRTGYKYMKCRSKATAARRCYRGYTCRYTYMYWRYRMRYT 17160

Indonesia-88035 RGWSATARRCTACYMCCRTGYTCMKCRSKATAARRCYRGYTCRYTYMYWRYRMRYT 17160

|                 |                                                                |       |
|-----------------|----------------------------------------------------------------|-------|
| Indonesia-88045 | RGWSATARRCTACYYMCCORTGYYYKMKCRSKATAARACYRGTTCRYYYTMYWRYRMRYT   | 17160 |
| Indonesia-88065 | RGWSATARRCTACYYMCCORTGYYYKMKCRSKATAARRCYRGTTCRYYYTMYWRYRMRYT   | 17160 |
|                 | * * . . * * . ** . . . . * * * * ** **                         |       |
| Bhutan-09015    | YCWCTGRACGRAACSKGKWRKRCRYWRYYSMWGMGYCSYRCRTRSCWASACGTGCRRRYG   | 17220 |
| Bhutan-09024    | YCWCTGRACGRRACSKGKWRKRCRYWRYYSMWGAGYCSYRCRTRSCWASACGTGCRRRYG   | 17220 |
| Bhutan-09027    | YCWCTGRACGRRACSKGKWRKRCRYWRYYSMWGAGYCSYRCRTGCCWASACGTGCRRRYG   | 17220 |
| Bhutan-09030    | YCWCTGRACGRRACSKGKWRKRCRYWRYYSMWGAGYCSYRCRTRSCWASACGTGCRRRYG   | 17220 |
| Bhutan-09005    | TTWYGRGRSRRRRYCKRKWRKGYRYWACTSAYAMGTMCYATRYGCCTAGRTRYRYGRGCR   | 17220 |
| Indonesia-88035 | TTWYGRGRSRRRRYCKRKWRKGYRYWACTSAYAAGTMCYATRYGCSWRGRTRYRYGRGCR   | 17220 |
| Indonesia-88045 | TTWYGRGRSRRRRYCKRKWRKGYRYWACTSAYAARTMCYATRYGCSWRGRTRYRYGRGCR   | 17220 |
| Indonesia-88065 | TTWYGRGRSRRRRYCKRKWRKGYRYWACTSAYAMGTMCYATRYGCSWRGRTRYRYGRGCR   | 17220 |
|                 | * . * . * **** * * : . * * . . *                               |       |
| Bhutan-09015    | RRYARMCGACSRRCGMRMRYARKGTSTGTGGAAYMMRCGTTGTATCCMRGTGRTGRTGRY   | 17280 |
| Bhutan-09024    | RRYARMCGACSRRCGMRMRYAGKGTSTGTGGAAYMMRCGTTGTATCCMRGTGRTGRTGRY   | 17280 |
| Bhutan-09027    | RRYARMCGACSRRCGMRMRYAGKGTSTGTGGAAYMMRCGTTGTATCCMRGTGRTGRTGRY   | 17280 |
| Bhutan-09030    | RRYARMCGACSRRCGMRMAAYAGKGTSTGTGGAAYMMRCGTTGTATCCMRGTGRTGRTGRY  | 17280 |
| Bhutan-09005    | RGCRMYRRTSARSRAGCGGCTGKRYGKRYSRAYMMRTKGYRYRYCTCRKRKRAKKGKGT    | 17280 |
| Indonesia-88035 | RGCRMYRRTSARSRAGCGGCTGKRYGKACGRRGYMMRTKGYRYRYCYCRKRKRAKKGKGT   | 17280 |
| Indonesia-88045 | RGCRMYRRTSARSRAGCGGCTGKRYGKACGRRGYMMRTKGYRYRYCYCRKRKRAKKGKGT   | 17280 |
| Indonesia-88065 | RGCRMYRRTSARSRAGCGGCTGKRYGKRYSRAYMMRTKGYRYRYCYCRKRKRAKKGKGT    | 17280 |
|                 | * ** * * . : * .. .**** * * .                                  |       |
| Bhutan-09015    | GTWSRCRYAAYAKCYTGGYYGRMAGTSCYRYARAGRKATGGRTAWRRCTMACRWRAAYGA   | 17340 |
| Bhutan-09024    | GTWSRCRYAAYAKCYTGGYYGRMAGTSCYRYARAGRKATGGRTAWRRCTMACRWRAAYGA   | 17340 |
| Bhutan-09027    | GTWSRCRYAAYAKCYTGGYYGRMAGTSCYRYARAGRKATGGRTAWRRCTMACRWRAAYGA   | 17340 |
| Bhutan-09030    | GTWSRCRYAAYAKCYTGGYYGRMAGTSCYRYARAGRKATGGRTAWRRCTMAYRWRAAYGA   | 17340 |
| Bhutan-09005    | GTACRAAYRRCWTACWRKTYSRMRSKSYTACRGWKRKMCRRAYRAARMKRCRWRWMTRR    | 17340 |
| Indonesia-88035 | RYACRAAYRRCWTACWRKTYSRMRSKSYTACRGWKRKMCRRAYRAARMKRCRWRWMTRR    | 17340 |
| Indonesia-88045 | RYACRAAYRRCWTACWATTYSRMRSKSYTACRGWKRKMCRRAYRAARMKRCRWRWMTRR    | 17340 |
| Indonesia-88065 | GTACRAAYRRCWTACWRKTYSRMRSKSYTACRGWKRKMCRRAYRAARMKRCRWRWMTRR    | 17340 |
|                 | . * . * .. * . ** .. * * * * ** * . ***                        |       |
| Bhutan-09015    | YMCRCYCYGKYTAYMCKYTYRYCRGCCMRWSCYRRGWTGRYTMMMRGWTWTGRCCRR      | 17400 |
| Bhutan-09024    | YMCRCYCYGKYTAYMCKYTYRYCRGCCMRWSCYRRGWTGRYTMMMRGWTWTGRCCRR      | 17400 |
| Bhutan-09027    | YMCRCYCYGKYTAYMCKYTYRYCRGCCMRWSCYRRGWTGRYTMACRGWTWTGRCCRR      | 17400 |
| Bhutan-09030    | YMCRCYCYGKYTAYMCKYTYRYCRGCCMRWSCYRRGWTGRYTMMMRGWTWTGRCCRR      | 17400 |
| Bhutan-09005    | YCARYKTYRKYRTRCATGYCGYRSMRAGTSYTAGSWWRATWCCAGRAWAWKGGYSAA      | 17400 |
| Indonesia-88035 | YCARYKTYRKYRTRCATGYCGYRSMRAGTSYTAGSATRATWCCAGRAWAWKGGYSAA      | 17400 |
| Indonesia-88045 | YCARYKTYRKYRTRCATGYCGYRSMRAGTSYTAGSATRATWCCAGRAWAWKGGYSAA      | 17400 |
| Indonesia-88065 | YCARYKTYRKYRTRCATGYCGYRSMRAGTSYTAGSWWRATWCCAGRAWAWKGGYSAA      | 17400 |
|                 | * . * * * * * . * .. * . : * : .                               |       |
| Bhutan-09015    | YYRTRYRRRCYWRTYRRTGTGYAYCYTRCRAKCRTAATYRAYYRGMYYRRRCARWTTAYT   | 17460 |
| Bhutan-09024    | YYRTRYRRRCYWRTYRRTGTGWKYAYCYTRCRAKCRTAATYRAYYRGMYYRRRCARWTTAYT | 17460 |
| Bhutan-09027    | YYRTRYRRRCYWRTYRRTGTGYAYCYTRCRAKCRTAATYRAYYRGMYYRRRCARWTTAYT   | 17460 |
| Bhutan-09030    | YYRTRYRRRCYWRTYRRTGTGYAYCYTRCRAKCRTAATYRAYYRGMYYRRRCARWTTAYT   | 17460 |
| Bhutan-09005    | CYAWCSRGTTRWTCRYCWTGKCRYYYWRTRSWKYGYYRWRGTYASMRKRYGGTYRRCG     | 17460 |
| Indonesia-88035 | CYAWCSRGTTRWTCRYCTGTATTTARTRCWKYGYYRWRGTYASMRKRYAGTYRRCG       | 17460 |
| Indonesia-88045 | CYAWCSRGTTRWTCRYCTRTYAYYYWRTRCWKYGYYRWRGTYASMRKRYAGTYRRCG      | 17460 |
| Indonesia-88065 | CYAWCSRGTTRWTCRYCTGTCRYYYWRTRSWKYGYYRWRGTYASMRKRYGGTYRRCG      | 17460 |
|                 | * * ** * . * * . * * * * . * * * *                             |       |



|                 |                                                              |       |
|-----------------|--------------------------------------------------------------|-------|
| Bhutan-09005    | MKWMYYMYACTAGTAKAAWMCTAYTGGASYTGYAMYRCCCRATRGTWKRTAGCKCRRYT  | 17820 |
| Indonesia-88035 | MKWMYYMYACTAGTAKAAWMCTAYKGGACCTTYAMYRCCCRATRGTWKRTAGCKCRRYT  | 17820 |
| Indonesia-88045 | MKWMYYMYACTAGTWKAAWMCTAYKGGACCTTYAMYRCCCRATRGTWKRTAGCKCRRYT  | 17820 |
| Indonesia-88065 | MKWMYYMYACTAGTWKAAWMCTAYTGGASYTGYAMYRCCCRATRGTWKRTAGCKCRRYT  | 17820 |
|                 | . . . * . . . * . . .                                        |       |
| Bhutan-09015    | TRMCATRGAKAYRTYKTTYMCTMCTATYCMARAYKACYCRKRRTCYCTTGTTAKMYWY   | 17880 |
| Bhutan-09024    | TRMCATRGAKAYRTYKTTYMCTMCTATYCMARAYKACCYCRKRRTCYCTTGTTAKMYWY  | 17880 |
| Bhutan-09027    | TRMCATRGAKAYRTYKTTYMCTMCTATYCAARAYKACYCRKRRTCYCTTGTTAKMYWY   | 17880 |
| Bhutan-09030    | TRMCATRGAKAYRTYKTTYMCTMCTATYCAARAYKACYCRKRRTCYCTTGTTAKMYWY   | 17880 |
| Bhutan-09005    | WAAYRTRKRGRYRYTKKYAYWMTWTTYCRGRCGCYCTYGTGCSYTGTYWGMGCCAC     | 17880 |
| Indonesia-88035 | WAAYRWGKRGRYRYTKKYAYWMTAWKYYCRGRCGCYCTYGTGCSYTGTYWGMGCCAC    | 17880 |
| Indonesia-88045 | WAAYRWGKRGRYRYTKKYAYWMTWTTYCRGRCGCYCTYGTGCSYTGTYWGMGCCAC     | 17880 |
| Indonesia-88065 | WAAYRTRKRGRYRYTKKYAYWMTWTTYCRGRCGCYCTYGTGCSYTGTYWGMGCCAC     | 17880 |
|                 | ** . . * * . * . . * . *                                     |       |
| Bhutan-09015    | GGCRRRWRMYTARWWRKCKMCGACACRCGSKCARCRGSMKGCRRRRGGACGKATCGTC   | 17940 |
| Bhutan-09024    | GGCRRRWRMYTARWWRKCKMCGACACRCGSKCARCRGSMKGCRRRRGGACGKATCGTC   | 17940 |
| Bhutan-09027    | GGCRRRWRMYTARWWRKCKMCGACACRCGSKCARCRGSMKGCRRRRGGACGKATCGTC   | 17940 |
| Bhutan-09030    | GGCRRRWRMYTARWWRKCKMCGACACRCGSKCARCRGSMKGCRRRRGGACGKATCGTC   | 17940 |
| Bhutan-09005    | KRSAAGTAMCCKRRWAGGYKMYARTMCRYRSYTSAGARRSAGSSGGGARRRYRKWKTA   | 17940 |
| Indonesia-88035 | KRSAAGTAMCCKRRWAGGYKMYARTMCRYRSYTSAGARRSAGSSGGGARRRYRKWKTA   | 17940 |
| Indonesia-88045 | KRSAAGTAMCCKRRWAGGYKMYARTMCRYRSYTSAGARRSAGSSGGGARRRYRKWKTA   | 17940 |
| Indonesia-88065 | KRSAAGTAMCCKRRWAGGYKMYARTMCRYRSYTSAGARRSAGSSGGGARRRYRKWKTA   | 17940 |
|                 | . * . ** ** : * * . . . * * . . * . .                        |       |
| Bhutan-09015    | CARRRAAAKYCRKTTTRGRSYYTAYYYRARWYMRMTASACAARAGMGYGGYKCA       | 18000 |
| Bhutan-09024    | CARRRAAAKYCRKTTTRGRSYYTAYYYRARWYMRMTASACAARAGMGYGGYKCA       | 18000 |
| Bhutan-09027    | CARRRAAAKYCRKTTTRGRSYYTAYYYRARWYMRMTASACAARAGMGYGGYKCA       | 18000 |
| Bhutan-09030    | CARRRAAAKYCRKTTTRGRSYYTAYYYRARWYMRMTASACAARAGMGYGGYKCA       | 18000 |
| Bhutan-09005    | YGARRRRKCYATYRRRGYCYTRWAWYMRAMAMGWSRRARSCTYTRSTTSWTAW        | 18000 |
| Indonesia-88035 | YGARRRRKCYATYRRRGYCYTRWAWYMRAMAMGWSRRARSCTYTRSTTSWTAW        | 18000 |
| Indonesia-88045 | YGARRRRKCYATYRRRGYCYTRWAWYMRAMAMGWSRRARSCTYTRSTTSWTAW        | 18000 |
| Indonesia-88065 | YGARRRRKCYATYRRRGYCYTRWAWYMRAMAMGWSRRARSCTYTRSTTSWTAW        | 18000 |
|                 | . ** . * . ** .** : * * ***** : . . . * . . .                |       |
| Bhutan-09015    | AYYRGWMSAYYAGTYCWMCGWGWRYRYAGCGCARCRMTTYTWWTAYTATMSRAGRAYT   | 18060 |
| Bhutan-09024    | AYYRGWMSAYYAGTYCWMCGWGWRYRYAGCGCARCRMTTYTWWTAYTATMSRAGRAYT   | 18060 |
| Bhutan-09027    | AYYRGWMSAYYAGTYCWMCGWGWRYRYAGCGCARCRMTTYTWWTAYTATMSRAGRAYT   | 18060 |
| Bhutan-09030    | AYYRGWMSAYYAGTYCWMCGWGWRYRYAGCGCARCRMTTYTWWTAYTATMSRAGRAYT   | 18060 |
| Bhutan-09005    | RYYASACARMTTWRKTYWAYRTRTRYGCMKYAMTGGACYGYAATYWCYCRYCCARARRYT | 18060 |
| Indonesia-88035 | RYYASACAGMTTWRKTYWAYRTRTRYGCMKYAMTGGACYGYAATYWCYCRYCCARARRYT | 18060 |
| Indonesia-88045 | RYYASACAGMTTWRKTYWAYRTRTRYGCMKYAMTGGACYGYAATYWCYCRYCCARARRYT | 18060 |
| Indonesia-88065 | RYYASACAGMTTWRKTYWAYRTRTRYGCMKYAMTGGACYGYAATYWCYCRYCCARARRYT | 18060 |
|                 | ** . . . * ** . : * : * . . . * *                            |       |
| Bhutan-09015    | YTKSRSAYYTTKWYARCTYRCCGGRRGRRCYRTRCRRKYRRGAYRMKMYWGRTRGGMRCR | 18120 |
| Bhutan-09024    | CTKSRSAYYTTKWYARCTYRCCGGAAGRRCYRTRCRRKYRRGAYRMKMYWGRTRGGMRCR | 18120 |
| Bhutan-09027    | CTKSRSAYYTTKWYARCTYRCCGGRRGRRCYRTRCRRKYRRGAYRMKMYWGRTRGGMRCR | 18120 |
| Bhutan-09030    | CTKSRSAYYTTKWYARCTYRCCGGGGRRRCYRTRCRRKYRRGAYRMKMYWGRTRGGMRCR | 18120 |
| Bhutan-09005    | MCGCAGWCYWTGWCAAMYCYAYMRGGRRRSKRYCGATTARSRCGAGCCTAGAGRCAGCG  | 18120 |
| Indonesia-88035 | MYKCAGWCYWTGWCRAMYCYAYMRGGRRRSKRYCGATYARSRCRMKCYWRGWRCAGCG   | 18120 |
| Indonesia-88045 | MYKCAGWCYWTGWCRAMYCYAYMRGGRRRSKRYCGATYARSRCRMKCYWRGWRCAGCG   | 18120 |
| Indonesia-88065 | MCGCAGWCYWTGWCAAMYCYAYMRGGRRRSKRYCGATYARSRCRMKCYWRGWRCAGCG   | 18120 |

. . \* \* \* \*\* . \* . \*

Bhutan-09015 YMRWAAGGYRCGCTAAAAATSACMCTAYYYSYAKGRRRYWYGRRCRYRRRYYTGAYYAYGM 18180  
 Bhutan-09024 YMRWAAGGYRCGCTAAAAATSACMCTAYCTSYAKGRRRYWYGRRCRYRRRYYTGAYYAYGM 18180  
 Bhutan-09027 YMRWAAGGYRCGCTAAAAATSACMCTAYCTSYAKGRRRYTTGRRCRYRRRYYTGAYYAYGM 18180  
 Bhutan-09030 YMRWAAGGYRCGCTAAAAATSACMCTAYCTSYAKGRRRYTTGRRCRYRRRYYTGAYYAYGM 18180  
 Bhutan-09005 YCRAWKRKYRSSGYRRGGYGGTMYRCTCCTAKGAGRCWYRAGCACGGACYKAYTWTAM 18180  
 Indonesia-88035 YCRAWKRKYRSSGYRRGGYGGTMYRCTCCTWKRAGRCWYRAGCACGGACYKAYTWTAM 18180  
 Indonesia-88045 YCRAWKRKYRSSGYRRGGYGGTMYRCTCCTAKRAGRCWYRAGCACGGACYKAYTWTAM 18180  
 Indonesia-88065 YCRAWKRKYRSSGYRRGGYGGTMYRCTCCTAKGAGRCWYRAGCACGGACYKAYTWTAM 18180  
 \* \* \*\* . . . . \* . \* \* \* \* \*

Bhutan-09015 TYGARGGARCCGWYRAGACTKACAAGTYTTGTYTGMRRKRGYRCYAAACMYGMWYK 18240  
 Bhutan-09024 TYGARGGARCCGWYRAGACTKACAAGTYTTGTYTGMRRKRGYRCYAAACMYGMWYK 18240  
 Bhutan-09027 TYGARGGARCCGWYRAGACTKACAAGTYTTGTYTGMRRKRGYRCYAAACMYGMWYK 18240  
 Bhutan-09030 TYGARGGARCCGWYRAGACTGACAAGTYTTGTYTGMRRKRGYRCYAAACMYGMWYK 18240  
 Bhutan-09005 CTSCARRRGAYRAYRRRYACGRMTMTCYCCYRCTCYRAAGGGYGYTCMRRYTCYRAWYK 18240  
 Indonesia-88035 CTSCARRRGAYRAYRRRAMCKATAWCYCCTRYCYRAAGGGYGYTCMRRYTCYRAWYK 18240  
 Indonesia-88045 CTSCARRRGAYRAYRRRAMCKATAWCYCCTRYCYRAAGGGYGYTCMRRYTCYRAWYK 18240  
 Indonesia-88065 CTSCARRRGAYRAYRRRYACGRMTMTCYCCYRCTCYRAAGGGYGYTCMRRYTCYRAWYK 18240  
 . . \*\* . \*\* . \* \* \*\*

Bhutan-09015 KGCAAKCAARTCRKWKMARATRRRWRWAWYTYACRCTTYYYCACRMWWAYCRKGTSAAG 18300  
 Bhutan-09024 KGCAAKCAARTCRKWKMARATRRRWRWAWYTYACRCTTYYYCACRMWWAYCRKGTSAAG 18300  
 Bhutan-09027 KGCAAKCAARTCRKWKMARATRRRWRWAWYTYACRCTTYYYCACRMWWAYCRKGTSAAG 18300  
 Bhutan-09030 KGCAAKCAARTCRKWKMARATRRRWRWAWYTYACRCTTYYYCACRMWWAYCRKGTSAAG 18300  
 Bhutan-09005 TKYMGATTRYGGGRKMARRRYAAARTMACYCYRSWWYTYWGGCYATRTRCGGRWCRWR 18300  
 Indonesia-88035 TKYMGATTRYGGGRKMARRRYAAARTMACYCYRSWWYTYWGGCYATRTRCGGRWCRWR 18300  
 Indonesia-88045 TKYMGATTRYGGGRKMARRRYAAARTMACYCYRSWWYTYWGGCYATRTRCGGRWCRWR 18300  
 Indonesia-88065 TKYMGATTRYGGGRKMARRRYAAARTMACYCYRSWWYTYWGGCYATRTRCGGRWCRWR 18300  
 . . . . : \* \*\* \* \* \* \* . \*

Bhutan-09015 KGAGRRARATKYGCMYARYYMSTTYTATTSYGSTAYTTGAAGYRTYYAMGARWSYWCKR 18360  
 Bhutan-09024 TGAGRRARATKYGCMYARYYMSTTYTATTSYGSTAYTTGAAGYRTYYAMGARWSYWCKR 18360  
 Bhutan-09027 KGAGRRARATKYGCMYARYYMSTTYTATTSYGSTAYTTGAAGYRTYYAMGARWSYWCKA 18360  
 Bhutan-09030 KGAGRRARATKYGCMYARYYMSTTYTATTSYGSTAYTTGAAGYRTYYAMGARWSYWCKR 18360  
 Bhutan-09005 GRRRGAGARKTYRMTTRTTASKYYYRCWTKCYRYYYKWRRYAYYTRCTRGCYWWYKR 18360  
 Indonesia-88035 GRRRGAGARKTYRMTCTRRTMSKYYYRCWTKCTRYYYKWRRYRTYTRCTRGCYWWYKR 18360  
 Indonesia-88045 GRRRGAGARKTYRMTCTRRTMSKYYYRCWTKCTRYYYKWRRYRTYTRCTRGCYWWYKR 18360  
 Indonesia-88065 GRRRGAGARKTYRMTTRTTASKYYYRCWTKCYRYYYKWRRYAYYTRCTRGCYWWYKR 18360  
 . . . \* : \* . \* : . \* \* \* . \*\*\* \*

Bhutan-09015 YTKGCTWCRMRTTYCSKRMMYGYKYKATWTCTYRCYSKRRTCTAYRTGMRMWSYKGCW 18420  
 Bhutan-09024 YTKGCTWCRMRTTYCSKRMMYGYKYKATWTCTYRCYSKRRTCTAYRTGMRMWSYKGCW 18420  
 Bhutan-09027 CTKGCTWCRMRTTYCSKRMMYGYKYKATWTCTYRCYSKRRTCTAYRTGMRMWSYKGCW 18420  
 Bhutan-09030 YTKGCTWCRMRTTYCSKRMMYGYKYKATWTCTYRCYSKRRTCTAYRTGMRMWSYKGCW 18420  
 Bhutan-09005 YATRSYTYGMAGWCTSGTAAMYCTYKYKMYTWGYTATTGTGAYYRCGYSAAAMWTRKATT 18420  
 Indonesia-88035 YTTTRSTTYGMAGWCTSGTAAMYCTYKYKMYTWGYTACTGTGATYRCGYSAAAMWTRKATT 18420  
 Indonesia-88045 YTTTRSTTYGMAGWCTSGTAAMYCTYKYKMYTWGYTACTGTGATYRCGYSAAAMWTRKATT 18420  
 Indonesia-88065 YATRSYTYGMAGWCTSGTAAMYCTYKYKMYTWGYTATTGTGAYYRCGYSAAAMWTRKATT 18420  
 : . . \* . . . \*\* \*\*\*\*\* . . . \*\* \*

Bhutan-09015 ACYRCKYCCATGCTGARAGRSYWWGRRTKRAWYWYGYTYKRGCTWSAGMARCTGRWC 18480  
 Bhutan-09024 ACYRCKYCCATGCTGARAGRSYWWGRRTKRAWYWYGYTYKRGCTWSAGMARCTGRWC 18480

|                 |                                                               |       |
|-----------------|---------------------------------------------------------------|-------|
| Bhutan-09027    | ACYRCKYYCCATGCTGARAGRSYWWGRRTKCRAWYWYYGYTYKRGMTWSAGMARCTGRWC  | 18480 |
| Bhutan-09030    | ACYRCKYYCCATGCTGARAGRSYWWGRRTKCRAWYWYYGYTYKRGMTWSAGMARCTGRWC  | 18480 |
| Bhutan-09005    | RYCGMGCTYGTWRYCARRRRAGTATRRGWKSAMWYTTSRCTYKGYKMYAGMSMRRAYTGAT | 18480 |
| Indonesia-88035 | AYCGMGCTCGTWRYRAARRAGTATRRGWKSAMWYTTSRCTYKGYKMYAGMSMRRAYTGAT  | 18480 |
| Indonesia-88045 | AYCGMGCTCGTWRYRAARRAGTATRRGWKSAMWYTTSRCTYKGYKMYAGMSMRRAYTGAT  | 18480 |
| Indonesia-88065 | RCCGMGCTYGTWRYCARRRRAGTATRRGWKSAMWYTTSRCTYKGYKMYAGMSMRRAYTGAT | 18480 |
|                 | : . * * . ** ** . . * *                                       |       |
| Bhutan-09015    | RCYGGYRRWRWYGYCYKAKWSYCGGYATTTGKTCKTGGWYAASRYAWKCYRRWYTAAMRC  | 18540 |
| Bhutan-09024    | RCYGGYRRWRWYGYCYKAKWSYCGGYATTTGKTCKTGGWYAASRYAWKCYRRWYTAAMRC  | 18540 |
| Bhutan-09027    | RCYGGYRRWRWYGYCYKAKWSYCGGYATTTGKTCKTGGWYAASRYAWKCYRRWYTAAMRC  | 18540 |
| Bhutan-09030    | RCYGGYRRWRWYGYCYKAKWSYCGGYATTTGKTCKTGGWYAASRYAWKCYRRWYTAAMRC  | 18540 |
| Bhutan-09005    | AGTACCAAWGATKTYTGCGAGYTARTRWTTCTKYKAARWCRRCTRWGGCAGTTKRRCRY   | 18540 |
| Indonesia-88035 | AGTGCYAAWGATKTYTGCGAGTTARTAWWYCTKYKAGRWCRRCRTRWGGCAGTTKRRCRY  | 18540 |
| Indonesia-88045 | AGTGCYAAWGATKTYTGCGAGTTARTAWWYCTKYKAGRWCRRCRTRWGGCAGTTKRRCRY  | 18540 |
| Indonesia-88065 | AGTACYAAWGATKTYTGCGAGTTARTATTCTKYKAARWCRRCTRWGGCAGTTKRRCRY    | 18540 |
|                 | . * . . . . . * : . * . * . *                                 |       |
| Bhutan-09015    | ATRRAARWARKKYSSAWTRTSTGTGYGWGGAGGTYTKARAYAKMATGCGYGRWCCGGTACR | 18600 |
| Bhutan-09024    | ATRRAARWARKKYSSAWTRTSTGTGYGWGGAGGTYTKARAYAKMATGCGYGRWCCGGTACR | 18600 |
| Bhutan-09027    | ATRRAARWARKKYSSAWTRTSTGTGYGWGGAGGTYTKARAYAKMATGCGYGRWCCGGTACR | 18600 |
| Bhutan-09030    | ATRRAARWARKKYSSAWTRTSTGTGYGWGGAGGTYTKARAYAKMATGCGYGRWCCGGTACR | 18600 |
| Bhutan-09005    | MYAAWRATCGTGYCCTTTGTCCKRYSYGWGATSKYYTGAGRYRKMRYKMYCGWTCAAWMMG | 18600 |
| Indonesia-88035 | MYAAWAATCGTGYCCTTKGTCKRYSYKWAATSKYYKGMGRYRKMRYGMYCGWTCAAWMMG  | 18600 |
| Indonesia-88045 | MYAAWAATCGTGYCCTTKGTCKRYSYKWAATSKYYKGMGRYRKMRYGMYCGWTCAAWMMG  | 18600 |
| Indonesia-88065 | MYAAWRATCGTGYCCTTTGTCCKRYSYGWGATSKYYTGAGRYRKMRYKMYCGWTCAAWMMG | 18600 |
|                 | . * : . . . * * : . * * * * . *                               |       |
| Bhutan-09015    | RCGGMMCRATAYACTGKMRGTGTYKMMWKKMYSAKARCGTWWGGYGYRATYYGKYRTCG   | 18660 |
| Bhutan-09024    | RCGGMMCRATAYACTGKMRGTGTYKMMWKKMYSAKARCGTWWGGYGYRATYYGKYRTCG   | 18660 |
| Bhutan-09027    | RCGGMMCRATAYACTGKMRGTGTYKMMWKKMYSAKARCGTWWGGYGYRATYYGKYRTCG   | 18660 |
| Bhutan-09030    | RCGGMMCRATAYACTGKMRGTGTYKMMWKKMYSAKARCGTWWGGYGYRATYYGKYRTCG   | 18660 |
| Bhutan-09005    | ACSRAASGCRCWCYRTARTRYKYGCAATYAYCRKWRYAWAAAAWCKTRWYKCTAGCAYCK  | 18660 |
| Indonesia-88035 | AMSRAASGYRYWCYRTARWRYKYGCAATYAYCRKWACATWAAAAWCKTRWYKCTAGCAYCK | 18660 |
| Indonesia-88045 | AMSRAASGYRYWCYRTARWRYKYGCAATYAYCRKWACATWAAAAWCKTRWYKCTAGCAYCK | 18660 |
| Indonesia-88065 | ACSRAASGCRCWCYRTARTRYKYGCAATYAYCRKWRYAWAAAAWCKTRWYKCTAGCAYCK  | 18660 |
|                 | . . . . . ** . * . * . . : * . .                              |       |
| Bhutan-09015    | AYRCMMTRMAGTGTAACACRRAAYRRRYYGATGGTGC SGWYAYRYTYGYTSAAYKMGWA  | 18720 |
| Bhutan-09024    | AYRCMMTRMAGTGTAACACRRAAYRRRYYGATGGTGC SGWYAYRYTYGYTSAAYKMGWA  | 18720 |
| Bhutan-09027    | AYRCMMTRMAGTGTAACACRRAAYRRRYYGATGGTGC SGWYAYRYTYGYTSAAYKMGWA  | 18720 |
| Bhutan-09030    | AYRCMMTRMAGTGTAACACRRAAYRRRYYGATGGTGC SGWYAYRYTYGYTSAAYKMGWA  | 18720 |
| Bhutan-09005    | KYRGMAYAMRRYCYMYMMSAATR TAAGYTSMSRARSRTTRCAYCTRYWTCRWTGASWW   | 18720 |
| Indonesia-88035 | KCRGMAYAMRRYCYMYMMSAATR TAAGYTCCYSRARSRTTRCAYCTRYWTCRWTGASWW  | 18720 |
| Indonesia-88045 | KCRGMAYAMRRYCYMYMMSAATR TAAGYTCCYSRARSRTTRCAYCTRYWTCRWTGASWW  | 18720 |
| Indonesia-88065 | KYRGMAYAMRRYCYMYMMSAATR TAAGYTSMSRARSRTTRCAYCTRYWTCRWTGASWW   | 18720 |
|                 | * * * * . : * . : * * * . *                                   |       |
| Bhutan-09015    | AGRAKTGGGCGYCKAMRAMTAYTTGGTCCRAGAWCGYRCGSYCRSKCYTAGYGCWRRYT   | 18780 |
| Bhutan-09024    | AGRAKTGGGCGYCKAMRAMTAYTTGGTCCRAGAWCGYRCGSYCRSKCYTAGYGCWRRYT   | 18780 |
| Bhutan-09027    | AGRAKTGGGCGYCKAMRAMTAYTTGGTCCRAGAWCGYRCGSYCRSKCYTAGYGCWRRYT   | 18780 |
| Bhutan-09030    | AGRAKTGGGCGYCKAMRAMTAYTTGGTCCRAGAWCGYRCGSYCRSKCYTAGYGCWRRYT   | 18780 |
| Bhutan-09005    | RRRWTKSSKSYRSTMCAAATRYKCRYYYR GARWMACASRCYTRSGSYCCRYCRMARGTW  | 18780 |
| Indonesia-88035 | RRRWTKSSKSYRSTMCATATRYKCRYYYR RAGAMACASRCYTRSGSYCCRYCRMARGTW  | 18780 |

Indonesia-88045 RRRWTKSSKSYRSTMCATACRYKCRYYYYRRAGAMACASRCYTRSGSYCCRYCRMARGTW 18780  
Indonesia-88065 RRRWTKSSKSYRSTMCATAWATRYKCRYYYYRGARWMACASRCYTRSGSYCCRYCRMARGTW 18780  
\* . . . . \* \* . . \* . . . \* \* \* \* \* \* \*

Bhutan-09015 RGKTRCRCYCGWCACWGGSWYAWCGYYTYAGCCRYAGYTCWRYYYARYARAGACGATMR 18840  
Bhutan-09024 RGKTRCRCYCGWCACWGGSWYAWCGYYTYAGCCRYAGYTCWRYYYARYARAGACGATMR 18840  
Bhutan-09027 RGKTRCRCYCGWCACWGGSWYAWCGYYTYAGCCRYAGYTCWRYYYARYARAGACGATMR 18840  
Bhutan-09030 RGKTRCRCYCGWCACWGGSWYAWCGYYTYAGCCRYAGYTCWRYYYARYARAGACGATMR 18840  
Bhutan-09005 AAKYAMRMTYAWYMMWRSACRTYKYCYMATYGYWRTCTWGYYTWATGGKRSRMWR 18840  
Indonesia-88035 AAKYRCRMTYAWYMMWRSACRWCKYCYMATYGYWRTCTWGYYTWATGGKRSRMWR 18840  
Indonesia-88045 AAKYRCRMTYAWYMMWRSACRWCKYCYMATYGYWRTCTWGYYTWATGGKRSRMWR 18840  
Indonesia-88065 AAKYAMRMTYAWYMMWRSACRTYKYCYMATYGYWRTCTWGYYTWATGGAKRSRMWR 18840  
.\* \* .\* \* .. \*\* \* \* . \* \* \* \* . . \*

Bhutan-09015 SKRYTCSYTGAGAWRMGAYRSTGACGRRYGARRTYWGTTKAYGYCKRGACARTMWYCA 18900  
Bhutan-09024 SKRYTCSYTGAGAWRMGAYRSTGACGRRYGARRTYWGTTKAYGYCKRGACARTMWYCA 18900  
Bhutan-09027 SKRYTCSYTGAGAWRMGAYRSTGACGRRYGARRTYWGTTKAYGYCKRGACARTMWYCA 18900  
Bhutan-09030 SKRYTCSYTGAGAWRMGAYRSTGACGRRYGARRTYWGTTKAYGYCKRGACARTMWYCA 18900  
Bhutan-09005 SGACKCSTTKRRRTAACGWACACYRAYGGACGRAAWTWKKGWCCYYKGSRYRAWCWMMT 18900  
Indonesia-88035 SGACKMCTCRRRTAACGWACACYRAYGGACGRAAWTWKKGWCCYYKGSACRAWCWMMT 18900  
Indonesia-88045 SGACKMCTCRRRTAACGWACACYRAYGGACGRAAWTWKKGWCCYYKGSACRAWCWMMT 18900  
Indonesia-88065 SGACKCSTTKRRRTAACGWACACYRAYGGACGRAAWTWKKGWCCYYKGSRYRAWCWMMT 18900  
\* . . : . \* .\* \* \* \* \* \* \* :

Bhutan-09015 GTYCGRWWGAGTTGRYYGGYTTTTMSATARKYYRTCGTRKYGYTCACACCCGYRYRAYRT 18960  
Bhutan-09024 GTYCGRWWGAGTTGRYYGGYTTTTMSATARKYYRTCGTRKYGYTCACACCCGYRYRAYRT 18960  
Bhutan-09027 GTYCGRWWGAGTTGRYYGGYTTTTMSATARKYYRTCGTRKYGYTCACACCCGYRYRAYRT 18960  
Bhutan-09030 GTYCGRWWGAGTTGRYYGGYTTTTMSATARKYYRTCGTRKYGYTCACACCCGYRYRAYRT 18960  
Bhutan-09005 KCTYGRWTRWYTRATYGRYYKYCSRATYCRYRGATCRTKYWSGYRYRTATARYGY 18960  
Indonesia-88035 GCTYSRTTRWYTRATYGRYYKYCSRATYCRYRYRTATCRTKYASGYRYRTATARYGY 18960  
Indonesia-88045 GCTYSRTTRWYTRATYGRYYKYCSRATYCRYRYRTATCRTKYASGYRYRTATARYGY 18960  
Indonesia-88065 KCTYGRWTRWYTRATYGRYYKYCSRATYCRYRYRGATCRTKYWSGYRYRTATARYGY 18960  
.\* \* . . . \* \* . . . \*

Bhutan-09015 YWYKWRKSRTCYMYMYKATTTTACRAYCYKARYCYMWMWGYMWTWATRMYGWYWSY 19020  
Bhutan-09024 YWYKWRKSRTCYMYMYKATTTTACRAYCYKARYCYMWMWGYMWTWATRMYGWYWSY 19020  
Bhutan-09027 YWYKWRKSRTCYMYMYKATTTTACRAYCYKARYCYMWMWGYMWTWATRMYGWYWSY 19020  
Bhutan-09030 YWYKWRKSRTCYMYMYKATTTTACRAYCYKARYCYMWMWGYMWTWATRMYGWYWSY 19020  
Bhutan-09005 TWCTWRGGRYYYAYMCKRWYKRMWCTTTMGYYTMTGATKTCCTWWWKAMYRAYWASYA 19020  
Indonesia-88035 TWCTWRGGRYYYAYMCKRWYKRMWCTTTMGYYTMTGATKTCCTWWWKAMYRAYWASYA 19020  
Indonesia-88045 TWCTWRGGRYYYAYMCKRWYKRMWCTTTMGYYTMTGATKTCCTWWWKAMYRAYWASYA 19020  
Indonesia-88065 TWCTWRGGRYYYAYMCKRWYKRMWCTTTMGYYTMTGATKTCCTWWWKAMYRAYWASYA 19020  
\* .\* \* \* \* \* . . \* \* \* . \* \* \* \* \*

Bhutan-09015 SRSCWYSTKRARTCGRTTYRATSRYRACYSKAKMSSTGATGWTRWATTYWTARKARRA 19080  
Bhutan-09024 SRSCWYSYKRARTCGRTTYRATSRYRACYSKAKMSSTGATGWTRWATTYWTARKARRA 19080  
Bhutan-09027 SRSCWYSYKRARTCGRTTYRATSRYRACYSKAKMSSTGATGWTRWATTYWTARKARRA 19080  
Bhutan-09030 SRSCWYSTTRARTCGRTTYRATSRYRACYSKAKMSSTGATGWTRWATTYWTARKARRA 19080  
Bhutan-09005 CAGSTTCYGARACYRAGYRKMKGWYGYKCGYRTMSKYSRWRWWAARGWTTYWRTRAAR 19080  
Indonesia-88035 CAGSTTCYGARACYRAGYRKMKGAYGYKCGYRTMSKYSRWRWWAARGWTTYWRTRAAR 19080  
Indonesia-88045 CAGSTTCYGARACYRAGYRKMKGAYGYKCGYRTMSKYSRWRWWAARGWTTYWRTRAAR 19080  
Indonesia-88065 CAGSTTCYGARACYRAGYRKMKGWYGYKCGYRTMSKYGATGWWAARGWTTYWRTRAAR 19080  
. . . . \*\* . \* . . . \* \* . \*



Bhutan-09015 YRRMYCRYYRTCGGMWRAKWGRWRKCCYGCCRRGYRKRWRKCCWAMGCTGRGAAATRR 19140  
 Bhutan-09024 YRRMYCRYYRTCGGMWRAKWGRWRKCCYGCCRRGYRKRWRKCCWAMGCTGRGAAATRR 19140  
 Bhutan-09027 YRRMYCRYYRTCGGMWRAKWGRWRKCCYGCCRRGYRKRWRKCCWAMGCTGRGAAATRR 19140  
 Bhutan-09030 YRRMYCRYYRTCGGMWRAKWGRWRKCCYGCCRRGYRKRWRKCCWAMGCTGRGAAATRR 19140  
 Bhutan-09005 TAACTYAYCRKYRRAWRRKACRWGKKTCTRTTGATGTAAATKAWWMRTYRGRAGRATGRR 19140  
 Indonesia-88035 TAACTYAYCRKYRRAWRRKACRWGKKTCTRTTGATGTAAATKAWWMRTYRGRAGRATGRR 19140  
 Indonesia-88045 TAACTYAYCRKYRRAWRRKACRWGKKTCTRTTGATGTAAATKAWWMRTYRGRAGRATGRR 19140  
 Indonesia-88065 TAACTYAYCRKYRRAWRRKACRWGKKTCTRTTGATGTAAATKAWWMRTYRGRAGRATGRR 19140

\* \* . \*\* \* \*\* \* \* . . . \* \* . . \*

Bhutan-09015 CWYYGSSAYRGRKGKAYGWTTKCCRAYYKTYYCRGTRTRAYTRRRCWACGGRACRCRY 19200  
 Bhutan-09024 CWYYGSSAYRGRKGKAYGWTTKCCRAYYKTYYCRGTRTRAYTRRRCWACGGRACRCRY 19200  
 Bhutan-09027 CWYYGSSAYRGRKGKAYGWTTKCCRAYYKTYYCRGTRTRAYTRRRCWACGGRACRCRY 19200  
 Bhutan-09030 CWYYGSSAYRGRKGKAYGWTTKCCRAYYKTYYCRGTRTRAYTRRRCWACGGRACRCRY 19200  
 Bhutan-09005 TACTTCCRCAGAGGTRAYYTCGYAWTTTAYTYASYGCGRTYGGACATSRKAGSRTGCT 19200  
 Indonesia-88035 TAYYTSSGCAKAGAGGTAATTCGYRATTTTYTYASCYCGRTYGGAYATSRKAGSRTGCT 19200  
 Indonesia-88045 TAYYTSSGCAKAGAGGTAATTCGYRATTTCTYASCYCGRTYGGAYATSRKAGSRTGCT 19200  
 Indonesia-88065 TACTTCCRCAGAGGTRAYYTCGYAWTTTAYTYASYGCGRTYGGACATSRKAGSRTGCT 19200

. . . . . : . . . . \*

Bhutan-09015 WRRKARAYYCGTTSCCYATMGAAASRYAYARRCAMYMCTKTSTCRAGAAMTSMASARYSA 19260  
 Bhutan-09024 WGRKARAYYCGTTSCCYATMGAAASRYAYARRCAMYMCTKTSTCRAGAAMTSMASARYSA 19260  
 Bhutan-09027 WGRKARAYYCGTTSCCYATMGAAASRYAYARRCAMYMCTKTSTCRAGAAMTSMASARYSA 19260  
 Bhutan-09030 WARKARAYYCGTTSCCYATMGAAASRYAYARRCAMYMCTKTSTCRAGAAMTSMASARYSA 19260  
 Bhutan-09005 WGAKWAWCCYSWYSTSYARKATRWGACATRRRSMCCAMYKWCYAGRRWATCYCACRGTCW 19260  
 Indonesia-88035 WGAKWAWCCYSWYSTSYARKATRWGRYWRRRSMCCAMYKWCYAGRRWATCYCACRGTCW 19260  
 Indonesia-88045 WGAKWAWCCYSWYSTSYARKATRWGRYWRRRSMCCAMYKWCYAGRRWATCYCACRGTCW 19260  
 Indonesia-88065 WGAKWAWCCYSWYSTSYARKATRWGACATRRRSMCCAMYKWCYAGRRWATCYCACRGTCW 19260

\* \* . \* \* . . . \*\* . \* . . . .

Bhutan-09015 KSGAWRCGGTRCGRRAYTCAGRGGCMRGAARRYAATWCWSCWWRWRYKYRYYYKRGK 19320  
 Bhutan-09024 KSGAWRCGGTRCGRRAYTCAGRGGCMAAGAARRYAATWCWSCWWRWRYKYRYYYKRGK 19320  
 Bhutan-09027 KSGAWRCGGTRCGRRAYTCAGRGGCMRGAARRYAATWCWSCWWRWRYKYRYYYKRGK 19320  
 Bhutan-09030 KSGAWRCGGTRCGRRAYTCAGRGGCMRGAARRYAATWCWSCWWRWRYKYRYYYKRGK 19320  
 Bhutan-09005 KSRGAGYKRKRTRAARTYRARSYCAAKWWARCRMYTMWSCTTATGYKTTGCYYTAGRM 19320  
 Indonesia-88035 KSRGAGYKRKRTRAARTYRARSYCAAKWWARCRMYTMWSCTTATGYKTTGCYYTAGRM 19320  
 Indonesia-88045 KSRGAGYKRKRTRAARTYRARSYCAAKWWARCRMYTMWSCTTATGYKTTGCYYTAGRM 19320  
 Indonesia-88065 KSRGAGYKRKRTRAARTYRARSYCAAKWWARCRMYTMWSCTTATGYKTTGCYYTAGRM 19320

\*\* . \* . \* . . \* \* . . . \*\* \*\* .

Bhutan-09015 YYCSYRSTTCMTCRCSCYGYSSYRCWTAYKAYWCSTGTTCGGCTTASYTSAMSGGATA 19380  
 Bhutan-09024 YYCSYRSTTCMTCRCSCYGYSSYRCWTAYKAYWCSTGTTCGGCTTASYTSAMSGGATA 19380  
 Bhutan-09027 YYCSYRSTTCMTCRCSCYGYSSYRCWTAYKAYWCSTGTTCGGCTTASYTSAMSGGATA 19380  
 Bhutan-09030 YYCSYRSTTCMTCRCSCYGYSSYRCWTAYKAYWCSTGTTCGGCTTASYTSAMSGGATA 19380  
 Bhutan-09005 CYASYRGTSCYGYGMSYCRSCYRTWARCTWCWYSWKKYSRRSKACSYCGWMCATGWGG 19380  
 Indonesia-88035 CYASYRGTSCYGYGMSYCRSCYRTWARCTWCWYSWKKYSRRSKACSYCGWMCATGWGG 19380  
 Indonesia-88045 CYASYRGTSCYGYGMSYCRSCYRTWARCTWCWYSWKKYSRRSKACSYCGWMCATGWGG 19380  
 Indonesia-88065 CYASYRGTSCYGYGMSYCRSCYRTWARCTWCWYSWKKYSRRSKWMSYCSWMCATGWGG 19380

\* . \* \* . . . \* \* \* \* . : . \* \* . \* . . . \* \* . \* . . :

Bhutan-09015 RGGTYWYATATCATAATSRYYRYARSAMYKAWRAWKTKWCKWAYARCWSKMTGKTYRRR 19440  
 Bhutan-09024 RGGTYWYATATCATAATGATRYRYARSAMYKAWRAWKTKWCKWAYARCWSKMTGKTYRRR 19440  
 Bhutan-09027 RGGTYWYATATCATAATSRYYRYARSAMYKAWRAWKTKWCKWAYARCWSKMTGKTYRRR 19440  
 Bhutan-09030 RGGTYWYATATCATAATSRYYRYARSAMYKAWRAWKTKWCKWAYARCWSKMTGKTYRRR 19440

Bhutan-09005 GRAGTAYYRAMGAWMCGATGCACGRSKRMCTRWRWTKYKWCWMMYRGYTRKACAKAYYRRG 19440  
Indonesia-88035 GRAGTAYYGAAGATMCGATGCACGRSKRMCTRWRWTKYKWCWMMYRGYTRKACAKAYYRRG 19440  
Indonesia-88045 GRAGTAYYRAMGATMCGATGCACGRSKRMCTRWRWTKYKWCWMMYRGYTRKACAKAYYRRG 19440  
Indonesia-88065 GRAGTAYYRAMGAWMCGATGCACGRSKRMCTRWRWTKYKWCWMMYRGYTRKACAKAYYRRG 19440  
. \* : .: . .\*\* \* . \*\* \* \* \* \* \* \* \* . \* \*\*

Bhutan-09015 GAGRYRWRGYAYCKGAYTACYKRSACAYCCGATYCCCKYACRCTTGSCGKMWCYTYYYCA 19500  
Bhutan-09024 GAGRYRWRGYAYCKGAYTACYKRSACAYCCGATYCCCKYACRCTTGSCGKMWCYTYYYCA 19500  
Bhutan-09027 GAGRYRWRGYAYCKGAYTACYKRSACAYCCGATYCCCKYACRCTTGSCGKMWCYTYYYCA 19500  
Bhutan-09030 GAGRYRWRGYAYCKGAYTACYKRSACAYCCGATYCCCKYACRCTTGSCGKMWCYTYYYCA 19500  
Bhutan-09005 SWRRCKAAATRYSTRCTGWYTTAGCYRYAMGTYSGGKYRSAYWYSGYRTAASTWCTTAR 19500  
Indonesia-88035 SWRRCKAAATRYSTRCTGWYTTAGCYRYCMKTYTSGGKYRSAYWYSGYRTAASTWCTTAR 19500  
Indonesia-88045 SWRRCKAAATRYSTRCTGWYTTAGCYRYCMKTYTSGGKYRSAYWYSGYRTAASTWCTTAR 19500  
Indonesia-88065 SWRRCKAAATRYSTRCTGWYTTAGCYRYAMGTYSGGKYRSAYWYSGYRTAASTWCTTAR 19500  
. \* . \*.. . . . . \* . : . \*\* . . . . .

Bhutan-09015 CGGRRTGCGTGRCSSRYTWCCGMRTYTWRAYATARYKKCCARTTSACSRAGGGYTCYM 19560  
Bhutan-09024 CGGRRTGCGTGRCSSRYTWCCGMRTYTWRAYATARYKKCCARTTSACSRAGGGYTCYM 19560  
Bhutan-09027 CGGRRTGCGTGRCSSRYTWCCGMRTYTWRAYATARYKKCCARTTSACSRAGGGYTCYM 19560  
Bhutan-09030 CGGRRTGCGTGRCSSRYTWCCGMRTYTWRAYATARYKKCCARTTSACSRAGGGYTCYM 19560  
Bhutan-09005 YRTAGKRARYRGYGGRYCACYRCGTCWTGCMCAAAAYKKAATGGYWSRYGARRTTAYYYTA 19560  
Indonesia-88035 CGTAGKRARYRGYGGRYCACYRCGTCWTGCMCAAAAYKKAATGGYWSRYGARRTTAYYYTA 19560  
Indonesia-88045 CGTAGKRARYRGYGGRYCACYRCGTCWTGCMCAAAAYKKAATGGYWSRYGARRTTAYYYTA 19560  
Indonesia-88065 YRTAGKRARYRGYGGRYCACYRCGTCWTGCMCAARAYKKAAYRGYWSRYGARRTTAYYYTA 19560  
. . . . \*\* : \*\*\* . \* . . \*

Bhutan-09015 MGGATTTCKARRRYTYRGSYAAGYAGKGATYYWCCTGTCKYAARYCRRCYMYCYWGGY 19620  
Bhutan-09024 MGGATTTCKARAAYTYRGSYAAGYAGKGATYYWCCTGTCKYAARYCRRCYMYCYWGGY 19620  
Bhutan-09027 MGGATTTCKARRRYTYRGSYAAGYAGKGATYYWCCTGTCKYAARYCRRCYMYCYWGGY 19620  
Bhutan-09030 MGGATTTCKARRRYTYRGSYAAGYAGKGATYYWCCTGTCKYAARYCRRCYMYCYWGGY 19620  
Bhutan-09005 CKKGWTKRATGCYTTRASYYRRMAGGGWTTTMMYRYKMCWRATYGGYCYAYGCTGGT 19620  
Indonesia-88035 MKGGTKTTKRAAGCYTTRASYYARRTAAKGGTTTTMMYRYKMCAAAATYGGYCYAYGCTGAT 19620  
Indonesia-88045 MKGGTKTTKRAAGCYTTRASYYARRTAAKSGTTTTMMYRYKMCAAAATYGGYCYAYGCTGRT 19620  
Indonesia-88065 CKKGWTKRATGCYTTRASYYARRMAGGGWTTTMMYRYTACWRATYGGYCYAYGCTGGT 19620  
. \* \*..\*\* . . . . \*

Bhutan-09015 AYRGTRMRTSGGGCWCGRTRYYRGGTGGAGAMARYRAGRYAKTYYYRTMMSMGYGWYY 19680  
Bhutan-09024 AYRGTRMRTSGGGCWCGRTRYYRGGTGGAGAMARYRAGRYAKTYYYRTMMSMGYGWYY 19680  
Bhutan-09027 AYRGTRMRTSGGGCWCGRTRYYRGGTGGAGAMARYRAGRYAKTYYYRTMMSMGYGWYY 19680  
Bhutan-09030 AYRGTRMRTSGGGCWCGRTRYYRGGTGGAGAMARYRAGRYAKTYYYRTMMSMGYGWYY 19680  
Bhutan-09005 TCRTYAMGYRCKSAMTYRAAATCYRARWCRRRMRATARRGYGGGTTTCAYMMGMRATCC 19680  
Indonesia-88035 ACRTYAMGYRCKSAMTYRAAATCYRARWCRRRMRATARRGYGGGTTTCAYMMGMRATCC 19680  
Indonesia-88045 ACRTYAMGYRCKSAMTYRAAATCYRARWCRRRMRATARRGYGGGTTTCAYMMGMRATCC 19680  
Indonesia-88065 TCRTYAMGYRCKSAMTYRAAATCYRARWCRRRMRATARRGYAGKTTTCAYCMMRATCC 19680  
: \* \* . . . : \*\* . \* \* . \*\* .

Bhutan-09015 GRGYYGCAKMTYGRRRASMGTYKMYKWAGGSCGCYYATAGTAWSSMRYWAWYACGGW 19740  
Bhutan-09024 GRGYYGCAKMTYGRRRASMGTYKMYKWAGGSCGCYYATAGTAWSSMRYWAWYACGGW 19740  
Bhutan-09027 GRGYYGCAKMTYGRRRASMGTYKMYKWAGGSCGCYYATAGTAWSSMRYWAWYACGGW 19740  
Bhutan-09030 GRGYYGCAKMTYGRRRASMGTYKMYKWAGGSCGCYYATAGTAWSSMRYWAWYACGGW 19740  
Bhutan-09005 KASCTCARGCCYTGSGGSCRWCKCTYKWTCCATTCTGYWCMASCYGWRTYWRMKTW 19740  
Indonesia-88035 KASCTCARGCCYTGSGGSCRWCKCTYKWTCCATTCTGYWCMASSTMYGWRTYWRMKTW 19740  
Indonesia-88045 KASCTCARGCCYTGSGGSCRWCKCTYKWTCCATTCTGYWCMASSTMYGWRTYWRMKTW 19740  
Indonesia-88065 KASCTCARGCCYTGSGGSCRWCKCTYKWTCCATTCTGYWCMASCYGWRTYWRMKTW 19740

```

. . * . * * * . . . * * * *
Bhutan-09015 RSSRAYTRCYGRSAWYAYCATYMYARRKWGYRACYMRYCYTYRTWAWWRRYWTAYCG 19800
Bhutan-09024 RSSRAYTRCYGRSAWYAYCATYMYARRKWGYRACYMRYCYTYRTWAWWRRYWTAYCG 19800
Bhutan-09027 RSSRAYTRCYGRSAWYAYCATYMYARRKWGYRACYMRYCYTYRTWAWWRRYWTAYCG 19800
Bhutan-09030 RSSRAYTRCYGRSAWYAYCATYMYARRKWGYRACYMRYCYTYRTWAWWRRYWTAYCG 19800
Bhutan-09005 ASGGGTCAMTRRCWTCRYTGTYMYRRAGWATYRRMYCSRGGTTWCGWMTMTAACACWTYS 19800
Indonesia-88035 ASGGGTCAMTRRCWTCRYTGTYMYRRAGWATYRRMYCSRGGTTWCGWMTMTAACACWTYS 19800
Indonesia-88045 ASGGGTCAMTRRCWTCRYTGTYMYRRAGWATYRRMYCSRGGTTWCGWMTMTAACACWTYS 19800
Indonesia-88065 ASGGGTCAMTRRCWTCRYTGTYMYRRAGWATYRRMYCSRGGTTWCGWMTMTAACACWTYS 19800
* . . * . * * * * . * * * .
Bhutan-09015 WRWTRGMKMRYGKGAKMKTRYGWGRTYYSGRKWKYAMTKGYAGARTKAYMRGKYYYSRG 19860
Bhutan-09024 WRWTRGMKMRYGKGAKMKTRYGWGRYYYSGRKWKYAMTKGYAGARTKAYMRGKYYYSRG 19860
Bhutan-09027 WRWTRGMKMRYGKGAKMKTRYGWGATYYSGTRKWKYAMTKGYAGARTKAYMRGKYYYSRG 19860
Bhutan-09030 WRWTRGMKMRYGKGAKMKTRYGWGATYYSGTRKWKYAMTKGYAGARTKAYMRGKYYYSRG 19860
Bhutan-09005 AGWYGRAKAAYKKTGKATYRCKWRATYYCSWRKWCRAYGSTTRRTRCKRCMARKYTYCGR 19860
Indonesia-88035 AGWYGRAKAAYKKTGKATYRCKWRATYYCSWRKWCRAYGSTTRRTRCKRCMARKYTYCGR 19860
Indonesia-88045 AGWYGRAKAAYKKTGKATYRCKWRATYYCSWRKWCRAYGSTTRRTRCKRCMARKYTYCGR 19860
Indonesia-88065 AGWYGRAKAAYKKTGKATYRCKWRATYYCSWRKWCRAYGSTTRRTRCKRCMARKYTYCGR 19860
* * * * * . * * * * * . * * * * * .
Bhutan-09015 RRRMCYWTSSGKTYMCGATSRCWRMGSYSTYMYCRAGKGWYTGAGKRARARRSGTW 19920
Bhutan-09024 RRRMCYWTSSGKTYMCGATSRCWRMGSYSTYMYCRAGKGWYTGAGKRARARRSGTW 19920
Bhutan-09027 RRRMCYWTSSGKTYMCGATSRCWRMGSYSTYMYCRAGKGWYTGAGKRARARRSGTW 19920
Bhutan-09030 RRRMCYWTSSGKTYMCGATSRCWRMGSYSTYMYCRAGKGWYTGAGKRARARRSGTW 19920
Bhutan-09005 ARRAMYAYGCGGTYCAYARYGATTRARGCCGYTCRYYAWSGAWCCWSWAGARRRGSSKKT 19920
Indonesia-88035 ARRAMYAYGCGGTYCAYARYGATTRARGCCGYTCRYYAWSGAWCCWSWAGARRRGSSKKT 19920
Indonesia-88045 ARRAMYAYGCGGTYCAYARYGATTRARGCCGYTCRYYAWSGAWCCWSWAGARRRGSSKKT 19920
Indonesia-88065 ARRAMYAYGCGGTYCAYARYGATTRARGCCGYTCRYYAWSGAWCCWSWAGARRRGSSKKT 19920
** * . . * . . * . . * . . * * .
Bhutan-09015 GYMYMAKKARGRKYCTKRRGARYCYCGARYRTAAKCTSRASCRAWTYTTMRRACAWGCR 19980
Bhutan-09024 GYMYMAKKARGRKYCTKRRGARYCYCGARYRTAAKCTSRASCRAWTYTTMRRACAWGCR 19980
Bhutan-09027 GYMYMAKKARGRKYCTKRRGARYCYCGARYRTAAKCTSRASCRAWTYTTMRRACAWGCR 19980
Bhutan-09030 GYMYMAKKARGRKYCTKRRGARYCYCGARYRTAAKCTSRASCRAWTYTTMRRACAWGCR 19980
Bhutan-09005 RYMYMTTKRASGKTYWTAGACGTYTMAMACRKRRTYWCAMSMASRTYTYAGAGAWWRSA 19980
Indonesia-88035 RYMYMTTKRASGKTYWTAGACGTYTMAMACRKRRTYWCAMSMASRTYTYAGAGAWWRSA 19980
Indonesia-88045 RYMYMTTKRASGKTYWTAGACGTYTMAMACRKRRTYWCAMSMASRTYTYAGAGAWWRSA 19980
Indonesia-88065 RYMYMTTKRASGKTYWTAGACGTYTMAMACRKRRTYWCAMSMASRTYTYAGAGAWWRSA 19980
****:.* . * . . . * . . * * . . * .
Bhutan-09015 AYRYTCYWRYKTCAGRRAWRRRTASTGWWSTAWYWYRCYMYSSCTTMARYRYTGMYRYCY 20040
Bhutan-09024 AYRYTCYWRYKTCAGRRAWRRRTASTGWWSTAWYWYRCYMYSSCTTMARYRYTGMYRYCY 20040
Bhutan-09027 AYRYTCYWRYKTCAGRRAWRRRTASTGWWSTAWYWYRCYMYSSCTTMARYRYTGMYRYCY 20040
Bhutan-09030 AYRYTCYWRYKTCAGRRAWRRRTASTGWWSTAWYWYRCYMYSSCTTMARYRYTGMYRYCY 20040
Bhutan-09005 RCGYWTAAACGYMRSGGMAGGYMCKRWTSYWACACGSTCMCCTKYMGGYRYAATAAYCY 20040
Indonesia-88035 RCGYWTAAACGYMRSGGMAGGYMCKRWTSYWACACGSTCMCCTKYMGGYRYAATAAYCY 20040
Indonesia-88045 RCGYWTAAACGYMRSGGMAGGYMCKRWTSYWACACGSTCMCCTKYMGGYRYAATAAYCY 20040
Indonesia-88065 RCGYWTAAACGYMRSGGMAGGYMCKRWTSYWACACGSTCMCCTKYMGGYRYAATAAYCY 20040
* . . * * . . * * . * * * . * * *
Bhutan-09015 RTMCGGYTKRWRGKGGARWMMYRRRTAYCCKYGCCATYKRYCRCWYWGYSYRSRRGRGWR 20100
Bhutan-09024 RTMCGGYTKRWRGKGGARWMMYRRRTAYCCKYGCCATYKRYCRCWYWGYSYRSRRGRGWR 20100

```

Bhutan-09027 RTMCGGYTKRWRGKGGARWMMYRRTAYCCKYGCCATYKRYCRCWYWGYSYRSRRGRGWR 20100

Bhutan-09030 RTMCGGYTKRWRGKGGARWMMYRRTAYCCKYGCCATYKRYCRCWYWGYSYRSRRGRGWR 20100

Bhutan-09005 RYMMSKTYTAARKTSKTATACYARKGTYGTTTATATGGTYATTTTCSCCYRSRGRSAA 20100

Indonesia-88035 RYMMSKTYTAARKTSKTATACYARKGTYGTTTATATGGTCATTTTCSCCYRSRGRASAA 20100

Indonesia-88045 RYMMSKTYTAARKTSKTATACYARKGTYGTTTATATGGTYATTTTCSCCYRSRGRSAA 20100

Indonesia-88065 RYMMSKTYTAARKTSKTATACYARKGTYGTTTATATGGTCATTTTCSCCYRSRGRSAA 20100

\* \* . \* .. : \* \*.. .:: . .\*\*\*\* .

Bhutan-09015 CTAACAMKRSYMYMWRMTTRGYWTCGRSRGAKCACYTSRGYRGARCCSYTCGRYTCYWMT 20160

Bhutan-09024 CTAACAMKRSYMYMWRMTTRGYWTCGRSRGAKCACYTSRGYRGARCCSYTCGRYTCYWMT 20160

Bhutan-09027 CTAACAMKRSYMYMWRMTTRGYWTCGRSRGAKCACYTSRGYRGARCCSYTCGRYTCYWMT 20160

Bhutan-09030 CTAACAMKRSYMYMWRMTTRGYWTCGRSRGAKCACYTSRGYRGARCCSYTCGRYTCYWMT 20160

Bhutan-09005 MCGRMTAGAGYCTMTGMYARRCAYMAGCAAGTMGYAGASTGRRGMYCTYCARCKMYWCY 20160

Indonesia-88035 MCGRMTAGAGYCTMTGMYARRCAYMAGCAAGTMGYAGASTGRRGMYCTYMRCKMYWCY 20160

Indonesia-88045 MCGRMTAGAGYCTMTGMTARRCAYMAGCAAGTMGYAGASTGRRGMYCTYMRCKMYWCY 20160

Indonesia-88065 MCGRMTAGAGYCTMTGMYARRCAYMAGCAAGTMGYAGASTGRRGMYCTYCARCKMYWCY 20160

. : .\* \* \* : \* . . . . \* : . . \* . \*\*

Bhutan-09015 CKRARSTGTRGGCYAMTRGYRGWKTARAYRRGCSTARMRTACCRSTAAACYWMMRRCYR 20220

Bhutan-09024 CKRARSTGTRGGCYAMTRGYRGWKTARAYRRGCSTARMRTACCRSTAAACYWMMRRCYR 20220

Bhutan-09027 CKRARSTGTRGGCYAMTRGYRGWKTARAYRRGCSTARMRTACCRSTAAACYWMMRRCYR 20220

Bhutan-09030 CKRARSTGTRGGCYAMTRGYRGWKTARAYRRGCSTARMRTACCRSTAAACYWMMRRCYR 20220

Bhutan-09005 MGGCGSCGGGGRATMCKAKCARWYRGAARRGTGKMAMAYMYGSRWMMCTTTAACGATG 20220

Indonesia-88035 MGGCGSYKGGKRAMCTAKCARWYRGMYRRATGKAAMAYMYGSRWMMCTTTAACGATR 20220

Indonesia-88045 MGGCGSYKGGKRAMCTAKCARWYRGMYRRATGKAAMAYMYGSRWMMCTTTAACGATR 20220

Indonesia-88065 MGGCGSCGGGGRATMCKAKCARWYRGAARRGTGKMAMAYMYGSRWMMCTTTAACGATR 20220

. \* . . \* . \*\*\* . . \* \* . . .

Bhutan-09015 AAYTWAGSKYRRCWSYATATSRRGYYYAKYRAYMGCWATRRYATKAKACKCCACARR 20280

Bhutan-09024 AAYTWAGSKYRRCWSYATATSRRGYYYAKYRAYMGCWATRRYATKAKACKCCACARR 20280

Bhutan-09027 AAYTWAGSKYRRCWSYATATSRRGYYYAKYRAYMGCWATRRYATKAKACKCCACARR 20280

Bhutan-09030 AAYTWAGSKYRRCWSYATATSRRGYYYAKYRAYMGCWATRRYATKAKACKCCACARR 20280

Bhutan-09005 RWTKWRKSTCRYRSAGYRWYCGRRYTYRKYGTTMTYRTTWARTWCTMGTMMSYRYRRR 20280

Indonesia-88035 RWTKWRKSTCRYRSAGYRWYCGRRYTYRKYGTTMTYRTTWARTWCTMGTMMSYRYRRR 20280

Indonesia-88045 RWTKWRKSTCRYRSAGYRWYCGRRYTYRKYGTTMTYRTTWARTWCTMGTMMSYRYRRR 20280

Indonesia-88065 RWTKWRKSTCRYRSAGYRWYCGRRYTYRKYGTTMTYRTTWARTWCTMGTMMSYRYRRR 20280

. \* \* . \*\*\* . \* . \* \* \* \* : \* : \* . . . \*\*

Bhutan-09015 CTMAGGTRCAKWMGTGTTYWRYYSYCYRAYMCTGRSCKRTYRRARYTAWGRYMAKRTT 20340

Bhutan-09024 CTMAGGTRCAKWMGTGTTYWRYYSYCYRAYMCTGRSCKRTYRRARYTAWGRYMAKRTT 20340

Bhutan-09027 CTMAGGTRCAKWMGTGTTYWRYYSYCYRAYMCTGRSCKRTYRRARYTAWGRYMAKRTT 20340

Bhutan-09030 CTMAGGTRCAKWMGTGTTYWRYYSYCYRAYMCTGRSCKRTYRRARYTAWGRYMAKRTT 20340

Bhutan-09005 SYMRRWGGYMTWAYRYKYWCWRYYSYGRYMSYRGSTKRATAGRRYTYWARGCCWKRWW 20340

Indonesia-88035 SYMRRWGGYMTWAYRYKYWCARCCSSYGATCCTGGCTTRATAGGATTTAAGGCCAGGTT 20340

Indonesia-88045 SYMRRWGGYMTWAYRYKYWCARCCSSYGATCCTGGCTTRATAGGATTTAAGGCCAGGTT 20340

Indonesia-88065 SYMRRWGGYMTWAYRYKYWCWRYYSYGRYMSYRGSTKRATAGRRYTYWARGCCWKRWW 20340

. \* . \* \* . \* . \* . . . \* :

Bhutan-09015 AARTTYTCAMYCKCGRCRMYKWSRRKRYAARWRSATTYTRRMGMTYTRYGTRYAYCT 20400

Bhutan-09024 AARTTYTCAMYCKCGRCRMYKWSRRKRYAARWRSATTYTRRMGMTYTRYGTRYAYCT 20400

Bhutan-09027 AARTTYTCAMYCKCGRCRMYKWSRRKRYAARWRSATTYTRRMGMTYTRYGTRYAYCT 20400

Bhutan-09030 AARTTYTCAMYCKCGRCRMYKWSRRKRYAARWRSATTYTRRMGMTYTRYGTRYAYCT 20400

Bhutan-09005 TWRYWYTATRACMGMRAYGCTCGARGAATGTRGGAGSRCCCYARCKCYYYGYRKACRTMY 20400

Indonesia-88035 TWRYWYTATRACMGMRAYGCTCGARGAATGTRGRWRSRCCTYARCKCYYYGYRKACRTMY 20400

Indonesia-88045 TWRYWYTATFRACMGMRAYGCTCGARGAATGTRGRWRSRCCTYARCKCYYYGYRKACRTMY 20400  
Indonesia-88065 TWRYWYTATFRACMGMRAYGCTCGARGAATGTRGGAGSRCCCYARCKCYYYGYRKACRTMY 20400  
: \* \* : . \* . . \* \* \* .

Bhutan-09015 GRAKRASRGYTMAYRYWAGRRGTGTCASRRRYGKCTGYTTAGYTGMRWRWRTCATGRYTAR 20460  
Bhutan-09024 GRAKRASRGYTMAYRYWAGRRGTGTCASRRRYGKCTGYTTAGYTGMRWRWRTCATGRYTAR 20460  
Bhutan-09027 GRAKRASRGYTMAYRYWAGRRGTGTCASRRRYGKCTGYTTAGYTGMRWRWRTCATGRYTAR 20460  
Bhutan-09030 GRAKRASRGYTMAYRYWAGRRGTGTCASRRRYGKCTGYTTAGYTGMRWRWRTCATGRYTAR 20460  
Bhutan-09005 RARTRTCGSCYMWTTATWGAGAWRYRAGATRTAYKTYGGKTYRCACGAACYRKRGTTRR 20460  
Indonesia-88035 RARTRTCGSCYMWTTATWGAGAWRYRAGATGTCYKTYGGKTYRCACAAACYRKRGTTRR 20460  
Indonesia-88045 RARTRTCGSCYMWTTATWGAGAWRYRAGATGTCYKTYGGKTYRCACAAACYRKRGTTRR 20460  
Indonesia-88065 RARTRTCGSCYMWTTATWGAGAWRYRAGATRTAYKTYGGKTYRCACGAACYRKRGTTRR 20460  
.\*: . \* \*.. . . . . \*

Bhutan-09015 YKWGGAARYWYSTKMRKATMWCKWCRRGRWKRARGTSYYAYGYTRYTYAAATTACYCACA 20520  
Bhutan-09024 YKWGGAARYWYSTKMRKATMWCKWCRRGRWKRARGTSYYAYGYTRYTYAAATTACYCACA 20520  
Bhutan-09027 YKWGGAARYWYSTKMRKATMWCKWCRRGRWKRARGTSYYAYGYTRYTYAAATTACYCACA 20520  
Bhutan-09030 YKWGGAARYWYSTKMRKATMWCKWCRRGRWKRARGTSYYAYGYTRYTYAAATTACYCACA 20520  
Bhutan-09005 CTWRRWMACACGCGMRTGWCTCGWYRARRTGGCGGYCCTRYKTYWAYYYCRWMYCRYYYTYC 20520  
Indonesia-88035 CTWRRWMACACGCGMRTGWCTTTWYRARRTGGCGRYCCYRYGTWAYYYYAWATCACYCACM 20520  
Indonesia-88045 CTWRRWMACACGCGMRTGWCTTTWYRARRTGGCGRYCCYRYGTWAYYYYAWATCACYCACM 20520  
Indonesia-88065 CTWRRWMACACGCGMRTGWCTCGWYRARRTGGCGGYCCTRYKTYWAYYYCRWMYCRYYYTYC 20520  
.\* . \*\*.. \* \* \* . . \* \* \* :

Bhutan-09015 GGMGTTGSAWSASYKSSRYACCATCWGAAAWSGCMKMTTAAAGMSATYAGCRYKAMYCA 20580  
Bhutan-09024 GGMGTTGSAWSASYKSSRYACCATCWGAAAWSGCMKMTTAAAGMSAKYAGCRYKAMYCA 20580  
Bhutan-09027 GGMGTTGSAWSASYKSSRYACCATCWGAAAWSGCMKMTTAAAGMSATYAGCRYKAMYCA 20580  
Bhutan-09030 GGMGTTGSAWSASYKSSRYACCATCWGAAAWSGCMKMTTAAAGMSATYAGCRYKAMYCA 20580  
Bhutan-09005 KCARCYRCRTCRGTTGSCACGYRYCYRRRRWSRMCGATCCMRRASRGTCRYACGAACMA 20580  
Indonesia-88035 GGARCYRCRTCRGTTGSCACGYRYCYRRRRWSRMCGATCCMRRASRGTCRYACGMACMR 20580  
Indonesia-88045 GSARCYRCRTCRGTTGSCACGYRYCYRRRRWSRMCGATCCMRRASRGTCRYACGMACMR 20580  
Indonesia-88065 KCARCYRCRTCRGTTGSCACGYRYCYRRRRWSRMCGATCCMRRASRGTCRYACGAACMA 20580  
. . . \* . : \*\* \* .

Bhutan-09015 CTMKWCAGTCGCRATYCMWRCRATTRMTYRSYYMRKMRWYCKAYGWGRTCWATTYASWAR 20640  
Bhutan-09024 CTMKWCAGTCGCRATYCMWRCRATTRMTYRSYYMRKMRWYCKAYGWGRTCWATTYASWAR 20640  
Bhutan-09027 CTMKWCAGTCGCRATYCMWRCRATTRMTYRSYYMRKMRWYCKAYGWGRTCWATTYASWAR 20640  
Bhutan-09030 CTMKWCAGTCGCRATYCMWRCRATTRMTYRSYYMRKMRWYCKAYGWGRTCWATTYASWAR 20640  
Bhutan-09005 CTMKTMMKYTRSARCYCWRMRMCWRCWTRCYCCRTMAWYRRTYRWSRYGTATCCMGTMG 20640  
Indonesia-88035 MWCTTMMKTCRSARCYCWRMRMCWRCWTRCYCCRTMAWYRRTYRWSRYGTATCCMGTMG 20640  
Indonesia-88045 MWCTTMMKTCRSARCYCWRMRMCWRCWTRCYCCRTMAWYRRTYRWSRYGTATCCMGTMG 20640  
Indonesia-88065 CTMKTMMKYTRSARCYCWRMRMCWRCWTRCYCCRTMAWYRRTYRWSRYGTATCCMGTMG 20640  
. . \* \* \* \* . \* \* \* \* : \* \* . . .

Bhutan-09015 RMYACWRKAYSIMAYRKRYGTYGYRYACGCTTKYMGMTYYGCSAYWYARCARKRYWTAT 20700  
Bhutan-09024 RMYACWRKAYSIMAYRKRYGTYGYRYACGCTTKYMGMTYYGCSAYWYARCARKRYWTAT 20700  
Bhutan-09027 RMYACWRKAYSIMAYRKRYGTYGYRYACGCTTKYMGMTYYGCSAYWYARCARKRYWTAT 20700  
Bhutan-09030 RMYACWRKAYSIMAYRKRYGTYGYRYACGCTTKYMGMTYYGCSAYWYARCARKRYWTAT 20700  
Bhutan-09005 RMYRYARKRTCTMRTAGAYRYTCRCGTRTRTWCKYCAACCTTTGGYWYWRWAGTRTWYRK 20700  
Indonesia-88035 RCYRYARKRTCTMRTAGAYRYTCRCGTRTRTWCKYCAACCTTTGGYWYWRWAGTRTWYRK 20700  
Indonesia-88045 RCYRYARKRTCTMRTAGAYRYTCRCGTRTRTWCKYCAACCTTTGGYWYWRWAGTRTWYRK 20700  
Indonesia-88065 RMYRYARKRTCTMRTAGAYRYTCRCGTRTRTWCKYCAACCTTTGGYWYWRWAGTRTWYRK 20700  
\* \* \*\* . \* \* \*\* . . . \* \* .

Bhutan-09015 WAKGYWRTCAWAGRRYCYCKMTCYCRSWGMRCKCRYSGTWRTYWTAARRWRMTRKGGAA 20760  
 Bhutan-09024 WAKGYWRTCAWAGRRYCYCKMTCYCRSWGMRCKCRYSGTWRTYWTAARRWRMTRKGGAA 20760  
 Bhutan-09027 WRKGYWRTCAWAGRRYCYCKMTCYCRSWGMRCKCRYSGTWRTYWTAARRWRMTRKGGAA 20760  
 Bhutan-09030 WAKGYWRTCAWAGRRYCYCKMTCYCRSWGMRCKCRYSGTWRTYWTAARRWRMTRKGGAA 20760  
 Bhutan-09005 TKGCTTRWYMTARCRCYMCGGCYTYRGAKMRYTTRYSMRAWRCYWYRRGRWRMGRGRSRW 20760  
 Indonesia-88035 TTGCTTRWYMTARCRCYMCGGCYTYRGAKMRYTTRYSMRATACYWYRRGRWRMGRGRSRW 20760  
 Indonesia-88045 TTGCTTRWYMTARCRCYMCGGCYTYRGAKMRYTTRYSMRATACYWYRRGRWRMGRGRSRW 20760  
 Indonesia-88065 TTGCTTRWYMTARCRCYMCGGCYTYRGAKMRYTTRYSMRAWRCYWYRRGRWRMGRGRSRW 20760

\* \* \* . \* . \*\*\* : \*\* \*\*\*\* \* .

Bhutan-09015 ARCTRTRYWTAWKMRTAYRRGYMYGTIAYRGATATCGWKRYGYWYTCRWWGCKGKSWTYA 20820  
 Bhutan-09024 ARCTRTRYWTAWKMRTAYRRGYMYGTIAYRGATATCGWKRYGYWYTCRWWGCKGKSWTYA 20820  
 Bhutan-09027 ARCTRTRYWTAWKMRTAYRRGYMYGTIAYRGATATCGWKRYGYWYTCRWWGCKGKSWTYA 20820  
 Bhutan-09030 ARCTRTRYWTAWKMRTAYRRGYMYGTIAYRGATATCGWKRYGYWYTCRWWGCKGKSWTYA 20820  
 Bhutan-09005 RGYRWGTAGGWKARYMTARSTMYRWTATAGCRAFRARRTYRCWCCYATTKYKKSAGCW 20820  
 Indonesia-88035 RGCYAWGTAGGWKARYMTARSTMYRWTATAGCRAFRARRTYRCWCCYATTKYKKSAGCW 20820  
 Indonesia-88045 RGCYAWGTAGGWKARYMTARSTMYRWTATAGCRAFRARRTYRCWCCYATTKYKKSAGCW 20820  
 Indonesia-88065 RGYRWGTAGGWKARYMTARSTMYRWTATAGCRAFRARRTYRCWCCYATTKYKKSAGCW 20820

. \*\* \* \* . \* : : \* \* \* \* \*

Bhutan-09015 GCWTGAAWYCRWTGTYMRYYSKCMCMGKYAGCYCMAGCYGCKTWACWYKMTTTRCCMSYY 20880  
 Bhutan-09024 GCWTGAAWYCRWTGTYMRYYSKCMCMGKYAGCYCMAGCYGCKTWACWYKMTTTRCCMSYY 20880  
 Bhutan-09027 GCWTGAAWYCRWTGTYMRYYSKCMCMGKYAGCYCMAGCYGCKTWACWYKMTTTRCCMSYY 20880  
 Bhutan-09030 GCWTGAAWYCRWTGTYMRYYSKCMCMGKYAGCYCMAGCYGCKTWACWYKMTTTRCCMSYY 20880  
 Bhutan-09005 AMAARCTWYYGAWRGTMGYTCYCACSKYARTTTMMGSTS YGYWMSATTAKYATATYAGCT 20880  
 Indonesia-88035 ACAARCTWYYGAWRGTMGYTCYCACSKYARTTTMMGSTS YGYWMSATTAKYATATYAGCT 20880  
 Indonesia-88045 ACAARCTWYYGAWRGTMGYTCYCACSKYARTTTMMGSTS YGYWMSATTAKYATATYAGCT 20880  
 Indonesia-88065 AMAARCTWYYGAWRGTMGYTCYCACSKYARTTTMMGSTS YGYWMSATTAKYATATYAGCT 20880

. : . : \*\* \* \* . . . \*\* \* . . \* . . . :

Bhutan-09015 TRWYCTRYRSYACGYCYRRRAYTRGWGCGGAGGSMYRASSRTYTARCA YCKRATAYG 20940  
 Bhutan-09024 TRWYCTRYRSYACGYCYRRRAYTRGWGCGGAGGSMYRASSRTYTARCA YCKRATAYG 20940  
 Bhutan-09027 TRWYCTRYRSYACGYCYRRRAYTRGWGCGGAGGSMYRASSRTYTARCA YCKRATRYG 20940  
 Bhutan-09030 TRWYCTRYRSYACGYCYRRRAYTRGWGCGGAGGSMYRASSRTYTARCA YCKRATAYG 20940  
 Bhutan-09005 KRTCYGATYASTGTACTTARAMCAARTAMKRTGKKRMYAGCCRYYYRASGTSSTGWWGCA 20940  
 Indonesia-88035 KRTCYGATYASTGTACTTARAMCAAGTAMKRTGKKRMYAACCCRYYYRASGTSSTGWWGCA 20940  
 Indonesia-88045 KRTCYGATYASTGTACTTARAMCAARTAMKRTGKKRMYAACCCRYYYRASGTSSTGWWGCA 20940  
 Indonesia-88065 KRTCYGATYASTGTACTTARAMCAARTAMKRTGKKRMYAGCCRYYYRASGTSSTGWWGCA 20940

. \* \* \* . \* : . . \* . . . \* \* . . . .

Bhutan-09015 WTYTTTWTGTCASMGYTRMYTYTYRGWRYRASGTRKYGGRRCCSMAYWY YCMCCARAY 21000  
 Bhutan-09024 WTYTTTWTGTCASMGYTRMYTYTYRGWRYRASGTRKYGGRRCCSMAYWY YCMCCARAY 21000  
 Bhutan-09027 WTYTTTWTGTCASMGYTRMYTYTYRGWRYRASGTRKYGGRRCCSMAYWY YCMCCARAY 21000  
 Bhutan-09030 WTYTTTWTGTCASMGYTRMYTYTYRGWRYRASGTRKYGGRRCCSMAYWY YCMCCARAY 21000  
 Bhutan-09005 TKTWYCTRCYRCAAYYCRMWCCYCAATACARCRARKYSRRRYSMGTACTY YMYGRRY 21000  
 Indonesia-88035 TKTWYCTRCYRCAAYYCRMWCCYCAATACARCRARKYSRRRYSMGTACTY YMYGRRY 21000  
 Indonesia-88045 TKTWYCTRCYRCAAYYCRMWCCYCAATACARCRARKYSRRRYSMGTACTY YMYGRRY 21000  
 Indonesia-88065 TKTWYCTRCYRCAAYYCRMWCCYCAATACARCRARKYSRRRYSMGTACTY YMYGRRY 21000

. . . \* \* . : \*\* . \*\* . \*\* . \* \* . \* \*

Bhutan-09015 YSRCYYGTGARYGKCRYRKAATRYMKGAYKKAAGRMMARYAGSKRTMSGAC YYRRGYRR 21060  
 Bhutan-09024 YSRCYYGTGARYGKCRYRKAATRYMKGAYKKAAGRMMARYAGSKRTMSGAC YYRRGYRR 21060  
 Bhutan-09027 YSRCYYGTGARYGKCRYRKAATRYMKGAYKKAAGRMMARYAGSKRTMSGAC YYRRGYRR 21060  
 Bhutan-09030 YSRCYYGTGARYGKCRYRKAATRYMKGAYKKAAGRMMARYAGSKRTMSGAC YYRRGYRR 21060



```

* . * ..*.* : .* ** * ..* .* . . **

Bhutan-09015 YMTYYMCAYMKSYYCYKGTWYSYCM TAYGCAKWKWKGTAYTTT RAWTRGRRRYTARTSRR 21420
Bhutan-09024 YMTYYMCAYMKSYYCYKGTWYSYCM TAYGCAKWKWKGTAYTTT RAWTRGRRRYTARTSRR 21420
Bhutan-09027 YMTYYMCAYMKSYYCYKGTWYSYCM TAYGCAKWKWKGTAYTTT RAWTRGRRRYTARTSRR 21420
Bhutan-09030 YMTYYMCAYMKSYYCYKGTWYSYCM TAYGCAKWKWKGTAYTTT RAWTRGRRRYTARTSRR 21420
Bhutan-09005 CCKYYMYRCKKSCYSCTKYWTCYMYTYRARTWGATA CRTTWWGAWRRRAGYR RYSRA 21420
Indonesia-88035 CCKYYMYRCKKSCYSCTKYWTCYMYTYRARTWGATA CRTTWWGAWRRRAGYR RYSRA 21420
Indonesia-88045 CMKYTMYRCKKSCYSCTKYWTCYMYTYRARTWGATA CRTTWWGAWRRRAGYR RYSRA 21420
Indonesia-88065 CMKYTMYRCKKSCYSCTKYWTCYMYTYRARTWGATA CRTTWWGAWRRRAGYR RYSRA 21420
.* * ** * . * . * * : * . * . . * * * * *

Bhutan-09015 ATCMGRAGYARYMRATTWTATTAAYRRKRACGGCRAKKTCTYYAKTCGYWRMWARTYY 21480
Bhutan-09024 ATCMGRAGYARYMRATTWTATTAAYRRKRACGGCRAKKTCTYYAKTCGYWRMWARTYY 21480
Bhutan-09027 ATCMGRAGYARYMRATTWTATTAAYAGTRACGGCRAKKTCTYYAKTCGYWRMWARTYY 21480
Bhutan-09030 ATCMGRAGYARYMRATTWTATTAAYRRKRACGGCRAKKTCTYYAKTCGYWRMWARTYY 21480
Bhutan-09005 WYACARRRWTATCGGCWAKRCCTAYAGWARRCGGYRRKKGAGCTGTYSRCYWRMWRGTY 21480
Indonesia-88035 WYACARRRWTATCGGCWAKRCCTAYAGWARRCGGYRRKKGAGCTGTYSRCYWRMWRGTY 21480
Indonesia-88045 WYACARRRWTATCGGCWAKRCCTAYAGWARRCGGYRRKKGAGCTGTYSRCYWRMWRGTY 21480
Indonesia-88065 WYACARRRWTATCGGCWAKRCCTAYAGWARRCGGYRRKKGAGCTGTYSRCYWRMWRGTY 21480
. . . . : * . * * . . . * * * *

Bhutan-09015 RRTYWCCTCWYRMWKCYAGYYRTASRTKWCAAYYYRYWRAWRRKMWAKYGSTRWKCKK 21540
Bhutan-09024 RRTYWCCTCWYRMWKCYAGYYRTASRTKWCAAYYYRYWRAWRRKMWAKYGSTGTCKK 21540
Bhutan-09027 RRTYWCCTCWYRMWKCYAGYYRTASRTKWCAAYYYRYWRAWRRKMWAKYGSTRWKCKK 21540
Bhutan-09030 RRTYWCCTCWYRMWKCYAGYYRTASRTKWCAAYYYRYWRAWRRKMWAKYGSTRWKCKK 21540
Bhutan-09005 ARYTASYMTTGMTKGYRKYCRYRGAYGWSWGCCYRCAAGAGRKMTCYAGAGWTS GK 21540
Indonesia-88035 ARYTASYMTTGMTKGYRKYCRYRGAYGWSWGCCYRCAAGAGRKMTCYAGAGWTS GK 21540
Indonesia-88045 ARYTASYMTTGMTKGYRKYCRYRGAYGWSWGCCYRCAAGAGRKMTCYAGAGWTS GK 21540
Indonesia-88065 ARYTASYMTTGMTKGYRKYCRYRGAYGWSWGCCYRCAAGAGRKMTCYAGAGWTS GK 21540
* . * * * * . * . ** . *** ..*..: . . *

Bhutan-09015 GKTSGSMATWGGWTRTGATMSWGWACASWTAAYGTMTRTCWCYRTYAGYRSGTYATRRG 21600
Bhutan-09024 GKTSGSMATWGGWTRTGATMSWGWACASWTAAYGTMTRTCWCYRTYAGYRSGTYATRRG 21600
Bhutan-09027 GKTSGSMATWGGWTRTGATMSWGWACASWTAAYGTMTRTCWCYRTYAGYRSGTYATRRG 21600
Bhutan-09030 GKTSGSMATWGGWTRTGATMSWGWACASWTAAYGTMTRTCWCYRTYAGYRSGTYATRRG 21600
Bhutan-09005 TKWSRGARWTRRWGKTKRCCACTATACTGAGMTRYMYRYTATGYARCSGKACRGR 21600
Indonesia-88035 TKWSRGARWTRRWGKTKRCCACTATACTGAGMTRYMYRYTATGYTRRCAGRGYR RRR 21600
Indonesia-88045 TKWSRGARWTRRWGKTKRCCACTATACTGAGMTRYMYRYTATGYTRRCAGRGYR RRR 21600
Indonesia-88065 TKWSRGARWTRRWGKTKRCCACTATACTGAGMTRYMYRYTATGYARCSGKACRGR 21600
* * . * . . : . * * . . *

Bhutan-09015 RGRAMRRCAMWCYRMWRSTTRTKTYMGCCAAACYCSYKTCYGKRTATKGAATRYYYRAG 21660
Bhutan-09024 RGRAMRRCAMWCYRMWRSTTRTKTYMGCCAAACYCSYKTCYGKRTATKGAATRYYYRAG 21660
Bhutan-09027 RGRAMRRCAMWCYRMWRSTTRTKTYMGCCAAACYCSYKTCYGKRTATKGAATRYYYRAG 21660
Bhutan-09030 RGRAMRRCAMWCYRMWRSTTRTKTYMGCCAAACYCSYKTCYGKRTATKGAATRYYYRAG 21660
Bhutan-09005 RRGCAASMAAARTAMTRGGYGKGCATCWWMSTCTTYMTRGRWWWTRRWYRCCCRGR 21660
Indonesia-88035 RRGCAASMAAARTAMTRGGYGKGCATCWWMSTCTTYMTRGRWWWTRRWYRCCCRGR 21660
Indonesia-88045 RRGCAASMAAARTAMTRGGYGKGCATCWWMSTCTTYMTRGRWWWTRRWYRCCCRGR 21660
Indonesia-88065 RRGCAASMAAARTAMTRGGYGKGCATCWWMSTCTTYMTRGRWWWTRRWYRCCCRGR 21660
* . * * . . . . . * . * *

Bhutan-09015 CTARTYCGTRKGMRAYGYGTRMGYSRTGYCAGKTCYWWSYTGTA YMAYWCATCRCYCYAR 21720
Bhutan-09024 CTARTYCGTRKGMRAYGYGTRMGYSRTGYCAGKTCYWWSYTGTA YMAYWCATCRCYCYAR 21720

```



Bhutan-09027 CTARTYCGTRKGMRAYGYGTRMGYSRTGYCAGKTCYWWSYTGTAYMAYWCATCRCYCYAR 21720  
 Bhutan-09030 CTARTYCGTRKGMRAYGYGTRMGYSRTGYCAGKTCYWWSYTGTAYMAYWCATCRCYCYAR 21720  
 Bhutan-09005 YCRRYCYCAATSCARTGCKCRMCSYAASCTGKKKMTAASYCTCWCSTRYMMWKYGTCTYTRG 21720  
 Indonesia-88035 YCRRYCYCAATSCARTSCKCRMCSYAASCTGKKKMTAASYCTCWCSTRYMMWKYGTCTYTRG 21720  
 Indonesia-88045 YCRRYCYCAATSCARTSCKCRMCSYAASCTGKKKMTAASYCTCWCSTRYMMWKYGTCTYTRG 21720  
 Indonesia-88065 YCRRYCYCAATSCARTGCKCRMCSYAASCTGKKKCTAASYCTCWCSTRYMMWKYGTCTYTRG 21720  
 \* : .. . \*\* \*\* :. . \* . \*\* \*\* .

Bhutan-09015 GCGWRTYRGRYYYYRSGSRYACCTRYMSRWRYGTWAWYRSKYWCYCRNSTAYYMAWAWC 21780  
 Bhutan-09024 GCGWRTYRGRYYYYRSGSRYACCTRYMSRWRYGTWAWYRSKYWCYCRNSTAYYMAWAWC 21780  
 Bhutan-09027 GCGWRTYRGRYYYYRSGSRYACCTRYMSRWRYGTWAWYRSKYWCYCRNSTAYYMAWAWC 21780  
 Bhutan-09030 GCGWRTYRGRYYYYRSGSRYACCTRYMSRWRYGTWAWYAGKYWCYCRNSTAYYMAWAWC 21780  
 Bhutan-09005 CYKAAWTAARTCTGSKSAYTRMMWGCMTGTYTTATRWYGGCTWYCGACAACTCTAAAT 21780  
 Indonesia-88035 CTGAAWTAARTCTGSKSAYTRCCAGYMCMTGTYTTATRWYGGCTWYCGACTMYCAWMAY 21780  
 Indonesia-88045 CTGAAWTAARTCTGSKSAYTRCCAGYMCMTGTYTTATRWYGGCTWYCGACTMYCAWMAY 21780  
 Indonesia-88065 CYKAAWTAARTCTGSKSAYTRMMWGCMTGTYTTATRWYGGCTATCAGACWAYCWWMAT 21780  
 . \* \* \* \* . \* : \* . . .

Bhutan-09015 RRKWRCMACRRCYTMRTMYWCKGCRTAGRTSKWCTRCWARAASYRRRYAWCYCRRKK 21840  
 Bhutan-09024 RRKWRCMACRRCYTMRTMYWCKGCRTAGRTSKWCTRCWARAASYRRRYAWCYCRRKK 21840  
 Bhutan-09027 RRKWRCMACRRCYTMRTMYWCKGCRTAGRTSKWCTRCWARAASYRRRYAWCYCRRKK 21840  
 Bhutan-09030 RRKWRCMACRRCYTMRTMYWCKGCRTAGRTSKWCTRCWARAASYRRRYAWCYCRRKK 21840  
 Bhutan-09005 GGGAAASMRMRAMYWWMRYCTTAYTRSAWARACCKTYKAYWTGRWSYCRACRAYMAAGK 21840  
 Indonesia-88035 GGGAAASMRMRAMYWWMRYCTTAYTRSAWARACCKTYKAYWTGRWSYCRACRAYMAAGK 21840  
 Indonesia-88045 GGGAAASMRMRAMYWWMRYCTTAYTRSAWARACCKTYKAYWTGRWSYCRACRAYMAAGK 21840  
 Indonesia-88065 GGGAAASMRMRAMYWWMRYCTTAYTRSAWARACCKTYKAYATGGTSYCRACRAYMAAGK 21840  
 . \* \* \* \* . . . \* . : \* \* \* \* \*

Bhutan-09015 KCYGGRRARRCRGRWSTYRSYATCAATAWTRYRYRYRGRWARGMRGYCCGMSGAATRRYA 21900  
 Bhutan-09024 KCYGGRRARRCRGRWSTYRSYATCAATAWTRYRYRYRGRWARGMRGYCCGMSGAATRRYA 21900  
 Bhutan-09027 KCYGGRRARRCRGRWSTYRSYATCARYAWTRYRYRYRGRWARGMRGYCCGMSGAATRRYA 21900  
 Bhutan-09030 KCYGGRRARRCRGRWSTYRSYATCARYAWTRYRYRYRGRWARGMRGYCCGMSGAATRRYA 21900  
 Bhutan-09005 TYCARTRRGGYARGTG YCRCTRCSWRTRAYAMCAYGTGSWGARCAAYTYMCKWRYAAYR 21900  
 Indonesia-88035 TYCARTRRGGYARGTG YCRCTRCSWRTRAYAMCAYGTGSWGARCAAYTYMCTWRYYAAYR 21900  
 Indonesia-88045 TYCAARTRRGGYARGTG YCRCTRCSWRTRAYAMCAYGTGSWGARCAAYTYMCTWRYYAAYR 21900  
 Indonesia-88065 TTCAARTRRGGYARGTG YCRCTRCSWRTRAYAMCAYGTGSWGAACAAYTYMCTWRYYAAYR 21900  
 . . \* . \* . . \* . \* . \* . \*

Bhutan-09015 WTYARYCKCCCWGYGYRYWCKTAYYGSYRYYMTYGWYTTGGRCCAMRGYRRKKKRC 21960  
 Bhutan-09024 WTYARYCKCCCWGYGYRYWCKTAYYGSYRYYMTYGWYTTGGRCCAMRGYRRKKKRC 21960  
 Bhutan-09027 WTYARYCKCCCWGYGYRYWCKTAYYGSYRYYMTYGWYTTGGRCCAMRGYRRKKKRC 21960  
 Bhutan-09030 WTYARYCKCCCWGYGYRYWCKTAYYGSYRYYMTYGWYTTGGRCCAMRGYRRKKKRC 21960  
 Bhutan-09005 AYYTRTTKYTYKTCRYAYYAAGGCCRSKTGRCYCYSTCYKKRMYRMGRTGAKTGGM 21960  
 Indonesia-88035 AYYTRTTKYTYKTCRYAYYAAGGCCRSKTGRCYCYSTCYKKRMYRMGRTGAKTGGM 21960  
 Indonesia-88045 AYYTRTTKYTYKTCRCCAYYAAGGCCRSKTGRCYCYSTCYKKRMYRMGRTGAKTGGM 21960  
 Indonesia-88065 AYYTRTTKYTYKTCRYAYYAAGGCCRSKTGRCYCYSTCYKKRMYRMGRTGAKTGGM 21960  
 \* : \* \* . . \* \* \* . \* \* \* .

Bhutan-09015 AYCWWGTMYGRYRGWKYTYRAYRRRCARMSMRTKARMRGYATARATATRGARCAAYRMWR 22020  
 Bhutan-09024 AYCWWGTMCGRYRGWKYTYRAYRRRCARMSMRTKARMRGYATARATATRGARCAAYRMWR 22020  
 Bhutan-09027 AYCWWGTMYGRYRGWKYTYRAYRRRCARMSMRTKARMRGYATARATATRGARCAAYRMWR 22020  
 Bhutan-09030 AYCWWGTMYGRYRGWKYTYRAYRRRCARMSMRTKARMRGYATARATATRGARCAAYRMWR 22020  
 Bhutan-09005 RYSAKRCCCKACARWTYWCARTRRMRAACMMGWGTRCGRCMYRRGGWRAMGYMTYRMTG 22020  
 Indonesia-88035 RYSAKRCCCKACARWTYWCARTRRMRAACMMGTGTRCGRCMYRRGGWRAGYMTYRMTG 22020

Indonesia-88045 RYSAKRCCCKACARWTYWCARTRRMRAACMMGTGTRCGRCMYRRGGGWRAAGYMTYRMTG 22020  
Indonesia-88065 RYSAKRCCCTACARWTYWCARTRRMRAACMMGWGTRCGRCMYRRGGGWRAMGYMTYRMTG 22020  
\* . \* . \* \* . \* \* : \* \* . . \* . \* \* \*  
Bhutan-09015 WYYRAAYRTSAKYYYYATKRYKYWMRAAWYYGAMTKRAATGCKWWRWYKYGYTYGTYSGK 22080  
Bhutan-09024 WYYRAAYRTSAKYYYYATKRYKYWMRAAWYYGAMTKRAATGCKWWRWYKYGYTYGTYSGK 22080  
Bhutan-09027 WYYRAAYRTSAKYYYYATKRYKYWMRAAWYYGAMTKRAATGCKWWRWYKYGYTYGTYSGK 22080  
Bhutan-09030 WYYRAAYRTSAKYYYYATKRYKYWMRAAWYYGAMTKRAATGCKWWRWYKYGYTYGTYSGK 22080  
Bhutan-09005 WTCATWTGYSRGCCYYRYGATKYTMRRCATYCSRAYGRWGCKAGTAATCTTKYTRAMCKR 22080  
Indonesia-88035 WTCATWTGYSRGCCYYRYGATKYTMRRCATYCSRAYGRWGCKAGTAATCTTKYTRAMCKR 22080  
Indonesia-88045 WTCATWTGYSRGCCYYRYGATKYTMRRCATYCSRAYGRWGCKAGTAATCTTKYTRAMCKR 22080  
Indonesia-88065 WTCATWTGYSRGCCYYRYGATKYTMRRCATYCSRAYGRWGCKAGTAATCTTKYTRAMCKR 22080  
\* : \* \* \* \* \* . \* . \* . . : . \*  
Bhutan-09015 TYCYWAYKRKTTAACRRGRTRRRYRSMCRTMGYTRTYYYCCYTCKCYRGMKTTTRATTY 22140  
Bhutan-09024 TYCYWAYKRKTTAACRRGRTRRRYRSMCRTMGYTRTYYYCCYTCKCYRGMKTTTRATTY 22140  
Bhutan-09027 TYCYWAYKRKTTAACRRGRTRRRYRSMCRTMGYTRTYYYCCYTCKCYRGMKTTTRATTY 22140  
Bhutan-09030 TYCYWAYKRKTTAACRRGRTRRRYRSMCRTMGYTRTYYYCCYTCKCYRGMKTTTRATTY 22140  
Bhutan-09005 YCCYMWYTGWWMRGRRYYRATYASMCATMKCTGYTYCGTYWYGYTRRCGAKGKAWWT 22140  
Indonesia-88035 YCCYMWYTGWWMRGRRYYRATYASMCATMKCTGYTYCGTYWYGYTRRCGAKGKRTWT 22140  
Indonesia-88045 YCCYMWYTGWWMRGRRYYRATYASMCATMKCTGYTYCGTYWYGYTRRCGAKGKRTWT 22140  
Indonesia-88065 YCCYMWYTGWWMRGRRYYRATYASMCATMKCTGYTYCGTYWYGYTRRCGAKGKAWWT 22140  
\* \* . \* \* \* \* \* \* \* \* \* \* : . .  
Bhutan-09015 MWYTARWSRKCTWKYCAIRYKYWAGAYMMAAYTYKGRYWRYYRYSYWYKWRMRKRMYT 22200  
Bhutan-09024 MWYTARWSRKCTWKYCAIRYKYWAGAYMMAAYTYKGRYWRYYRYSYWYKWRMRKRMYT 22200  
Bhutan-09027 MWYTARWSRKCTWKYCAIRYKYWAGAYMMAAYTYKGRYWRYYRYSYWYKWRMRKRMYT 22200  
Bhutan-09030 MWYTARWSRKCTWKYCAIRYKYWAGAYMMAAYTYKGRYWRYYRYSYWYKWRMRKRMYT 22200  
Bhutan-09005 AWYWMATSAGYATKYSRYRTKYTTMGTAAYMARCCCGRGTTRCGGCCYTKAAAAATAMYW 22200  
Indonesia-88035 AWYWMATSAGYATKYSRYRTKYTTMGTAAYMARCCCGRGTTRCGGCCYTKAAAAATAMYW 22200  
Indonesia-88045 AWYWMATSAGYATKYSRYRTKYTTMGTAAYMARCCCGRGTTRCGGCCYTKAAAAATAMYW 22200  
Indonesia-88065 AWYWMATSAGYATKYSRYRTKYTTMGTAAYMARCCCGRGTTRYGGCCYTKAAAAATAMYW 22200  
\* \* \* : \* \* . \* \* \* \* \* \* \* \* \* \* \* \* \* \* \* \* \*  
Bhutan-09015 RCCYSYYYSGTCMRYGGRYKMKCKRCRMRTWYCYRKYKCYGMRAATGKGACYWCRGWACW 22260  
Bhutan-09024 RCCYSYYYSGTCAYGGRYKMKCKRCRMRTWYCYRKYKCYGMRAATGKGACYWCRGWACW 22260  
Bhutan-09027 RCCYSYYYSGTCMRYGGRYKMKCKRCRMRTWYCYRKYKCCGMRAATGKGACYWCRGWACW 22260  
Bhutan-09030 RCCYSYYYSGTCMRYGGRYKMKCKRCRMRTWYCYRKYKCCGMRAATGKGACYWCRGWACW 22260  
Bhutan-09005 ATTTCCCCCKCGMRTKCRGTGTCATGYAARWTCSTATYGYTACARRYKTAGTYWYRRKGTW 22260  
Indonesia-88035 AYTCCCCCKCGCATKCRGTGTCATGYAARWTCSTAWYGYTACARRYKTAGTYWYRRKGTW 22260  
Indonesia-88045 AYTCCCCCKCGCATKCRGTGTCATGYAARWTCSTAWYGYTACARRYKTAGTYWYRRKGTW 22260  
Indonesia-88065 AYTCCCCCKCGMRTKCRGTGTCATGYAARWTCSTATYGYTACARRYKTAGTYWYRRKGTW 22260  
. . \* . . \* . \* . . . \* \* \* . \*  
Bhutan-09015 RRCRRTTYKGYTMCTYYASCKRKYGCSMTGCKRYRYCTRAWWARAGKAGTWGGGGGYCWA 22320  
Bhutan-09024 RRCRRTTYKGYTMCTYYASCKRKYGCSMTGCKRYRYCTRAWWARAGKAGTWGGGGGYCWA 22320  
Bhutan-09027 RRCRRTTYKGYTMCTYYASCKRKYGCSCTGCKRYRYCTRAWWARAGKAGTWGGGGGYCWA 22320  
Bhutan-09030 RRCRRTTYKGYTMCTYYASCKRKYGCSMTGCKRYRYCTRAWWARAGKAGTWGGGGGYCWA 22320  
Bhutan-09005 RGTARGGYGKTGKAKTYRGTGGKYCTACRYKRTGYYYYRGAACARGTRGWCAAAKYCWM 22320  
Indonesia-88035 RGTARGGYGKTGMAKTYRGTGGKYCTACRYKRTGYYYYRGAACARGWRGWCAAAATYCWC 22320  
Indonesia-88045 RGTARGGYGKTGMAKTYRGTGGKYCTACATKRTGYYYYRGAACARGWRGWCAAAATYCWC 22320  
Indonesia-88065 RGTARGGYGKTGKAKTYRGTGGKYCTACRYKRTGYYYYRGAACARGTRGWCAAAKYMWM 22320  
\* \* \* . . \* . \* \* . \* \* \* \* . \* . . \* \* \* \* \*

|                 |                                                               |       |
|-----------------|---------------------------------------------------------------|-------|
| Bhutan-09015    | YKSWTAYRRCMAMAYWYMRKMGCKKRGWRRYCCYKWGRKKTRRACRYRKATAYYYARASR  | 22380 |
| Bhutan-09024    | YKSWTAYRRCMAMAYWYMRKMGCKKRGWRRYCCYKWGRKKTRRACRYRKATAYYYARASR  | 22380 |
| Bhutan-09027    | YKSWTAYRRCMAMAYWYMRKMGCKKRGWRRYCCYKWGRKKTRRACRYRKATAYYYARASR  | 22380 |
| Bhutan-09030    | YKSWTAYRRCMAMAYWYMRKMGCKKRGWRRYCCYKWGRKKTRRACRYRKATAYYYARASR  | 22380 |
| Bhutan-09005    | TGCWWAYARYATARCWCMGKMSKTRCWGATYYYGAGATGYARRMRYGTRARTTTMGGSR   | 22380 |
| Indonesia-88035 | TGCTWRYARYAAARCWCMGKMSKTRCWGATYYYGAGATGYARRMRYGTRARTTTMGGSR   | 22380 |
| Indonesia-88045 | TGCTWRYARYAAARCWCMGKMSKTRCWGATYYYGAGATGYARRMRYGTRARTTTMGGSR   | 22380 |
| Indonesia-88065 | TGCWWAYARYATARCWCMGKMSKTRCWGATYYYGAGATGYARRMRYGTRARTTTMGGSR   | 22380 |
|                 | . * * : * * * . * * * . * * * . : . **                        |       |
| Bhutan-09015    | YYCGGTWAACGTMACTTATAGARYCTRGRMRYAMYRYYYTGWKYTRSWYYGCARAKKRG   | 22440 |
| Bhutan-09024    | YYCGGTWAACGTMACTTATAGARYCTRGRMRYAMYRYYYTGWKYTRSWYYGCARAKKRG   | 22440 |
| Bhutan-09027    | YYCGGTWAACGTMACTTATAGARYCTRGRMRYAMYRYYYTGWKYTRSWYYGCARAKKRG   | 22440 |
| Bhutan-09030    | YYCGGTWAACGTMACTTATAGARYCTRGRMRYAMYRYYYTGWKYTRSWYYGCARAKKRG   | 22440 |
| Bhutan-09005    | YYYKRRARWTATCRTKCGGTAMRTSWGRGMACGCCAYCYRWGCKACWCYRYMRWGGKRR   | 22440 |
| Indonesia-88035 | YYYKRRARWTATCRTKCGGTAMRTSWGRGMACGCCAYCYRWGCKACWCYRYMRWGGKRR   | 22440 |
| Indonesia-88045 | YYYKRRARWTATCRTKCGGTAMRTSWGRGMACGCCAYCYRWGCKACWCYRYMRWGGKRR   | 22440 |
| Indonesia-88065 | YYYKRRARWTATCRTKCGGTAMRTSWGRGMACGCCAYCYRWGCKACWCYRYMRWGGKRR   | 22440 |
|                 | ** . . . : . * . * * . * * * * **                             |       |
| Bhutan-09015    | AGYYMSKKYYCGTTGTRKTMMMTGMRARKAGATGATGWRTAYSWMYSGGRCKTGKTRRA   | 22500 |
| Bhutan-09024    | AGYYMSKKYYCGTTGTRKTMMMTGMRARKAGATGATGWRTAYSWMYSGGRCKTGKTRRA   | 22500 |
| Bhutan-09027    | AGYYMSKKYYCGTTGTRKTMMMTGMRARKAGATGATGWRTAYSWMYSGGRCKTGKTRRA   | 22500 |
| Bhutan-09030    | AGYYMSKKYYCGTTGTRKTMMMTGMRARKAGATGATGWRTAYSWMYSGGRCKTGKTRRA   | 22500 |
| Bhutan-09005    | RKCYMGTTYWAAAYWRGAGYCCMWRCGGAGRTCKRWYKWAYRTCACCRSAAGTKYSTYAGR | 22500 |
| Indonesia-88035 | RKCYMGTTYWAAAYWRGAGYCCMWRCGGAGRTCKRWYKWAYRTCACCRSAAGTKYSTYAGR | 22500 |
| Indonesia-88045 | RKCYMGTTYWAAAYWRGAGYCCMWRCGGAGRTCKRWYKWAYRTCACCRSAAGTKYSTYAGR | 22500 |
| Indonesia-88065 | RKCYMGTTYWAAAYWRGAGYCCMWRCGGAGRTCKRWYKWAYRTCACCRSAAGTKYSTYAGR | 22500 |
|                 | ** . . . * : . . * . * . * . * . * . *                        |       |
| Bhutan-09015    | TTCYKRCMTCCRYTGTRAMARRRACAARGMRTMTWCACGMAACRRMYTAYYGAKKMGGGY  | 22560 |
| Bhutan-09024    | TTCYKRCMTCCRYTRYRAMARRRACAARGMRTMTWCACGMAACRRMYTAYYGAKKMGGGY  | 22560 |
| Bhutan-09027    | TTCYKRCMTCCRYTRYRAMARRRACAARGMRTMTWCACGMAACRRMYTAYYGAKKMGGGY  | 22560 |
| Bhutan-09030    | TTCYKRCMTCCRYTRYRAMARRRACAARGMRTMTWCACGMAACRRMYTAYYGAKKMGGGY  | 22560 |
| Bhutan-09005    | YYSTGASMYYYRYKGTTRWRARMMWGRCAAMYWYMYRMWRYAAAAYKTTTCRGTTARSRT  | 22560 |
| Indonesia-88035 | YYSTGASMYYYRYKGTTRWRARMMWGRCAAMYWYMYRMWRYAAAAYKTTTCRGTTARSRT  | 22560 |
| Indonesia-88045 | YYSTGASMYYYRYKGTTRWRARMMWGRCAAMYWYMYRMWRYAAAAYKTTTCRGTTARSRT  | 22560 |
| Indonesia-88065 | YYSTGASMYYYRYKGTTRWRARMMWGRCAAMYWYMYRMWRYAAAAYKTTTCRGTTARSRT  | 22560 |
|                 | . * * * . * * * * * * * * * * . . . .                         |       |
| Bhutan-09015    | SAAWYARYAYRTGYRWAWWTAMTWGRCSKGYGAYWAATYKYTYATSACWGGYARYRAGY   | 22620 |
| Bhutan-09024    | SAAWYARYAYRTGYRWAWWTAMTWGRCSKGYGAYWAATYKYTYATSACWGGYARYRAGY   | 22620 |
| Bhutan-09027    | SAAWYARCATYRTGYRWAWWTAMTWGRCSKGYGAYWAATYKYTYATSACWGGYARYRAGY  | 22620 |
| Bhutan-09030    | SAAWYARCATYRTGYRWAWWTAMTWGRCSKGYGAYWAATYKYTYATSACWGGYARYRAGY  | 22620 |
| Bhutan-09005    | SRRATRAYRYTGCAATGTAYCCATAGSGGGYAMYTTWTTTCYCRKGGMWRSWGTAGKY    | 22620 |
| Indonesia-88035 | SRRATRAYRYTGCAATGTAYCCATAGSGGGYAMYTTWTTTCYCRKGGMWRSWGTAGKY    | 22620 |
| Indonesia-88045 | SRRATRAYRYTGCAATGTAYCCATAGSGGGYAMYTTWTTTCYCRKGGMWRSWGTAGKY    | 22620 |
| Indonesia-88065 | SRRATRAYRYTGCAATGTAYCCATAGSGGGYAMYTTWTTTCYCRKGGMWRSWGTAGKY    | 22620 |
|                 | * . * . . : . . . * * : . . . * . . *                         |       |
| Bhutan-09015    | RSTRRRWGTWWSGRRCTCRRRGAWAAKRYCWSYYYCGYACRCYKRAKRAYATCCYASYCA  | 22680 |
| Bhutan-09024    | RSTRRRWGTWWSGRRCTCRRRGAWAAKRYCWSYYYCGYACRCYKRAKRAYATCCYASYCA  | 22680 |
| Bhutan-09027    | RSTRRRWGTWWSGRRCTCRRRGAWAAKRYCWSYYYCGYACRCYKRAKRAYATCCYASYCA  | 22680 |
| Bhutan-09030    | RSTRRRWGTWWSGRRCTCRRRGAWAAKRYCWSYYYCGYACRCYKRAKRAYATCCYASYCA  | 22680 |

|                 |                                                                |       |
|-----------------|----------------------------------------------------------------|-------|
| Bhutan-09005    | ACCRGRAAAAWCKGRSYYGAARGARATRTMASCYMSCRTAMTGGRRGRCRWYSTWGYSR    | 22680 |
| Indonesia-88035 | ACCRGRAAAAWCKRRCCYGAARGARRTRTMASCYMSCRCAMTGGRRGRACRWYSTWGYSR   | 22680 |
| Indonesia-88045 | ACCRGRAAAAWCKRRSCYGAARGARRTRTMASCYMSCRCAMTGGRRGRACRWYSTWGYSR   | 22680 |
| Indonesia-88065 | ACCRGRAAAAWCKGRSCYGAARGARATRTMASCYMSCRTAMTGGRRGRCRWYSTWGYSR    | 22680 |
|                 | . * * * . : * . * . . . * . * * . . * . . * .                  |       |
| Bhutan-09015    | YTRYWAMSSGRTYRWAAYCGYYTGCGRGTGTARTGTGRKCRRYGWTYYRCSAYCRYRAYT   | 22740 |
| Bhutan-09024    | YTRYWAMSSGRTYRWAAYCGYYTGCGRGTGTARTKYGRKCRRYGWTYYRCSAYCRYRAYT   | 22740 |
| Bhutan-09027    | YTRYWAMSSGRTCAWAAYCGYYTGCGRGTGTARTKYGRKCRRYGWTYYRCSAYCRYRAYT   | 22740 |
| Bhutan-09030    | YTRYWAMSSGRTYRWAAYCGYYTGCGRGTGTARTKYGRKCRRYGWTYYRCSAYCRYRAYT   | 22740 |
| Bhutan-09005    | CKGTWRASSKAKCAAMGYAYCYKRYARYRTARCKYKRKYGATKTKCYGYGRTMRCRRYY    | 22740 |
| Indonesia-88035 | CKGTWRASSKAKCAAMGCYRYCTGRYARYRTARCGTKRKYGATKTKCYGYGRTMRCARYY   | 22740 |
| Indonesia-88045 | CKGTWRASSKAKCAAMGCYRYCTGRYARYRMRCKYKRKYGATKTKCYGYGRTMRCARYY    | 22740 |
| Indonesia-88065 | CKGTWRASSKAKCAAMGYAYCYKRYARYRTARCKYKRKYGATKTKCYGYGRTMRCRRYY    | 22740 |
|                 | . * * * . . * . * * . . * . * * .                              |       |
| Bhutan-09015    | YWRATRTAGWTGRAKAYWWRGKAYAWGAYARYYYTRMATKYRYWCGYKACATATAGYAYA   | 22800 |
| Bhutan-09024    | YWRATRTAGWTGRAKAYWWRGKAYAWGAYARYYYTRMATKYRYWCGYKACATATAGYAYA   | 22800 |
| Bhutan-09027    | YWRATRTAGWTGRAKAYWWRGKAYAWGAYARYYYTRMATKYRYWCGYKACATATAGYAYA   | 22800 |
| Bhutan-09030    | YWRATRTAGWTGRAKAYWWRGKAYAWGAYARYYYTRMATKYRYWCGYKACATATAGYAYA   | 22800 |
| Bhutan-09005    | CAAMTGTTTRTWARRKRYTAGRGWYWWKGYWAYTTYARGWKCRYAGKCKWMMWYGWRCYMTT | 22800 |
| Indonesia-88035 | CAAMYGKTRTWARRKRYTAGRGWYWWKGYWAYTTYARGWKCRYAGKCKWMMWYGWRCYATT  | 22800 |
| Indonesia-88045 | CAAMYGKTRTWARRKRYTAGRGWYWWKGYWAYTTYARGWKCRYAGKCKWMMWYGWRCYATT  | 22800 |
| Indonesia-88065 | CAAMTGTTTRTWARRKRYTAGRGWYWWKGYWAYTTYARGWKCRYAGKCKWMMWYGWRCYMTT | 22800 |
|                 | . : . * * * . * * . * * . * * * . * . * * :                    |       |
| Bhutan-09015    | MRKCAWRYYARKSYTYRWYGCWRKMACSMRYYSRARTTYRGGGRWYTYTWACCSYCCAT    | 22860 |
| Bhutan-09024    | MRKCAWRYYARKSYTYRWYGCWAKMACSMRYYSRARTTYRGGGRWYTYTWACCSYCCAT    | 22860 |
| Bhutan-09027    | MRKCAWRYYARKSYTYRWYGCWAKMACSMRYYSRARTTYRGGGRWYTYTWACCSYCCAT    | 22860 |
| Bhutan-09030    | MRKCAWRYYARKSYTYRWYGCWAKMACSMRYYSRARTTYRGGGRWYTYTWACCSYCCAT    | 22860 |
| Bhutan-09005    | AAGYRWGTTARTGYCRWYATRRAKAMGSMATTSGRAAKYGKRRATWYTYTKTRGSCYTRY   | 22860 |
| Indonesia-88035 | AAGYRWGTTTRRTGYCRWYATRATAMCSMATTSGRAWKYGKRRATWYTYTKTRGSCYTRY   | 22860 |
| Indonesia-88045 | AAGYRWGTTTRRTGYCRWYATRATAMCSMATTSGRAWKYGKRRATWYTYTKTRGSCYTRY   | 22860 |
| Indonesia-88065 | AAGYRWGTTARTGYCRWYATRRAKAMGSMATTSGRAAKYGKGGATWYTYTKTRGSCYTRY   | 22860 |
|                 | * * * * . * * * . * * * . * * * . * . . .                      |       |
| Bhutan-09015    | GKRRKGRRRMWGARYAMGMTWRAAMSRYGYMGTRYWYWRARTAASKKRYCWSKCGCCAM    | 22920 |
| Bhutan-09024    | GKRRKGRRRMWGARYAMGMTWRAAMSRYGYMGTRYWYWRARTAASKKRYCWSKCGCCAM    | 22920 |
| Bhutan-09027    | GKRRKGRRRMWGARYAMGMTWRAAMSRYGYMGTRYWYWRARTAASKKRYCWSKCRYCAM    | 22920 |
| Bhutan-09030    | GKRRKGRRRMWGARYAMGMTWRAAMSRYGYMGTRYWYWRARTAASKKRYCWSKCGCCAM    | 22920 |
| Bhutan-09005    | RKGAKRRRRAAGMACMCKATAARRCCYGACCCRTWCTTRMGKWWSTKGTSTSTYGYMWM    | 22920 |
| Indonesia-88035 | RKRAKRRRRAAKMACMCKACAARRCSYGACCCRTWCTTRMGKWWSTKGTSTSTYGYMWM    | 22920 |
| Indonesia-88045 | RKRAKRRRRAAKMACMCKACAARRCSYGACCCRTWCTTRMGKWWSTKGTSTSTYGYMWM    | 22920 |
| Indonesia-88065 | RKGAKRRRRAAGMACMCKATAARRCCYGACCCRTWCTTRMGKWWSTKGTSTSTYGYMWM    | 22920 |
|                 | * * * * . * * * . * * * . * * * . * . . .                      |       |
| Bhutan-09015    | YKYRACYSAGGKAGAAATYKSKRKYWTGCGYKGCSSYMWYMYSTAASRRRGTRKYRCRM    | 22980 |
| Bhutan-09024    | YKYRACYSAGGKAGAAATYKSKRKYWTGCGYKGCSSYMWYMYSTAASRRRGTRKYRCRM    | 22980 |
| Bhutan-09027    | YKYRACYSAGGKAGAAATYKSKRKYWTGCGYKGCSSYMWYMYSTAASRRRGTRKYRCRM    | 22980 |
| Bhutan-09030    | YKYRACYSAGGKAGAAATYKSKRKYWTGCGYKGCSSYMWYMYSTAASRRRGTRKYRCRM    | 22980 |
| Bhutan-09005    | TKCRRTYCRARGCAWGRWYTTSGGGWCWKYCRKTGCTTAWYCCCKRWSGGRRTRKCRATA   | 22980 |
| Indonesia-88035 | TKCRRTYCRARGCRWAWYTTSGGGWYWKYCRKTGCTTAWYCCCKRWSGGRRCAKCRATA    | 22980 |
| Indonesia-88045 | TKCRRTYCRARGCRWAWYTTSGGGWYWKYCRKTGCTTAWYCCCKRWSGGRRCAKCRATA    | 22980 |
| Indonesia-88065 | TKCRRTYCRARGCAWGRWYTTSGGGWCWKYCRKTGCTTAWYCCCKRWSGGRRTRKCRATA   | 22980 |

\* \* \* . . . \* . \* \* . . . \* \* \*

Bhutan-09015 RAGGTCGAYRASATMCGSRMRYTKRKMGCRTYYRGGAKRRRGYYWGARTAAGTGRARAM 23040

Bhutan-09024 RAGGTCGAYRASATMCGSRMRYTKRKMGCRTYYRGGAKRRRGYYWGARTAAGTGRARAM 23040

Bhutan-09027 RAGGTCRAYRASATMCGSRMRYTKRKMGCRTYYRGGAKRRRGYYWGARTAAGTGRARAM 23040

Bhutan-09030 RAGGTCGAYRASATMCGSRMRYTKRKMGCRTYYRGGAKRRRGYYWGARTRAGTGRARAM 23040

Bhutan-09005 RAKSGARRYRRGRYAAAGATMACYKATCRMATCTGKRWKRAAKYCTCRATAAGGARMRRC 23040

Indonesia-88035 RAKSGARRYRRGRYAAAGATAACYGATCRMAYCTGKRWTAATAKYCTCRAWRWGARMRRC 23040

Indonesia-88045 RWKSGARRCRRGRYAAAGATAACYGATCRMAYCTGKRWTAATAKYCTCRAWAARGARMRRC 23040

Indonesia-88065 RTKSGARRYRRGRYAAAGATMACYKATCRMAYCTGKRWKRAAKYCTCRATRWWGARMRRC 23040

\* . . \* . . . . . \* . . . \* \*

Bhutan-09015 KCTCKWTTTGRRTSRYYKYSMRTMWTYRRWYRGYYGKYWYYYKTAKMYGCRACKWMTAAS 23100

Bhutan-09024 KCTCKWTTTGRRTSRYYKYSMRTMWTYRRWYRGYYGKYWYYYKTAKMYGCRACKWMTAAS 23100

Bhutan-09027 KCTCKWTTTGRRTSRYYKYSMRTMWTYRRWYRGYYGKYWYYYKTAKMYGCRACKWMTAAS 23100

Bhutan-09030 KCTCKWTTTGRRTSRYYKYSMRTMWTYRRWYRGYYGKYWYYYKTAKMYGCRACKWMTAAS 23100

Bhutan-09005 TMYTTAYTGAATGGCCKTSMGYCAWCAGTGRCTTKTYWYTYGKRKMTTATKWMYMWWS 23100

Indonesia-88035 TMYTTWAYYRRAYGGCCKTSMGYCAWCAGTGRCTTGTCWYTYGCRKMTTATKWMYAAS 23100

Indonesia-88045 TMYTTWAYYRRAYGGCCKTSMGYCAWCAGTGRCTTGTCWYTYGCRKMTTATKWMYAAS 23100

Indonesia-88065 TMYTTAYTGAATGGCCKTSMGYCAWCAGTGRCTTKTYWYTYGKRKMTTATKWMYMWWS 23100

. . : . \*\* . \*\* \* \*\* :\*\*\* \*

Bhutan-09015 TYTYRYATGTGYTARYGACTYRRWYRCKCTGCGYGTSMWCGKCCGSTRWGYWVWCAAA 23160

Bhutan-09024 TYTYRYATGTGYTARYGACTYRRWYRCKCTGCGYGTSMWCGKCCGSTRWGYWVWCAAA 23160

Bhutan-09027 TYTYRYATGTGYTARYGACTYRRWYRCKCTGCGYGTSMWCGKCCGSTRWGYWVWCAAA 23160

Bhutan-09030 TYTYRYATGTGYTARYGACTYRRWYRCKCTGCGYGTSMWCGKCCGSTRWGYWVWCAAA 23160

Bhutan-09005 YYGTTRYAKSWRCCMRCRTGYCYRGGWYGYGKRYCGYCCFTSGGCYSGYAWRYWVWVSCRR 23160

Indonesia-88035 YYGTTRYAKSWRCCMRCRTGYCYRGGWYGYGKRYCGYCCFTSGRMYSYAWRYWVWVSCRR 23160

Indonesia-88045 YYGTTRYAKSWRCCMRCRTGYCYRGGWYGYGKRYCGYCCFTSGRMYSYAWRYWVWVSCRR 23160

Indonesia-88065 YYGTTRYAKSWRCCMRCRTGYCYRGGWYGYGKRYCGYCCFTSGGCYSGYAWRYWVWVSCRR 23160

\* \*\* . . \* \* . \* \*\*\* . . . . . \* \*\* ..

Bhutan-09015 GMRAAAAKCGCSKMRRRKMKTWWRASATCATGMATRMSYYAMWSKTKRCCTYRTGTCRYYC 23220

Bhutan-09024 GMRAAAAKCGCSKMRRRKMKTWWRASATCATGMATRMSYYAMWSKTKRCCTYRTGTCRYYC 23220

Bhutan-09027 GMRAAAAKCGCSKMRRRKMKTWWRASATCATGMATRMSYYAMWSKTKRCCTYRTGTCRYYC 23220

Bhutan-09030 GMRAAAAKCGCSKMRRRKMKTWWRASATCATGMATRMSYYAMWSKTKRCCTYRTGTCRYYC 23220

Bhutan-09005 ACAMRCAKCRYSKMRAGGCTYTWWRWCKYRATARYAMSYYACWCWTKRSYWTAYAYRYCTC 23220

Indonesia-88035 AAAAACWKYAYCGMRAGGCTYTWWRWCKYRATARYAMSYYACWCWTKRSYWTAYAYRYCTY 23220

Indonesia-88045 AAAAACWKYAYCGMRAGGCTYTWWRWCKYRATARYAMSYYACWCWTKRSYWTAYAYRYCTY 23220

Indonesia-88065 ACAMRCAKCRYSKMRAGGCTYTWWRWCKYRATARYAMSYYACWCWTKRSYWTAYAYRYCTC 23220

. . \* . \*\* . \*\* .. : \*\*\* \* . \*\* . \*

Bhutan-09015 CYWTCSTRACYCYGRAMCYKRYWMTGRWWAGRWARCACGTCMRYRGTGYTYCACTYRGCW 23280

Bhutan-09024 CYWTCSTRACYCYGRAMCYKRYWMTGRWWAGRWARCACGTCMRYRGTGYTYCACTYRGCW 23280

Bhutan-09027 CYWTCSTRACYCYGRAMCYKRYWMTGRWWAGRWARCACGTCMRYRGTGYTYCACTYRGCW 23280

Bhutan-09030 CYWTCSTRACYCYGRAMCYKRYWMTGRWWAGRWARCACGTCMRYRGTGYTYCACTYRGCW 23280

Bhutan-09005 STWTCGTMGMTGCGRRCTYKRYWCYARTARSAATRYRMGTSCRYGKCTCYTYRMWYAAAYW 23280

Indonesia-88035 CTWKYGKMAMTSCRRTYKRYWCYARTARSAATRYRMGTSCRYGKCTCYTYRMWYAAAYW 23280

Indonesia-88045 CTWKYGKMAMTSCRRTYKRYWCYARTARSAATRYRMGTSCRYGKCTCYTYRMWYAAAYW 23280

Indonesia-88065 STWTCGTMGMTGCGRRCTYKRYWCYARTARSAATRYRMGTSCRYGKCTCYTYRMWYAAAYW 23280

. \* . . . \* \*\*\*\*\* . . : \* . \*\* \* . \*

Bhutan-09015 WYWMYRKAGGYTGYGRTKRYCYRMKWTYRCGWYRKRWRARKAYYSRRRARSRCYWMT 23340

Bhutan-09024 WYWMYRKAGGYTGYGRTKRYCYRMKWTYRCGWYRKRWRARKAYYSRRRARSRCYWMT 23340

|                 |                                                               |       |
|-----------------|---------------------------------------------------------------|-------|
| Bhutan-09027    | WYWMYRKAGGYTGYGRTRKRYCYRMKWTTRCGWYTRKWRARKAYYYSCRARSRCYWMT    | 23340 |
| Bhutan-09030    | WYWMYRKAGGYTGYGRTRKRYCYRMKWTTRCGWYTRKWRARKAYYYSCRARSRCYWMT    | 23340 |
| Bhutan-09005    | TTWMTGTRSRRTWSYGGWKRCSYRATATAAAYSWAYAGAGRAAKWYYTGAAAWRCRTTWCT | 23340 |
| Indonesia-88035 | WYWMYRKAGGYTGYGRTRKRYCYRMKWTTRCGWYTRKWRARKAYYYSCRARSRCYWMT    | 23340 |
| Indonesia-88045 | WYWMYRKAGGYTGYGRTRKRYCYRMKWTTRCGWYTRKWRARKAYYYSCRARSRCYWMT    | 23340 |
| Indonesia-88065 | TTWMTGTRSRRTWSYGGWKRCSYRATATAAAYSWAYAGAGRAAKWYYTGAAAWRCRTTWCT | 23340 |
|                 | * * . . . * ** * . : . : * * * * . * . *                      |       |
| Bhutan-09015    | YASYCWWMKKKAKTGGCRTGMRCYACSMYKYMTCAIRYTYMYKWCWAYARWRAYRYRKC   | 23400 |
| Bhutan-09024    | YASYCWWMKKKAKTGGCRTGMRCYACSMYKYMTCAIRYTYMYKWCWAYARWRAYRYRKC   | 23400 |
| Bhutan-09027    | YASYCWWMKKKAKTGGCRTGMRCYACSMYKYMTCAIRYTYMYKWCWAYARWRAYRYRKC   | 23400 |
| Bhutan-09030    | YASYCWWMKKKAKTGGCRTGMRCYACSMYKYMTCAIRYTYMYKWCWAYARWRAYRYRKC   | 23400 |
| Bhutan-09005    | YCGYTWAKKTRGKRRCRARYCMTSMYTCCTCWCRTTKYMTCTWRYMRWRGCTACRGS     | 23400 |
| Indonesia-88035 | YCGYTWAKKTRGKRRCRARYCMTSMYTCCTCWCRTTKYMTCTWRYMRWRGCTACRGS     | 23400 |
| Indonesia-88045 | YCGYTWAKKTRGKRRCRARYCMTSMYTCCTCWCRTTKYMTCTWRYMRWRGCTACRGS     | 23400 |
| Indonesia-88065 | YCGYTWAKKTRGKRRCRARYCMTSMYTCCTCWCRTTKYMTCTWRYMRWRGCTACRGS     | 23400 |
|                 | * . * * * . . * * * * . . * . * * * * . * .                   |       |
| Bhutan-09015    | TYAYYGRGWYTMRYSRGGGAYRYRCMRAGWKYYSTYMKAKYRYMYTYWACCARMYKA     | 23460 |
| Bhutan-09024    | TYAYYGRGWYTMRYSRGGGAYRYRCMRAGWKYYSTYMKAKYRYMYTYWACCARMYKA     | 23460 |
| Bhutan-09027    | TYAYYGRGWYTMRYSRGGGAYRYRCMRAGWKYYSTYMKAKYRYMYTYWACCARMYKA     | 23460 |
| Bhutan-09030    | TYAYYGRGWYTMRYSRGGGAYRYRCMRAGWKYYSTYMKAKYRYMYTYWACCARMYKA     | 23460 |
| Bhutan-09005    | KYRYYKGGWYMGYSGRKKRYGYAYMRRKAKTYCKTCKMGTGCTMYTYTGSYWAMTMR     | 23460 |
| Indonesia-88035 | KYRYYKGGWYMGYSGRKKRYGYAYMRRKAKTYCKTCKMGTGCTMYTYTGSYWAMTMR     | 23460 |
| Indonesia-88045 | KYRYYKGGWYMGYSGRKKRYGYAYMRRKAKTYCKTCKMGTGCTMYTYTGSYWAMTMR     | 23460 |
| Indonesia-88065 | KYRYYKGGWYMGYSGRKKRYGYAYMRRKAKTYCKTCKMGTGCTMYTYTGSYWAMTMR     | 23460 |
|                 | . * * * * * * * * * * * * * * * * * * * * * * * * * * * * * * |       |
| Bhutan-09015    | YRGTSYRTCWRRMYMSTYTRGCRYRYRAWGTRRRCGWARRAWRAYCYWGRYRYKARYKY   | 23520 |
| Bhutan-09024    | YRGTSYRTCWRRMYMSTYTRGCRYRYRAWGTRRRCGWARRAWRAYCYWGRYRYKARYKY   | 23520 |
| Bhutan-09027    | YRGTSYRTCWRRMYMSTYTRGCRYRYRAWGTRRRCGWARRAWRAYCYWGRYRYKARYKY   | 23520 |
| Bhutan-09030    | YRGTSYRTCWRRMYMSTYTRGCRYRYRAWGTRRRCGWARRAWRAYCYWGRYRYKARYKY   | 23520 |
| Bhutan-09005    | TGRACCAYYTARMCAGYTWRMATRCGWTRKAAACAWRAGARTTYTTAAGTCYRGYKT     | 23520 |
| Indonesia-88035 | TGRACCAYYTARMCAGYTWRMATRCGWTRKAAACAWRAGARTTYTTAAGTCYRGYKT     | 23520 |
| Indonesia-88045 | TGRACCAYYTARMCAGYTWRMATRCGWTRKAAACAWRAGARTTYTTAAGTCYRGYKT     | 23520 |
| Indonesia-88065 | TGRACCAYYTARMCAGYTWRMATRCGWTRKAAACAWRAGARTTYTTAAGTCYRGYKT     | 23520 |
|                 | : . * . . . * * . * : . . *                                   |       |
| Bhutan-09015    | SYTTRRYRSYYRMKAYYTMATYYARSARKTTCRYTMCRCRKKAWGMKGKYSTWRCRRRG   | 23580 |
| Bhutan-09024    | SYTTRRYRSYYRMKAYYTMATYYARSARKTTCRYTMCRCRKKAWGMKGKYSTWRCRRRG   | 23580 |
| Bhutan-09027    | SYTTRRYRSYYRMKAYYTMATYYARSARKTTCRYTMCRCRKKAWGMKGKYSTWRCRRRG   | 23580 |
| Bhutan-09030    | SYTTRRYRSYYRMKAYYTMATYYARSARKTTCRYTMCRCRKKAWGMKGKYSTWRCRRRG   | 23580 |
| Bhutan-09005    | GYYRRTGGCCRAKATYYARYYRSATGKWKAGTYCTGYGGMAGCKYSGWGSRRARR       | 23580 |
| Indonesia-88035 | GYYRRTGGCCRAKATYYARYYRSATGKWKAGTYCTGYGGMAGCKYSGWGSRRARR       | 23580 |
| Indonesia-88045 | GYYRRTGGCCRAKATYYARYYRSATGKWKAGTYCTGYGGMAGCKYSGWGSRRARR       | 23580 |
| Indonesia-88065 | GYYRRTGGCCRAKATYYARYYRSATGKWKAGTYCTGYGGMAGCKYSGWGSRRARR       | 23580 |
|                 | . * * * . * * * * * * * * : * . . * * * * * * * * * *         |       |
| Bhutan-09015    | CKKGCTTAGGTMKTRRSSWYGCYSCRRYGMWGGCWCWCYMRTTYKKWYRRRAYATYYM    | 23640 |
| Bhutan-09024    | CKKGCTTAGGTMKTRRSSWYGCYSCRRYGMWGGCWCWCYMRTTYKKWYRRRAYATYYM    | 23640 |
| Bhutan-09027    | CKKGCTTAGGTMKTRRSSWYGCYSCRRYGMWGGCWCWCYMRTTYKKWYRRRAYATYYM    | 23640 |
| Bhutan-09030    | CKKGCTTAGGTMKTRRSSWYGCYSCRRYGMWGGCWCWCYMRTTYKKWYRRRAYATYYM    | 23640 |
| Bhutan-09005    | CKKRCTTMRGWATYAASKTTSSCTTRGCRATAARRSWSWCMATAACKKWCGRYRYYYC    | 23640 |
| Indonesia-88035 | YGKRYWMMRWATYAASKTTSSCTTRGCRATAARRSWSWCMATAACKKWCGRYRYYYC     | 23640 |

Indonesia-88045 YGKRYWMMRRWATTAASKTTSSCSTTRGCRTAARRSWSWCMMAWACKKWCKGGRYRYYYC 23640  
Indonesia-88065 CKKRCTTMRGWATYAASKTTSSCSTTRGCRTAARRSWSWCMATAACKKWCGGGRYRTYYC 23640  
\* . \* . . \* \* . \* . \* : \* \* \* \* \* \*

Bhutan-09015 TRWARAWRTYCYAYSWRRRMKTATRYACMGARYAGGGTYRCATAKRYTARATRRGYTCYA 23700  
Bhutan-09024 TRWARAWRTYCYAYSWRRRMKTATRYACMGARYAGGGTYRCATAKRYTARATRRGYTCYA 23700  
Bhutan-09027 TRWARAWRTYCYAYSWRRRMKTATRYACMGARYAGGGTYRCATAKRYTARATRRGYTCYA 23700  
Bhutan-09030 TRWARAWRTYCYAYSWRRRMKTATRYACMGARYAGGGTYRCATAKRYTARATRRGYTCYA 23700  
Bhutan-09005 WAWMGWRYYYTRTSARAGMGYRYRCRYCGAGTRSRSYRARCCKAYCCGRKARRYKMYR 23700  
Indonesia-88035 WAWMGWRYYYTRTSARAGMGYRYRCRYCGAGTRSRSYRARCCKAYCCGRKARRYKMYR 23700  
Indonesia-88045 WAWMGWRYYYTRTSARAGMGYRYRCRYCGAGTRSRSYRARCCKAYCCGRKARRYKMYR 23700  
Indonesia-88065 WAWMGWRYYYTRTSARAGMGYRYRCRYCGAGTRSRSYRARCCKAYCCGRKARRYKMYR 23700  
\* \* \* \* . \* \* \* \* . . \* \* . \* \* . \* \* . \*

Bhutan-09015 KGWTYSCMCRYRYRYSYYYAWTRMCRCSWTYCRYTKWYCYGWYGGGTCSWRRRAAGSRCW 23760  
Bhutan-09024 KGWTYSCMCRYRYRYSYYYAWTRMCRCSWTYCRYTKWYCYGWYGGGTCSWRRRAAGSRCW 23760  
Bhutan-09027 KGWTYSCMCRYRYRYSYYYAWTRMCRCSWTYCRYTKWYCYGWYGGGTCSWRRRAAGSRCW 23760  
Bhutan-09030 KGWTYSCMCRYRYRYSYYYAWTRMCRCSWTYCRYTKWYCYGWYGGGTCSWRRRAAGSRCW 23760  
Bhutan-09005 TRAWYSSAYATTATCTTTRAKAASGTSACTAGYKTTYYSACYSGGTSSAARRRRSSRSW 23760  
Indonesia-88035 TRAWYSSAYATTATCTTTRAKAASGTSACTAGYKTTYYSACYSGGTSSAARRRRSSRSW 23760  
Indonesia-88045 TRAWYSSAYATTATCTTTRAKAASGTSACTAGYKTTYYSACYSGGTSSAARRRRSSRSW 23760  
Indonesia-88065 TRAWYSSAYATTATCTTTRAKAASGTSACTAGYKTTYYSACYSGGTSSAARRRRSSRSW 23760  
. \* \* . . . \* . \* \* \* . . \* \* \* \* . \*

Bhutan-09015 SAYRWYYYMAYYGYRSKWTWYSRSYASWRGAYRMGRCTTAMCKSYRARCRRTYSRSGYYY 23820  
Bhutan-09024 SAYRWYYYMAYYGYRSKWTWYSRSYASWRGAYRMGRCTTAMCKSYRARCRRTYSRSGYYY 23820  
Bhutan-09027 SAYRWYYYMAYYGYRSKWTWYSRSYASWRGAYRMGRCTTAMCKSYRARCRRTYSRSGYYY 23820  
Bhutan-09030 SAYRWYYYMAYYGYRSKWTWYSRSYASWRGAYRMGRCTTAMCKSYRARCRRTYSRSGYYY 23820  
Bhutan-09005 CWMGWYTYMMTTRYRGKWWTGGSYRGWGRRYRARRSYWRACKGYRRGTGRGYCAGRTCT 23820  
Indonesia-88035 CWMGWYTYMMTTRYRGKWWTGGSYRGWGRRYRARRSYWRACKGYRRGTGRGYCAGRTCT 23820  
Indonesia-88045 CWMGWYTYMMTTRYRGKWWTGGSYRGWGRRYRARRSYWRACKGYRRGTGRGYCAGRTCT 23820  
Indonesia-88065 CWMGWYTYMMTTRYRGKWWTGGSYRGWGRRYRARRSYWRACKGYRRGTGRGYCAGRTCT 23820  
. \* \* \* \* \* \* \* \* . \* \* \* \* \* \* \* \* . \*

Bhutan-09015 YTWTAAYRKRKSARYYGGGAYRYCRRRYCTMGMRMWYGAAYGGGGYASCMRYWTKTTT 23880  
Bhutan-09024 YTWTAAYRKRKSARYYGGGAYRYCRRRYCTMGMRMWYGAAYGGGGYASCMRYWTKTTT 23880  
Bhutan-09027 YTWTAAYRKRKSARYYGGGAYRYCRRRYCTMGMRMWYGAAYGGGGYASCMRYWTKTYT 23880  
Bhutan-09030 YTWTAAYRKRKSARYYGGGAYRYCRRRYCTMGMRMWYGAAYGGGGYASCMRYWTKTTT 23880  
Bhutan-09005 CAWKRCAGSWAYYYSGGMTTACSARRRYSYMRMGACRRRYSRSRYRSMGYAYKTTY 23880  
Indonesia-88035 CAWKRCAGSWAYYYSGGMTTACSARRRYSYMRMGACRRRYSRSRYRSMGYAYKTTY 23880  
Indonesia-88045 CAWKRCAGSWAYYYSGGMTTACSARRRYSYMRMGACRRRYSRSRYRSMGYAYKTTY 23880  
Indonesia-88065 CAWKRCAGSWAYYYSGGMTTACSARRRYSYMRMGACRRRYSRSRYRSMGYAYKTTY 23880  
: \* . \* \* \* \* . . \* \* \* \* \* \* \* \* . \*

Bhutan-09015 MRYYYWTTYTTAYRAWWYTCYRTAAAGYRSCKTRYRTRYSYTTRMRRRYATGTSRSRK 23940  
Bhutan-09024 MRYYYWTTYTTAYRAWWYTCYRTAAAGYRSCKTRYRTRYSYTYRMRRYATGTSRSRK 23940  
Bhutan-09027 MRYYYWTTYTTAYRAWWYTCYRTAAAGYRSCKTRYRTACSITYRMRRYATGTSRSRK 23940  
Bhutan-09030 MRYYYWTTYTTAYRAWWYTCYRTAAAGYRSCKTRYRTRYSYTYRMRRYATGTSRSRK 23940  
Bhutan-09005 MGTTCACKTYWRTGRAWYYYRCMMTYTRCYKYRYRYRTSYGYGARRATTMWWKSRSGG 23940  
Indonesia-88035 MGTTCACKTYWRTGRAWYYYRCMMTYTRCYKYRYRYRTSYGYGARRATTMWWKSRSGG 23940  
Indonesia-88045 MGTTCACKTYWRTGRAWYYYRCMMTYTRCYKYRYRYRTSYGYGARRATTMWWKSRSGG 23940  
Indonesia-88065 MGTTCACKTYWRTGRAWYYYRCMMTYTRCYKYRYRYRTSYGYGARRATTMWWKSRSGG 23940  
\* . . \* \* \* \* \* \* \* \* \* \* \* \* . \* \* \* \*

Bhutan-09015 CYYYATYYGAKSYTMKAMWYCRSARRGSRRAWSTGGAAATARSCRCKWKRRRAYRKRYYYT 24000  
 Bhutan-09024 CYYYATYYGAKSYTMKAMWYCRSARRGSRRAWSTGGAAATARSCRCKWKRRRAYRKRYYYT 24000  
 Bhutan-09027 CYYYATYYGAKSYTMKAMWYCRSARRGSRRAWSTGGAAATARCCRCKTGAGAAAYRKRYYYT 24000  
 Bhutan-09030 CYYYATYYGAKSYTMKAMWYCRSARRGSRRAWSTGGAAATARSCRCKTGAGAAAYRKRYYYT 24000  
 Bhutan-09005 TCYCMCYCKRTSTKATGTCATYRSRARGSRGACCCACTRWCRGTRCTTGAGACYRKATYY 24000  
 Indonesia-88035 TCYCMCYCKRTSTKATGTCATYRSRARGSRGACCCACTRWCRGTRCTTWKRGACYRKATYY 24000  
 Indonesia-88045 TCYCMCYCKRTSTTATGTCATYRSRARGSRGACCCACTRWCRGTRMTWKRAGACYRKATYY 24000  
 Indonesia-88065 TCYCMCYCKRTSTTATGTCATYRSRARGSRGACCCACTRWCRGTRMTWKRAGACYRKATYY 24000  
 \* \* . \* . . . \*\* \* . . . . . : . \* \* . . . . . \*\*\* \*

Bhutan-09015 WRRRTYAGYKYARMWYTYCKRYACSTACGAGMYTACCRYRKARKTTAAASRYRYSWGRY 24060  
 Bhutan-09024 WRRRTYAGYKYARMWYTYCKRYACSTACGAGMYTACCRYRKARKTTAAASRYRYSWGRY 24060  
 Bhutan-09027 WRRRTYAGYKYARMWYTYCKRYACSTAYKRGMYTACCRYRKARKTTAAASRYRYSWGRY 24060  
 Bhutan-09030 WRRRTYAGYKYARMWYTYCKRYACSTAYKRGMYTACCRYRKARKTTAAASRYRYSWGRY 24060  
 Bhutan-09005 TAGRYRRYKTRRATYCTGGYRTGCTCGARYTCGYARYATRRGCCGWSRYRTSWKAC 24060  
 Indonesia-88035 TAGRYRRYKTRRATYCTGGYRTGCTCGARYTCGYARYATRRGCCGWSRYRTSWKAC 24060  
 Indonesia-88045 TAGRYRRYKTRRATYCTGGYRTGCTCGARYTCGYAGTATRRGCCGWSRYRTSAKAC 24060  
 Indonesia-88065 TAGRYRRYKTRRATYCTGGYRTGCTCGARYTCGYAGTATRRGCCGWSRYRTSWKAC 24060  
 \* \* \* \* \* . : . . . \* . . . . . \*\*\*\* \*

Bhutan-09015 SRRYCCKGCTYYRRKWGRTRRMKYTACCAYRRYYCCTYKASMTTAAAGRARKRAYYRA 24120  
 Bhutan-09024 SRRYCCKGCTYYRRKWGRTRRMKYTACCAYRRYYCCTYKASMTTAAAGRARKRAYYRA 24120  
 Bhutan-09027 SRRYCCKGCTYYRRKWGRTRRMKYTACCAYRRYYCCTYKASMTTAAAGRARKRAYYRR 24120  
 Bhutan-09030 SRRYCCKGCTYYRRKWGRTRRMKYTACCAYRRYYCCTYKASMTTAAAGRARKRAYYRA 24120  
 Bhutan-09005 GGACMTKSSYCYRRKWARGCAMGTGMYGTGAYYYMWWYTRGACAGCCAAMAGRRCRG 24120  
 Indonesia-88035 GGACMTKSSYCYRRKWARGCAMGTGMYGTGAYYYMWWYTRGACAGCCAAMAGRRCRG 24120  
 Indonesia-88045 GGACMTKSSYCYRRKWARGCAMGTGMYGTGAYYYMWWYTRGACAGCCAAMAGRRCRG 24120  
 Indonesia-88065 GGACMTKSSYCYRRKWARGCAMGTGMYGTGAYYYMWWYTRGACAGCCAAMAGRRCRG 24120  
 . \* . . . \*\* . \* . . . . . \*\*\* \* . . . : . . . . \* \*

Bhutan-09015 ACSTMSRYTAATGYYSRYCGAAYYSRYGSWYCSRATCGCRTAAAARCKACCYGRWRWCS 24180  
 Bhutan-09024 ACSTMSRYTRWGTGYYSRYCGAAYYSRYGSWYCSRATCGCRTAAMRCKACCYGRWRWCS 24180  
 Bhutan-09027 RCSTMSRYTAATGYYSRYCGAAYYSRYGSWYCSRATCGCRTAAMRCKACCYGRWRWCG 24180  
 Bhutan-09030 ACSTMSRYTAATGYYSRYCGAAYYSRYGSWYCSRATCGCRTAAMRCKACCYGRWRWCS 24180  
 Bhutan-09005 AYCWASAYYAACACTGCRTYSRTTCGRYRGTCYSGWYYATGYRRCRGYWCYTTTRGWGTS 24180  
 Indonesia-88035 ATCWASAYYAACACTGCRTYSRTTCGRYRGTCYSGWYYATGYRRCRGYWCYTTTRGWGTS 24180  
 Indonesia-88045 ATCWASAYYAACACTGCRTYSRTTCGRYRGTCYSGWYYATGYRRCAGYWCYTTTRGWGTG 24180  
 Indonesia-88065 ATCWASAYYAACACTGCRTYSRTTCGRYRGTCYSGWYYATGYRRCRGYWCYTTTRGWGTS 24180  
 . \* \* . . . \* . . : . \*\* . \* . . . . \* \* .

Bhutan-09015 YYYCAGTGRTMYKWSRYTRKAYYYTGCRCTCSGCCYYRWARCYRRRCGGRWYTTTK 24240  
 Bhutan-09024 YYYCAGTGRTMYKWSRYTRKAYYYTGCRCTCSGCCYYRWARCYRRRCGGRWYTTTK 24240  
 Bhutan-09027 TYYCAGTGRTMYKWSRYTRKAYYYTGCRCTCSGCCYYRWARCYRRRCGGRWYTTTK 24240  
 Bhutan-09030 YYYCAGTGRTMYKWSRYTRKAYYYTGCRCTCSGCCYYRWARCYRRRCGGRWYTTTK 24240  
 Bhutan-09005 YYCCGRYTRWCYTTGRYYRTCAYCCKRYRGYYSKYYYTGTRRTRYRARTRGRTTYKWT 24240  
 Indonesia-88035 YYCYGAYTRWCYTTGRYYRTCAYCCKRYRGYYSKYYYTGTRRTRYRARTRGRTTYKWT 24240  
 Indonesia-88045 TYCCGAYTRWCYTTGRYYRTCWYCKRYRGYYSKYYYTGTRRTRYRARTRGRTTYKWT 24240  
 Indonesia-88065 YYCCGRYTRWCYTTGRYYRTCWYCKRYRGYYSKYYYTGTRRTRYRARTRGRTTYKWT 24240  
 \* . \* \* . . . \*\* \* . \* . \* \* \* \* \* \* \* \* \* \* \* . . .

Bhutan-09015 YAYRKAKRRWTTYRTGRARAYRRTRRMGYCGTYKYYSRYYRRRWRWRWCRMYRSG 24300  
 Bhutan-09024 YAYRKAKRRWTTYRTGRARAYRRTRRMGYCGTYKYYSRYYRRRWRWRWCRMYRSG 24300  
 Bhutan-09027 YAYRKAKRRWTTYRTGRARAYRRTRRMGYCGTYKYYSRYYRRRWRWRWCRMYRSG 24300  
 Bhutan-09030 YAYRKAKRRWTTYRTGRARAYRRTRRMGYCGTYKYYSRYYRRRWRWRWCRMYRSG 24300



Bhutan-09005 TGYGGRTGRWGKYCAKRRGGCRRYGGCGCTAGYTTYGTARAYTGGGWAGWYGMCR 24300  
Indonesia-88035 YGYGGRKGRWGKYCAKRRGGCRGYGGCACCTAGYTCYGTARAYTGGGWAGWYGMCR 24300  
Indonesia-88045 YGYGGRKGRWGKYCAKRRGGCRGYGGCACCTAGYTTYGTARAYTGGGWAGWYGMCR 24300  
Indonesia-88065 TGYGGRTGRWGKYCAKRRGGCRRYGGCGCTAGYTTYGTARAYTGGGWAGWYGMCR 24300  
.\* . \*\* .\* . . \* . . \* . \* \* \* \* \*

Bhutan-09015 YGGYTRCTCYCTRCCGRRTCCAMGATGCRCTGYRMRWTGRYYMAYTYWRRTRCKRA 24360  
Bhutan-09024 YGGYTRCTCYCTRCCGRRTCCAMGATGCRCTGYRMRWTGRYYMAYTYWRRTRCKRA 24360  
Bhutan-09027 YGGYTGCTCYCTRCCGRRTCCMMGATGCRCTGYRMRWTGRYYMAYTYWRRTRCKRA 24360  
Bhutan-09030 YGGYTRCTCYCTRCCGRRTCCMMGATGCRCTGYRMRWTGRYYMAYTYWRRTRCKRA 24360  
Bhutan-09005 CGATYMYYYTCMKAGYARGGYCWSRYRYGGYRYAMRWAAAYTTCRYCWARARYGTGR 24360  
Indonesia-88035 CRATTAYCYTCMKAGYARGGYCWSRYRYGGYRYAMRWAAAYTTCRYCWARARYGTGR 24360  
Indonesia-88045 CRAYTAYCYTCMKAGYARGGYCWSRYRYGGYRYAMRWAAAYTTCRYCWARARYGTGR 24360  
Indonesia-88065 CGAYTAYYYTCMKAGYARGGYCWSRYRYGGYRYAMRWAAAYTTCRYCWARARYGTGR 24360  
. . . . \* \* \* \* . \* \* \* \*

Bhutan-09015 YWTTYCYCGRRTMYRTRGGWRGRGCRAGACMYAKCRTYACKKYYRSYKYYARCRMCYK 24420  
Bhutan-09024 YWTTYCYCGRRTMYRTRGGWRGRGCRAGACMYAKCRTYACKKYYRSYKYYARCRMCYK 24420  
Bhutan-09027 YWTTYCTCGRRTMYRTRGGWRGRGCRAGACMYAKCRTYACKKYYRSYKYYARCRMCYK 24420  
Bhutan-09030 YWTTYCYCGRRTMYRTRGGWRGRGCRAGACMYAKCRTYACKKYYRSYKYYARCRMCYK 24420  
Bhutan-09005 CTKYYSYRRGYCTMCGRKTRRGRTRRTGTACYWKGAYTTSKKYTRCYKRCRGYACYTTS 24420  
Indonesia-88035 CTKYYSYRRGYCTMCGRKTRRGRTRRTGTACTATGAYTCTKYTRCYKRCRGYACYTTS 24420  
Indonesia-88045 CTKYYSYRRGYCTMCGRKTRRGRTRRTGTACTATGAYTCTKYTRCYKRCRGYACYTTS 24420  
Indonesia-88065 CTKYYSYRRGYCTMCGRKTRRGRTRRTGTACYWKGAYTCTKYTRCYKRCRGYACYTTS 24420  
. \* . \* \* \* . . \* : . . \* \* \* \* . .

Bhutan-09015 RTGGYRGAARYTMMWKSAGYARRRKYTYWTGTYRATYRYCMYKRSYTRKAWGSTSCCAY 24480  
Bhutan-09024 RTGGYRGAARYTMMWKSAGYARRRGGYTYWTGTYRATYRYCMYKRSYTRKAWGSTSCCAY 24480  
Bhutan-09027 RTGGYRGAARYTMMWKSAGYARRRKYTYWTGTYRATYRYCMYKRSYTRKAWGSTSCCAY 24480  
Bhutan-09030 RTGGYRGAARYTMMWKSAGYARRRKYTYWTGTYRATYRYCMYKRSYTRKAWGSTSCCAY 24480  
Bhutan-09005 GKRRTAARWGTAACWGSRSRRRARGKYCWTACCARYCATYMC GGCTRTWTRCASYRC 24480  
Indonesia-88035 GKRRTAARWGTAACWGSRSRRRARGKYCWTACCARYCATYMC GGCGYRTWTRCASYRC 24480  
Indonesia-88045 GKRRTAARWGTAACWGSRSRRRARGKYCWTACCARYCATYMC GGCGYRTWTRCASYRC 24480  
Indonesia-88065 GKRRTAARWGTAACWGSRSRRRARGKYCWTACCARYCATYMC GGCTRTWTRCASYRC 24480  
. . : \* \* . \* \* \* \* . \* . \* . : \*

Bhutan-09015 WYMWWMSYMACYCYAGYRGMRTWYRWRGRGRKCYCYGKYYTRRRCKKWSYSGKTRGYK 24540  
Bhutan-09024 WYMWWMSYMACYCYAGYRGMRTWYRWRGRGRKCYCYGKYYTRRRCKKWSYSGKTRGYK 24540  
Bhutan-09027 WYMWWMSYMACYCYAGYRGMRTWYRWRGRGRKCYCYGKYYTRRRCKKWSYSGKTRGYK 24540  
Bhutan-09030 WYMWWMSYMACYCYAGYRGMRTWYRWRGRGAKCYCYGKYYTRRRCKKWSYSGKTRGYK 24540  
Bhutan-09005 WYMAAASYMCMTTRAYRRCARYTTCTATRGRGMCTTTRKTYKARAYTAGYSTKYRYRG 24540  
Indonesia-88035 WYMAAASYMCMTTRAYRRCARYTTCTATRGRGMCTTTRKTYKARAYTAGYSTKYARYG 24540  
Indonesia-88045 WYMAAASYMCMTTRAYRRCARYTTCTATRGRGMCTTTRKTYKARAYTAGYSTKCRAYG 24540  
Indonesia-88065 WYMAAASYMCMTTRAYRGCAATTTTATGGGAGMCTTTRKTYKARAYTAGYSTKYRYRG 24540  
\*\*\* \*\* . . \*\* \* \* . \* . . \*\* \* \*

Bhutan-09015 TSGKMGTYMRATYCRYKYMARRKWRARTKSYKYYCCTCKTYWTRTMSYGTGKYA 24600  
Bhutan-09024 TSGKMGTYMRATCCRYKYMARRKWRARTKSYKYYCCTCKTYWTRTMCYGTGKYA 24600  
Bhutan-09027 TSGKMGTYMRATYCRYKYMARRKWRARTKSYKYYCCTCKTYWTRTMCYGTGKYA 24600  
Bhutan-09030 TSGKMGTYMRATYCRYKYMARRKWRARTKSYKYYCCTCKTYWTRTMCYGTGKYA 24600  
Bhutan-09005 YGRTARCCAGWYCRCKKCMGGTWRWGAGGTYCYKTYGCCWWTAWCGTYKRYCR 24600  
Indonesia-88035 YGRTARCCAGWYYGCCCKCMGGTWRWGTGGTKYCTYKYGCCWWTAWCGTYKRYCR 24600  
Indonesia-88045 YGRTARCCAGWYYGCCCKCMGGTWRWGTGGTKYCTYKYGCCWWTAWCGTYKRYCR 24600  
Indonesia-88065 YGRTARCCAGWYCRCKKCMGGTWRWGAGGTYCYKTYGCCWWTAWCGTYKRYCR 24600

. . . . . \*\* . \*\* : . \*\*\* . \*\* . \* \* \*

Bhutan-09015 YWRYYSWAGWYTWARTRRKSSRYCACTYACRRTRTCGWTAYYWYGATKWYARYYKCKS 24660

Bhutan-09024 YWRYYSWAGWYTWARTRRKSSRYCACTYACRRTRTCGWTAYYWYRGATKWYARYYKCKS 24660

Bhutan-09027 YWRYYSTAGWYTWARTRRKSSAYCACTYACRRTRTCGWTAYYWYRGATKWYARYYKCKS 24660

Bhutan-09030 YWRYYSWAGWYTWARTRRKSSAYCACTYACRRTRTCGWTAYYWYGATKWYARYYKCKS 24660

Bhutan-09005 CWACYSAAKTTCWWAYAGGGCGYTYYYCGTRRWGYCAARYTYWYAGCTATGGYCTCGG 24660

Indonesia-88035 CTACTGAATTCWWAYAGGGCGYTYYYGTRRWGYRARYTYWYGGGCTTTGGYCTYGG 24660

Indonesia-88045 CTACTGWWTTTCWWAYAGGGCGYTYYYGTRRWGYRARYTYWYGGGCTTTGGYCTYGG 24660

Indonesia-88065 CWACYSWWKTTCWWAYAGGGCGYTYYYCGTRRWGYAARYTYWYAGCTATGGYCTCGG 24660

. \* . . \* : . \*\* :\*\*\*\* . . . \* . .

Bhutan-09015 YRYWGTGKRYGATAYYCKYWGRCWWRYSGAARCSYMYMKYMGTYMTRYYSWYYTRCTCCA 24720

Bhutan-09024 YRYWGTGKRYGATAYYCKYWGRCWWRYSGAARCSYMYMKYMGTYMTRYYSWYYTRCTCCA 24720

Bhutan-09027 YRYWGTGKRYGATAYYCKYWGRCWWRYSGAARCSYMYMKYMGTYMTRYYSWYYTRCTCCA 24720

Bhutan-09030 YRYWGTGKRYGATAYYCKYWGRCWWRYSGAARCSYMYMKYMGTYMTRYYSWYYTRCTCCA 24720

Bhutan-09005 CGTWRARGRYKRAPTYGGCARGMWTAYCRMRAACCTMGCARKCATGYTCWYCCAGCGGR 24720

Indonesia-88035 TRTWGAGGRYKRAPTYGGCARGCTTACCRMRAACCTMGCARKCAAGYCTCTCCAGCGGR 24720

Indonesia-88045 TRTWGAGGRYKRAPTYGGCARGMWTACCRMRAACCTMGCARKCAAGYCTCTCCAGCGGR 24720

Indonesia-88065 CGTWRARGRYKRAPTYGGCARGMWTAYCRMRAACCTMGCARKCATGYTCWYCCAGCGGR 24720

\* : \*\* :. \* . . . \* \* . : \* .

Bhutan-09015 GYRYMSCTWMAYYYKCGCTRKKYGYTSCYSYWKYSCMCTYYRYMYWCRYYYYRTG 24780

Bhutan-09024 GYRYMSCTWMAYYYKCGCTRKKYGYTSCYSYWKYSCMCTYYRYMYWCRYYYYRTG 24780

Bhutan-09027 GYRYMSCTWMAYYYKCGCTRKKYGYTSCYSYWKYSCMCTYYGCMYYWCRYYYYRTG 24780

Bhutan-09030 GYRYMSCTWMAYYYKCGCTRKKYGYTSCYSYWKYSCMCTYYRYMYWCRYYYYRTG 24780

Bhutan-09005 KYGCMSCYWMRYTTKYRAKATGTRCYKSTCTGTWYKYGAYWTCGCMCTATRRYYRYR 24780

Indonesia-88035 KYGCMSCYWMRYTTKYRAKATGTRCYKSTCTGTWYKYGAYWTCGCMCTATRRYYRYR 24780

Indonesia-88045 KYGCMSCYWMRYTTKYRAKATGTRCYKSTCTGTWYKYGAYWTCGCMCTATRRYYRYR 24780

Indonesia-88065 KYGCMSCYWMRYTTKYRAKATGTRCYKSTCTGTWYKYGAYWTCGCMCTATRRYYRYR 24780

\* \*. \* \* \* . . . \*. \* . \*\*\*. \* \*\*\*\*\*

Bhutan-09015 AGCKTYYYRSRRKCAWRRRYASATTTMSKGWTRYWYKRTRTKGYAGTRCGYGCRAGMRA 24840

Bhutan-09024 AGCKTYYYRSRRKCAWRRRYASATTTMSKGWTRYWYKRTRTKGYAGTRCGYGCRAGMRA 24840

Bhutan-09027 AGCKTYYYRSRRKCAWRRACASATTTMSKGWTRYWYKRTRTKGYAGTRCGYGCRAGMRA 24840

Bhutan-09030 AGCKTYYYRSRRKCAWRRRYASATTTMSKGWTRYWYKRTRTKGYAGTRCGYGCRAGMRA 24840

Bhutan-09005 RKTKYCCTRSRRGTWRRACWCRYYYMGKATAGCTTKRGAWTSTMRYGYCYRARSMMRR 24840

Indonesia-88035 RKTKYCCTRSRRGTWRRACACAYYYMGKATAGCTTKRGAWTSTMRYGYCYRARSMMRR 24840

Indonesia-88045 RKTKYCCTRSRRGTWRRACACAYYYMGKATAGCTTKRGAWTSTMRYGYCYRARSMMRR 24840

Indonesia-88065 RKTKYCCTRSRRGTWRRACWCRYYYMGKATAGCTTKRGAWTSTMRYGYCYRARSMMRR 24840

\* \*\*\*\* :\*\*\* . \*. \* : \*\* . \* . \*

Bhutan-09015 CGTCCCMYAGSYASRMYCGYTGRCRGMYGGMRRWSTACATSTMYTRCSSMGYRTTAYAKY 24900

Bhutan-09024 CGTCCCMYAGSYASRMYCGYTGRCRGMTGGMRRWSTACATSTMYTRCSSMGYRTTAYAKY 24900

Bhutan-09027 CGTCCCMYAGSYASRMYCGYTGRCRGMYGGMRRWSTACATSTMYTRCSSMGYRTTAYAKY 24900

Bhutan-09030 CGTCCCMYAGSYASRMYCGYTGRCRGMTGGMRRWSTACATSTMYTRCSSMGYRTTAYAKY 24900

Bhutan-09005 YRYMYMMYMKGCRGAMCTKYARGYASYCRAGRWGWTMYGKCYYGCCCRCGKGTTCRGT 24900

Indonesia-88035 YRYMYMMYMKGCRGAMCTKYARGCASYCRGMRGWWTMYGKCYYGCCCRCGKGTTCRGT 24900

Indonesia-88045 YRYMYMMYMKGCRGAMCTKYARGCASYCRGMRGWWTMYGKCYYGCCCRCGKGTTCRGT 24900

Indonesia-88065 YRYMYMMYMKGCRGAMCTKYARGYASYCRAGRWGWTMYGKCYYGCCCRCGKGTTCRGT 24900

\* . . \* \*: . \*\* : .. \* .. :

Bhutan-09015 GGGCWRRRCTCMYRYGMSAGCRGTRMGWRAATYAWWGAYCYKYYRYRRTYAYRMGRWTWC 24960

Bhutan-09024 GGGCWRRRCTCMYRYGMSAGCRGTRMGWRAATYAWWGAYCYKYYRYRRTYAYRMGRWTWC 24960

|                 |                                                               |       |
|-----------------|---------------------------------------------------------------|-------|
| Bhutan-09027    | GGGCWRRRCTCMYRYGMSAGCRGTMRGWWRRAATYAWWGAYCYKYYRYRYATAMGRWTC   | 24960 |
| Bhutan-09030    | GGGCWRRRCTCMYRYGMSAGCRGTMRGWWRRAATYAWWGAYCYKYYRYRYAYRMGRWTC   | 24960 |
| Bhutan-09005    | GGRTWRRRCATMCGTRACRRYGRKARAAAAGRRYYTWAARCYYGCCYAYGYCRCGAKRYAY | 24960 |
| Indonesia-88035 | RRRTWRARMATMCGYGMCRRYGRKARAAAAGRRYYTWAARCYYGCCYAYGYCRCGAKRYAY | 24960 |
| Indonesia-88045 | RRRTWRARMATMCGYGMCRRYGRKARAAAAGRRYYTWAARCYYGCCYAYGYCRCGAKRYAY | 24960 |
| Indonesia-88065 | GGRTWRRRCATMCGTRACRRYGRKARAAAAGRRYYTWAARCYYGCCYAYGYCRCGAKRYAY | 24960 |
|                 | * * * : * . * . * . * * * *                                   |       |
| Bhutan-09015    | WARGATARRRGTMYGGRSSSYGASSARRMARKRWWSMSTYSTYKMWAAARTMTYKRRRTK  | 25020 |
| Bhutan-09024    | WARGATARRRGTMYGGRSSSYGASSARRMARKRWWSMSTYSTYKMWAAARTMTYKRRRTK  | 25020 |
| Bhutan-09027    | WARGATARRRGTMYGGRSSSYGASSARRMARKRWWSMSTYSTYKMWAAARTMTYKRRRTK  | 25020 |
| Bhutan-09030    | WARGATARRRGTMYGGRSSSYGASSARRMARKRWWSMSTYSTYKMWAAARTMTYKRRRTK  | 25020 |
| Bhutan-09005    | WWRAWKRAGGRYACYRTGCGCTATGCRMAMRGKRTTCAGTYGYYGCACRAYCTCGKARGT  | 25020 |
| Indonesia-88035 | WWRAWKRAGGRYACYRTGCGCTATGCRMAMRGKRTTCAGTYGYYGCACRAYCTCGKARGT  | 25020 |
| Indonesia-88045 | WWRAWKRAGGRYACYRTGCGCTATGCRMAMRGKRTTCAGTYGYYGCACRAYCTCGKARGT  | 25020 |
| Indonesia-88065 | WWRAWKRAGGRYACYRTGCGCTATGCRMAMRGKRTTCAGTYGYYGCACRAYCTCGKARGT  | 25020 |
|                 | * * . . * . . . . . * * . . . * . * . * * .                   |       |
| Bhutan-09015    | YTWYTSWRRSRRTTRWYRAGGCAYSKRCARRCYTAWSGYWKYWGMYTTRRYRCYGYRMT   | 25080 |
| Bhutan-09024    | YTWYTSWRRSRRTTRWYRAGGCAYSKRCARRCYTAWSGYWKYWGMYTTRRYRCYGYRMT   | 25080 |
| Bhutan-09027    | YTWYTSWRRSRRTTRWYRAGGCAYSKRCARRCYTAWSGYWKYWGMYTTRRYRCYGYRMT   | 25080 |
| Bhutan-09030    | YTWYTSWRRSRRTTRWYRAGGCAYSKRCARRCYTAWSGYWKYWGMYTTRRYRCYGYRMT   | 25080 |
| Bhutan-09005    | TWACYCTAAGRRC TAATGTRKGMCSKGYGRASYWRWCSCWKTWTCTYWARYGCCSWCGAK | 25080 |
| Indonesia-88035 | TWACYCTAAGRRC TAATGTRKGMCSKGYGRASYWRWCSCWKTWTCTYWARYGCCSWCGAK | 25080 |
| Indonesia-88045 | TWACYCTAAGRRC TAATGTRKGMCSKGYGRASYWRWCSCWKTWTCTYWARYGCCSWCGAK | 25080 |
| Indonesia-88065 | TWACYCTAAGRRC TAATGTRKGMCSKGYGRASYWRWCSCWKTWTCTYWARYGCCSWCGAK | 25080 |
|                 | . * * : * * . * * * . * * * * * .                             |       |
| Bhutan-09015    | YRCGTRGGGYRRACTTAYCGWCMRAYWTYWAAAYCCMYMMGGWYTTTTSAYWYTCRAKY   | 25140 |
| Bhutan-09024    | YRCGTRGGGYRRACTTAYCGWCMRAYWTYWAAAYCCMYMMGGATTTTTSAYWYTCRAKY   | 25140 |
| Bhutan-09027    | YRCGTRGGGYRRACTTAYCGWCMRAYWTYWAAAYCCMYMMGGWYTTTTSAYWYTCRAKY   | 25140 |
| Bhutan-09030    | YRCGTRGGGYRRACTTAYCGWCMRAYWTYWAAAYCCMYMMGGWYTTTTSAYWYTCRAKY   | 25140 |
| Bhutan-09005    | TGMSYRGCAYRCGACTTGYSAWYMCGRWTWYARRTAMAYMMSRTACCGKRCACKYGRKC   | 25140 |
| Indonesia-88035 | TGMSYRRSAYRCGACTTGYSAWYMCGRTACYARRTAMAYMMSRTACCGKRCACKYGRKC   | 25140 |
| Indonesia-88045 | TGMSYRRSAYRCGRYKGYSAWYMCGRTACYARRTAMAYMMSRTACCGKRCACKYGRKC    | 25140 |
| Indonesia-88065 | TGMSYRGCAYRCGACTTGYSAWYMCGRWTWYARRTAMAYMMSRTACCGKRCACKYGRKC   | 25140 |
|                 | . * . * * . . * * * * * . . . . *                             |       |
| Bhutan-09015    | AYCYYYCRCRYKWWYWRARSMCSCTKWYYSYCYWRRMSMGGKATGYRGRSKRTGYRY     | 25200 |
| Bhutan-09024    | AYCYYYCRCRYKWWYWRARSMCSCTKWYYSYCYWRRMSMGGKATGYRGRSKRTGYRY     | 25200 |
| Bhutan-09027    | AYCYYYCRCRYKWWYWRARSMCSCTKWYYSYCYWRRMSMGGKATGYRGRSKRTGYRY     | 25200 |
| Bhutan-09030    | AYCYYYCRCRYKWWYWRARSMCSCTKWYYSYCYWRRMSMGGKATGYRGRSKRTGYRY     | 25200 |
| Bhutan-09005    | RWYYYTGRGRTTKAWTTAWRGCYCYWGTYTGTTTYTTRACSMRRGGGATASAGTAYRYGT  | 25200 |
| Indonesia-88035 | RWYYYTGRGRTTKAWTTAWRGCYCYWGTYTGTTTYTTRACSMRRGGGATASAGTAYRYGT  | 25200 |
| Indonesia-88045 | RWYYYTGRGRTTKAWTTAWRGCYCYWGTYTGTTTYTTRACSMRRGGGATASAGTAYRYGT  | 25200 |
| Indonesia-88065 | RWYYYTGRGRTTKAWTTAWRGCYCYWGTYTGTTTYTTRACSMRRGGGATASAGTAYRYGT  | 25200 |
|                 | : * * * * * * . . * * * . * * . . . . *                       |       |
| Bhutan-09015    | KYRGYCYCWSTGSAATMYYYKYYKRYRYAASMKCRWKKCTWGCYRRRGCRGYWSAWGCKA  | 25260 |
| Bhutan-09024    | KYRGYCCCWSTGSAATMYYYKYYKRYRYAASMKCRWKKCTWGCYRRRGCRGYWSAWGCKA  | 25260 |
| Bhutan-09027    | KYRGYCYCWSTGSAATMYYYKYYKRYRYAACKCRWKKCTWGCYRRRGCRGYWSAWGCKA   | 25260 |
| Bhutan-09030    | KYRGYCYCWSTGSAATMYYYKYYKRYRYAASMKCRWKKCTWGCYRRRGCRGYWSAWGCKA  | 25260 |
| Bhutan-09005    | TCARCTTSTGYCSCGGMTCTCTTGCRCRCCTYRWWSAWRMYRARRMAYWCWTKTTM      | 25260 |
| Indonesia-88035 | TCARCTTSTGYCSCGGMTCTCTTGCRCRCCTYRWWSAWRMYRARRMAYWCWTKTTM      | 25260 |

|                 |                                                              |       |
|-----------------|--------------------------------------------------------------|-------|
| Indonesia-88045 | TCARCTTSTGYCSCGGMTCCTCTTGCRCRMCCCTYRWGSAWRMYRARRMRAYWCWTKTTM | 25260 |
| Indonesia-88065 | TCARCTTSTGYCSCGGMTCCTCTTGCRCRMCCCTYRWGSAWRMYRARRMRAYWCWTKTTM | 25260 |
|                 | . . . *.. * . . * . . *** .:* ** * *.**.                     |       |
| Bhutan-09015    | TTMRMGYGCTMYYSYTYMKGASWSYRTYSAYARTMKRYAAMTWTGKTWYWCYGCATGW   | 25320 |
| Bhutan-09024    | TTMRMGYGCTMYYSYTYMKGASWSYRTYSAYARTMKRYAAMTWTGKTWYWCYGCATGW   | 25320 |
| Bhutan-09027    | TTMRMGYGCTMYYSYTYMKGASWSYRTYSAYARTMKRYAAMTWTGKTWYWCYGCATGW   | 25320 |
| Bhutan-09030    | TTMRMGYGCTMYYSYTYMKGASWSYRTYSAYARTMKRYAAMTWTGKTWYWCYGCATGW   | 25320 |
| Bhutan-09005    | WWMGCRTKYAMYCYCCCKRWGTGYRWYCWTRYMGYRWAWAWSCTWAWYWTCSMGT      | 25320 |
| Indonesia-88035 | WWMGCRTKYAMCCYCCCKRWGTGYRWYCWTRYMGYRWAWAWSCTWAWYWTCSMGT      | 25320 |
| Indonesia-88045 | WWMGCRTKYAMCCYCCCKRWGTGYRWYCWTRYMGYRWAWAWSCTWAWYWTCSAGKT     | 25320 |
| Indonesia-88065 | WWMGCRTKYAMCCYCCCKRWGTGYRWYCWTRYMGYRWAWAWSCTWAWYWTCSAGKT     | 25320 |
|                 | * .:* .* * .** * .:* * ** . . *** ..                         |       |
| Bhutan-09015    | AAWYRTRCYCSAKTRTATTWYRYGGGRKRWYWGRYAGRCTATRRGGRCSYGGARYTG    | 25380 |
| Bhutan-09024    | AAWYRTRCYCSAKTRTATTWYRYGGGRKRWYWGRYAGRCTATRRGGRCSYGGARYTG    | 25380 |
| Bhutan-09027    | AAWYRTRCYCSAKTRTATTWYRYGGGRKRWYWGRYAGRCTATRRGGRCSYGGARYTG    | 25380 |
| Bhutan-09030    | AAWYRTRCYCSAKTRTATTWYRYGGGRKRWYWGRYAGRCTATRRGGRCSYGGARYTG    | 25380 |
| Bhutan-09005    | GCWMRKRGTMSRKYAWGCGYTACCATRRRAWWATTRRCRRRYKGAGASCRSSCARRGTYR | 25380 |
| Indonesia-88035 | GCWMRKRGTMSRKYAWGCGYTACCATRRRAWWATTRRCRRRYKGAGASCRSSCARRGTYR | 25380 |
| Indonesia-88045 | GCWMRKRGTMSRKYAWGCGYTACCATRRRAWWATTRRCRRRYKGAGASCRSSCARRGTYR | 25380 |
| Indonesia-88065 | GCWMRKRGTMSRKYAWGCGYTACCATRRRAWWATTRRCRRRYKGAGASCRSSCARRGTYR | 25380 |
|                 | ..* *. * * . * * * * ..: . * .*                              |       |
| Bhutan-09015    | RMGAMWYGYRWGRMRCYACRSRYWCYMCWCRWCAKKTGYGTYGWRGYGRGSTCKCR     | 25440 |
| Bhutan-09024    | RMGAMWYGYRWGRMRCYACRSRYWCYMCWCRWCAKKTGYGTYGWRGYGRGSTCKCR     | 25440 |
| Bhutan-09027    | RMGAMWYGYRWGRMRCYACRSRYWCYMCWCRWCAKKTGYGTYGWRGYGRGSTCKCR     | 25440 |
| Bhutan-09030    | RMGAMWYGYRWGRMRCYACRSRYWCYMCWCRWCAKKTGYGTYGWRGYGRGSTCKCR     | 25440 |
| Bhutan-09005    | RMKMAACTRTRATGCGMTMTGCATWTTATTARAARKTYTTYKCYRARAYARSSYGTYG   | 25440 |
| Indonesia-88035 | RMKMAACTRTRATGCGMTMTGCATWTTATTARAARKTYTTYKCYRARAYARSSYGTYG   | 25440 |
| Indonesia-88045 | RMKMAACTRTRATGCGMTMTGCATWTTATTARAARKTYTTYKCYRARATARSSYGTYG   | 25440 |
| Indonesia-88065 | RMKMAACTRTRATGCGMTMTGCATWTTATTARAARKTYTTYKCYRARAYARSSYGTYG   | 25440 |
|                 | ** * * . * . * . * * .** .                                   |       |
| Bhutan-09015    | AYYCYRAMRCKKTRAYYRGCRMSTWYYYTGRRRRACRCRYWCCYSGYCWRGYRYGTC    | 25500 |
| Bhutan-09024    | AYYCYRAMRCKKTRAYYRGCRMSTWYYYTGRRRRACRCRYWCCYSGYCWRGYRYGTC    | 25500 |
| Bhutan-09027    | AYYCYRAMRCKKTRAYYRGCRMSTWYYYTGRRRRACRCRYWCCYSGYCWRGYRYGTC    | 25500 |
| Bhutan-09030    | AYYCYRAMRCKKTRAYYRGCRMSTWYYYTGRRRRACRCRYWCCYSGYCWRGYRYGTC    | 25500 |
| Bhutan-09005    | CCTYTTAGCGYTGGRTRRYAYCGKATYCTWRGARARYRYACKMYSSYSWRRYGTSYA    | 25500 |
| Indonesia-88035 | CCTYTTAGCGYTGGRTRRYAYCGKATYCTWRGARARYRYACKMYSSYSWRRYGTSYA    | 25500 |
| Indonesia-88045 | CCTYTTAGCGYTGGRTRRYAYCGKATYCTWRGARARYRYACKMYSSYSWRGTGTSYA    | 25500 |
| Indonesia-88065 | CCTYTTAGCGYTGGRTRRYAYCGKATYCTWRGARARYRYACKMYSSYSWRRYGTSYA    | 25500 |
|                 | . . . * .. * * * ** .** . .                                  |       |
| Bhutan-09015    | YMWGWTCSYAMTYKATARSARRGGCAITMTYAYCYRRKGRWYRKTACMYTYAYGGWWT   | 25560 |
| Bhutan-09024    | YMWGWTCSYAMTYKATARSARRGGCAITMTYAYCYRRKGRWYRKTACMYTYAYGGWWT   | 25560 |
| Bhutan-09027    | YMWGWTCSYAMTYKATARSARRGGCAITMTYAYCYRRKGRWYRKTACMYTYAYGGWWT   | 25560 |
| Bhutan-09030    | YMWGWTCSYAMTYKATARSARRGGCAITMTYAYCYRRKGRWYRKTACMYTYAYGGWWT   | 25560 |
| Bhutan-09005    | TAARWYTSTRACYTWTARSGGGRCTMYKCMCYCGGGRTTAGTYRAACYTMCARWART    | 25560 |
| Indonesia-88035 | TAARWYTSTRACYTWYWRSGGGRCTMYKCMCYCGGGRTTAGTYRAACYTMCARWARY    | 25560 |
| Indonesia-88045 | TAARWYTSTRACYTWYWRSGGGRCTMYKCMCYCGGGRTTAGTYRAACYTMCARWARY    | 25560 |
| Indonesia-88065 | TAARWYTSTRACYTATARSGGGRCTMYKCMCYCGGGRTTAGTYRAACYTMCARWART    | 25560 |
|                 | * * * . ** . * * * . * . *                                   |       |

|                 |                                                                                                                                                                                                                        |       |
|-----------------|------------------------------------------------------------------------------------------------------------------------------------------------------------------------------------------------------------------------|-------|
| Bhutan-09015    | RKRKYCTTRRWTYKRTAYRYRGMWTYGTRYRYATGKAKTTKYTAKTSRTSCCGMRRRYRM                                                                                                                                                           | 25620 |
| Bhutan-09024    | RKRKYCTTRRWTYKRTAYRYRGMWTYGTRYRYATGKAKTTKYTAKTSRTSCCGMRRRYRM                                                                                                                                                           | 25620 |
| Bhutan-09027    | RKRKYCTTRRWTYKRTAYRYRGMWTYGTRYRYATGKAKTTKYTAKTSRTSCCGMRRRYRM                                                                                                                                                           | 25620 |
| Bhutan-09030    | RKRKYCTTRRWTYKRTAYRYRGMWTYGTRYRYATGKAKTTKYTAKTSRTSCCGMRRRYRM                                                                                                                                                           | 25620 |
| Bhutan-09005    | RTAGCYCGARWWYGGAGYRYRCAWGCRCRYWKAGRKWCKTKWGSRYCYTRCGGACRC                                                                                                                                                              | 25620 |
| Indonesia-88035 | RTAGCYCGARWWYGGAGYRYRCAWGCRCRYWKAGRKWCKTKWGSRYCYTRCGGACRC                                                                                                                                                              | 25620 |
| Indonesia-88045 | RTAGCYCGARWWYGGAGYRYRCAWGCRCRYWKAGRKWCKTKWGSRYCYTRCGGACRC                                                                                                                                                              | 25620 |
| Indonesia-88065 | RTAGCYCGARWWYGGAGYRYRCAWGCRCRCRYWKAGRKWCKTKWGSRYCYTRCGGACRC                                                                                                                                                            | 25620 |
|                 | * .            ** *    :.*:*    *            ** ..    * * .    ** .            *                                                                                                                                       |       |
| Bhutan-09015    | CGGYTCAAWTGRCAMRSAYYAKMCARRAYGYSRYYYTTGTYTTGRRWRKYRTTGGCYRM                                                                                                                                                            | 25680 |
| Bhutan-09024    | CGGYTCAAWTGRCAMRSAYYAKMCARRAYGYSRYYYTTGTYTTGRRWRKYRTTGGCYRM                                                                                                                                                            | 25680 |
| Bhutan-09027    | CGGYTCAAWTGRCAMRSAYYAKMCARRAYGYSRYYYTTGTYTTGRRWRKYRTTGGCYRM                                                                                                                                                            | 25680 |
| Bhutan-09030    | CGGYTCAAWTGRCAMRSAYYAKMCARRAYGYSRYYYTTGTYTTGRRWRKYRTTGGCYRM                                                                                                                                                            | 25680 |
| Bhutan-09005    | YSGYCTMRAYGAYWGCRCSCYRGAATRYGRGTSTSRCTCYAKTYKGRWGTTRYRYRTGM                                                                                                                                                            | 25680 |
| Indonesia-88035 | YSGYCTMRAYGAYWGCRCSCYRGAATRYGRGTSTSRCTCYAKTYKGRWGTTRYRYRTGM                                                                                                                                                            | 25680 |
| Indonesia-88045 | YSGYCTMRAYGAYWGCRCSCYRGAATRYGRGTSTSRCTCYAKTYKGRWGTTRYRYRTGM                                                                                                                                                            | 25680 |
| Indonesia-88065 | YSGYCTMRAYGAYWGCRCSCYRGAATRYGRGTSTSRCTCYAKTYKGRWGTTRYRYRTGM                                                                                                                                                            | 25680 |
|                 | . *                            **.*                            * . . **                            ..                            ** .                            *                                                     |       |
| Bhutan-09015    | YKKGAYRWGRYAWYARGGKMRATAGKGGACARMGTRCWMRYRGRWRCATACTYRYAA                                                                                                                                                              | 25740 |
| Bhutan-09024    | YKKGAYRWGRYAWYARGGKMRATAGKGGACARMGTRCWMRYRGRWRCATACTYRYAA                                                                                                                                                              | 25740 |
| Bhutan-09027    | YKKGAYRWGRYAWYARGGKMRATAGKGGACARMGTRCWMRYRGRWRCATACTYRYAA                                                                                                                                                              | 25740 |
| Bhutan-09030    | YKKGAYRWGRYAWYARGGKMRATAGKGGACARMGTRCWMRYRGRWRCATACTYRYAA                                                                                                                                                              | 25740 |
| Bhutan-09005    | YKKGAYGATAGTGAYWGRATCAMCRRGRRTAARYRGTARYYCARTAYRWRAKYCGCRG                                                                                                                                                             | 25740 |
| Indonesia-88035 | YKKGAYGATAGTGAYWGRATCAMCRRGRRTAARYRGTARYYCARTAYRWRAKYCGCRG                                                                                                                                                             | 25740 |
| Indonesia-88045 | YKKGAYGATAGTGAYWGRATCAMCRRGRRTAARYRGTARYYCARTAYRWRAKYCGCRG                                                                                                                                                             | 25740 |
| Indonesia-88065 | YKKGAYGATAGTGAYWGRATCAMCRRGRRTAARYRGTARYYCARTAYRWRAKYCGCRG                                                                                                                                                             | 25740 |
|                 | **                            . . *                            ..                            .                            *                            ***                            ..*                            . |       |
| Bhutan-09015    | TAATCKRGAACKTAKTASARATGMGAGTARAMRAYMRCYYCARWRYTRYCCGRYTYRWM                                                                                                                                                            | 25800 |
| Bhutan-09024    | TAATCKRGAACKTAKTASARATGMGAGTARAMRAYMRCYYCAGTRYTRYCCGRYTYRWM                                                                                                                                                            | 25800 |
| Bhutan-09027    | TAATCKRGAACKTAKTASARATGMGAGTARAMRAYMRCYYCAGTRYTRYCCGRYTYRWM                                                                                                                                                            | 25800 |
| Bhutan-09030    | TAATCKRGAACKTAKTASARATGMGAGTARAMRAYMRCYYCAGTRYTRYCCGRYTYRWM                                                                                                                                                            | 25800 |
| Bhutan-09005    | CGRCYGAKTGGGYTWKYRCRGRWRCMCMWRRGCGYAAMCCYRAAGCGACAYAGTYRWC                                                                                                                                                             | 25800 |
| Indonesia-88035 | CGRCYGAKTGGGYTWKYRCRGRWRCMCMWRRGCGYAAMCCYRAAGCGACAYAGTYRWC                                                                                                                                                             | 25800 |
| Indonesia-88045 | CGRCYGAKTGGGYTWKYRCRGRWRCMCMWRRGCGYAAMCCYRAAGCGACAYAGTYRWC                                                                                                                                                             | 25800 |
| Indonesia-88065 | CGRCYGAKTGGGYTWKYRCRGRWRCMCMWRRGCGYAAMCCYRAAGCGACAYAGTYRWC                                                                                                                                                             | 25800 |
|                 | .                            ..                            *                            .                            *                            .*                                                                   |       |
| Bhutan-09015    | CGGGGAYATGKWCGRYRRCGYARAMASTKTMCYAYAGGAYARTMAYGYYYWTWMYK                                                                                                                                                               | 25860 |
| Bhutan-09024    | CGGGGAYATGKWCGRYRRCGYARAMASTKTMCYAYAGGAYARTMAYGYYYWTWMYK                                                                                                                                                               | 25860 |
| Bhutan-09027    | CGGGGAYATGKWCGRYRRCGYARAMASTKTMCYAYAGGAYARTMAYGYYYWTWMYKR                                                                                                                                                              | 25860 |
| Bhutan-09030    | CGGGGAYATGKWCGRYRRCGYARAMASTKTMCYAYAGGAYARTMAYGYYYWTWMYKR                                                                                                                                                              | 25860 |
| Bhutan-09005    | YKRRRWCRCWKGTAKACCGSSYRRCRSTSYKYWYCMTRAKMCRGCACRYCWCACACTGG                                                                                                                                                            | 25860 |
| Indonesia-88035 | YKRRRWCRCWKGTAKACCGSSYRRCRSTSYKYWYCMTRAKMCRGCACRYCWCACACTGG                                                                                                                                                            | 25860 |
| Indonesia-88045 | YKRRRWCRCWKGTAKACCGSSYRRCRSTSYKYWYCMTRAKMCRGCACRYCWCACACTGG                                                                                                                                                            | 25860 |
| Indonesia-88065 | YKRRRWCRCWKGTAKACCGSSYRRCRSTSYKYWYCMTRAKMCRGCACRYCWCACACTGG                                                                                                                                                            | 25860 |
|                 | .                            ..**                            :* *                            .                            .* ** *                                                                                      |       |
| Bhutan-09015    | TYTYTRMWYGTCKTACYCMRYKWYKCKYRGRKRAYARSYRRSARYRYSMKYRWCRCRW                                                                                                                                                             | 25920 |
| Bhutan-09024    | TYTYTRMWYGTCKTACYCMRYKWYKCKYRGRKRAYARSYRRSARYRYSMKYRWCRCRW                                                                                                                                                             | 25920 |
| Bhutan-09027    | TYTYTRMWYGTCKTACYCMRYKWYKCKYRGRKRAYARSYRRSARYRYSMKYRWCRCRW                                                                                                                                                             | 25920 |
| Bhutan-09030    | TYTYTRMWYGTCKTACYCMRYKWYKCKYRGRKRAYARSYRRSARYRYSMKYRWCRCRW                                                                                                                                                             | 25920 |

|                 |                                                              |       |
|-----------------|--------------------------------------------------------------|-------|
| Bhutan-09005    | WYWYWGCTCACTTCRYTYCRTGWYTTGTCTGKKARCGGGYAGGRMGYSMKYAWMWYRYW  | 25920 |
| Indonesia-88035 | WCWYWGCTCACTTCACTYCRTGWYTTGTCTGKKARCGGGYAGGRMGYSMKYAACTYRYW  | 25920 |
| Indonesia-88045 | WCWYWGCTCACTTCRYTYCRTGWYTTGTCTGKKARCGGGYAGGRMGYSMKYAWMWYRYW  | 25920 |
| Indonesia-88065 | WCWYWGCTCACTTCRYTYCRTGWYTTGTCTGKKARCGGGYAGGRMGYSMKYAWMWYRYW  | 25920 |
|                 | * . . * ** . * . * . *** * *                                 |       |
| Bhutan-09015    | GGGRYKRCRMRTYCYRTACGATARYTKYTKRYRWCCWGWARSYYYYTCYMWKCMSCSYR  | 25980 |
| Bhutan-09024    | GGGRYKRCRMRTYCYRTACGATARYTKYTKRYRWCCWGWARSYYYYTCYMWKCMSCSYR  | 25980 |
| Bhutan-09027    | GGGRYKRCRMRTYCYRTACGATARYTKYTKRYRWCCWGWARSYYYYTCYMWKCMSCSYR  | 25980 |
| Bhutan-09030    | GGGRYKRCRMRTYCYRTACGATARYTKYTKRYRWCCWGWARSYYYYTCYMWKCMSCSYR  | 25980 |
| Bhutan-09005    | KRRGYTAAAMRKTYYAWRYRTYRRYTGYYTACRWYWCARGSYTYWGCMMWKYMCTSCA   | 25980 |
| Indonesia-88035 | KRRGYTAAAMRKTYYAWRYRTYRRYTGYYTACRWYWCARGSYTYWGCMMWKYMCTSCA   | 25980 |
| Indonesia-88045 | KRRGYTAAAMRKTYYAWRYRTYRRYTGYYTACRWYWCARGSYTYWGCMMWKYMCTSCA   | 25980 |
| Indonesia-88065 | KRRGYTAAAMRKTYYATRYRTYRRYTGYYTACRWYWCARGSYTYWGCMMWKYMCTSCA   | 25980 |
|                 | * . . ** . * : ** * . ** * *** ** *** * *                    |       |
| Bhutan-09015    | RYWCYWGCMCATWATYTGRRRGCYCTAKYGYSTTMCARTSTYWYAYAAKYCAGRYR     | 26040 |
| Bhutan-09024    | RYWCYWGCMCATWWTYTGRRRGCYCTAKYGYSTTMCARTSTYWCAYAAKYCAGRYR     | 26040 |
| Bhutan-09027    | RYWCYWGCMCATWAWYTGRRRGCYCTAKYGYSTTMCARTSTYWYAYAAKYCAGRYR     | 26040 |
| Bhutan-09030    | RYWCYWGCMCATWATYTGRRRGCYCTAKYGYSTTMCARTSTYWYAYAAKYCAGRYR     | 26040 |
| Bhutan-09005    | AYTTACATAYGAAATYYRGRRAAYCCRTTRCTGCMYMRCTCYCTCRYCRKCCGRRCY    | 26040 |
| Indonesia-88035 | AYTTACATAYGAAATYYRGRRAAYCCRTTRCTGCMYMRCTCYCTCRYCRKCCGRRCY    | 26040 |
| Indonesia-88045 | AYTTACATAYGAAATYYRGRRAAYCCRTTRCTGCMYMRCTCYCTCRYCRKCCGRRCY    | 26040 |
| Indonesia-88065 | AYTTACATAYGAAATYYRGRRAAYCCRTTRCTGCMYMRCTCYCTCRCCRRCGRRCY     | 26040 |
|                 | * . . . : * ** ..* . . * . * . * . * *                       |       |
| Bhutan-09015    | AGAGGAGTTGACKSCYGKWTWYSKYGCYCGARKRAAYRCYTAYRRKAWYRSRTKWTSAYT | 26100 |
| Bhutan-09024    | AGAGGAGTTGACKSCYGKWTWYSKYGCYCGARKRAAYRCYTAYRRKAWYRSRTKWTSAYT | 26100 |
| Bhutan-09027    | AGAGGAGTTGACKSCYGKWTWYSKYGCYCGARKRAAYRCYTAYRATAWYRSRTKWTSAYT | 26100 |
| Bhutan-09030    | AGAGGAGTTGACKSCYGKWTWYSKYGCYCGARKRAAYRCYTAYRATAWYRSRTKWTSAYT | 26100 |
| Bhutan-09005    | ARCACGACYAWAKSYRGWVKYGGYKCYCTGWRKRRGTGMCYRTGGGWYACRWGWKYWY   | 26100 |
| Indonesia-88035 | ARCACGACYAWAKSYRGWVKYGGYKCYCTGWRKRRGTGMCYRTGGGWYACRWGWKYWY   | 26100 |
| Indonesia-88045 | ARCACGACCAWAKSYRGWVKYGGYKCYTRWRKRRGTGMCYRTGGGWYACRWGWKYWY    | 26100 |
| Indonesia-88065 | MRCACGACCAWAKSYRGWVKYGGYKCYCTGWRKRRGTGMCYRTGGGWYACRWGWKYWY   | 26100 |
|                 | . . . . ** * * . * . * . . . . ** . * . *                    |       |
| Bhutan-09015    | RKGRCKSYRYKKWSGRAASRRWRRTGGCARRAMWRKAMYRMCSSRRGMTWYRSKCCCTA  | 26160 |
| Bhutan-09024    | RKGRCKSYRYKKWSGRAASRRWRRTGGCARRAMWRKAMYRMCSSRRGMTWYRSKCCCTA  | 26160 |
| Bhutan-09027    | RKGRCKSYRYKKWSGRAASRRWRRTGGCARRAMWRKAMYRMCSSRRGMTWYRSKCCCTA  | 26160 |
| Bhutan-09030    | RKGRCKSYRYKKWSGRAASRRWRRTGGCARRAMWRKAMYRMCSSRRGMTWYRSKCCCTA  | 26160 |
| Bhutan-09005    | ATRGYKCYTRYTKASCRRTGGAWAAYGACRRRRCARKGMCAMMSGGTATWYACGTTCY   | 26160 |
| Indonesia-88035 | ATRGYKCYTRYTKASCRRTGGAWAATGAMRRRRCARKGMCAMMSGGTATWYACGTYSY   | 26160 |
| Indonesia-88045 | ATRGYKCYTRYTKASCRRTGGAWAATGACRRRRCARKGMCAMMSGGTATWYACGTYSY   | 26160 |
| Indonesia-88065 | ATRGYKCYTRYTKASCRRTGGAWAAYKACRRRRCARKGMCAMMSGGTATWYACGTTCY   | 26160 |
|                 | . * . * ** . * * : . * . ** * . * * ** . . . .               |       |
| Bhutan-09015    | KYCRATTCGRRYASGAYYMGYAKYRYMRGACRYCRRYCGRYYSKYGYKKSRRTGGCGTR  | 26220 |
| Bhutan-09024    | KYCRATTCGRRYASGAYYMGYAKYRYMRGACRYCRRYCGRYYSKYGYKKSRRTGGCGTR  | 26220 |
| Bhutan-09027    | KYCRATTCGRRYASGAYYMGYAKYRYMRGACRYCRRYCGRYYSKYGYKKSRRTGGCGTR  | 26220 |
| Bhutan-09030    | KYCRATTCGRRYASGAYYMGYAKYRYMRGACRYCRRYCGRYYSKYGYKKSRRTGGCGTR  | 26220 |
| Bhutan-09005    | KTARWWWYGGGTRCSMYMRTTKCAYARKTYRCSARTARGTCCCTCRCGKGARCASYRWG  | 26220 |
| Indonesia-88035 | KTARATTYRGGTRCSMYMRTTKCAYARKTYRCSARTARGTCCCTCRCGKGARCASYRWG  | 26220 |
| Indonesia-88045 | KTARATTYRGGTRCGMYMRTTKCAYARKTYRCSARTARGTCCCTCRCGKGARCASYRTG  | 26220 |
| Indonesia-88065 | KTARWWWYGGGTRCSMYMRTTKCAYARKTYRCSARTARGTCCCTCRCGKGARCASYRWG  | 26220 |



Bhutan-09027 YSAWMWYRATGWRRTMAYCGTTYCRARAKCYGYRARRWYTWWRWYRYKWASRRYRYYGAG 26580

Bhutan-09030 YSAWMWYRATGWRRTMAYCGTTYCRARAKCYGYRARRWYTWWRWYRYKWASRRYRYYGAG 26580

Bhutan-09005 CGGTMATGMCKTGCKCRTYRKYRYYRRRWGSTTYGGGRWCWWGATCGYKARSRGCRYTCWK 26580

Indonesia-88035 CGGTMATGMCKTGCKCRYRKYRYYRRRWGSTTYGGGRWCWWGATCGYKARSRGCRYTCWK 26580

Indonesia-88045 CGGTMATGMCKTGCKCRYRKYRYYRRRWGSTTYGGGRWCWWGATCGYKARSRGCRYTCWK 26580

Indonesia-88065 CGGTMATGMCKTGCKCRYRKYRYYRRRWGSTTYGGGRWCWWGATCGYKARSRGCRYTCWK 26580

.. \* . \* \* \* . \* . \*\* \* \*\* \*\* \*

Bhutan-09015 GYGRKRRYRGGYCRSTYWYCGYGYSCACWRTKCRRRRAYRRGYRKRTRGYWYATTCAG 26640

Bhutan-09024 GYGRKRRRGGYCRSTYWYCGYGYSCACWRTKCRRRRAYRRGYRKRTRGYWYATTCAG 26640

Bhutan-09027 GYGRKRRYRGGYCRSTYWYCGYGYSCACWRTKCRRRRAYRRGYRKRTRGYWYATTCAG 26640

Bhutan-09030 GYGRKRRYRGGYCRSTYWYCGYGYSCACWRTKCRRRRAYRRGYRKRTRGYWYATTCAG 26640

Bhutan-09005 KCTGKACRRAYTACYWYTYGYATSYGMMTACTTGAAMCRRSYTRCARCWYTGWYTG 26640

Indonesia-88035 KCTGKACRRGYTACYWCTRYATSYGMMTACTTGAAMCRRSYTRCARCTCTGWYTG 26640

Indonesia-88045 KCTGKACRRGYTACYWCTRYATSYGMMTACTTGAAMCRRSYTRCARCTCTGWYTG 26640

Indonesia-88065 KCTGKACRRAYTACYWCTGYATSYGMMTACTTGAAMCRRSYTRCARCTCTGWYTG 26640

\* . \* . \*\* \* . \* . \*\* . \*\* . \* : ..

Bhutan-09015 SSWWGKAYYRCAAWSRRYRWRWRKMKYRYKTRWRWYKCRYWSYWMSYAYSTYARAGRG 26700

Bhutan-09024 SSWWGKAYYRCAAWSRRYRWRWRKMKYRYKTRWRWYKCRYWSYWMSYAYSTYARAGRG 26700

Bhutan-09027 SSWWGKAYYRCAAWSRRYRWRWGTMKYRYKTRWRWYKCRYWSYWMSYAYSTYARAGRG 26700

Bhutan-09030 SSWWGKAYYRCAAWSRRYRWRWRKMKYRYKTRWRWYKCRYWSYWMSYAYSTYARAGRG 26700

Bhutan-09005 SSTTSKRTYASRGAGAACWAGAGTATTACCTWATGMYGYGTTSCAMGYGCGCYRAGRGR 26700

Indonesia-88035 SSTTSKRTYACAGAGAACWAGAGTATTACCTWATGMYGYGTTSCAMGYGCGCYRAGRGR 26700

Indonesia-88045 SSTTSKRTYACAGAGAACWAGAGTATTACCTWATGMYGYGTTSCAMGYGCGCYRAGRGR 26700

Indonesia-88065 SSTTSKRTYASRGAGAACWAGAGTATTACCTWATGMYGYGTTSCAMGYGCGCYRAGRGR 26700

\*\* . \* \* . . . \* . . . \* \* \* . \* . \* .

Bhutan-09015 TRYWCWYTKYRGRATKGYRKAWTYCRYRTWTGWRWRKRCYWTMTRRRRWATWYR 26760

Bhutan-09024 TRYWCWYTKYRGRATKGYRKAWTYCRRTWTGWRWRKRCYWTMTRRRRWATWYR 26760

Bhutan-09027 TRYWCWYTKYRGRATKGYRKAWTYCGCRTWTGWRWRKRCYWTMTRRRRWATWYR 26760

Bhutan-09030 TRYWCWYTKYRGRATKGYRKAWTYCRYATWTGWRWRKRCYWTMTRRRRWATWYR 26760

Bhutan-09005 YACCWYCYGGYRGGKRYTARGWAACYATGYWYRTRAGKAATTAMKKAAGTRTCCGG 26760

Indonesia-88035 YACCWYCYGGYRGGKRYTARGWAACYATGYWYRTRAGKAATTAMKKAAGTRYTCCGG 26760

Indonesia-88045 YACCWYCYGGYRGGKRYTARGWAACYATGTWYRTRAGKAATTAMKKAAGTRYTCCGG 26760

Indonesia-88065 YACCWYCYGGYRGGKRYTARGWAACYATGYWYRTRAGKAATTAMKKAAGTRTCCGG 26760

\* \* \* \* . \* \* \* : \* \* \* . : \* .

Bhutan-09015 YKTAMASYRKYKRCGAWTARRMMGGYRWRWYYYGTTKKGWKMWYMWRMAASRWYASGATK 26820

Bhutan-09024 YKTAMASYRKYKRCGAWTARRMMGGYRWRWYYYGTTKKGWKMWYMWRMAASRWYASGATK 26820

Bhutan-09027 YKTAMASYRKYKRCGAWTARRMMGGYRWRWYYYGTTKKGWKMWYMWRMAASRWYASGATK 26820

Bhutan-09030 YKTAMASYRKYKRCGAWTARRMMGGYRWRWYYYGTTKKGWKMWYMWRMAASRWYASGATK 26820

Bhutan-09005 YKACMCTGGTGSGRGAKRAAMCRA YGRWCCYKKTGRAGAACCARA AWC GTTWCKGCG 26820

Indonesia-88035 YKACMCTGGTGSGRGAKRAAMCRA YGRWCCYKKTGRAGAACCARA AWC GTTWCKGCG 26820

Indonesia-88045 YKACMCTGGTGSGRGAKRAAMCRA YGRWCCYKKTGRAGAACCARA AWC GTTWCKGCG 26820

Indonesia-88065 YKACMCTGGTGSGRGAKRAAMCRA YGRWCCYKKTGRAGAACCARA AWC GTTWCKGCG 26820

\*\* : . . . . \* . \* \* \* . . . . . . . . . .

Bhutan-09015 RYGRYSYRRSRYKYYKWTYRASKRMTTSTWTTCTTWRMCRACRMASCRTTYGTKMRYMRY 26880

Bhutan-09024 RYGRYSYRRSRYKYYKWTYRASKRMTTSTWTTCTTWRMCRACRMASCRTTYGTKMRYMRY 26880

Bhutan-09027 RYGRYSYRRSRYKYYKWTYRASKRMTTSTWTTCTTWRMCRACRMASCRTTYGTKMRYMRY 26880

Bhutan-09030 RYGRYSYRRSRYKYYKWTYRASKRMTTSTWTTCTTWRMCRACRMASCRTTYGTKMRYMRY 26880

Bhutan-09005 GTARTSCGGCRYGTGT YCAMSTRMGGACTAWMYKWGAYRRSAAAGMKKTATTMRYMAY 26880

Indonesia-88035 GTARTSCGGCRYGTGT YCAMSTRMGGACTAWMYKWGAYRRSAAAGMKKTATTMRYMAY 26880



Indonesia-88045 GTARTSCGGCRYGYTGTYCAMSTRMGGACTAWMYKWGAYRBSAARGMGKKTAYTMRYMAY 26880  
Indonesia-88065 GTARTSCGGCRYGYTGTYCAMSTRMGGACTAWMYKWGAYRBSAARGMGKKTATTMRYMAY 26880  
. \* \* . \*\* \* \* . \*\* : . : . \* \* . . . . \* \* \* \* \*

Bhutan-09015 YACCYGKRYARYRYKYMRKKRRRMMRSRYAMTSRARWCYKGSRGRRRWWYAATWRTKRR 26940  
Bhutan-09024 YACCYGTAYARYRYKYMRKKRRRMMRSRYAMTSRARWCYKGSRGARRWWYAATWRTKRR 26940  
Bhutan-09027 YACYYGKRYARYRYKYMRKKRRRATMGCYAMTSRARWCYKGSRGARRWWYAATWRTKRR 26940  
Bhutan-09030 YACCYGKRYARYRYKYMRKKRRRAMRSRYAMTSRARWCYKGSRGRRRWWYAATWRTKRR 26940  
Bhutan-09005 YRCCRTAYRATAYKCCGKTRARATCRSGYMAKSRRGAYYGRSGRGGRTACRMATGAKRG 26940  
Indonesia-88035 YRCCRTAYRATAYKCCGKTRARATCRSGYMAKSRRGAYYGRSGRGGRTACRMATGAKRG 26940  
Indonesia-88045 YRCCRTAYRATAYKCCGKTRARATCRSGYMAKSRRGAYYGRSGRGGRTACRMATGAKRG 26940  
Indonesia-88065 YRCCRTAYRATAYKCCGKTRARATCRSGYMAKSRRGAYYGRSGRGGRTACRMATGAKRG 26940  
\* . \* \*\* \* . \* . \*\* \* \* \* : : \*\*

Bhutan-09015 RMTWGARMTRTGMRGWTKYRWMGYTTCWCGWMYCYYYACRGTTYRWRWYTYAWMKRKYT 27000  
Bhutan-09024 RMTWGARMTRTGMRGWTKYRWMGYTTCWCGWMYCYYYACRGTTYRWRWYTYAWMKRKYT 27000  
Bhutan-09027 RMTWGARMATGMRGWTKYRWMGYTTCWCGWMYCYYYACRGTTYRWRWYTYAWMKRKYT 27000  
Bhutan-09030 RMTWGARMATGMRGWTKYRWMGYTTCWCGWMYCYYYACRGTTYRWRWYTYAWMKRKYT 27000  
Bhutan-09005 RCYARAAAARYGCGAAAYTTGAMKYYYCTYCWMYTYCCYRTGRKYCTAAATCTGACGATCC 27000  
Indonesia-88035 RCYARAAAARYGCGAAAYTTGAMKYYYSTYCWMYTYCCYRTGRKYCTAAATCTGACGATCC 27000  
Indonesia-88045 RCYARAAAARYGCGAAAYTTGAMKYYYSTYCWMYTYCCYRTGRKYCTAAATCTGACGATCC 27000  
Indonesia-88065 RCYARAAAARYGCGAAAYTTGAMKYYYCTYCWMYTYCCYRTGRKYCTAAATCTGACGATCC 27000  
\* . . . \* \* . \*\*\* \* . . . .

Bhutan-09015 RYATAKYRRTYMYTCMRYRYCSRGRARYYGCYRGYTKGGRAAARKCMGGYRSMWRCRWA 27060  
Bhutan-09024 RYATAKYRRTYMYTCMRYRYCSRGRARYYGCYRGYTKGGRAAARKCMGGYRSMWRCRWA 27060  
Bhutan-09027 RYATAKYRRTYMYTCMRYRYCSRGRARYYGCYRGYTKGGRAAARKCMGGYASAWRCRWA 27060  
Bhutan-09030 RYATAKYRRTYMYTCMRYRYCSRGRARYYGCYRGYTKGGRAAARKCMGGYRSAWRCRWA 27060  
Bhutan-09005 RYRWRGCCAACYMYTYAGTAYTSAAGGRYRMYRTTCKRKGCCRTYMRKTACATGGGTT 27060  
Indonesia-88035 RYRWRGCCAACYMYTYAGTAYTSAAGGRYRMYRTTCKRKGCCRTYMRKTACMTGGGTT 27060  
Indonesia-88045 RYRWRGCCAACYMYTYAGTAYTSAAGGRYRMYRTTCKRKGCCRTYMRKTACMTGGGTT 27060  
Indonesia-88065 RYRWRGCCAACYMYTYAGTAYTSAAGGRYRMYRTTCKRKGCCRTYMRKTACMTGGGTT 27060  
\*\* . . . \*\*\* \*\* \* . . . \* . : :

Bhutan-09015 YRYGAAWYRMTRRTYATTYWKRRAACYSSCRGRYYGCCWRRRGAYAYRGYGRSACKA 27120  
Bhutan-09024 YRYGAAWYRMTRRTYATTYWKRRAACYSSCRGRYYKYYWRRRGAYAYRGYGRSACKA 27120  
Bhutan-09027 YRYGAAWYRMTRRTYATTYWKRRAACYSSCRGRYYKYYWRRRGAYAYRGYGRSACKA 27120  
Bhutan-09030 YRYGAAWYRMTRRTYATTYWKRRAACYSSCRGRYYKYYWRRRGAYAYRGYGRSACKA 27120  
Bhutan-09005 YGCGAGATYAMKGRYYRAYCCTGRGRCGTGTRRGYYGCCAGAGRWCRYRKCRRSTTTT 27120  
Indonesia-88035 YGCGAGATYAMKGRYYRAYCCTGRGRCGTGTRRGYYGCCAGAGRWCRYRKCRRSTTTT 27120  
Indonesia-88045 YGCGAGATYAMKGRYYRAYCCTGRGRCGTGTRRGYYGCCAGAGRWCRYRKCRRSTTTT 27120  
Indonesia-88065 YGCGAGATYAMKGRYYRAYCCTGRGRCGTGTRRGYYGCCAGAGRWCRYRKCRRSTTTT 27120  
\* : . \* \* . \* \* : \* . . . \* \*\* \*\* \* \* : .

Bhutan-09015 GGARKRKASKMCYAYAKGYWGTAAARARCCKTSYAYYAYRGWTAAYMCCAYMYTCARTYY 27180  
Bhutan-09024 GGARKRKASKMCYAYAKGYWGTAAARARCCKTSYAYYAYRGWTAAYMCCAYMYTCARTYY 27180  
Bhutan-09027 GGARKRKASKMCYAYAKGYWGTAAARARCCKTSYAYYAYRGWTAAYMCCAYMYTCARTYY 27180  
Bhutan-09030 GGARKRKASKMCYAYAKGYWGTAAARARCCKTSYAYYAYRGWTAAYMCCAYMYTCARTYY 27180  
Bhutan-09005 RRRGTGTCGGCYCYRKTWWWTRAGRRCCKYGYRTRYGRAYMRCYAYAMYAYTTAWYY 27180  
Indonesia-88035 AAGGTGTCGGCYCYRKTWWWTRAGRRCCKYGYRTRYGRAYMRCYAYAMYAYTTAWCY 27180  
Indonesia-88045 AAGGTGTCGGCYCYRKTWWWTRAGRRCCKYGYRTRYGRAYMRCYAYAMYAYTTAWCY 27180  
Indonesia-88065 RRRGTGTCGGCYCYRKTWWWTRAGRRCCKYGYRTRYGRAYMRCYAYAMYAYTTAWYY 27180  
. . . \* \* \* . \* \* . \* \* . \* \* \* : \*

Bhutan-09015 RWYMSGYYRTRCTTRMYRTARYRKRRIYWCRYATSYCSRRRGKAYYRKRTRGYWWYAYR 27240  
 Bhutan-09024 RWYMSGYYRTRCTTRMYRTARYRKRRIYWCRYATSYCSRRRGKAYYRKRTRGYWWYAYR 27240  
 Bhutan-09027 RWYMSGYYRTRCTTRMYRTARYRKRRIYWCRYATSYCSRRRGKAYYRKRTRGYWWYAYR 27240  
 Bhutan-09030 RWYMSGYYRTRCTTRMYRTARYRKRRIYWCRYATSYCSRRRGKAYYRKRTRGYWWYAYR 27240  
 Bhutan-09005 ATTMCKRCRCRCRTYRACRYRAYRGRGGCYWCGCTCGYYSARRGTYYGKWATYTATGYA 27240  
 Indonesia-88035 ATTMCKRCRCRCRTYRACRYRAYRGRGGCYWCGCTCGYYSARRGTYYGKWATYTATGYA 27240  
 Indonesia-88045 ATTMCKRCRCRCRTYRACRYRAYRGRGGCYWCGCTCGYYSARRGTYYGKWATYTATGYA 27240  
 Indonesia-88065 ATTMCKRCRCRCRTYRACRYRAYRGRGGCYWCGCTCGYYSARRGTYYGKWATYTATGYA 27240

\* . \* \* . \* \* \* \* \* \* : . . \* \* . : \* \* \* \* \* . \*

Bhutan-09015 SRRYYKRSKYRCRTACMRSYAARMRMKYGTAYMYMSWSYCGRRKAGYRWYTYGKWKGY 27300  
 Bhutan-09024 SRRYYKRSKYRCRTACMRSYAARMRMKYGTAYMYMSWSYCGRRKAGYRWYTYGKWKGY 27300  
 Bhutan-09027 SRRYYKRSKYRCRTACMRSYAARMRMKYGTAYMYMSWSYCGRRKAGYRWYTYGKWKGY 27300  
 Bhutan-09030 SRRYYKRSKYRCRTACMRSYAARMRMKYGTAYMYMSWSYCGRRKAGYRWYTYGKWKGY 27300  
 Bhutan-09005 CAGTCGGGKYAYRTRMARSYMGGMGCCCTSYRCMYMGTGTAKGGGMRACRYRRTTCT 27300  
 Indonesia-88035 CAGTCGGGKYAYRTRMARSYMGGMGCCCTSYRCMYMGTGTAKGGGMRACRYRRTTCT 27300  
 Indonesia-88045 CAGTCGGGKYAYRTRMARSYMGGMGCCCTSYRCMYMGTGTAKGGGMRACRYRRTTCT 27300  
 Indonesia-88065 CAGTCGGGKYAYRTRMARSYMGGMGCCCTSYRCMYMGTGTAKGGGMRACRYRRTTCT 27300

. \* \* . \* \* \* . \* \* . \* \* . \* \* . \* \* . \*

Bhutan-09015 GTGAMTAGGCTGWRSRWYKAWYGTSAWWCSYGCTYKGWRRARKAYCYYYTGCCGYG 27360  
 Bhutan-09024 GTGAMTAGGCTGWRSRWYKAWYGTSAWWCSYGCTYKGWRRARKAYCYYYTGCCGYG 27360  
 Bhutan-09027 GTGAMTAGGCTGWRSRWYKAWYKYSAWWCSYGCTYKGWRRARKAYCYYYTGCCGYG 27360  
 Bhutan-09030 GTGAMTAGGCTGWRSRWYKAWYKYSAWWCSYGCTYKGWRRARKAYCYYYTGCCGYG 27360  
 Bhutan-09005 ACRWAKGTAMYRTRCGYGTGTTKCGMTATCCRYMKCRTAWRWGWYYYTYCYCGMTGTT 27360  
 Indonesia-88035 AYRWAKGTAMYRTRCGYGTGTTKCGMTATCCRYAGCRTAWRWGWYYYTYCYCGMTATT 27360  
 Indonesia-88045 AYRWAKGTAMYRTRCGYGTGTTKCGMTATCCRYAGCRTAWRWGWYYYTYCYCGMTATT 27360  
 Indonesia-88065 AYRWAKGTACTRTRCGYGTGTTKCGMTATCCRYMKCRTAWRWGWYYYTYCYCGMTGTT 27360

. . . \* . \* \* : . . . \* \* \* . \* \* \* . \*

Bhutan-09015 YGTAKTYTAGTSRYTSWTAACSRKRGYMYCACGATRCCGTTTCYKAWYYYRYTRKGY 27420  
 Bhutan-09024 YGTAKTYTAGTSRYTSWTAACSRKRGYMYCACGATRCCGTTTCYKAWYYYRYTRKGY 27420  
 Bhutan-09027 YGTAKTYTAGTSRYTSWTAACSRKRGYMYCACGATRCCGTTTCYKAWYYYRYTRKGY 27420  
 Bhutan-09030 YGTAKTYTAGTSRYTSWTAACSRKRGYMYCACGATRCCGTTTCYKAWYYYRYTRKGY 27420  
 Bhutan-09005 CGTWTKWAGCKSGTCCTWWRSCAWTRRRYTMCMRYRRKGTYYKYYKCTTCCGTYRKAY 27420  
 Indonesia-88035 CGTWTKWAGCKSGTCCTWWRSCAWTRRRYTMCMRYRRKGTYYKYYKCTTCCGTYRKAY 27420  
 Indonesia-88045 CGTWTKWAGCKSGTCCTWWRSCAWTRRRYTMCMRYRRKGTYYKYYKCTTCCGTYRKAY 27420  
 Indonesia-88065 CSWWTKWAGCKSGTCCTWWRSCAWTRRRYTMCMRYRRKGTYYKYYKCTTCCGTYRKAY 27420

. . . : . . \* . . . \* \* . \* \* . \* \* . \* \* . \*

Bhutan-09015 ARTGKRWKYCTTYTGSMKWRGYGYCYKGYGTAYGWAYMRGRTACCGYTYAGRKTGTR 27480  
 Bhutan-09024 ARTGKRWKYCTTYTGSMKWRGYGYCYKGYGTAYGWAYMRGRTACCGYTYAGRKTGTR 27480  
 Bhutan-09027 ARTGKRWKYCTTYTGSMKWRGYGYCYKGYGTAYGWAYMRGRTACCGYTYAGRKTGTR 27480  
 Bhutan-09030 ARTGKRWKYCTTYTGSMKWRGYGYCYKGYGTAYGWAYMRGRTACCGYTYAGRKTGTR 27480  
 Bhutan-09005 RAWRTGATYCKTWSARTWARCRYRGTGCRWATRAWTCARGGYSYRRTYYWRRGWRTG 27480  
 Indonesia-88035 RATGTGATYCKTWSARTWARCRYRGTGCRWRTAAWTCARGGYSYRRTYYWRRGWRCG 27480  
 Indonesia-88045 RATGTGATYCKTWSARTWARCRYRGTGCRWRTAAWTCARGGYSYRRTYYWRRGWRCG 27480  
 Indonesia-88065 RAWRTGATYCKTWSARTWARCRYRGTGCRWATRAWTCARGGYSYRRTYYWRRGWRTG 27480

. . \* . \* \* . . \* \* . \* \* . \*

Bhutan-09015 RWYRTWKASGCMTARTAYWTKYYCAGYCRMAYYYMCMASMCRTTRATCASTCYTRTCAR 27540  
 Bhutan-09024 RWYRTWKASGCMTARTAYWTKYYCAGYCRMAYYYMCMASMCRTTRATCASTCYTRTCAR 27540  
 Bhutan-09027 RWYRTWKASGCMTARTAYWTKYYCAGYCRMAYYYMCMASMCRTTRATCASTCYTRTCAR 27540  
 Bhutan-09030 RWYRTWKASGCMTARTAYWTKYYCAGYCRMAYYYMCMASMCRTTRATCASTCYTRTCAR 27540

Bhutan-09005 RATAYWKRCATAYMGYRRTTYKYCMGGTYAMATCTACMMCYMAAAARATYMSYTTKRYRYRA 27540  
Indonesia-88035 RATAYWKRSATAYMGYRRTTYKYCMGRTYAMATCTAMMMCYMAAAARRKYSYTTKRYRYRA 27540  
Indonesia-88045 RATAYWKRSATAYMGYRRTTYKYCMGRTYAMATCTAMMMCYMAAAARRKYSYTTKRYRYRA 27540  
Indonesia-88065 RATAYWKRCATAYMGYRRTTYKYCMGGTYAMTTCTACMMCYMAAAARATYMSYTTKRYRYRA 27540  
\* \*\* .. \*\* . \*: \* . \* . : \* . \* . \*

Bhutan-09015 GTGWYTTMYRYCCAYSARKKCATTRWARYTAYRCYKYRRTYCRCATATGSYRYWKKRK 27600  
Bhutan-09024 GTGWYTTMYRYCCAYSARKKCATTRWARYTAYRCYKYRRTYCRCATATGSYRYWKKRK 27600  
Bhutan-09027 GTGWYTTMYRYCCAYSARKKCATTRWARYTAYRCYKYRRTYCRCATATGSYRYWKKRK 27600  
Bhutan-09030 GTGWYTTMYRYCCAYSARKKCATTRWARYTAYRCYKYRRTYCRCATATGSYRYWKKRK 27600  
Bhutan-09005 AYAWTKWMYGYYSYWTSARTGYRYGWRRCKRYRMCYTYRWTYGMRCAMWACYACCKTTAK 27600  
Indonesia-88035 ATAWTKWMYGYYSYWTSARTGCRYGWRRCKRYGCCYTYRWTYGMRCAMWACYACCKTTAK 27600  
Indonesia-88045 ATAWTKWMYGYYSYWTSARTGCRYGWRRCKRYGCCYTYRWTYGMRCAMWACYACCKTTAK 27600  
Indonesia-88065 AYAWTKWMYGYYSYWTSARTGCRYGWRRCKRYRMCYTYRWTYGMRCAMWACYACCKTTAK 27600  
. . \* . \* \* . \* \* . \* \* . \* \* \* \* \* \* \* \* \* \* \* \* \* \* \* \* \* \*

Bhutan-09015 WRRARCYMTRRTMRYRGRMGYWGTRWRMGCAWWGGKCRAYYAAGGAMAAAGYTRAW 27660  
Bhutan-09024 WRRARCYMTRRTMRYGGRMGYWGTRWRMGCAWWGGKCGAYYAAGGAMAAAGYTRAW 27660  
Bhutan-09027 WRRARCYMTRRTMRYGGRMGYWGTRWRMGCAWWGGKCRAYYAAGGAMAAAGYTRAW 27660  
Bhutan-09030 WRRARCYMTRRTMRYRGRMGYWGTRWRMGCAWWGGKCRAYYAAGGAMAAAGYTRAW 27660  
Bhutan-09005 WRRARYTCCARTACGSAMRYARAAWRCRSYRTWARKKYGRYCRTRKRMTAGATCYARA 27660  
Indonesia-88035 WRAMRYTCCAAAYCACGSAMRYARAAWRMRSYATWARKKYGRYCRTRKRMTWRATCYARA 27660  
Indonesia-88045 WRAMRYTCCAAAYCACGSAMRYARAAWRMRSYATWARKKYGRYCRTRKRMTWRATCYARA 27660  
Indonesia-88065 WRRARYTCCARTACGSAMRYARAAWRCRSYRTWARKKYGRYCRTRKRMTAGATCYARA 27660  
\*\* \* . \* \* : \*\* . . \* \* : \* : .

Bhutan-09015 GAWWWMRAMMAMKAGTRTTCSAYTGACTYKYGMYRARYRRGCATYYGYASYTTKGYSKC 27720  
Bhutan-09024 GAWWWMRAMMAMKAGTRTTCSAYTGACTYKYGMYRARYRRGCATYYGYASYTTKGYSKC 27720  
Bhutan-09027 GAWWWMRAMMAMKAGTRTTCSAYTGACTYKYGMYRARYRRGCATYYGYASYTTKGYSKC 27720  
Bhutan-09030 GAWWWMRAMMAMKAGTRTTCSAYTGACTYKYGMYRARYRRGCATYYGYASYTTKGYSKC 27720  
Bhutan-09005 RATTACARWACMGTCYRKYYGRYCAMGYKYRMTGTRRAYAGKYGKCYGTMSYYYWKCOTG 27720  
Indonesia-88035 GMWWCARWACMGTCYRKYYGRYCAMGYKYRMTGTRRAYAGKYGKCYGTMSYYYWKCOTG 27720  
Indonesia-88045 GMWWCARWACMGTCYRKYYGRYCAMGYKYRMTGTRRAYAGKYGKCYGTMSYYYWKCOTG 27720  
Indonesia-88065 GATTACARWACMGTCYRKYYGRYCAMGYKYRMTGTRRAYAGKYGKCYGTMSYYYWKCOTG 27720  
\* . \* : \* . \* . \* \* \* \* \* \* \* \* \* \* \* \* \* \* \* \* \* \*

Bhutan-09015 RRRRARRTYKSWRMYCKMAKYATGMATMYAATAGRYRGYTGCSYRRWCSSACKYASA 27780  
Bhutan-09024 RRRRARRTYKSWRMYCKMAKYATGMATMYAATAGRYRGYTGCSYRRWCSSACKYAGA 27780  
Bhutan-09027 RRRRARRTYKSWRMYCKMAKYATGMATMYAATAGRYRGYTGCSYRRWCSSACTTAGA 27780  
Bhutan-09030 RRRRARRTYKSWRMYCKMAKYATGMATMYAATAGRYRGYTGCSYRRWCSSACTTASA 27780  
Bhutan-09005 RRGGRGAYCTGARACCYKACRTCRYKAAWCCGCATRRYRCTYRYGSCARGACCCTTGSW 27780  
Indonesia-88035 RRGGRGAYCTGARACCYKACRTCRYKAAWCCGCATRRYRCTYRYGSCARGACCCTTGSW 27780  
Indonesia-88045 RRGGRGAYCTGARACCYKACRTCRYKAAWCCGCATRRYRCTYRYGSCARGACCCTTGSW 27780  
Indonesia-88065 RRGGRGAYCTGARACCYKACRTCRYKAAWCCGCATRRYRCTYRYGSCARGACCCTTGSW 27780  
\*\* .. \* \* . . . . . : \* \* \* \* \* \* \* \* \* \* \* \* \* \* \* \* \* \*

Bhutan-09015 YGAAAYCRRKYMGRGRATGYRGATMAGRRYRGRTYARKYRYKATCKRYTTCKAYYAAAY 27840  
Bhutan-09024 TGRAAYCAGKYMGRGRATGYRGATMAGRRYRGRTYARKYRYKATCKRYTTCKAYYAAAY 27840  
Bhutan-09027 TGRAAYCRRKYMGRGRATGYRGATMAGRRYRGRTYARKYRYKATCKRYTTCKAYYAAAY 27840  
Bhutan-09030 YGAAAYCAGKYMGRGRATGYRGATMAGRRYRGRTYARKYRYKATCKRYTTCKAYYAAAY 27840  
Bhutan-09005 CAGMRTTAGRGCCRKAKGRGSTARWKAGARATCRYYRAGYAYTWWMGKYKTTMTCYRWY 27840  
Indonesia-88035 CAGMRTTAGRGCCRKAKGRGSTARWKAGARATCRYYRAGYAYTWWMGKYKTTMTCYRWY 27840  
Indonesia-88045 CAGMRTTAGRGCCRKAKGRGSTARWKAGARATCRYYRAGYAYTWWMGKYKTTMTCYRWY 27840  
Indonesia-88065 CAGMRTTAGRGCCRKAKGRGSTARWKAGARATCRYYRAGYAYTWWMGKYKTTMTCYRWY 27840

. . . \* . . . \* \* \* \* . : \* . . \* \*

Bhutan-09015 YRYMRYRRYRRWMKYRYRKRGRKRAYYTKMYGAAGYYGYTYMYYYGMWRYYYRTWTKSYT 27900  
 Bhutan-09024 YRYMRYRGYRRWMKYRYRKRGRKRAYYTKMYGAAGYYGYTYMYYYGMWRYYYRTWTKSYT 27900  
 Bhutan-09027 YRYMRYRGYRRWMKTRYRKRGRKRAYYTKMYGAAGYYGYTYMYYYGMWRYYYRTWTKSYT 27900  
 Bhutan-09030 YRYMRYRRYRRWMKYRYRKRGRKRAYYTKMYGAAGYYGYTYMYYYGMWRYYYRTWTKSYT 27900  
 Bhutan-09005 TRYCRTAGYARACGYRYTAKGRGATTYCKAYYARMATCKWTATCCAATKTKCAKWTATY 27900  
 Indonesia-88035 TRYCRTAGYARACGYRYTAKGRGAYYCKAYYARMAYCKWTATCCAATKTKCAKWTATY 27900  
 Indonesia-88045 TRYCGTAGYARACGYRYTAKGRGAYYCKAYYARMAYCKWTATCCAATKTKCAKWTATY 27900  
 Indonesia-88065 TRYCRTAGYARACGYRYTAKGRGATTYCKAYYARMATCKWTATCCAATKTKCAKWTATY 27900  
 \* \* \* \* \* : \* \* \* \* . . . : . \* ..

Bhutan-09015 YTGGGYTTYGTWRGGTYAKCYRYKAMKRSYYTKMCYCSMCYWMRCRYAYTMATAYGMWA 27960  
 Bhutan-09024 YTGGGYTTYGTWRSGTYAKCYRYKAMKRSYYTKMCYCSMCYWMRCRYAYTMATAYGMWA 27960  
 Bhutan-09027 YTGGGYTTYGTWRSGTYAKCYRYKAMKRSYYTKMCYCSMCYWMRCRYAYTMATAYGMWA 27960  
 Bhutan-09030 YTGGGYTTYGTWRSGTYAKCYRYKAMKRSYYTKMCYCSMCYWMRCRYAYTMATAYGMWA 27960  
 Bhutan-09005 YCSRSTCYTRYWGGCKYRGSTGYKGSKGCTYYTCGYTGCCYCAAAYRYTCTCMWYRCRMWM 27960  
 Indonesia-88035 YCSRSTCYTRYWGGCKYRGSTGYKGSKGCTCYTCGYTGCCYCAAAYRYTCTCMWYRCRMWM 27960  
 Indonesia-88045 YCSRSTCYTRYWGGCKYRGSTGYKGSKGCTCYTCGYTGCCYCAAAYRYTCTCMWYRCGMWM 27960  
 Indonesia-88065 YCSRSTCYTRYWGGCKYRGSTGYKGSKGCTYYTCGYTGCCYCAAAYRYTCTCMWYRCRMWM 27960  
 \* . \* . \* . \* \* . \* . \* . \* \* . \* \* \*

Bhutan-09015 YGTRWKGKCKYYGWSKTGACACGRKMTCCRGCCRSYRWSYYSRYGMRYWTYRKYTAYY 28020  
 Bhutan-09024 YGTRWKGKCKYYGWSKTGACACGRKMTCCRGCCRSYRWSYYSRYGMRYWTYRKYTAYY 28020  
 Bhutan-09027 YGTRWKGKCKYYGWSKTGACACGRKMTCCRGCCRSYRWSYYSRYGMRYWTYRKYTAYY 28020  
 Bhutan-09030 YGTRWKGKCKYYGWSKTGACACGRKMTCCRGCCRSYRWSYYSRYGMRYWTYRKYTAYY 28020  
 Bhutan-09005 TKYRASKACKCTRWGKYKTCGKYAGTACYRKRKYAACTAWSCCGGCKARYWYCGGYKMTT 28020  
 Indonesia-88035 TKYRASKACKCTRWGKYKTCGKYAGTACYRKRKYAACTAWSCCGGCKARYWYCGGYKMTT 28020  
 Indonesia-88045 TKYRASKACKCTRWGKYKTCGKYAGTACYRKRKYAACTAWSCCGGCKARYWYCGGYKMTT 28020  
 Indonesia-88065 TKYRASKACKCTRWGKYKTCGKYAGTACYRKRKYAACTAWSCCGGCKARYWYCGGYKMTT 28020  
 \* . \* \* \* \* . . . \* \* . \* \* . \* \* \* \* \*

Bhutan-09015 MTYRTRRYTYTKMYRSRWTCYCAAATGRGACGYMKCGAYTYRACYRSGTGYSRARGA 28080  
 Bhutan-09024 MTYRTRRYTYTKMYRSRWTCYCAAATGRGACGYMKCGAYTYRACYRSGTGYSRARGA 28080  
 Bhutan-09027 MTYRTRRYTYTKMYRSRWTCYCAAATGRGACGYMKCGAYTYRACYRSGTGYSRARGA 28080  
 Bhutan-09030 MTYRTRRYTYTKMYRSRWTCYCAAATGRGACGYMKCGAYTYRACYRSGTGYSRARGA 28080  
 Bhutan-09005 AYYGKAAAYGMWGCCASRWGATYGGGWSRSWTKCCTTRRTTWTGMTCGGRYKSYGGMRKW 28080  
 Indonesia-88035 AYYGKAAAYGMWGCCASRWGATYGGGWSRSWTKCCTTRRTTWTGMTCGGRYKSYGGMRKW 28080  
 Indonesia-88045 AYYGKAAAYGMWGCCASRWGATYGGGWSRSWTKCCTTRRTTWTGMTCGGRYKSYGGMRKW 28080  
 Indonesia-88065 AYYGKAAAYGMWGCCASRWGATYGGGWSRSWTKCCTTRRTTWTGMTCGGRYKSYGGMRKW 28080  
 \* . \* . \* \* . . . \* . . . \* \*

Bhutan-09015 MRTYSWTKKYRYCMRCATRCRASYRRTCGKACRRRTRKWYWRCCGRYRGTWAKYAWWT 28140  
 Bhutan-09024 MRTYSWTKKYRYCMRCATRCRASYRRTCGKACRRRTRKWYWRCCGRYRGTWAKYAWWT 28140  
 Bhutan-09027 MRTYSWTKKYRYCMRCATRCRASYRRTCGKACRRRTRKWYWRCCGRYRGTWAKYAWWT 28140  
 Bhutan-09030 MRTYSWTKKYRYCMRCATRCRASYRRTCGKACRRRTRKWYWRCCGAYRGTWAKYAWWT 28140  
 Bhutan-09005 CAWTSAYTRYRYCGTCYRYAWGTAAMMRGRYRGGYGGAYWRYRGGYAKKWKGYRTAW 28140  
 Indonesia-88035 CAWTSAYTRYRYCGTCYRYAWGTAAMMRGRYRGGYGGAYWRYRGGYAKKWKGYRTAW 28140  
 Indonesia-88045 CAWTSAYTRYRYCGTCYRYAWGTAAMMRGRYRGGYGGAYWRYRGGYAKKWKGYRTAW 28140  
 Indonesia-88065 CAWTSAYTRYRYCGTCYRYAWGTAAMMRGRYRGGYGGAYWRYRGGYAKKWKGYRTAW 28140  
 \* . : \* \* \* . \* . \* \* \* \* \* \* \* \*

Bhutan-09015 MCSCGRMASSTRRTCGCRWYWRGTMKCYMKWACGACTATAAYGYSCTTRRTCTCMATRYT 28200  
 Bhutan-09024 MCSCGRMASSTRRTCGCRWYWRGTMKCYMKWACGACTATAAYGYSCTTRRTCTCMATRYT 28200

Bhutan-09027 MSCSGRMASSTRRTCGCRWYWRGTMKCYMKWWACGACTATAYGYSCTTRRTCTCMATRYT 28200  
 Bhutan-09030 MSCSGRMASSTRRTCGCRWYWRGTMKCYMKWWACGACTATAYGYSCTTRRTCTCMATRYT 28200  
 Bhutan-09005 MSCYRGMSSYGAWMKSAATTRS YMTYYAKWWR YRTGCCWRTRYCMCAAAAAMKYAGWAYY 28200  
 Indonesia-88035 MSCSGRMSSYGAWCKSAATTRS YMTYYAKWWR YRTGCCWRTRYCMCAAAAAMKYAGWAYY 28200  
 Indonesia-88045 MSCSGRMSSYGAWCKSAATTRS YMTYYAKWWR YRTGCCWRTRYCMCAAAAAMKYAGWAYY 28200  
 Indonesia-88065 MSCYRGMSSYGAWMKSAATTRS YMTYYAKWWR YRTGCCWRTRYCMCAAAAAMKYAGWAYY 28200  
 \*.. \* \*\* . \*. \* . \* \*\*\* : . \*. : : . . \*

Bhutan-09015 YYARCATRGAYWKRYYGCRRTGTRTWSYGYCSKKATGYCKRRWYYSWAYSYRRYAKAAA 28260  
 Bhutan-09024 YYARCATRGAYWKRYYGCRRTGTRTWSYGYCSKKATGYCKRRWYYSWAYSYRRYAKAAA 28260  
 Bhutan-09027 YYARCATRGAYWKRYYGCRRTGTRTWSYGYCSKKATGYCKRRWYYSWAYSYRRYAKAAA 28260  
 Bhutan-09030 YYARCATRGAYWKRYYGCRRTGTRTWSYGYCSKKATGYCKRRWYYSWAYSYRRYAKAAA 28260  
 Bhutan-09005 TYTAAWWATGTWGRCTYGYSGGYAGTAYTYCTKMATTMGRGTTCSAWYCYGGTRTWT 28260  
 Indonesia-88035 TYTAAWWATGTWGRCTYGYSGGYAGTAYTYCTKMATTMGRGTTCSAWYCYGGTRTWT 28260  
 Indonesia-88045 TYTAAWWATGTWGRCTYGYSGGYAGTAYTYCTKMATTMGRGTTCSAWYCYGGTRTWT 28260  
 Indonesia-88065 TYTAAWWATGTWGRCTYGYSGGYAGTAYTYCTKMATTMGRGTTCSAWYCYGGTRTWT 28260  
 \*: . . \* \* . . . \* ..\* : \* \* \* . \* . :

Bhutan-09015 YWYCTGMCGYRSKCWWTRTRTCWYSYRSQYRTRMCRKRAGTTSYWKAGWMRYYYTKGT 28320  
 Bhutan-09024 YWYCTRMCGYRSKCWWTRTRTCWYSYRSQYRTRMCRKRAGTTSYWKAGWMRYYYTKGT 28320  
 Bhutan-09027 YWYCTGMCGYRSKCWWTRTRTCWYSYRSQYRTRMCRKRAGTTSYWKAGWMRYYYTKGT 28320  
 Bhutan-09030 YWYCWGMCYRSKCWWTRTRTCWYSYRSQYRTRMCRKRAGTTSYWKAGWMRYYYTKGT 28320  
 Bhutan-09005 TYCYTGAYKTASGSTAYAKAKYTTSYACCKTAYACSGTRGAWYSTWTGTSFCRCTPKTRY 28320  
 Indonesia-88035 TYCYTGAYKTASGSTAYAKAKYTTSYACCKTAYACSGTRGAWYSTWTGTSFCRCTPKTRY 28320  
 Indonesia-88045 TYCYTGAYKTASGSTAYAKAKYTTSYACCKTAYACSGTRGAWYSTWTGTSFCRCTPKTRY 28320  
 Indonesia-88065 TYCYTGAYKTASGSTAYAKAKYTTSYACCKTAYACSGTRGAWYSTWTGTSFCRCTPKTRY 28320  
 : \* . . . \*\* . \* . . \* \* : . \* ..

Bhutan-09015 TRYKWRWRYKAYYWYATMRTTTKARRTRSYCWRRAMACGTYYYRGRRTAWGRGCCCKR 28380  
 Bhutan-09024 TRYKWRWRYKAYYWYATMRTTTKARRTRSYCWRRAMACGTYYYRGRRTAWGRGCCCKR 28380  
 Bhutan-09027 KRYKWRWRYKAYYWYATMRTTTKARRTRSYCWRRAMACGTYYYRGRRTAWGRGCCCKR 28380  
 Bhutan-09030 KRYKWRWRYKAYYWYATMRTTTKARRTRSYCWRRAMACGTYYYRGRRTAWGRGCCCKR 28380  
 Bhutan-09005 TRYCGTWGYSGCC TACYCYCAYKYTRGRWRCTYTAGGCGMTCYCASRRARARARYTAGG 28380  
 Indonesia-88035 TRYCGTWGYSGCC TACYCYCAYKYTRGRWRCTYTAGGCGMTCYCASRRARARARYTAGG 28380  
 Indonesia-88045 TRYCGTWGYSGCC TACYCYCAYKYTRGRWRCTYTAGGCGMTCYCASRRARARARYTAGG 28380  
 Indonesia-88065 TRYCGTWGYSGCC TACYCYCAYKYTRGRWRCTYTAGGCGMTCYCASRRARARARYTAGG 28380  
 .\*\* \* \* . . . \* \* . . . \*\* .\*\*:

Bhutan-09015 SCTACRKRGTTYCYCYKSTRGKSYYYWAKRCSWKMKRWRRGYKTACRYRGYRRRRGCTR 28440  
 Bhutan-09024 SCTACRKRGTTYCYCYKSTRGKSYYYWAKRCSWKMKRWRRGYKTACRYRGYRRRRGCTR 28440  
 Bhutan-09027 SCTACRKRGTTYCYCYKSTRGKSYYYWAKRCSWKMKRWRRGYKTACRYRGYRRRRGCTR 28440  
 Bhutan-09030 SCTACRKRGTTYCYCYKSTRGKSYYYWAKRCSWKMKRWRRGYKTACRYRGYRRRAAGCTR 28440  
 Bhutan-09005 SYKMGRKRITYYYYCYTKSTARGGYYYARGRMSWTCGRWRRRTGWWGGCGSYRRRGAYYR 28440  
 Indonesia-88035 SYKMGRKRITYYYYCYTKSTARGGYYYARGRMSWTCGRWRRRTGWWGGCGSYRRRGAYYR 28440  
 Indonesia-88045 SYKMGRKRITYYYYCYTKSWRRGGYYARGRMSWTCGRWRRRTGWWGGCGSYRRRGAYYR 28440  
 Indonesia-88065 SYKMGRKRITYYYYCYTKSTARGGYYYARGRMSWTCGRWRRRTGWWGGCGSYRRRGAYYR 28440  
 \* . \*\*\* \* \*\* .\*\*\* \* \*\* .\*\*\* .\*\*\*\* . \*

Bhutan-09015 AKTAYTGCAGGWRCAAGACRRAYAYTRWYAMWCYRTTGCRAYWCWYAAACTRRRTAYGACR 28500  
 Bhutan-09024 AKTAYTGCAGGWRCAAGACRRAYAYTRWYAMWCYRTTGCRAYWCWYAAACTRRRTAYGACA 28500  
 Bhutan-09027 AKTAYTGCAGGWRCAAGACRRAYAYTRWYAMWCYRTTGCRAYWCWYAAACTRRRTAYRACR 28500  
 Bhutan-09030 AKTAYTGCAGGWRCAAGACRRAYAYTRWYAMWCYRTTGCRAYWCWYAAACTRRRTAYRACR 28500  
 Bhutan-09005 WGKMTYRMRKRWGYRWRMYARMYRCYRWTCAAYCGYYATARCWYTYRGTTGAAKRTGTYA 28500  
 Indonesia-88035 WGKMTYRMRKRWGYRWRMYARMYRCYRWTCAAYCGYYATARCWYTYRGTTGAAKRTGTYA 28500

Indonesia-88045 WGKMTYRMAGRWG YRWRMY ARMYR CYRWTCAAYCGYYATARCWYTYRGTGAAKRTGTYA 28500  
Indonesia-88065 WGKMTYMRKRWG YRWRMY ARMYR CYRWTCAAYCGYYATARCWYTYRGTGAAKRTGTYA 28500  
. \* \* \* \* . \* \* . : . :

Bhutan-09015 YWYRMCSTRCAATMGTAKRRTKRRCRSMAGATRRCYWYRRCRASACGAGGCGATCW 28560  
Bhutan-09024 YWYRMCSTRCAATMGTAKRRTKRRCRSMAGATRRCYWYRRCRASACGAGGCGATCW 28560  
Bhutan-09027 YWYRMCSTRCAAYMGTAKRRTKRRCRSMAGATRRCYWYRRCRASACGAGGCGATCW 28560  
Bhutan-09030 YWCAMCSTRCAAYMGTAKRRTKRRCRSMAGATRRCYWYRRCRASACGAGGCGATCW 28560  
Bhutan-09005 TATGAMCWRYTATCRCGKRRTKGAARRYRGCRCMYGRTYWTGTAYAGGTYRMSSYKMYA 28560  
Indonesia-88035 TATGAMCWRYTWTCRCGKRRTKGAARRYRGCRCMYGATYWTGTAYAGGTYRMSSYKMYA 28560  
Indonesia-88045 TATGAMCWRYTWTCRCGKRRTKGAARRYRGCRCMYGATYWTGTAYAGGTYRMSSYKMYA 28560  
Indonesia-88065 TATGAMCWRYTATCRCGKRRTKGAARRYRGCRCMYGRTYWTGTAYAGGTYRMSSYKMYA 28560  
. \* : . \*\* . \* . \*\* . . : . .

Bhutan-09015 YWYSKMCYRMMGMWCTKSGYAKCRKYKRYTYGCACGAGGMRSARCCYWTWRRARRCMS 28620  
Bhutan-09024 YWYSKMCYRMMGMWCTKSGYAKCRKYKRYTYGCACGAGGMRSARCCYWTWRRARRCMS 28620  
Bhutan-09027 YWYSGCCYRMMGMWCTKSGYAKCRKYKRYTYGCACGAGGMRSARCCYWTWRRARRCMS 28620  
Bhutan-09030 YWYSKMCYRMMGMWCTKSGYAKCRKYKRYTYGCACGAGGMRSARCCYWTWRRARRCMS 28620  
Bhutan-09005 YATGGCTCTRMAKAASWGGATCRGYGKCKGTYRYMYKWARAGSRRTSYWCTAARGGGCC 28620  
Indonesia-88035 YATGGCTCTRMAKAASWGGATCRGYGKCKGTYRYMYKWARAGSRRTSYWCTAARGGGCC 28620  
Indonesia-88045 YATGGCTYTRMAKAASWGGATCRGYGKCKGTYRYMYKWARAGSRRTSYWCTAARGGGCC 28620  
Indonesia-88065 YATGGCTYTRMAKAASWGGATCRGYGKCKGTYRYMYKWARAGSRRTSCWCTAARGGGCC 28620  
\* . \*\* . . \* \* . \* . \* \* . \*

Bhutan-09015 GAYGRCSGGRRTTYTCKTWYGRMYRYKCRGGYTYRRYWKRRRRRWTGYSRMGTTYMG 28680  
Bhutan-09024 RAYGRCSGGRRTTYTCKTWYGRMYRYKCRGGYTYRRYWKRRRRRWTGYSRMGTTYMG 28680  
Bhutan-09027 RAYGRCSGGRRTTYTCKTWYGRMYRYKCRGGYTYRRYWKRRRRRWTGYSRMGTTYMG 28680  
Bhutan-09030 GAYGRCSGGRRTTYTCKTWYGRMYRYKCRGGYTYRRYWKRRRRRWTGYSRMGTTYMG 28680  
Bhutan-09005 GWTRRYSARSRRATCYYYGYWARCATYGYAGTCWCAATWYGGARGGAKKCGAAKYCAS 28680  
Indonesia-88035 GWTRRYSARSRRAYCYYYGYWARCATYGYAAGCWCAATWYGGARGGAKKCGAAKYCAS 28680  
Indonesia-88045 GWTRRYSARSRRAYCYYYGYWARCATYGYAAGCWCAATWYGGARGGAKKCGAAKYCAS 28680  
Indonesia-88065 GWTRRYSARSRRAYCYYYGYWARCATYGYAGTCWCAATWYGGARGGAKKCGAAKYCAS 28680  
\* \* . \*\* \* \*\* \* \* . \*\* \* . . .

Bhutan-09015 CRKAGYGAGYRTRGSWYRMMAYWYAYGGAGKCTCYGYACCKRYAAMWRYRGTAY 28740  
Bhutan-09024 CRKAGYGAGYRTRGSWYRMMAYWYAYGGAGKCTCYGYACCKRYAAMWRYRGTAY 28740  
Bhutan-09027 CRKAGYGAGYRTRGSWYRMMAYWYAYGGAGKCTCYGYACCKRYAAMWRYRGTAY 28740  
Bhutan-09030 CRKAGYGAGYRTRGSWYRMMAYWYAYGGAGKCTCYGYACCKRYAAMWRYRGTAY 28740  
Bhutan-09005 YATTRTTGACATWRSCTCTRMCRCWYRRCGKCYRYTTMMGGYGGWRMWAYAACT 28740  
Indonesia-88035 YATTRTTGACATWRSCTCTRMCRCWYRRCGKCYRYTTMMGGYGGWRMWAYAACT 28740  
Indonesia-88045 YATTRTTGACATWRSCTCTRMCRCWYRRCGKCYRYTTMMGGYGGWRMWAYAACT 28740  
Indonesia-88065 YATTRTTGACATWRSCTCTRMCRCWYRRCGKCYRYTTMMGGCGGWRMWAYAACT 28740  
. : . . \* . \*\* \*\* \* . \* : . \* \*\* \* . .

Bhutan-09015 RGRCARAYWGYCCCKGAACYWYKSYRARYCWYMGKTTYGGRATYCTKGAYRSTYMYWW 28800  
Bhutan-09024 RGRCARAYWGYCCCKGAACYWYKSYRARYCWYMGKTTYGGRATYCTKGAYRSTYMYWW 28800  
Bhutan-09027 RGRCARAYWGYCCCKGAACYWYKSYRARYCWYAGKTTYGGRATYCTKGAYRSTYMYWW 28800  
Bhutan-09030 RGRCARAYWGYCCCKGAACYWYKSYRARYCWYMGKTTYGGRATYCTKGAYRSTYMYWW 28800  
Bhutan-09005 RRRARWTARTCCYTGCRRCYATYTGARCSATCRTTYYRRGRWTSTTRWTACKYAYWW 28800  
Indonesia-88035 RRRARWTARTCCYTGCRRCYATYTGARRCAYCRTYYRRGRWYCYTRWTACKYAYWW 28800  
Indonesia-88045 RRRTRWTARTCCYTGCRRCYATYTGARRCAYCRTYYRRGRWYCYTRWTACKYAYWW 28800  
Indonesia-88065 RRRARWTARTCCYTGCRRCYATYTGARCSATCRTTYYRRGRWTSTTRWTACKYAYWW 28800  
\* \* \* . \* : . \* . \* . . \* \*\*

Bhutan-09015 TRYACYARYCYWGTYRKMICYMYRARYTAAKAYMCCAYWSSRGATYRAGRGGCMRATCG 28860  
 Bhutan-09024 TRYACYARYCYWGTYRKMICYMYRARYTAAKAYMCCAYWSSRGATYRAGRGGCMRATCG 28860  
 Bhutan-09027 TRYACYARYCYWGTYRKMICYMYRARYTAAKAYMCCAYWSSRGATYRAGRGGCMRATCG 28860  
 Bhutan-09030 TRYACYARYCYWGTYRKMICYMYRARYTAAKAYMCCAYWSSRGATYRAGRGGCMRATCG 28860  
 Bhutan-09005 KGYRITYAGYYCARYYRGACSTACAGGCTWRTWYCMTGWTTGCRRRYRRRRRACMRGKCK 28860  
 Indonesia-88035 KGYRITYAGYYCAGYYRKACSYACAGGCTWRTWYCMTGWTTGCRRRYRRRRRACMRGKCK 28860  
 Indonesia-88045 KGYRITYAGYYCAGYYRKACSYACAGGCTWRTWYCMTGWTTGCRRRYRRRRRACMRGKCK 28860  
 Indonesia-88065 KGYRITYAGYYCARYYRGACSTACAGGCTWRTWYCMTGWTTGCRRRYRRRRRACMRGKCK 28860  
 . \* \* \* \*\* . . \* \* . \* \*\* ..

Bhutan-09015 MCRYARYGGYRMKYTTGCTRYKCCAKRSRWCWRYCRKMWYRMCYARRRWSWYARRCY 28920  
 Bhutan-09024 MCRYARYGGYRMKYTTGCTRYKCCAKRSRWCWRYCRKMWYRMCYARRRWSWYARRCY 28920  
 Bhutan-09027 MCRYARYGGYRMKYTTGCTRYKCCAKRSRWCWRYCRKMWYRMCYARRRWSWYARRCY 28920  
 Bhutan-09030 MCRYARYGGYRMKYTTGCTRYKCCAKRSRWCWRYCRKMWYRMCYARRRWSWYARRCY 28920  
 Bhutan-09005 CCGCWACGSTAMKYYWRYGRYGYTWTGCGWSTRYSAAMWYACCGRRRTRSWCAAGYTT 28920  
 Indonesia-88035 CYGCWACRGTAMKYYWRYGRYGYTWTGCGWSTRYSAAMWYACCGRRRTRSWCAAGYTT 28920  
 Indonesia-88045 CYGCWACRGTAMKYYWRYGRYGYTWTGCGWSTRYSAAMWYACCGRRRTRSWCAAGYTT 28920  
 Indonesia-88065 CCGCWACGSTAMKYYWRYGRYGYTWTGCGWSTRYSAAMWYACCGRRRTRSWCAAGYTT 28920  
 . \*\*\* \*\* . . \* . \*\* \* \*\* .

Bhutan-09015 MRWRGAKAAGTCGAMYTRCYAGTYRWYRTARAGYRAWYTTKSACYCRRTGTTKKSCSRMM 28980  
 Bhutan-09024 MRWRGAKAAGTCGAMYTRCYAGTYRWYRTARAGYRAWYTTKSACYCRRTGTTKKSCSRMM 28980  
 Bhutan-09027 MRWRGAKAAGTCGAMYTRCYAGTYRWYRTARAGYRAWYTTKSACYCRRTGTTKKSCSRMM 28980  
 Bhutan-09030 MRWRGAKAAGTCGAMYTRCYAGTYRWYRTARAGYRAWYTTKSACYCRRTGTTKKSCSRMM 28980  
 Bhutan-09005 MGWRRCGRMRCCACMYRTRCGKYTGTTAWWRTRYAAYWYKGSAYYSRAAGYTTKSYCAAC 28980  
 Indonesia-88035 MGWRRCGRMRMACMYRTRCGKYTGTTAWWRTRYARTYTKGSCYYSAARVCTKSYCAAC 28980  
 Indonesia-88045 MGWRRCGRMRMACMYRTRCGKYTGTTAWWRTRYARTYTKGSCYYSAARVCTKSYCAAC 28980  
 Indonesia-88065 MGWRRCGRMRCCACMYRTRCGKYTGTTAWWRTRYAAYWYKGSAYYSRAAGYTTKSYCAAC 28980  
 \* \* \* . . \* \* . \* : \* \* . \* . \* \* : . \* \* .

Bhutan-09015 WSCCYCKCACGRKKYKAWSGTYCRAWRWAWYRGAMRRAYGATKWKSWAYCGTMTSYRY 29040  
 Bhutan-09024 WSCCYCKCACGRKKYKAWSGTYCRAWRWAWYRGAMRRAYGATKWKSWAYCGTMTSYRY 29040  
 Bhutan-09027 WSCCYCKCACGRKKYKAWSGTYCRAWRWAWYRGAMRRAYGATKWKSWAYCGTMTSYRY 29040  
 Bhutan-09030 WSCCYCKCACGRKKYKAWSGTYCRAWRWAWYRGAMRRAYGATKWKSWAYCGTMTSYRY 29040  
 Bhutan-09005 AGYMCCYKYWAGRTGCKMWSRYSGRARWRACGKWCRGCCRGCGATGCARYTGYMCGTAT 29040  
 Indonesia-88035 AGYMCCYKYTARRTGCKMWSRYSGRARWRACGKWCRGCCRGCGATGCARYTAYMCGTAT 29040  
 Indonesia-88045 AGCCCCYKYTARRTGCKMWSRYSGRARWRACGKWCRGCCRGCGATGCARYTAYMCGTAT 29040  
 Indonesia-88065 AGYMCCYKYWAGRTGCKMWSRYSGRARWRACGKWCRGCCRGCGATGCARYTGYMCGTAT 29040  
 . \* . \* . \* \* \* \* . \* \* \* . \* . \* .

Bhutan-09015 AGTWTTMWKCGARKGARGTRGAYKTCWMYKSYYSWCWRYTCTSAMYRWRKTRYKTSWMM 29100  
 Bhutan-09024 AGTWTTMWKCGARKGARGTRGAYKTCWMYKSYYSWCWRYTCTSAMYRWRKTRYKTSWMM 29100  
 Bhutan-09027 AGTWTTMWKCGARKGARGTRGAYKTCWMYKSYYSWCWRYTCTSAMYRWRKTRYKTSWMM 29100  
 Bhutan-09030 AGTWTTMWKCGARKGARGTRGAYKTCWMYKSYYSWCWRYTCTSAMYRWRKTRYKTSWMM 29100  
 Bhutan-09005 WSYTYTCWKYRGGGKRRRYATGCTYYAMTKSTCGWYTRYWYCRMYRAGKYATTKTSWMA 29100  
 Indonesia-88035 ASYTYKCWKYRGGGTRRRTATGCTYYAMYKSTCGWYTRYWYCRMYRAGKYATTKTSWMA 29100  
 Indonesia-88045 ASYTYKCWKYRGGGTRRRTATGCTYYAMYKSTCGWYTRYWYCRMYRAGKYATTKTSWMA 29100  
 Indonesia-88065 WSYTYTCWKYRGGGTRRRTATGCTYYAMTKSTCGWYTRYWYCRMYRAGKYATTKTSWMA 29100  
 . . \* \* . \* . . \* \* \* \* \* \* \* \* . \* \* \* .

Bhutan-09015 KRSYGKASWYMWYSAWYKGGYTMYYGMTCKYGTRAMYTYMYRRRTYCRCTYYRYKTRRG 29160  
 Bhutan-09024 KRSYGKASWYMWYSAWYKGGYTMYYGMTCKYGTRAMYTYMYRRRTYCRCTYYRYKTRRG 29160  
 Bhutan-09027 KRSYGKASWYMWYSAWYKGGYTMYYGMTCKYGTRAMYTYMYRRRTYCRCTYYRYKTRRG 29160  
 Bhutan-09030 KRSYGKASWYMWYSAWYKGGYTMYYGMTCKYGTRAMYTYMYRRRTYCRCTYYRYKTRRG 29160

Bhutan-09005 GRGTTKKTACAWYSMATGSGTKAYYKATYTCCWRGMTACATRGRYYAGYKWCYRTGCRRK 29160  
Indonesia-88035 GRGTTKKTACAWYSMATGSGTKAYYKATYTCCWRGMTACATRGRYYAGYKWCYRTGCRRK 29160  
Indonesia-88045 GRGTTKKTACAWYSMATGSGTKAYYKATYTCCWRGMTACATRGRYYAGYKWCYRTGCRRK 29160  
Indonesia-88065 GRGTTKKTACAWYSMATGSGTKAYYKATYTCCWRGMTACATRGRYYAGYKWCYRTGCRRK 29160  
\* . \* . \*\*\* . . . \* . . \* : \* \* . . \*\* \*\*

Bhutan-09015 YSYKRYTCMCKYACCYRRRCYRTCTKCAARATKASYWCARRTSCYTTWRRRCYACKYTR 29220  
Bhutan-09024 YSYKRYTCMCKYACCYRRRCYRTCTKCAARATKASYWCARRTSCYTTWRRRCYACKYTR 29220  
Bhutan-09027 YSYKRYTCMCTYACCYRRRCYRTCTKCAARATKASYWCARRTSCYTTWRRRCYACKYTR 29220  
Bhutan-09030 YSYKRYTCMCKYACCYRRRCYRTCTKCAARATKASYWCARRTSCYTTWRRRCYACKYTR 29220  
Bhutan-09005 TSTTRTYMCCTYRAMTRRATTGYTYKSRTARYTMGCYWYGRATCMTTYAAARYTGTYCA 29220  
Indonesia-88035 TSTTRTYMCCTYRAMYRRRCTGYTYKSRTARTTMGCYWYGRAKCMTTYAAARYTGTYCA 29220  
Indonesia-88045 TSTTRTYMCCTYRAMYRRRCTGYTYKSRTARTTMGCYWYGRAKCMTTYAAARYTGTYCA 29220  
Indonesia-88065 TSTTRTYMCCTYRAMTRRATTGYTYKSRTARYTMGCYWYGRATCMTTYAAARYTGTYCA 29220  
\* . \* . \* . \*\* \* . : . . \*\* . \* . . \* . . \*

Bhutan-09015 YYYWRKAWYWRWWYTYRMTCCCRTKYRKRWTMCKYACSGGRYMACGMKCMGWTYWGSG 29280  
Bhutan-09024 YYYWRKAWYWRWWYTYRMTCCCRTKYRKRWTMCKYACSGGRYMACGMKCMGWTYWGSG 29280  
Bhutan-09027 YYYWRKAWYWRWWYTYRMTCCCRTKYRKRWTMCKYACSGGRYMACGMKCMGWTYWGSR 29280  
Bhutan-09030 YYYWRKAWYWRWWYTYRMTCCCRTKYRKRWTMCKYACSGGRYMACGMKCMGWTYWGSR 29280  
Bhutan-09005 TTTACGRKAWYWGWWYKYRCCGMMRYKYGTRAWKAGCCWYSGRATAWAAMKACRATCWASG 29280  
Indonesia-88035 TTTAYAGKAWYWGWWYKYRCCGMMRYKYGTRAWKAGCCWYSGRATAWAAMKACRATCWASG 29280  
Indonesia-88045 TTTAYARRKAWYWGWWYKYRCCGMMRYKYGTRAWKAGCCWYSGRATAWAAMKACRATCWASG 29280  
Indonesia-88065 TTTACGRKAWYWGWWYKYRCCGMMRYKYGTRAWKAGCCWYSGRATAWAAMKACRATCWASG 29280  
\*\*\*\* \*\* . \*\* \* \*\* . \* \* \* . . \*\* . \* . \*

Bhutan-09015 TWKYKYYAYYYAASYGRAWRRCRSCRRAASWYTRGTRATCWWWYSYKGSRAATKYCYA 29340  
Bhutan-09024 TWKYKYYAYYYAASYGRAWRRCRSCRRAASWYTRGTRATCWWWYSYKGSRAATKYCYA 29340  
Bhutan-09027 KWKYKYYAYYYAASYGRAWRRCRSCRRAASWYTRGTRATCWWWYSYKGSRAATKYCYA 29340  
Bhutan-09030 TWKYKYYAYYYAASYGRAWRRCRSCRRAASWYTRGTRATCWWWYSYKGSRAATKYCYA 29340  
Bhutan-09005 TWKMYTKYATCTACRRTGRYSSRAYGGGWCCAGCRCYSATAYSCKSSRRYTTYW 29340  
Indonesia-88035 TWKMYTKYCWYCTWCCRRRTGRYSSRAYGGGWCCAACACYSATATSCKSSRRYTTYW 29340  
Indonesia-88045 TWKMYTKYCWYCTWCCRRRTGRYSSRAYGGGWCCAACACYSATATSCKSSRRYTTYW 29340  
Indonesia-88065 TWKMYTKYCWYCTACRRTGRYSSRAYGGGWCCAGCRCYSATAYSCKSSRRYTTYW 29340  
. \*\* \* . \*\* . . \* \* \* . \* . . . \* \* . \*\* . \*

Bhutan-09015 YGCYYCTTYMYAWSTTATAWSWKRYMRAGCWTCKYMATRRRRWTAMTGGYCKTYYCGMG 29400  
Bhutan-09024 YGCYYCTTYMYAWSTTATAWSWKRYMRAGCWTCKYMATRRRRWTAMTGGYCKTYYCGMG 29400  
Bhutan-09027 YGCYYCTTYMYAWSTTATAWSWKRYMRAGCWTCKYMATRRRRWTAMTGGYCKTYYCGMG 29400  
Bhutan-09030 YGCYYCTTYMYAWSTTATAWSWTRYMRAGCWTCKYMATRRRRWTAMTGGYCKTYYCGMG 29400  
Bhutan-09005 YRYCTCMAYWCCRTGYTRWWWCATRYARRTYAYYKYARCGARRAYWMTKRYSKTCYSGCR 29400  
Indonesia-88035 YRYCTCMATAACRWGYRWWWCATGYARRGYAYYKYARCGAAAAWWMYKRYSKKCYSRCR 29400  
Indonesia-88045 YRYCTCMATAACRWGYRWWWCATGYARRGYAYYKYARCGAAAAWWMYKRYSKKCYSRCR 29400  
Indonesia-88065 YRYCTCMAYWCCRTGYTRWWWCATRYARRTYAYYKYARCGARRAYWMTKRYSKTCYSGCR 29400  
\* : . \* . \* \* \*\* \* \* . \* . \*

Bhutan-09015 YKYYTCGMAAKKKAYRACTSKRYWYKRYWCRCRYWRTGKATTCTASWMYRWGARTATTT 29460  
Bhutan-09024 YKYYTCGMAAKKKAYRACTSKRYWYKRYWCRCRYWRTGKATTCTASWMYRWGARTATTT 29460  
Bhutan-09027 YKYYTCGMAAKKKAYRACTSKRYWYKRYWCRCRYWRTGKATTCTASWMYRWGARTATTT 29460  
Bhutan-09030 YKYYTCGMAAKKKAYRACTSKRYWYKRYWCRCRYWRTGKATTCTASWMYRWGARTATTT 29460  
Bhutan-09005 TGCTGCSAMMGTRTAMYSKRRTSYTGTTYASATWAYSGMTYYKWSWMYGARRRYRYWY 29460  
Indonesia-88035 TKCTTYSAMMGTRTAMYSKRRTSYTGTTYASATWAYSSTMAYYKWSWMYGARRRYRYWY 29460  
Indonesia-88045 TKCTTYSAMMGTRTAMYSKRRTSYTGTTYASATWAYSSTMAYYKWSWMYGARRRYRYWY 29460  
Indonesia-88065 TGCTGCSAMMGTRTAMYSKRRTSYTGTTYASATWAYSGMTYYKWSWMYGARRRYRYWY 29460



. . . . . \*\*\* \* . . \* . : . \*\*\*\*\* \*

Bhutan-09015 TTKACSAYTRTYRTGMAARRCGYAGYAGGRMGSRRKMSKYKWRRGACCRAYYAARTRRRG 29520

Bhutan-09024 TTKACSACTGTYRTGMAARRCGYAGYAGGRMGSRRKMSKYKWRRGACCRAYYAARTRRRG 29520

Bhutan-09027 TTKACSAYTRTYRTGMAARRCGYAGYAGGRMGSRRKMSKYKWRRGACCRAYYAARTRRRG 29520

Bhutan-09030 TTKACSAYTRTYRTGMAARRCGYRKYAGGRMGSRRKMSKYKWRRGACCRAYYAARTRRRG 29520

Bhutan-09005 YYTRSCRYRYRYRYRYSAGARRASYAGCGKRARGGRKCCGYTWGARACYGWYCMGARTAGG 29520

Indonesia-88035 CYTRSCRYRYRYRYRYSAGARRASYAGYRKRARGGRKCCGYTWGARARYYGWYCMGARTAGG 29520

Indonesia-88045 CYTRSCRYRYRYRYRYSAGARRASYAGYRKRARGGRKCCGYTWGARARYYGWYCMGARTAGG 29520

Indonesia-88065 YYTRSCRYRYRYRYRYSAGARRASYRKCGRARGGRKCCGYTWGARACYGWYCMGARTAGG 29520

. . . . . \*\* . . \*\* . \* . . . . \* . . . .

Bhutan-09015 GRYYGCRTRKATSRTATAGAGYATTRKYRYYGTKKGTTTGYRARTRGAYWSGARRTWMRR 29580

Bhutan-09024 GRYYGCRTRKATSRTATAGAGYATTRKYRYYGTKKGTTTGYRARTRGAYWSGARRTWMRR 29580

Bhutan-09027 GRYYGCRTRKAWSTRATAGAGYATTRKYRYYGTKKGTTTGYRARTRGAYWSGARRTWMRR 29580

Bhutan-09030 GRYYGCRTRKATSRTATAGAGYATTRKYRYYGTKKGTTTGYRARTRGAYWSGARRTWMRR 29580

Bhutan-09005 RGCCCYGWAKMTGGTRTARRRYRYAGTRCTRTKGSAWTRYAMTRFRMTACGARAYTMAA 29580

Indonesia-88035 GGCCCYGWAKMTGGCAWRRRYRYAGTRCTRWKGSAWKRYAARKRRMTACKRGAYTAAA 29580

Indonesia-88045 GGCCCYGWAKMTGGCAAGRRRYRYAGTRCTRWKGSAWKRYAARKRRMTACKRGAYTAAA 29580

Indonesia-88065 RGCCCYGWAKMTGGTRTARRRYRYAGTRCTRTKGSAWTRYAMTRFRMTACGARAYTMAA 29580

\* . . \* \* \* \* . : . \* \* \* .

Bhutan-09015 ACAYYCWMWTWGSWGRGMAYYYGCTRYRGGWRWRYTAKRSRMYKGRRTMGYWRTYMTYTS 29640

Bhutan-09024 ACAYYCWMWTWGSWGRGMAYYYGCTRYRGGWRWRYTAKRSRMYKGRRTMGYWRTYMTYTS 29640

Bhutan-09027 ACAYYCWMWTWGSWGRGMAYYYGCTRYRGGWRWRYTAKRSRMYKGRRTMGYWRTYMTYTS 29640

Bhutan-09030 ACAYYCWMWTWGSWGRGMAYYYGCTRYRGGWRWRYTAKRSRMYKGRRTMGYWRTYMTYTS 29640

Bhutan-09005 WMRYTGTAAYTSSKWGACCYYSSYAYATRAARTCRGRSRYKRAAYAKCATAYCYYYG 29640

Indonesia-88035 AMRYTGTAAYTSSKWGACMCYYSSYAYATRAARTCRGASRMYKGAAYAGCATATYCYYYG 29640

Indonesia-88045 AMRYTGTAAYTSSKWGACMCYYSSYAYATRAARTCRGASRMYKGAAYAGCATATYCYYYG 29640

Indonesia-88065 WMRYTGTAAYTSSKWGACCYYSSYAYATRAARTCRGRSRYKRAAYAKCATAYCYYYG 29640

\* . . \* \* . . \*\* . . \* \* \* \* \* \* \* \* .

Bhutan-09015 MCGTCCMRKYRTRGSCGTCCRKGYRTTACMKYSYRRRYKYCYSYSRYRRCMAYGACKGW 29700

Bhutan-09024 MCGTCCMRKYRTRGSCGTCCRKGYRTTACMKYSYGRATKYCYSYSRYRRCMAYGACKGW 29700

Bhutan-09027 MCGTCCMRKYRTRGSCGTCCRKGYRTTACMKYSYGRATKYCYSYSRYRRCMAYGACKGW 29700

Bhutan-09030 MCGTCCMRKYRTRGSCGTCCRKGYRTTACMKYSYGRATKYCYSYSRYRRCMAYGACKGW 29700

Bhutan-09005 MYSCYSCRGTGTARGMGRKKAAYRMCYSYRAATKTYTGYYGCGYAAAMMYWRTTRT 29700

Indonesia-88035 MCSCYCCRGTGTARGMGRKKAAYRMCYSYRRATKTYTGYYGCGYAAAMMYTATTRT 29700

Indonesia-88045 MCSCYCCRGTGTARGMGRKKAAYRMCYSYRRRYKTYTGYYGCGYAAAMMYTATTRT 29700

Indonesia-88065 MYSCYSCRGTGTARGMGRKKAAYRMCYSYRRATKTYTGYYGCGYAAAMMYWRTTRT 29700

\* . . \* . . \*\* . . \*\*\*\* \* . \* \* . \* \* .

Bhutan-09015 RRCMAGRYGRYRYMKRGATRGGKKAYAKKTCATARKRWRCATTTKYYKARTMKSYYWYK 29760

Bhutan-09024 RRCMAGRYGRYRYMKRGATRGGKKAYAKKTCATARKRWRCYWTTKYYKARTMKSYYWYK 29760

Bhutan-09027 RRCMAGRYGRYRYMKRGATRGGKKAYAKKTCATARKRWRCYWTTKYYKARTMKSYYWYK 29760

Bhutan-09030 RRCMAGRYGRYRYMKRGATRGGKKAYAKKTCATARKRWRCYWTTKYYKARTMKSYYWYK 29760

Bhutan-09005 GRSCWKATKAYRYMKRRRYRATKTRCMGTWYGGMRTGAGCTAGGTYTGWGWAKSCYACG 29760

Indonesia-88035 GRSCWKATKAYRYMKRRRYRATKTRCMGTWYGGMRTGAGYAGGTYTGWGWAKSCYACG 29760

Indonesia-88045 GRSCWKATKAYRYMKRRRYRATKTRCMGTWYGGMRTGAGYAGGTYTGWGWAKSCYACG 29760

Indonesia-88065 GRSCWKATKAYRYMKRRRYRATKTRCMGTWYGGMRTGAGYAGGTYTGWGWAKSCYACG 29760

\* . . \*\*\*\*\* \* . \* . . . \* . . \*\* . \* \* \*

Bhutan-09015 MYRATCAMGWTWYSTAGRMAYRKYTSATRRMRTWYTYRYMARATYRCAACTMRYRYRTYY 29820

Bhutan-09024 MYRATCAMGWTWYSTAGRMAYRKYTSATRRMRTWYTYRYMARATYRCAACTMRYRYRTYY 29820

Bhutan-09027 MYRATCAMGWTWYSTAGRMAYRKTYSATRRMRTWYTYRYMARATYRCAACTMRYRYYY 29820  
 Bhutan-09030 MYRATCAMGWTWYSTAGRMAYRKTYSATRRMRTWYTYRYMARATYRCAACTMRYRYYY 29820  
 Bhutan-09005 MYAWYYMARWYACSYWKAMTCRTTYGGKAAMGWACYCGCCMAMYCTRYRMSWCRCYGACC 29820  
 Indonesia-88035 MYAWYYMARWYACSYWKAMTCRTTYGGKAAMRWATYCGCCMAMYCTRYRMSWCRCYGACC 29820  
 Indonesia-88045 MYAWYYMARWYACSYWKAMTCRTTYGGKAAMRWATYCGCCMAMYCTRYRMSWCRCYGACC 29820  
 Indonesia-88065 MYAWYYMARWYACSYWKAMTCRTTYGGKAAMGWACYCGCCMAMYCTRYRMSWCRCYGACC 29820  
 \*\* \* \* \* \* . . . \* \* \* . \* \* \* :

Bhutan-09015 GSYCTGRGACGGGYYYSATCCYAKRKYRMYTTWACWYTMCCAAGTYRWRCGCWARTYK 29880  
 Bhutan-09024 GSYCTGRGACRRGYYYSATCCYAKRKYRMYTTWACWYTMCCAAGTYRWRCGCWARTYK 29880  
 Bhutan-09027 GSYCTGRGACRRGYYYSRTCCYAKRKYRMYTTWACWYTMCCAAGTYRWRCGCWARTYK 29880  
 Bhutan-09030 GSYCTGRGACRRGYYYSATCCYAKRKYRMYTTWACWYTMCCAAGTYRWRCGCWARTYK 29880  
 Bhutan-09005 KGYTWRASRCKGGYTCCRWSYTRTGTTRCTYYAMCTCCMAYMWARCKTAGYSSWMRYCT 29880  
 Indonesia-88035 KGYTWRAGRYGGRYTCCRWSCTRTGTTRCTYYAMATCCMAYAWRCKTAGYSSWMRYCT 29880  
 Indonesia-88045 KGYTWRAGRYGGRYTCCATCTRTGTTRCTYYAMATCCMAYAWRCKTAGYSSWMRYCT 29880  
 Indonesia-88065 KGYTWRASRCKGGYTCCRWSYTRTGTTRCTYYAMCTCCMAYMWARCKTAGYSSWMRYCT 29880  
 . \* . \* . . . \* . \* . . \* \* .

Bhutan-09015 WYRRWKSTWCAKTCGYYCAWKWRYWCTYGRCRYGWMYRMTCAMCAYWATCCCTAACG 29940  
 Bhutan-09024 WYRRWKSTWCAKTCGYYCAWKWRYWCTYGRCRYGWMYRMTCAMCAYWATCCCTAACG 29940  
 Bhutan-09027 WYRRWKSTWCAKTCGYYCAWKWRYWCTYGRCRYGWMYRMTCAMCAYWATCCCTAACG 29940  
 Bhutan-09030 WYRRWKSTWCAKTCGYYCAWKWRYWCTYGRCRYGWMYRMTCAMCAYWATCCCTAACG 29940  
 Bhutan-09005 WTAGTGSCWARGYARYCYRAGWTATKWYTCRRYTRTMYAMYMMMMTTMYMMYAMRGR 29940  
 Indonesia-88035 WTAGTGSTTARKYAGYCYRAGWTATKWYTCRRYTRTMYAMYCCMMTTMYCCYAMRGR 29940  
 Indonesia-88045 WTAGTGSTTARKYAGYCYRAGWTATKWYTCRRYTRTMYAMYCCACTTMYCCYAMRGR 29940  
 Indonesia-88065 WTAGTGSCWARGYARYCYRAGWTATKWYTCRRYTRTMYAMYMMMMTTMYMMYAMRGR 29940  
 \* . . . \*\* \* \* \* \* \*\* :

Bhutan-09015 YRYGTKAYARTGCMRACCTRTTASWCWARAGGKAAMRRSGSGRKYRYYTRARCRATSK 30000  
 Bhutan-09024 YRYGTKAYARTGCMRACCTRTTASWCWARAGGKAAMRRSGSGRKYRYYTRARCRATSK 30000  
 Bhutan-09027 YRYGTKAYARTGCMRACCTRTTASWCWRRAGGKAAMRRSGSGRKYRYYTRARCRATSK 30000  
 Bhutan-09030 YRYGTKAYARTGCMRACCTRTTASWCWRRAGGKAAMRRSGSGRKYRYYTRARCRATSK 30000  
 Bhutan-09005 CGCGGTWTRAKRGAGGTYGAYATSTYTAGRKKCTRRMCGACKGRGTCTCYRMMAMRMWCG 30000  
 Indonesia-88035 CGCGGTWTRAGAGAGGTYGAYATSTYTAGRKKCTRRMCGACKGRGTCTCYAMAMRMWCG 30000  
 Indonesia-88045 CGCGGTWTRAGAGAGGTYGAYATSTYTAGRKKCTRRMCGACKGRGTCTCYAMAMRMWCG 30000  
 Indonesia-88065 CGCGGTWTRAKRGAGGTYGAYATSTYTAGRKKCTRRMCGACKGRGTCTCYRMMAMRMWCG 30000  
 . . . . : \* . . . \* .

Bhutan-09015 AWTMWWTKARRARYYCTYRWRKTARRRAAWKYCCRKYWGSMSSTRYRACWVWCASTARCG 30060  
 Bhutan-09024 AWTMWWTKARRARYYCTYRWRKTARRRAAWKYCCRKYWGSMSSTRYRACWVWCASTARCG 30060  
 Bhutan-09027 AWTMWWTKARRARYYCTYRWRKTARRRAAWKYCCRKYWGSMSSTRYRACWVWCASTARCG 30060  
 Bhutan-09030 AWTMWWTKARRARYYCTYRWRKTARRRAAWKYCCRKYWGSMSSTRYRACWVWCASTARCG 30060  
 Bhutan-09005 GACMATYTGAAWRTTYWTRGAKTRARGRTWKYMYATCAGCAKGGCARASATCASWRGYK 30060  
 Indonesia-88035 GACAATYTGAAWRTTYWTRGAKKRARGRTWKYMYATCAACAKGGCARASATCASWRGYK 30060  
 Indonesia-88045 GACAATYTGAAWRTTCWTRGAKKRARGRTWKYMYATCAACAKGGCARASATCASWRGYK 30060  
 Indonesia-88065 GACAATYTGAAWRTTCWTRGAKKRARGRTWKYMYATCAGCAKGGCARASATCASWRGYK 30060  
 . . . \* \* \* \* : \* \* . . . \* .

Bhutan-09015 MYTWMSSTATMARWYARKWTTKMASWYYMTSGGRKKAGYYWTCRAGYRWAATTAASKRMT 30120  
 Bhutan-09024 MYTWMSSTATMARWYARKWTTKMASWYYMTSGGRKKAGYYWTCRAGYRWAATTAASKRMT 30120  
 Bhutan-09027 MYTWMSSTATMARWYARKWTTKMASWYYMTSGGRKKAGYYWTCRAGYRWAATTAASKRMT 30120  
 Bhutan-09030 MYTWMSSTATMARWYARKWTTKMASWYYMTSGGRKKAGYYWTCRAGYRWAATTAASKRMT 30120  
 Bhutan-09005 MYYWMSYRCCRAWKYRRTTKAKCMGTYCACGKCGKTKYKYWYSRSTAWGMCYGSGGRC 30120  
 Indonesia-88035 MYYWMSYRCCRAWKYRRTTKAKCMGTYCACGKCGKTKYKYWYSRSTAWGMCYGSGGRC 30120

Indonesia-88045 MYYWMSYRCCRAWKYRRTWKAKCMGTYCACGKCGKTKYKYWYSRGTAWGMCYGGSGGRC 30120  
Indonesia-88065 MYYWMSYRCCRAWKYRRTWKAKCMGTYCACGKCGKTKYKYWYSRGTAWGMCYGGSGGRC 30120  
\*\* \*\*\* \* . \* \* . : \* . \* . \*\* : \*\*\* . \* . . \* . . \*

Bhutan-09015 WTGMYYGMYRAWKKAKGAAMYMGCSRGMMRGSRGYTRCKYASYYYARCYKYKAARYCY 30180  
Bhutan-09024 WTGMYYGMYRAWKKAKGAAMYMGCSRGMMRGSRGYTRCKYASYYYARCYKYKAARYCY 30180  
Bhutan-09027 WTGMYYGMYRAWKKAKGAAMYMGCSRGMMRGSRGYTRCKYASYYYARCYKYKAARYCY 30180  
Bhutan-09030 WTGMYYGMYRAWKKAKGAAMYMGCSRGMMRGSRGYTRCKYASYYYARCYKKAARYCY 30180  
Bhutan-09005 TASCYKMRGCRATGRGCGCTASGRRWAARSGRRTGYKYGGCTYWRMWTWWGCCGY 30180  
Indonesia-88035 TASCYKMRGCRATGRGCGCTASGRRWAARSGRRTGYKYGGCTYWRMWTWWGCCGY 30180  
Indonesia-88045 TASCYKMRGCRATGRGCGCTASGRRWAARSGRRTGYKYGGCTYWRMWTWWGCCGY 30180  
Indonesia-88065 TASCYKMRGCRATGRGCGCTASGRRWAARSGRRTGYKYGGCTYWRMWTWWGCCGY 30180  
: . \* \* . . . \*\* \* \*\* . \* \* : . . \*

Bhutan-09015 RRCKAYARSRRGCSAACRCSRAYWARRAACAYRMKRYWYACRRCRTCCWCYMWMTWSS 30240  
Bhutan-09024 RRCTAYARSRRGCSAACRCSRAYWARRAACAYRMKRYWYACRRCRTCCWCYMWMTWSS 30240  
Bhutan-09027 RRCKAYARSRRGCSAACRCSRAYWARRAACAYRMKRYWYACRRCRTCCWCYMWMTWSS 30240  
Bhutan-09030 RRCKAYARSRRGCSAACRCSRAYWARRAACAYRMKRYWYACRRCRTCCWCYMWMTWSS 30240  
Bhutan-09005 RAMTTTRGCRRTMCTGTGTCRCCTWRRRWMYRYRMKRTWCYRRTGYYYWYCMWCWASG 30240  
Indonesia-88035 RAMTTTRGCRRTMCTGTGTCRCCTWRRRWMYRYRMKRTWCYRRTGYYYWYCMWCWASG 30240  
Indonesia-88045 RAMTTTRGCRRTMCTGTGTCRCCTWRRRWMYRYRMKRTWCYRRTGYYYWYCMWCWASG 30240  
Indonesia-88065 RAMTTTRGCRRTMCTGTGTCRCCTWRRRWMYRYRMKRTWCYRRTGYYYWYCMWCWASG 30240  
\* . : . \*\* . : . . \* \* \* \* \* \* \* \* \* \* \* \*

Bhutan-09015 CGTGRRGWYCYCTMRRCWYACYAATTTGYGAYWTRASMYCYRWASACYWYRCRRTTTCYW 30300  
Bhutan-09024 CGTGRRGWYCYCTMRRCWYACYAATTTGYGAYWTRASMYCYRWASACYWYRCRRTTTCYW 30300  
Bhutan-09027 CGTGRRGWYCYCTMRRCWYACYAATTTGYGAYWTRASMYCYRWASACYWYRCRRTTTCYW 30300  
Bhutan-09030 CGTGRRGWYCYCTMRRCWYACYAATTTGYGAYWTRASMYCYRWASACYWYRCRRTTTCYW 30300  
Bhutan-09005 AAYRARSATACYKAGYTYRTTTCRCKYRCMCAYARSAYATRWWSWMCAYAYAGWVKYIA 30300  
Indonesia-88035 AACAAAGSATAACYKAGYTYRTTTCRCKYRCMCAYARSAYATRWWSWMCAYAYAGWVKYIA 30300  
Indonesia-88045 AACAAAGSATAACYKAGYTYRTTTCRCKYRCMCAYARSAYATRWWSWMCAYAYAGWVKYIA 30300  
Indonesia-88065 AAYRARSATACYKAGYTYRTTTCRCKYRCMCAYARSAYATRWWSWMCAYAYAGWVKYIA 30300  
. . . . \* . . \* . \* \* \* \* \*

Bhutan-09015 KCYCTCCCTYMMRGRSRYGWTYGRWGAKYRYWYCCGGRSRYASTCWTRSYAYRYK 30360  
Bhutan-09024 KSYCTCCCTYMMRGRSRYGWTYGRWGAKYRYWYCCGGRSRYASTCWTCTAYRYK 30360  
Bhutan-09027 KCYCTCCCTYMMRGRSRYGWTYGRWGAKYRYWYCCGGRSRYASTCWTASTACYRYK 30360  
Bhutan-09030 KCYCTCCCTYMMRGRSRYGWTYGRWGAKYRYWYCCGGRSRYASTCWTCTAYRYK 30360  
Bhutan-09005 KCTYYYSTTYCMGRRGRCRWYTKGWKGTIYAYWYCYKKGGRYATRCKSWYRGCATCACKR 30360  
Indonesia-88035 KCTYYYSTTKCCMGRRGRCRWYTKGWKGTIYAYWYCYKKGGRYATRCKCTTAGCATCACGG 30360  
Indonesia-88045 KCTYYYSTTKCMGRRGRCRWYTKGWKGTIYAYWYCYKKGGRYATRCKCTTAGCATCACGG 30360  
Indonesia-88065 KCTYYYSTTCCMGRRGRCRWYTKGWKGTIYAYWYCYKKGGRYATRCKSWYRGCRTCACKR 30360  
\* . . . \* \* \* \* \* \* \* \* \* \* \* \*

Bhutan-09015 CSCCTYRTWWYCGRRGAARS GTGGGKMRWYTYAYMYTRAACRGARGMRRGYCYTRYKAG 30420  
Bhutan-09024 CSCCTYRTWWYCGRRGAARS GTGGGKMRWYTYAYMYTRAACRGARGMRRGYCYTRYKAG 30420  
Bhutan-09027 CSCCTYRTWWYCGRRGAARS GTGGGKMRWYTYAYMYTRAACRGARGMRRGYCYTRYKAG 30420  
Bhutan-09030 CSCCTYRTWWYCGRRGAARS GTGGGKMRWYTYAYMYTRAACRGARGMRRGYCYTRYKAG 30420  
Bhutan-09005 YSMYTYGTYTWTYRGRRRRRCRKRKRKMGWYCYWTCMCKGGGYGRRRRRCARSCCTTACGRK 30420  
Indonesia-88035 CCCCTTGYTATTCGGAARRRCGTGGGTCGTTTCATCCTGGGCGGARRCAGSCTTTACGAG 30420  
Indonesia-88045 CCCCTTGYTATTCGGAARRRCGTGGGTCGTTTCATCCTGGGCGGARRCAGSCTTTACGAG 30420  
Indonesia-88065 YSMYTYGTYTWTYRGRRRRRCRKRKRKMGWYCYWTCMCKGGGYGRRRRRCARSCCTTACGRK 30420  
. . . \* . . . . \* . .

|                 |                                                             |       |
|-----------------|-------------------------------------------------------------|-------|
| Bhutan-09015    | CYCCTGAYTSAWYRYRTAAGGAAATCAATTWVKRGCAGMKATGAACYRGGCGYRCKCGW | 30480 |
| Bhutan-09024    | CYCCTGAYTSAWYRYRTAAGGAAATCAATTWVKRGCAGMKATGAACYRGGCGYRCKCGW | 30480 |
| Bhutan-09027    | CYCCTGAYTSAWYRYRTAAGGAAATCAATTWVKRGCAGMKATGAACYRGGCGYRCKCGW | 30480 |
| Bhutan-09030    | CYCCTGAYTSAWYRYRTAAGGAAATCAATTWVKRGCAGMKATGAACYRGGCGYRCKCGW | 30480 |
| Bhutan-09005    | MYSCSRKGGWYRYRYRMSGRCWWYWGYPATGARMAMSCGTWRWAYAARYRYRYTCGT   | 30480 |
| Indonesia-88035 | CYCCGRRTGWYRYRTAAGGAMATYWGYPATGARMAMSCGTWRCTAYAARYRYRYTAAT  | 30480 |
| Indonesia-88045 | CYCCGRRTGWYRYRTAAGRAMATYWGYPATGARMAMSCGTWRCTMYAARYRYRYTAAT  | 30480 |
| Indonesia-88065 | MYSCSRKGGWYRYRYRMSGACWWYWGYPATGARMAMSCGTWRWYMAARYRYRYTCGT   | 30480 |
|                 | * . . . . ***** . . . . : . * . ** . . .                    |       |
| Bhutan-09015    | GRAYCCWRRRTWRGRGKCTCASKYTYRYRSTWVRMCGCTWTARARWGGYRMSYGA     | 30540 |
| Bhutan-09024    | GRAYCCWRRRTWRGRGKCTCASKYTYRYRSTWVRMCGCTWTARARWGGYRMSYGA     | 30540 |
| Bhutan-09027    | GRAYCCWRRRTWRGRGKCTCASKYTYRYRSTWVRMCGCTWTARARWGGYRMSYGA     | 30540 |
| Bhutan-09030    | GRAYCCWRRRTWRGRGKCTCASKYTYRYRSTWVRMCGCTWTARARWGGYRMSYGA     | 30540 |
| Bhutan-09005    | GGGTATARGCTGSRKGYAGKCYTTRCACCACSCGCTCGGWGAAATTTGMMGTGG      | 30540 |
| Indonesia-88035 | AGGTATARGCTGSRKGYAGKCYTTRCACCACSCGCTCGGWGAAATTTGMSYKGG      | 30540 |
| Indonesia-88045 | AGGTATARGCTGSRKGYAGKCYTTRCACCACSCGCTCGGWGAAATTTGMSYKGG      | 30540 |
| Indonesia-88065 | GGGTATARGCTGSRKGYAGKCYTTRCACCACSCGCTCGGWGAAATTTGAMGTGG      | 30540 |
|                 | . . . * . * . * . . . . . * . . .                           |       |
| Bhutan-09015    | TYRYRYCYGWTGAYRWGTTARYARYTRRRMTTYARWCKRMTAAWRYRYACMTYAYGTR  | 30600 |
| Bhutan-09024    | TYRYRYCYGWTGAYRWGTTARYARYTRRRMTTYARWCKRMTAAWRYRYACMTYAYGTR  | 30600 |
| Bhutan-09027    | TYRYRYCYGWTGAYRWGTTARYARYTRRRMTTYARWCKRMTAAWRYRYACMTYAYGTR  | 30600 |
| Bhutan-09030    | TYRYRYCYGWTGAYRWGTTARYARYTRRRMTTYARWCKRMTAAWRYRYACMTYAYGTR  | 30600 |
| Bhutan-09005    | YTCGTGTARWYARTCATKKYWRWRTARRRMCYRAWYGAMCRRWRRCGTCGAATCTTCG  | 30600 |
| Indonesia-88035 | YTCGTGTARWYARTCATKKYWRWRTARRRMCYRAWYGAMCRRWRRCRYMGMWYMYKYR  | 30600 |
| Indonesia-88045 | YTCGTGTARWYARTCATKKYWRWRTARRRMCYRAWYGAMCRRWRRCRYMGMWYMYKYR  | 30600 |
| Indonesia-88065 | YTCGTGTARWYARTCATKKYWRWRTARRRMCYRAWYGAMCRRWRRCRYMGMWYMYKYR  | 30600 |
|                 | . ** : . * * :***** * * * **                                |       |
| Bhutan-09015    | YRTYTCCRTRGRYCSRCGAGCTSWGWTASYSRCGKYTATAASTTWKGCARKWTATWWAY | 30660 |
| Bhutan-09024    | YRTYTCCRTRGRYCSRCGAGCTSWGWTASYSRYGKYTATAASTTWKGCARKWTATWWAY | 30660 |
| Bhutan-09027    | YRTYTCCRTRGRYCSRCGAGCTSWGWTASYSRYGKYTATAASTTWKGCARKWTATWWAY | 30660 |
| Bhutan-09030    | YRTYTCCRTRGRYCSRCGAGCTSWGWTASYSRYGKYTATAASTTWKGCARKWTATWWAY | 30660 |
| Bhutan-09005    | TGCTYYRYRRRYAYGYARKYKARCCRCYGRYRGYGCRCGYWTGKYRGRWKCWTWMT    | 30660 |
| Indonesia-88035 | YRYTTCYRYYRRRYAYGYARKYKARCCRCYGRYRGYGCRCGYWTGKYRGRWKCWTWMT  | 30660 |
| Indonesia-88045 | YRYTTCYRYYRRRYAYGYARKYKARCCRCYGRYRGYGCRCGYWTGKYRGRWKCWTWMT  | 30660 |
| Indonesia-88065 | YRYTYYRYRRRYAYGYARKYKARCCRCYGRYRGYGCRCGYWTGKYRGRWKCWTWMT    | 30660 |
|                 | * * ** . . . . .**.* * . . . * * . *                        |       |
| Bhutan-09015    | WRRRYRRRARRGTRCRAWWSWTYRKYRYAMYSRYATAGGWYGRGGYGYTKYCCGWRRS  | 30720 |
| Bhutan-09024    | WRRRYRRRARRGTRCRAWWSWTYRKYRYAMYSRYATAGGWYGRGGYGYTKYCCGWRRS  | 30720 |
| Bhutan-09027    | WRRRYRRRARRGTRCRAWWSWTYRKYRYAMYSRYATAGGWYGRGGYGYTKYCCGWRRS  | 30720 |
| Bhutan-09030    | WRRRYRRRARRGTRCRAWWSWTYRKYRYAMYSRYATAGGWYGRGGYGYTKYCCGWRRS  | 30720 |
| Bhutan-09005    | WRRAYAARRAGKYGWYRWACTWYRGAAYRCCGTATRYMKSTTRAAATCTCYGCSRAAGG | 30720 |
| Indonesia-88035 | WRRAYAARRAGKYGWYRWACTWYRGAAYRCCGTATCAKSTTRAAATCTCYGCSRAAGG  | 30720 |
| Indonesia-88045 | WRRAYAARRAGKYGWYRWACTWYRGAAYRCCGTATCAKSTTRAAATCTCYGCSRAAGG  | 30720 |
| Indonesia-88065 | WRRAYAARRAGKYGWYRWACTWYRGAAYRCCGTATRYMKSTTRAAATCTCYGCSRAAGG | 30720 |
|                 | *** * * * . * . * . : . . . . .                             |       |
| Bhutan-09015    | STGRSAWCCGYWCGTYRYGGTTAYGCRGTRATGCKYYYYACMSAYTGWYCYSTRMRGKA | 30780 |
| Bhutan-09024    | STGRSAWCCGYWCGTYRYGGTTAYGCRGTRATGCKYYYYACMSAYTGWYCYSTRMRGKA | 30780 |
| Bhutan-09027    | STGRSAWCCGYWCGTYRYGGTTAYGCRGTRATGCKYYYYACMSAYTGWYCYSTRMRGKA | 30780 |
| Bhutan-09030    | STGRSAWCCGYWCGTYRYGGTTAYGCRGTRATGCKYYYYACMSAYTGWYCYSTRMRGKA | 30780 |

|                 |                                                                |       |
|-----------------|----------------------------------------------------------------|-------|
| Bhutan-09005    | GWRAGGWTARYAMRKCGCRRAKWTRYRSTARTATTCCTWTSCSAYWSWCMYMYGMRRTW    | 30780 |
| Indonesia-88035 | GWRAGGWTARTAMRKCGCRRAKWTRYRSKARAATTCCTWTSCSAYWSWCMYMYGMRRTW    | 30780 |
| Indonesia-88045 | GWRAGGWTARTAMRKCGCRRAKWTRYRSKARAATTCCTWTSCSAYWSWCMYMYGMRRTW    | 30780 |
| Indonesia-88065 | GWRAGGWTARYAMRKCGCRRAKWTRYRSKARAATTCCTWTSCSAYWSWCMYMYGMRRTW    | 30780 |
|                 | . . . * . . . : . * . . . * * * . * * * .                      |       |
| Bhutan-09015    | AYRYGTYKYWCYMTSKYSRSGTYRKYMRARRARRRKRGMYYCCATCYCACYRRCYCTAR    | 30840 |
| Bhutan-09024    | AYRYGTYKYWCYMTSKYSRSGTYRKYMRARRARRRKRGMYYCCATCYCACYRRCYCTAR    | 30840 |
| Bhutan-09027    | AYRTGTYKYWCYMTSKYSRSGTYRKYMRARRARRRKRGMYYCCATCYCACYRRCYCTAR    | 30840 |
| Bhutan-09030    | AYRTGTYKYWCYMTSKYSRSGTYRKYMRARRARRRKRGMYYCCATCYCACYRRCYCTAR    | 30840 |
| Bhutan-09005    | RYGTRYKTTTYCRYSGCCASRYCGTTARARRAWGKAKCCMMRYTTTCGCGGYCSAGA      | 30840 |
| Indonesia-88035 | RYGTRYKTTTYCRYSGCCASRYCGTTARARRAWGKAKCCMMRYTTTACYGRYCAAAA      | 30840 |
| Indonesia-88045 | RYGTRYKTTTYCRYSGCCASRYCGTTARARRAWGKAKCCMMRYTTTACYGRYCAAAA      | 30840 |
| Indonesia-88065 | RYGTRYKTTTYCRYSGCCASRYCGTTARARRAWGKAKCCMMRYTTTCGCGGYCCAGA      | 30840 |
|                 | * * * * . * . * * * . . . . .                                  |       |
| Bhutan-09015    | CRWATRKTAGTAGRGYWSASMCGRRAWSTAMGTWAYSAYACRYCKTCTCSMGGRTAWGK    | 30900 |
| Bhutan-09024    | CRWATRKTAGTAGRGYWSASMCGRRAWSTAMGTWAYSAYACRYCKTCTCSMGGRTAWGK    | 30900 |
| Bhutan-09027    | CRWATRKTAGTAGRGYWSASMCGRRAWCTRMGTWAYSAYACRYCKTCTCSMGGRTAWGK    | 30900 |
| Bhutan-09030    | CRWATRKTAGTAGRGYWSASMCGRRAWGTAMGTWAYSAYACRYCKTCTCSMGGRTAWGK    | 30900 |
| Bhutan-09005    | MGTRKATKAWAGGRGACTGGCMYGRGRTCCAMRYWRYGRTTMAYS TKSKYGARRGCCARK  | 30900 |
| Indonesia-88035 | MGTRKATTTWGTGGRGCTGGCMYGRGRTCCAMRYWRYGRTTMAYS TKSKYGARRGCCARG  | 30900 |
| Indonesia-88045 | MGTRKATTTWGTGGRGCTGGCMYGRGRTCCAMRYWRYGRTTMAYS TKSKYGARRGCCARG  | 30900 |
| Indonesia-88065 | MGTRKATKAWAGGRGACTGGCMYGRGRTCCAMRYWRYGRTTMAYS TKSKYGARRGCCARK  | 30900 |
|                 | . . . : . . . * * * . * * : * . . . . .                        |       |
| Bhutan-09015    | YYRWYRGARYYTTCKMTRYRGTTRRKMRTGATARYCKGWYAATWTARGMTGKWKWCCYM    | 30960 |
| Bhutan-09024    | YYRWYRGARYYTTCKMTRYRGTTRRKMRTGATARYCKGWYAATWTARGMTGKWKWCCYM    | 30960 |
| Bhutan-09027    | YYRWYRGARYYTTCKMTRYRGTTRRKMRTGATARYCKGWYRRYWTARGMTGKWKWCCYM    | 30960 |
| Bhutan-09030    | YYRWYRGARYYTTCKMTRYRGTTRRKMRTGATARYCKGWYRRYWTARGMYGKWKWCCYM    | 30960 |
| Bhutan-09005    | TCGTGSRGCTCYTTGCCGTCTTRKRCAGKGMTMATYTGTYAATTCRRRCYAGTGWYYTC    | 30960 |
| Indonesia-88035 | TCGTGSGRCYCYTTGCCGTCTYRRCCKAAKRWYMATYTRTYAATTCRRRCYAGTGWYYTC   | 30960 |
| Indonesia-88045 | TCGTGSGRCYCYTTGCCGTCTYRRCCKAAKRWYMATYTRTYAATTCRRRCYAGTGWYYTC   | 30960 |
| Indonesia-88065 | TCGTGSRGCTCYTTGCCGTCTTRKRCAGKGMTMATYTGTYAATTCRRRCYAGTGWYYTC    | 30960 |
|                 | . . . * * * . . . * . . . * . . .                              |       |
| Bhutan-09015    | TARACTRYTRGACTAAAGARCYRCTRGYCYRAAMATWYTRWYWCAYMGSCTCCRRCTCT    | 31020 |
| Bhutan-09024    | TARACTRYTRGACTAAAGARCYRCTRGYCYRAAMATWYTRWYWCAYMGSCTCCRRCTCT    | 31020 |
| Bhutan-09027    | TARACTRYTRGACTAAAGARCYRCTRGYCYRAAMATWYTRWYWCAYMGSCTCCRRCTCT    | 31020 |
| Bhutan-09030    | TARACTRYTRGACTAAAGARCYRCTRGYCYRAAMATWYTRWYWCAYMGSCTCCRRCTCT    | 31020 |
| Bhutan-09005    | YRGWYRYCRRRTGCCGCGTYAYYRRCYTTGARAWYWTYRWWYSRTATSRYYAACY        | 31020 |
| Indonesia-88035 | TRGWYRYCRRRTGCCGCGRCYAYYRRCYTTGARAWYWTYRWWYSRTATSRYYAACY       | 31020 |
| Indonesia-88045 | TRGWYRYCRRRTGCCGCGRCYAYYRRCYTTGARAWYWTYRWWYSRTATSRYYAACY       | 31020 |
| Indonesia-88065 | YRGWYRYCRRRTGCCGCGTYAYYRRCYTTGARAWYWTYRWWYSRTATSRYYAACY        | 31020 |
|                 | * * * . . . * * * * * . * .                                    |       |
| Bhutan-09015    | GAWYYCARAMTYRRMKYGRKSARWYAATGAGYGAATCA YWRWY YYYWKSATYRWMYCWAY | 31080 |
| Bhutan-09024    | GAWYYCARAMTYRRMKYGRKSARWYAATGAGYGAATCA YWRWY YYYWKSATYRWMYCWAY | 31080 |
| Bhutan-09027    | GAWYYCARAMTYRRMKYGRKSARWYAATGAGYGAATCA YWRWY YYYWKSATYRWMYCWAY | 31080 |
| Bhutan-09030    | GAWYYCARAMTYRRMKYGRKSARWYAATGAGYGAATCA YWRWY YYYWKSATYRWMYCWAY | 31080 |
| Bhutan-09005    | RRTCCMRGGMYCGACGTRAKGRAWTWRYRRCRRWYMCAGWTCTTATRYYGWMCSARC      | 31080 |
| Indonesia-88035 | RRTCCMRGGMTCCGACGTRRKRGRWYAAYRRCRRWYMCAGWTCTTATRYYGWMCSARC     | 31080 |
| Indonesia-88045 | RRTCCMRGGMTCCGACGTRRKRGRWYAAYRRCRRWYMCAGWTCTTATRYYGWMCSARC     | 31080 |
| Indonesia-88065 | RRTCCMRGGMYCGACGTRAKGRAWTWRYRRCRRWYMCAGWTCTTATRYYGWMCSARC      | 31080 |



Bhutan-09027 YWRASTYWGKCYARGTGGAAAYRATMWSKRMYSRCSKGCWAYSAGCRYCMKTCYMR 31440

Bhutan-09030 YWRASTYWGKCYARGTGGAAAYRATMWSKRMYSRCSKGCWAYSAGCRYCMKTCYMR 31440

Bhutan-09005 TTRRCYCWYKTTARCCRRACYRTCTSGRCTCGGMSKKS AWYSRRSGYSCGWSATMRM 31440

Indonesia-88035 TTRRCYCWYKTTARCCRRACYRTCTSGRCTCGGMSKKS AWYSRRSGYSCGWSATMRA 31440

Indonesia-88045 TTRRCYCWYKTTARCCRRACYRTCTSGRCTCGGMSKKS AWYSRRSGYSCGWSATMRA 31440

Indonesia-88065 TTRRCYCWYKTTARCCRRACYRTCTSGRCTCGGMSKKS AWYSRRSGYSCGWSATMRA 31440

\* . \* \*\* \* .\*\* : \* \* . \*\* . \*\* . \* . . \*\*

Bhutan-09015 KRSWAGTTAAAYRCTSAYMAKACACWKKRTRRGKTYTYRCTRYTAGCYATCATYRACARGW 31500

Bhutan-09024 KRSWAGTTAAAYRCTSAYMAKACACWKKRTRRGKTYTYRCTRYTAGCYATCATYRACARGW 31500

Bhutan-09027 KRSWAGTTAAAYRCTSAYMAKACACWKKRTRRGKTYTYRCTRYTAGCYATCATYRACARGW 31500

Bhutan-09030 KRSWAGTTAAAYRCTSAYMAKACACWKKRTRRGKTYTYRCTRYTAGCYATCATYRACARGW 31500

Bhutan-09005 TAGWRGCWWRCCGYASRCMWGTGTATTAYAAATYYTYTAYRTRKRYCWYSCCGRSAGKA 31500

Indonesia-88035 TAGWRGCWWRCCGYASRCMWGTGTATTAYAAATYYTYRTRKRGCCWTCGCCGRSRGKA 31500

Indonesia-88045 TAGWRGCWWRCCGYASRCMWGTGTATTAYAAATYYTYRTRKRGCCWTCGCCGRSRGKA 31500

Indonesia-88065 TAGWRGCWWRCCGYASRCMWGTGTATTAYAAATYYTYTAYRTRKRYCWYSCCGRSAGKA 31500

. .\* . : \* \* . . . \* . . . .

Bhutan-09015 MCMYYTKAMYAYYKGYACWCAYYRGYAWKTAGTRYYGRSWYYTKRAYAWYSYCARYSTM 31560

Bhutan-09024 MCMYYTKAMYAYYKGYACWCAYYRGYAWKTAGTRYYGRSWYYTKRAYAWYSYCARYSTM 31560

Bhutan-09027 MCMYYTKAMYAYYKGYACWCAYYRGYAWKTAGTRYYGRSWYYTKRAYAWYSYCARYSTM 31560

Bhutan-09030 MCMYYTKAMYAYYKGYACWCAYYRGYAWKTAGTRYYGRSWYYTKRAYAWYSYCARYSTM 31560

Bhutan-09005 AYACCTWCCWCYGRYTYTMTTCARYRWTKRSKAGTTKGSATYCKRMYGTTCYTGRCGWM 31560

Indonesia-88035 AYACCTWCCWCYGRYTYTMTTCARYRWTKRSKAGTTKGSATYCKRMYGTTCYTGRCGWM 31560

Indonesia-88045 AYACCTWCCWCYGRYTYTMTTCARYRWTKRSKAGTTKGSATYCKRMYGTTCYTGRCGWM 31560

Indonesia-88065 AYACCTWCCWCYGRYTYTMTTCARYRWTKRSKAGTTKGSATYCKRMYGTTCYTGRCGWM 31560

. . \* : \* \* . . . \* \* \* \* . .\* . \* . \*

Bhutan-09015 YCGTCRTGYWCRRCRKTYYRCWTACWGYAYTWKTGMYRYRWSKYRRCMATCCWGACTWR 31620

Bhutan-09024 YCGTCRTGYWCRRCRKTYYRCWTACWGYAYTWKTGMYRYRWSKYRRCMATCCWGACTWR 31620

Bhutan-09027 YCGTCRTGYWCRRCRKTYYRCWTACWGYAYTWKTGMYRYRWSKYRRCMATCCWGACTWR 31620

Bhutan-09030 YCGTCRTGYWCRRCRKTYYRCWTACWGYAYTWKTGMYRYRWSKYRRCMATCCWGACTWR 31620

Bhutan-09005 YYGWYATGCWMAGRCGKYTTGSTTRYWRYCYTGYKCYGCRTCKYRRCMAYGYTRRMKTR 31620

Indonesia-88035 YYRWYAYRCWMAGAMGTYTTGGTCRYWRTRCYAGYKCYGCATCKYRRCMAYGYTRRMKTR 31620

Indonesia-88045 YYRWYAYRCWMAGAMGTYTTGGTCRYWRTRCYAGYKCYGCATCKYRRCMAYGYTRRMKTR 31620

Indonesia-88065 YYGWYATGCWMAGRCGKYTTGSTTRYWRYCYTGYKCYGCRTCKYRRCMAYGYTRRMKTR 31620

\* \* . \* \* . \* . \*\*\*\* \* . \*

Bhutan-09015 TWYWKYMYRYAARAWWY YRRTTKMRAYSTTKRSWGYRYRKG CYKRTYSGR TTGTRYRR 31680

Bhutan-09024 TWYWKYMYRYAARAWWY YRRTTKMRAYSTTKRSWGYRYRKG CYKRTYSGR TTGTRYRR 31680

Bhutan-09027 TWYWKYMYRYAARAWWY YRRTTKMRAYSTTKRSWGYRYRKG CYKRTYSGR TTGTRYRR 31680

Bhutan-09030 TWYWKYMYRYAARAWWY YRRTTKMRAYSTTKRSWGYRYRKG CYKRTYSGR TTGTRYRR 31680

Bhutan-09005 WWCAKTCTYR YRRGATTTGAWYTAGAMTGYWGGGTSYGC AKRSTGAYMSTGATTYRCGA 31680

Indonesia-88035 WWCAKTCTYR YRRGATTTGAWYTAGAMTGYWGGGTSYGT AKRSTGRYMSGGATTYRYGA 31680

Indonesia-88045 WWCAKTCTYR YRRGATTTGAWYTAGAMTGYWGGGTSYGT AKRSTGRYMSGGATTYRYGA 31680

Indonesia-88065 WWCAKTCTYR YRRGATTTGAWYTAGAMTGYWGGGTSYGC AKRSTGAYMSTGATTYRCGA 31680

\* \* \*\*\* . . . . \* \* : \*

Bhutan-09015 CCWKRRYWSTRKGRMAAAA TRMMYKTMKSRASYRGAYGYATYTGATTYAGTTAWKWRRA 31740

Bhutan-09024 CCWKRRYWSTRKGRMAAAA TRMMYKTMKSRASYRGAYGYATYTGATTYAGTTAWKWRRA 31740

Bhutan-09027 CCWKRRYWSTRKGRMAAAA TRMMYKTMKSRASYRGAYGYATYTGATTYAGTTAWKWRRA 31740

Bhutan-09030 CCWKRRYWSTRKGRMAAAA TRMMYKTMKSRASYRGAYGYATYTGATTYAGTTAWKWRRA 31740

Bhutan-09005 ACTKRRYTGKRG AACWCA YAMATYMTGRWCYRS GYAYWGCKKRCTGCCKRWTGAGR 31740

Indonesia-88035 MTTKRRYWSTRKGRMAAAA TRMMYKTMKSRASYRGAYGYATYTGATTYAGTTAWKWRRA 31740

Indonesia-88045 MTTKRRYWSKRGACWMCAYAMTTYMKGRWCYRSGYAYWGCKKRCTGCCKGWTGAGR 31740  
Indonesia-88065 ACTKRRYTGKRGAACWMCAYAMTTYMTGRWCYRSGYAYWGCKKRCTGCCKRWTGAGR 31740  
\*\*\*\* ..\* . . \* . \*..\* ..\*..\* . . . \*

Bhutan-09015 RMGKCARMWKYIWGWGWCYTTYGRRGTYCATAWWTMMAKRKSARAYCTAWGWYCTKRCA 31800  
Bhutan-09024 RMGKCARMWKYIWGWGWCYKYYGRRGTYCATAWWTMMAKRKSARAYCTAWGWYCTKRCA 31800  
Bhutan-09027 RMGKCARMWKYIWGWGWCYTTYGRRGTYCATAWWTMMAKRKSARAYCTAWGWYCTKRCA 31800  
Bhutan-09030 RMGKCARMWKYIWGWGWCYTTYGRRGTYCATAWWTMMAKRKSARAYCTAWGWYCTKRCA 31800  
Bhutan-09005 GCGKCMAMTGYCWSGTGTMCTTCTAGSWCYAKCATYGMWKRKGRWCGWAKTYWYKGRSR 31800  
Indonesia-88035 GCRKMAAMTGYCWSSTRMCKKCTAGSWCYGKCATYGMWKRKSRWCCWAKTYWYKGRCR 31800  
Indonesia-88045 GCRKMAAMTGYCWSSTRMCKKCTAGSWCYGKCATYGMWKRKSRWCCWAKTYWYKGRCR 31800  
Indonesia-88065 GCGKCMAMTGYCWSGTGTMCKKCTAGSWCYAKCATYGMWKRKGRWCGWAKTYWYKGRSR 31800  
\* \* \* \* . . . . \* \* \* . \* \* . \*

Bhutan-09015 MAMCTCYARWKKKSCACRWYMRRTMGGRTYTWYYTKCCYATAYRYYGCKMKMGMTSSY 31860  
Bhutan-09024 MAMCTCYARWKKKSCACRWYMRRTMGGRTYTWYYTKCCYATAYRYYGCKMKMGMTSSY 31860  
Bhutan-09027 MAMCTCYARWKKKSCACRWYMRRTMGGRTYTWYYTKCCYATAYRYYGCKMKMGMTSSY 31860  
Bhutan-09030 MAMCTCYARWKKKSCACRWYMRRTMGGRTYTWYYTKCCYATAYRYYGCKMKMGMTSSY 31860  
Bhutan-09005 MGYWYMRWKGTSYMMGTTCGAAYCSRAGYWACYKYSYWRTAATYATATTKACCCY 31860  
Indonesia-88035 MGYWYMRWKGTSYMMGTTCGAAYCSRAGYWACYKYSYWRTAATYATATTKACCCY 31860  
Indonesia-88045 MGYWYMRWKGTSYMMGTTCGAAYCSRAGYWACYKYSYWRTAATYATATTKACCCY 31860  
Indonesia-88065 MGYWYMRWKGTSYMMGTTCGAAYCSRAGYWACYKYSYWRTAATYATATTKACCCY 31860  
\* . \* \* \* \* . \* \* \* \* \* . . . . \*

Bhutan-09015 TRAMYRAWGGYYSRCSAAYRKYMGMKKRKCCWSARRCYTTATMRARYMMGYWSAYA 31920  
Bhutan-09024 TRAMYRAWGGYYSRCSAAYRKYMGMKKRKCCWSARRCYTTATMRARYMMGCASAYA 31920  
Bhutan-09027 TRAMYRAWGGYYSRCSAAYRKYMGMKKRKCCWSARRCYTTATMRARYMMGYWSAYA 31920  
Bhutan-09030 TRAMYRAWGGYYSRCSAAYRKYMGMKKRKCCWSARRCYTTATMRARYMMGYWSAYA 31920  
Bhutan-09005 YRRMYRTWSACCCAYSRRYYRGCYMKMGKGGTYT SWGARYYAWWYMRGRYCKKTTCRYR 31920  
Indonesia-88035 YRRMYRTWSACCCAYSRRYYRGCYMKMGKGGTYT SWGARYYAWWYMRGRYCKKTTCRYR 31920  
Indonesia-88045 YRRMYRTWSACCCAYSRRYYRGCYMKMGKGGTYT SWGARYYAWWYMRGRYCKKTTCRYR 31920  
Indonesia-88065 YRRMYRTWSACCCAYSRRYYRGCYMKMGKGGTYT SWGARYYAWWYMRGRYCKKTTCRYR 31920  
\* \* \* \* : \* . . \* \* \* \* \* \* \* \* \* \* \* \* \* \* . \*

Bhutan-09015 CRCCMRGYKTKSTGKTYWARYCRAKTSKGGRTRYRIRAGYYATYKGCMSRWGTWGWGK 31980  
Bhutan-09024 CRCCMRGYKTKSTGKTYWARYCRAKTSKGGRTRYRIRAGYYATYKGCMSRWGTWGWGK 31980  
Bhutan-09027 CRCCMRGYKTKSTGKTYWARYCRAKTSKGGRTRYRIRAGYYATYKGCMSRWGTWGWGK 31980  
Bhutan-09030 CRCCMRGYKTKSTGKTYWARYCRAKTSKGGRTRYRIRAGYYATYKGCMSRWGTWGWGK 31980  
Bhutan-09005 SRSYAGRCTTYKWRGCVWRKYTARGWCSGARYRYACRCGCMCTCGRYCCKRARYAWKK 31980  
Indonesia-88035 SRSYAGRCTTYKWRGCVWRKYTARGWCSGARYRYACRCCTYCMCTCGRYCCKRARYAWKK 31980  
Indonesia-88045 SRSYAGRCTTYKWRGCVWRKYTARGWCSGARYRYACRCCTYCMCTCGRYCCKRARYAWKK 31980  
Indonesia-88065 SRSYAGRCTTYKWRGCVWRKYTARGWCSGARYRYACRCGCMCTCGRYCCKRARYAWKK 31980  
. \* . . \* \* : \* . . \* \* \* . . \* \* \* . \*

Bhutan-09015 GSRCCYSMWMACAGRGKTYKWTTCAARAATKYTARTWARWSKRRWAAGGRYYSRYTWYY 32040  
Bhutan-09024 GSRCCYSMWMACAGRGKTYKWTTCAARAATKYTARTWARWSKRRWAAGGRYYSRYTWYY 32040  
Bhutan-09027 GSRCCYSMWMACAGRGKTYKWTTCAARAATKYTARTWARWSKRRWAAGGRYYSRYTWYY 32040  
Bhutan-09030 GSRCCYSMWMACAGRGKTYKWTTCAARAATKYTARTWARWSKRRWAAGGRYYSRYTWYY 32040  
Bhutan-09005 RSATTSMTMYMSGKKCKTWTYKGTWGRMYTYRRRWGGRWGTGTRRRKRGYTSYGATC 32040  
Indonesia-88035 RSATTSMTMYMSGKKCKTWTYKGTWGRMYTYRRRWGGRWGTGTRRRKRGYTSYGATC 32040  
Indonesia-88045 RSATTSMTMYMSGKKCKTWTYKGTWGRMYTYRRRWGGRWGTGTRRRKRGYTSYGATC 32040  
Indonesia-88065 RSATTSMTMYMSGKKCKTWTYKGTWGRMYTYRRRWGGRWGTGTRRRKRGYTSYGATC 32040  
\* \* \* \* . \* . . \* . . . \* \* \* \* \* \* \* \* \* . \*



|                 |                                                                |       |
|-----------------|----------------------------------------------------------------|-------|
| Bhutan-09015    | YRARCWYAAYYASWRCMGYAMGRTARCGAAKARTTRYGYSGTRGMTYACGTTAGMRCAT    | 32100 |
| Bhutan-09024    | YRARCWYAAYYASWRCMGYAMGRTARCGAAKARTTRYGYSGTRGMTYACGTTAGMRCAT    | 32100 |
| Bhutan-09027    | YRARCWYAAYYASWRCMGYAMGRTARCGAAKARTTRYGYSGTRGMTYACGTTAGMRCAT    | 32100 |
| Bhutan-09030    | YRARCWYAAYYASWRCMGYAMGRTARCGAAKARYRYGYSGTRGMTYACGTTAGMRCAT     | 32100 |
| Bhutan-09005    | TRAGYGTYRRYTMCAAACRTRMRYGATSCRGTATCGYSYGRYAAAKYRSTAGWRMRYMY    | 32100 |
| Indonesia-88035 | TRTGYGTYRRYTMCAAACRTRMRYGATSCRGTATCGYSYGRYAAAKYRSTAGWRMRYMY    | 32100 |
| Indonesia-88045 | TRTGYGTYRRYTMCAAACRTRMRYGATSCRGTATCGYSYGRYAAAKYRSTAGWRMRYMY    | 32100 |
| Indonesia-88065 | TRAGYGTYRRYTMCAAACRTRMRYGATSCRGTATCGYSYGRYAAAKYRSTAGWRMRYMY    | 32100 |
|                 | * : * * . . * . * . . : * . * . . * . : **                     |       |
| Bhutan-09015    | CTMCKKRRKYWTCGWKRAATYRGWRWARYRATCYSAGTTMCRRRRAKSSRGCTSGRKAAT   | 32160 |
| Bhutan-09024    | CTMCKKRRKYWTCGWKRAATYRGWRWARYRATCYSAGTTMCRRRRAKSSRGCTSGRKAAT   | 32160 |
| Bhutan-09027    | CTMCKKRRKYWTCGWKRAATYRGWRWARYRATCYSAGTTMCRRRRAKSSRGCTSGRKAAT   | 32160 |
| Bhutan-09030    | CTMCKKRRKYWTCGWKRAATYRGWRWARYRATCYSAGTTMCRRRRAKSSRGCTSGRKAAT   | 32160 |
| Bhutan-09005    | YGCTKGAGTCAYAAWTARKTGKGWWRWYRKGKYSGSYYMYRGGRCGGGARYWSRAYRRRW   | 32160 |
| Indonesia-88035 | YGCTKGAGTCAYAAWTARKTGKGWWRWYRKGKYSGSYYMYRGGRCGGGARYWSRAYRRRW   | 32160 |
| Indonesia-88045 | YGCTKGAGTCAYAAWTARKTGKGWWRWYRKGKYSGSYYMYRGGRCGGGARYWSRAYRRRW   | 32160 |
| Indonesia-88065 | YGCTKGAGTCAYAAWTARKTGKGWWRWYRKGKYSGSYYMYRGGRCGGGARYWSRAYRRRW   | 32160 |
|                 | * . . * . . * * * . . * . * * * . . *                          |       |
| Bhutan-09015    | RRWRMATCARTTCGCMRYWYKYYRCCYWATAACKYTGYSTATTWRRCSWMMGMTKTTTRTCC | 32220 |
| Bhutan-09024    | RRWRMATCARTTCGCMRYWYKYYRCCYWATAACKYTGYSTATTWRRCSWMMGMTKTTTRTCC | 32220 |
| Bhutan-09027    | RRWRMATCARTTCGCMRYWYKYYRCCYWATAACKYTGYSTATTWRRCSWMMGMTKTTTRTCC | 32220 |
| Bhutan-09030    | RRWRMATCARTTCGCMRYWYKYYRCCYWATAACKYTGYSTATTWRRCSWMMGMTKTTTRTCC | 32220 |
| Bhutan-09005    | AAAGMWAYGRWYYRYCRTYTGTTGGATCWRCWYGTGSCSKCWYTRAYSAAATMGKYAGAGYY | 32220 |
| Indonesia-88035 | AAAGMWAYGRWYYRYCRTYTGTTGGATCWRCWYGTGSCSKCWYTRAYSAAATMGKYAGAGYY | 32220 |
| Indonesia-88045 | AAAGMWAYGRWYYRYCRTYTGTTGGATCWRCWYGTGSCSKCWYTRAYSAAATMGKYAGAGYY | 32220 |
| Indonesia-88065 | AAAGMWACGRWYYRYCRTYTGTTGGMTCWRCWYGTGSCSKCWYTRAYSAAATMGKYAGAGYY | 32220 |
|                 | * : . * * * * * . * . * * * * :                                |       |
| Bhutan-09015    | KYRCSAAWWYWTKYAMYKRSSTGYGMRATRKWACRSYCKCRTYCARCRYCTKRCCTARK    | 32280 |
| Bhutan-09024    | KYRCSAAWWYWTKYAMYKRSSTGYGMRATRKWACRSYCKCRTYCARCRYCTKRCCTARK    | 32280 |
| Bhutan-09027    | KYRCSAAWWYWTKYAMYKRSSTGYGMRATRKWACRSYCKCRTYCARCRYCTKRCCTARK    | 32280 |
| Bhutan-09030    | KYRCSAAWWYWTKYAMYKRSSTGYGMRATRKWACRSYCKCRTYCARCRYCTKRCCTARK    | 32280 |
| Bhutan-09005    | KYKMSRRTATAYGTMCKYKRCYRYRTRRRKGGWRMWTMTSAWCYMASGCTTGRCYTRGG    | 32280 |
| Indonesia-88035 | KYKMSRRTATAYGTMCKYKRCYRYRTRRRKGGWRMWTMTSRTCYCASGCTWGRYCYRGG    | 32280 |
| Indonesia-88045 | KYKMSRRTATAYGTMCKYKRCYRYRTRRRKGGWRMWTMTSRTCYCASGCTWGRYCYRGG    | 32280 |
| Indonesia-88065 | KYKMSRRTATAYGTMCKYKRCYGYRTRRRKGGWRMWTMTSAWCYMASGCTTGRCYTRGG    | 32280 |
|                 | ** : . * . . * * . * . * . . . . *                             |       |
| Bhutan-09015    | TKCRSRRATGARWRMATTGTGKCRKTYTYCRTCSGAWTAAMRGCCRMTYRRWCRYCSTGS   | 32340 |
| Bhutan-09024    | TKCRSRRATGARWRMATTGTGKCRKTYTYCRTCSGAWTAAMRGCCRMTYRRWCRYCSTGS   | 32340 |
| Bhutan-09027    | TKCRSRRATGARWRMATTGTGKCRKTYTYCRTCSGAWTAAMRGCCRMTYRRWCRYCSTGS   | 32340 |
| Bhutan-09030    | TKCRSRRATGARWRMATTGTGKCRKTYTYCRTCSGAWTAAMRGCCRMTYRRWCRYCSTGS   | 32340 |
| Bhutan-09005    | WGTRSSRGGGSRAWAARYTKTKYGTGCWTKYGRRAACRMARYYRCYRGGWYRYSYRG      | 32340 |
| Indonesia-88035 | WGTRSSRGGGSRAWAARYTKTKYGTGCWTKYGRRAACRMARYYRCYRGGWYRYSYRG      | 32340 |
| Indonesia-88045 | WGTRSSRGGGSRAWAARYTKTKYGTGCWTKYGRRAACRMARYYRCYRGGWYRYSYRG      | 32340 |
| Indonesia-88065 | WGTRSSRGGGSRAWAARYTKTKYGTGCWTKYGRRAACRMARYYRCYRGGWYRYSYRG      | 32340 |
|                 | ** . * . . * . * . . . . : . * * * * * .                       |       |
| Bhutan-09015    | YMSARYKWWTYRWRWYMYCYCAMYSRYTCCRSYATTATCAYGAACTYRRGYKTKAMR      | 32400 |
| Bhutan-09024    | YMSARYKWWTYRWRWYMYCYCAMYSRYTCCRSYATTATCAYGAACTYRRGYKTKAMR      | 32400 |
| Bhutan-09027    | YMSARYKWWTYRWRWYMYCYCAMYSRYTCCRSYATTATCAYGAACTYRRGYKTKAMR      | 32400 |
| Bhutan-09030    | YMSARYKWWTYRWRWYMYCYCAMYSRYTCCRSYATTATCAYGAACTYRRGYKTKAMR      | 32400 |

|                 |                                                               |       |
|-----------------|---------------------------------------------------------------|-------|
| Bhutan-09005    | TCCMGCTGAWKTTGRRTTATSYSRMYGRYGTATAGCCYTWCYAYGWWSYTGRRCGKRRMG  | 32400 |
| Indonesia-88035 | TCCMGCTGAWKTTGRRTTATSYSRMYGRYGTATAGCCYACCAYAWWSYTGRRYGGKRRMG  | 32400 |
| Indonesia-88045 | TCCMGCTGAWKTTGRRTTATSYSRMYGRYGTATAGCCYACCWYWWSYTGRRYGGKRRMG   | 32400 |
| Indonesia-88065 | TCCMGCTGAWKTTGRRTTATSYSRMYGRYGTATAGCCYTWCYWYGWWSYTGRRCGTGRRMG | 32400 |
|                 | . * . * . * . * . * . * . * . *                               |       |
| Bhutan-09015    | AYYAATTKGWMAGCYSYRCYRGTCYKGYRAKYKARYRGARCTRCYIMCTGSYGATRYTC   | 32460 |
| Bhutan-09024    | AYYAATTKGWMAGCYSYRCYRGTCYKGYRAKYKARYRGARCTRCYIMCTGSYGRKRYTC   | 32460 |
| Bhutan-09027    | AYYAATTKGWMAGCYSYRCYRGTCYKGYRAKYKARYRGARCTRCYIMCTGSYGRKRYTC   | 32460 |
| Bhutan-09030    | AYYAATTKGWMAGCYSYRCYRGTCYKGYRAKYKARYRGARCTRCYIMCTGSYGATRYTC   | 32460 |
| Bhutan-09005    | RTTTRAYKRWAGSYCCTGMCRKYCTCCGKTRRRTAARGTSWATYCATACGCKATGCYM    | 32460 |
| Indonesia-88035 | ATTTGWYKRWMGSYCCTGMCRKYCYKCCGKTRRRTAARGTSWATYCATACGCKRKGCM    | 32460 |
| Indonesia-88045 | RTTTRAYKRWAGSYCCTGMCRKYCYKCCGKTRRRTAARGTSWATYCATACGCKRKGCM    | 32460 |
| Indonesia-88065 | RTTTRAYKRWAGSYCCTGMCRKYCTCCGKTRRRTAARGTSWATYCATACGCKRKGCM     | 32460 |
|                 | : * * . . . * . : * . * . . * : . .                           |       |
| Bhutan-09015    | SYYYARYCCSGRMGTKAAARMRTYACTGWSWSYCRGAGTYRWACRYYSRYWYTWKCGAY   | 32520 |
| Bhutan-09024    | SYYYARYCCSGRMGTKAAARMRTYACTGWSWSYCRGAGTYRWACRYYSRYWYTWKCGAY   | 32520 |
| Bhutan-09027    | SYYYARYCCSGRMGTKAAARMRTYACTGWSWSYCRGAGTYRWACRYYSRYWYTWKCGAY   | 32520 |
| Bhutan-09030    | SYYYARYCCSGRMGTKAAARMRTYACTGWSWSYCRGAGTYRWACRYYSRYWYTWKCGAY   | 32520 |
| Bhutan-09005    | SYCGACMYSCRATGKRRWAAGYRWMWATGSASYYGMRRTAARGSTYGGTACWTGCGRY    | 32520 |
| Indonesia-88035 | SYCGACMYSCRATGKRRWAAGYRWMWATGSWSYYGMRRTAARGSTYGGTACWTGCGRY    | 32520 |
| Indonesia-88045 | SYCGACMYSCRATGKRRWAAGYRWMWATGSWSYYGMRRTAARGSTYGGTACWTGCGRY    | 32520 |
| Indonesia-88065 | SYCGACMYSCRATGKRRWAAGYRWMWATGSASYYGMRRTAARGSTYGGTACWTGCGRY    | 32520 |
|                 | *** . . * * * . * * * . * . * . *                             |       |
| Bhutan-09015    | RRYYCYAKYCGATATYYGTRTMYATAATGYYYYRYTAYRAAYRRTKAGGTTTCRGTWGW   | 32580 |
| Bhutan-09024    | RRYYCYAKYCGATATYYGTRTMYATAATGYYYYRYTAYRAAYRRTKAGGTTTCRGTWGW   | 32580 |
| Bhutan-09027    | RRYYCYAKYCGATATYYGTRTMYATAATGYYYYRYTAYRAAYRRTKAGGTTTCRGTWGW   | 32580 |
| Bhutan-09030    | RRYYCYAKYCGATATYYGTRTMYATAATGYYYYRYTAYRAAYRRTKAGGTTTCRGTWGW   | 32580 |
| Bhutan-09005    | GGTCYCYRGCCGAWRYCTRGTATATAATGTTCTGTCKWTARRYGAYKTASKTMASYWRA   | 32580 |
| Indonesia-88035 | GGTCYCYRGCCGAWRYCTRGTATATAATGTTCTGTCKWTARRYGAYKTASKTMASYWRA   | 32580 |
| Indonesia-88045 | GGTCYCYRGCCGAWRYCTRGTATATAATGTTCTGTCKWTARRYGAYKTASKTMASYWRA   | 32580 |
| Indonesia-88065 | GGTCYCYRGCCGAWRYCTRGTATATAATGTTCTGTCKWTARRYGAYKTASKTMASYWRA   | 32580 |
|                 | * . . * * * . * * : . . . *                                   |       |
| Bhutan-09015    | TCKKRGTCSSYYSAYTG TARAGRWWRYTGT CMARTRGYRGMATRGGTCATRWRWGRAYK | 32640 |
| Bhutan-09024    | TCKKRGTCSSYYSAYTG TARAGRWWRYTGT CMARTRGYRGMATRGGTCATRWRWGRAYK | 32640 |
| Bhutan-09027    | TCKGAGTCSYYSAYTG TARAGRWWRYTGT CMARTRGYRGMATRGGTCATRWRWGRAYK  | 32640 |
| Bhutan-09030    | TCKKRGTCSSYYSAYTG TARAGRWWRYTGT CMARTRGYRGMATRGGTCATRWRWGRAYK | 32640 |
| Bhutan-09005    | TSGGAACYSYYSWCYRWWAMARTATATYWSYCYGWRKTGGCRSATAKTT CRAATRRTT   | 32640 |
| Indonesia-88035 | YSGGAACYSYYSWCYRWWAMARTATATYWSYCYGWRKTGGCRSATAKTT CRAATRRTT   | 32640 |
| Indonesia-88045 | YSGGAACYSYYSWCYRWWAMARTATATYWSYCYGWRKTGGCRSATAKTT CRAATRRTT   | 32640 |
| Indonesia-88065 | TSGGAACYSYYSWCYRWWAMARTATATYWSYCYGWRKTGGCRSATAKTT CRAATRRTT   | 32640 |
|                 | . . **** . * * . * . . . : * * .                              |       |
| Bhutan-09015    | TCRWYSRYGTTWKRTYWGRCYGYWYCATGYMYWTAACMCMRYRCWMTGTWRYKTAAT     | 32700 |
| Bhutan-09024    | TCRWYSRYGTTWKRTYWGRCYGYWYCATGYMYWTAACMCMRYRCWMTGTWRYKTAAT     | 32700 |
| Bhutan-09027    | TCRWYSRYGTTWKRTYWGRCYGYWYCATGYMYWTAACMCMRYRCWMTGTWRYKTAAT     | 32700 |
| Bhutan-09030    | TCRWYSRYGTTWKRTYWGRCYGYWYCATGYMYWTAACMCMRYRCWMTGTWRYKTAAT     | 32700 |
| Bhutan-09005    | YYRTATCACRWGAGRKTKSRSYATYTYTRYATMYWMMRYMMRCAMAAYRYARTTYRRY    | 32700 |
| Indonesia-88035 | YYRTATCACRWGAGRKTKSRSYATYTYTRYATMYWMMRYMMRCAMAACRTARTTYRRY    | 32700 |
| Indonesia-88045 | YYRTATCACRWGAGRKTKSRSYATYTYTRYATMYWMMRYMMRCAMAACRTARTTYRRY    | 32700 |
| Indonesia-88065 | YYRTATCACRWGAGRKTKSRSYATYTYTRYATMYWMMRYMMRCAMAAYRYARTTYRRY    | 32700 |

\* . . \* . \* \* . \* \* \* \* \* . \*

Bhutan-09015 YMRAGRKMWCRASTTTTKYAGRSYWYTCTYYRTGGRRTCARC MRACYYTGGYWWKARYTYA 32760

Bhutan-09024 YMRAGRKMWCRASTTTTKYAGRSYWYTCTYYRTGGRRTCARC MRACYYTGGYWWKARYTYA 32760

Bhutan-09027 YMRAGRKMWCRASTTTTKYAGRSYWYTCTYYRTGGRRTCARC MRACYYTGGYWWKARYTYA 32760

Bhutan-09030 YMRAGRKMWCRASTTTTKYAGRSYWYTCTYYRTGGRRTCARC MRACYYTGGYWWKARYTYA 32760

Bhutan-09005 CCGRRAKCATGTSAKAKTTSGCYTYYYCYTAYRAGRCTGAYMRGMCKKATPWTRAYWCR 32760

Indonesia-88035 CCGRRAKCATRTGATAKTTSRCYTYYYCYTAYRAGRCTGAYMRGMCKKATPWTRAYWCR 32760

Indonesia-88045 CCGRRAKCATRTSATAKTTSGCYTYYYCYTAYRAGRCTGAYMRGMCKKATPWTRAYWCR 32760

Indonesia-88065 CCGRRAKCATGTSATAKTTSGCYTYYYCYTAYRAGRCTGAYMRGMCKKATPWTRAYWCR 32760

\* :.:.:\* :. \* \* . \* . \* \* . . \* . \*

Bhutan-09015 YWRYAATRKYMSRAYTAGCYCGSKRYTYACGYTRAYRTTCAAYASYTATYAGKARAR 32820

Bhutan-09024 YWRYAATRKYMSRAYTAGCYCGSKRYTYACGYTRAYRTTCAAYASYTATYAGKARAR 32820

Bhutan-09027 YWRYAATRKYMSRAYTAGCYCGSKRYTYACGYTRAYRTTCAAYASYTATYAGKARAR 32820

Bhutan-09030 YWRYAATRKYMSRAYTAGCYCGSKRYTYACGYTRAYRTTCAAYASYTATYAGKARAR 32820

Bhutan-09005 YTACRMWRRYTMSARTKMAATTRGKATWTTWMRYTRGCAWMMRMGTGKWCWRTWARG 32820

Indonesia-88035 YTAYCRMWRRYTMSARTKMAATTRGKATWTTWMRYTRGCAWMMRMGTGKWCWRTWARG 32820

Indonesia-88045 YTAYCRMWRRYTMSARTKMAATTRGKATWTTWMRYTRGCAWMMRMGTGKWCWRTWARG 32820

Indonesia-88065 YTAYCRMWRRYTMSARTKMAATTRGKATWTTWMRYTRGCAWMMRMGTGKWCWRTWARG 32820

\* \* \* \* . . . \* \* \* . . . .

Bhutan-09015 TCAGCYRGYAGKGCYRGTTGWGKMYMGT TAWRTWCAGCYRYMGMSTRAARGTAKYTTRR 32880

Bhutan-09024 TCAGCYRGYAGKGCYRGTTGWGKMYMGT TAWRTWCAGCYRYMGMSTRAARGTAKYTTRR 32880

Bhutan-09027 TCAGCYRGYAGKGCYRGTTGWGKMYMGT TAWRTWCAGCYRYMGMSTRAARGTAKYTTRR 32880

Bhutan-09030 TCAGCYRGYAGKGCYRGTTGWGKMYMGT TAWRTWCAGCYRYMGMSTRAARGTAKYTTRR 32880

Bhutan-09005 WMRSMTRGYTRSGCTCARCCRTRTMTATYRAKYAYMKMCGYMTMCYRRMGRKWKYTKRR 32880

Indonesia-88035 WMRSMTRRYTRSGSTCARCCRTRTMTAGYRAKYAYMKMCGYMTMCYRRMGRKWKYTKRR 32880

Indonesia-88045 WMRSMTRRYTRSGSTCARCCRTRTMTAGYRAKYAYMKMCGYMTMCYRRMGRKWKYTKRR 32880

Indonesia-88065 WMRSMTRGYTRSGCTCARCCRTRTMTATYRAKYAYMKMCGYMTMCYRRMGRKWKYTKRR 32880

. \* \* . . \* : \* \* \* \* . \* \* . \* \*

Bhutan-09015 GARGRYCRTGMYRATKRYKRYTYCTWGCGRRWYRRTTYYYRKGRWWTGAYRCCYSTYYCK 32940

Bhutan-09024 GARGRYCRTGMYRATKRYKRYTYCTWGCGRRWYRRTTYYYRKGRWWTGAYRCCYSTYYCK 32940

Bhutan-09027 GARGRYCRTGMYRATKRYKRYTYCTWGCGRRWYRRTTYYYRKGRWWTGAYRCCYSTYYCK 32940

Bhutan-09030 GARGRYCRTGMYRATKRYKRYTYCTWGCGRRWYRRTTYYYRKGRWWTGAYRCCYSTYYCK 32940

Bhutan-09005 TAGSGYSAWRCCRCYGGYKGTKYTWARGAGAAYGAYWTCTRKRRATWGWCAYYCCCTMG 32940

Indonesia-88035 TMGSGYSAWRCCRCYGGYKGTKYTWARGAGAAYGAYWTCTRKRRATWGWCAYYCCCTMS 32940

Indonesia-88045 TMGSGYSAWRCCRCYGGYKGTKYTWARGAGAAYGAYWTCTRKRRATWGWCAYYCCCTMS 32940

Indonesia-88065 TAGSGYSAWRCCRCYGGYKGTKYTWARGAGAAYGAYWTCTRKRRATWGWCAYYCCCTMG 32940

. \* . \* . \* \* . \* \* \* \* . \*

Bhutan-09015 TWTARRRYACRYAATRCRTTYRRTYRRYRRCYAWYRYGCRGYCTTYYGRCRKRWCCARAGC 33000

Bhutan-09024 TWTARRGTACRYAATRCRTTYRRTYRRYRRCYAWYRYGCRGYCTTYYGRCRKRWCCARAGC 33000

Bhutan-09027 TWTARRGTACRYAATRCRTTYRRTYRRYRRCYAWYRYGCRGYCTTYYGRCRKRWCCARAGC 33000

Bhutan-09030 TWTARRRYACRYAATRCRTTYRRTYRRYRRCYAWYRYGCRGYCTTYYGRCRKRWCCARAGC 33000

Bhutan-09005 CAWMRRGTGYACRRYAYAYTARGTRRCGYMTTWYATRYACCYYYYTTAYTRAYTRAWRY 33000

Indonesia-88035 TATARRGTGYACRRYAYAYTARGTRRCGYMTTWYATRYACCYYYYTTAYTRAYTRAWRY 33000

Indonesia-88045 TATARRGTGYACRRYAYAYTARGTRRCGYMTTWYATRYACCYYYYTTAYTRAYTRAWRY 33000

Indonesia-88065 CAWMRRGTGYACRRYAYAYTARGTRRCGYMTTWYATRYACCYYYYTTAYTRAYTRAWRY 33000

\* \* . \* \* : \* \* \* \* . \*

Bhutan-09015 KMKGRTRGARYAWSTTYTMYAARWCYRWARTCGRGGCYAYYRWRYGRYKYAGSARRYC 33060

Bhutan-09024 KMKGRTRGARYAWSTTYTMYAARWCYRWARTCGRGGCYAYYRWRYGRYKYAGSRRRYC 33060

|                 |                                                              |       |
|-----------------|--------------------------------------------------------------|-------|
| Bhutan-09027    | KMKGRTRGARYAWSTTYTMYAARWCYRWARTCGRGGCYAYYRWRYGRYKYAGSARRYC   | 33060 |
| Bhutan-09030    | KMKGRTRGARYAWSTTYTMYAARWCYRWARTCGRGGCYAYYRWRYGRYKYAGSARRYC   | 33060 |
| Bhutan-09005    | KAGRGTGRWGTTTTSYCCMYRWATYYAWMGYYAGCAGCCTYTAACAGGTGTWRSRGRYY  | 33060 |
| Indonesia-88035 | KAGRGTGRWGTTTTSYCCMYRWATYYAWMGYYAGCAGCCTYTAACAGGTGTWRSRGRYY  | 33060 |
| Indonesia-88045 | KAGRGTGRWGTTTTSYCCMYRWATYYAWMGYYAGCAGCCTYTAACAGGTGTWRSRGRYY  | 33060 |
| Indonesia-88065 | KAGRGTGRWGTTTTSYCCMYRWATYYAWMGYYAGCAGCCTYTAACAGGTGTWRSRGRYY  | 33060 |
|                 | * : * .** * * . . :* . * **                                  |       |
| Bhutan-09015    | AYCCGYKRRRCWMARYTGCRRTCTSCGRYYRGARTRKRWRWRYCATYKRRSYGYGRRR   | 33120 |
| Bhutan-09024    | AYCCGYTARRCCWMARYTGCRRTCTSCGRYYRGARTRKRWRWRYCATYKRRSYGYGRRR  | 33120 |
| Bhutan-09027    | AYCCGYKRRRCWMARYTGCRRTCTSCGRYYRGARTRKRWRWRYCATYKRRSYGYGRRR   | 33120 |
| Bhutan-09030    | AYCCGYTARRCCWMARYTGCRRTCTSCGRYYRGARTRKRWRWRYCATYKRRSYGYGRRR  | 33120 |
| Bhutan-09005    | RTYSKYTAARYYTCRACCAMAGATYYCYRYYRRAGYATRGAGCTSRYCGGACTSCSRGR  | 33120 |
| Indonesia-88035 | RTYSKYTAARYYTCRACCAMAGATYYCYRYYRRAGYATRGAGCTSRYCGGACTSCSRGR  | 33120 |
| Indonesia-88045 | RTYSKYTAARYYTCRACCAMAGATYYCYRYYRRAGYATRGAGCTSRYCGGACTSCSRGR  | 33120 |
| Indonesia-88065 | RTYSKYTAARYYTCRACCAMAGATYYCYRYYRRAGYATRGAGCTSRYCGGACTSCSRGR  | 33120 |
|                 | . * . * . . **** . * . . . * *                               |       |
| Bhutan-09015    | SCCGGWRRRCRWSRSTGGYYAMYARYCYKYWRMKKRMCTWYMYRTYRKRMCGRCSAG    | 33180 |
| Bhutan-09024    | SCCRGGWRRRCRWSRSTGGYYAMYARYCYKYWRMKKRMCTWYMYRTYRKRMCGRCSAG   | 33180 |
| Bhutan-09027    | SYCRRGWRRRCRWSRSTGGYYAMYARYCYKYWRMKKRMCTWYMYRTYRKRMCGRCSAG   | 33180 |
| Bhutan-09030    | SCCGRWRRRCRWSRSTGGYYAMYARYCYKYWRMKKRMCTWYMYRTYRKRMCGRCSAG    | 33180 |
| Bhutan-09005    | CCYGGRRGTGWGAGYKACCMACRRCYCGYKYWRMGKGMYYAYMYRCTTRGGMSKGATCR  | 33180 |
| Indonesia-88035 | CCCAGRARGTGWGAGYKACCMACRRCYCGYKYWRMGKGMYYAYMYRCTTRGGMSKGATCR | 33180 |
| Indonesia-88045 | CCCAGRARGTGWGAGYKACCMACRRCYCGYKYWRMGKGMYYAYMYRCTTRGGMSKGATCR | 33180 |
| Indonesia-88065 | CCCAGRARGYGWGAGYKACCMACRRCYCGYKYWRMGKGMYYAYMYRCTTRGGMSKGATCR | 33180 |
|                 | . * * . . * ***** * * **** * * . : .                         |       |
| Bhutan-09015    | KYTCTGYCYMCRRTCYPATAGCRTTRCGYYGATRGGYARYYARKAWMCTAYYAKYYCMR  | 33240 |
| Bhutan-09024    | KYTCTGYCYMCRRTCYPATAGCRTTRCGYYGATRGGYARYYARKAWMCTAYYAKYYCMR  | 33240 |
| Bhutan-09027    | KYTCTGYCYMCRRTCYPATAGCRTTRCGYYGATRGGYARYYARKAWMCTAYYAKYYCMR  | 33240 |
| Bhutan-09030    | KYTCTGYCYMCRRTCYPATAGCRTTRCGYYGATRGGYARYYARKAWMCTAYYAKYYCMR  | 33240 |
| Bhutan-09005    | GTYGKACYCAGAYYYRYYRYYRKYKTKTKGYAGRTRMGYYRGTRAAMKRCCKWTTYCG   | 33240 |
| Indonesia-88035 | GTYGKACYCAGAYYYRYYRYYRKYKTKTKGYAGRTRMGYYRGTRAAMKRCCKWTTYCG   | 33240 |
| Indonesia-88045 | GTYGKACYCAGAYYYRYYRYYRKYKTKTKGYAGRTRMGYYRGTRAAMKRCCKWTTYCG   | 33240 |
| Indonesia-88065 | GTYGKACYCAGAYYYRYYRYYRKYKTKTKGYAGRTRMGYYRGTRAAMKRCCKWTTYCG   | 33240 |
|                 | . . * . * * . . ** . . *                                     |       |
| Bhutan-09015    | YMACGGTMTTCRCCTCGGGYMRACYWRRWRGCKYGCCYYRARGAKYCRTRKRYWYWRKT  | 33300 |
| Bhutan-09024    | YMACGGTMTTCRCCTCGGGYMRACYWRRWRGCKYGCCYYRARGAKYCRTRKRYWYWRKT  | 33300 |
| Bhutan-09027    | YMACGGTMTTCRCYRGGYMRACYWRRWRGCKYGCCYYRARGAKYCRTRKRYWYWRKT    | 33300 |
| Bhutan-09030    | YMACGGTMTTCRCYRGGYMRACYWRRWRGCKYGCCYYRARGAKYCRTRKRYWYWRKT    | 33300 |
| Bhutan-09005    | YAWYRRWCAGYAYTCGRRCMRRYYTGRWRASTTYRMSTTGRRACKYYRTGAKCACTTAKC | 33300 |
| Indonesia-88035 | YAWYRRWCAGYAYTCGRRCMRRYYTGRWRASTTYRMSTTGRRACKYYRTGAKCACTTAKC | 33300 |
| Indonesia-88045 | YAWYRRWCAGYAYTCGRRCMRRYYTGRWRASTTYRMSTTGRRACKYYRTGAKCACTTAKC | 33300 |
| Indonesia-88065 | YAWYRRWCAGYAYTCGRRCMRRYYTGRWRASTTYRMSTTGRRACKYYRTGAKCACTTAKC | 33300 |
|                 | * : ** * *** . . * . * . * * *                               |       |
| Bhutan-09015    | RCAMWRYYYMARCWWRWRYGMRMRYTGRGCCARYCCTYYGTMKYRSTRRAAYATKYA    | 33360 |
| Bhutan-09024    | RCAMWRYYYMARCWWRWRYGMRMRYTGRGCCARYCCTYYGTMKYRSTRRAAYATKYA    | 33360 |
| Bhutan-09027    | RCAMWRYYYMARCWWRWRYGMRMRYTGRGCCARYCCTYYGTMKYRSTRRAAYATKYA    | 33360 |
| Bhutan-09030    | RCAMWRYYYMARCWWRWRYGMRMRYTGRGCCARYCCTYYGTMKYRSTRRAAYATKYA    | 33360 |
| Bhutan-09005    | GTRAWAYTCCRRYWRWRSTCRRCRYYYARGYSRGYYSYTTYSKMYCACGGWMCYMYKCW  | 33360 |
| Indonesia-88035 | GTRAWAYTCCRRYWRWRSTCRRCRYYYARGYSRGYYSYTTYSKMYCACGGWMCYMYKCW  | 33360 |



Bhutan-09015 TMYKSSYWTAGYSRWWTSAGRKRARRGTWWRYATCYWYACGAGGCTRAGGCAATATATG 33720  
 Bhutan-09024 TMYKSSYWTAGYSRWWTSAGRKRARRGTWWRYATCYWYACGAGGCTRAGGCAATATATG 33720  
 Bhutan-09027 TMYKSSYWTAGYSRWWTSAGRKRARRGTWWRYATCYWYACGAGGCTRAGGCAATATATG 33720  
 Bhutan-09030 TMYKSSYWTAGYSRWWTSAGRKRARRGTWWRYATCYWYACGAGGCTRAGGCAATATATG 33720  
 Bhutan-09005 WACGSCYAYWRYRAAYCGTAGGRGGKWWTRYRWS TCACRCRMSRYYGGRSRMYWKRCA 33720  
 Indonesia-88035 WACGSCYAYWRYRAAYCGTAGGRGGKWWTRYRWS TCACRCRMSRYYGGRSRMYWKRCA 33720  
 Indonesia-88045 WACGSCYAYWRYRAAYCGTAGGRGGKWWTRYRWS TCACRCRMSRYYGGRSRMYWKRCA 33720  
 Indonesia-88065 WACGSCYAYWRYRAAYCGTAGGRGGKWWTRYRWS TCACRCRMSRYYGGRSRMYWKRYR 33720

.. . . . .

Bhutan-09015 YGTTYMYRTSYRAMCTYCKWRYTAA YGRAAYWTRSATGYKGRARYCKCRSRRARAR 33780  
 Bhutan-09024 YGTTYMYRTSYRAMCTYCKWRYTAA YGRAAYWTRSATGYKGRARYCKCRSRRARAR 33780  
 Bhutan-09027 YGTTYMTRTSYRAMCTYCKWRYTAA YGRAAYWTRSATGYKGRARYCKCRSRRARAR 33780  
 Bhutan-09030 YGTTYMYRTSYRAMCTYCKWRYTAA YGRAAYWTRSATGYKGRARYCKCRSRRARAR 33780  
 Bhutan-09005 YRKYATGWSYRRAYKCCCTAY YMMTKGRRCTAWACRWTYGRCKGRCSGYGGGRWARR 33780  
 Indonesia-88035 YGTTYATGTGTGRAYTCMTTAY YAA YGGA ACTAWACGTGTTGACGGACCGTGGGRWARR 33780  
 Indonesia-88045 YGTTYATGTGTGRAYTCMTTAY YAA YGGA ACTAWACGTGTTGACGGACCGTGGGRWARR 33780  
 Indonesia-88065 YRKYATGWSYRRAYKCCCTAY YMMTKGRRCTAWACRWTYGRCKGRCSGYGGGRWARR 33780

\* . \* . . \* . . . . \* \*

Bhutan-09015 TAYRGGWRGRKY YMCYSRWM TTRTATAA YCCCTWWWRYWYWGTSYAGTTRGAGGYR 33840  
 Bhutan-09024 TAYRGGWRGRKY YMCYSRAAM TTRTATAA YCCCTWWWRYWYWGTSYAGTTRGAGGYR 33840  
 Bhutan-09027 TAYRGGWRGRKY YMCYSRWM TTRTATAA YCCCTWWWRYWYWGTSYAGTTRGAGGYR 33840  
 Bhutan-09030 TAYRGGWRGRKY YMCYSRAAM TTRTATAA YCCCTWWWRYWYWGTSYAGTTRGAGGYR 33840  
 Bhutan-09005 KRCKRKKATRSRTC TMYYSRAAAY WAWMYWRY TTYMYAAWAKWSTWKYGYWSWRRRSSCR 33840  
 Indonesia-88035 TACRGGATGGGTCTCYCGAAAAT TATAA YTTCTAAAAT TCTTGTGTAGTTGGAGGCA 33840  
 Indonesia-88045 TACRGGATGGGTCTCYCGAAAAT TATAA YTTCTAAAAT TCTTGTGTAGTTGGAGGCA 33840  
 Indonesia-88065 KRCKRKKATRSRTC TMYYSRAAAY WAWMYWRY TTYMYAAWAKWSTWKYGYWSWRRRSSCR 33840

. \* . . . \* . . . .

Bhutan-09015 GSGAGCCWYKCCAYMRGCCWSAASCYCGCRYKTYRYMYMSTYKARMCCYTAMARRKAM 33900  
 Bhutan-09024 GSGAGCCATGCCAYMRGCCWSAASCYCGCRYKTYRYMYMSTYKARMCCYTAMARRKAM 33900  
 Bhutan-09027 GSGAGCCWYKCCAYMRGCCWSAASCYCGCRYKTYRYMYMSTYKARMCCYTAMARRKAM 33900  
 Bhutan-09030 GSGAGCCWYKCCAYMRGCCWSAASCYCGCRYKTYRYMYMSTYKARMCCYTAMARRKAM 33900  
 Bhutan-09005 KGACKTMWMGYSRCCRTYMTSGSGTMMAMAYTKKYRYAYMGCCGMGMSYYGRCAWGGGGC 33900  
 Indonesia-88035 TGACTTCTAGCCRCCRTYMTSGSGTMMAMAYTKKYRYAYMGCCGMGMSYYGRCAWGGGGC 33900  
 Indonesia-88045 TGACTTCTAGCCRCCRTYMTSGSGTMMAMAYTKKYRYAYMGCCGMGMSYYGRCAWGGGGC 33900  
 Indonesia-88065 KGACKTMWMGYSRCCRTYMTSGSGTMMAMAYTKKYRYAYMGCCGMGMSYYGRCAWGGGGC 33900

... . \* \*..\* . \* \*.\* \*\* . \* . \*

Bhutan-09015 RRYRRWTTTRRRGYKAATKGY YCMYRGWGTAA GRRKYTGRGCGMCWSRRYMGMTWTARRR 33960  
 Bhutan-09024 RRYRRWTTTRRRGYKAATKGY YCMYRGWGTAA GRRKYTGRGCGMCWSRRYMGMTWTARRR 33960  
 Bhutan-09027 RRYRRWTTTRRRGYKAATKGY YCMYRGWGTAA GRRKYTGRGCGMCWSRRYMGMTWTARRR 33960  
 Bhutan-09030 RRYRRWTTTRRRGYKAATKGY YCMYRGWGTAA GRRKYTGRGCGMCWSRRYMGMTWTARRR 33960  
 Bhutan-09005 AGTAAWYWAAARYKGRYKRTY YCTGRWSWGTARYTYRRAMMMWSRRCTCAMYWYTGRR 33960  
 Indonesia-88035 AGTAAWYWAAARYKGRYKRTY YCTGRWSWGTARYTYRRAMMMWSRRCTCAMYWYTGRR 33960  
 Indonesia-88045 AGTAAWYWAAARYKGRYKRTY YCTGRWSWGTARYTYRRAMMMWSRRCTCAMYWYAGRR 33960  
 Indonesia-88065 AGTAAWYWAAARYKGRYKRTY YCTGRWSWGTARYTYRRAMMMWSRRCTCAMYWYTGRR 33960

\* \*\* . \* \* \* . \* \* \* \* \* . \* \* \*\*

Bhutan-09015 TAARCTRRYRRAYWYSCY SYTYGYWYRAACYASTSKRGRSYWRAWMMYWT TSMCASYAC 34020  
 Bhutan-09024 TAARCTRRYRRAYWYSCY SYTYGYWYRAACYASTSKRGRSYWRAWMMYWT TSMCASYAC 34020  
 Bhutan-09027 TAARCTRRYRRAYWYSCY SYTYGYWYRAACYASTSKRGRSYWRAWMMYWT TSMCASYAC 34020  
 Bhutan-09030 TAARCTRRYRRAYWYSCY SYTYGYWYRAACYASTSKRGRSYWRAWMMYWT TSMCASYAC 34020

|                 |                                                                |       |
|-----------------|----------------------------------------------------------------|-------|
| Bhutan-09005    | YRRGYRGTTRRRYTYCYGYTWRTTYRGCTCGSWCKARASCWRMATMTWWCGMYRSCRY     | 34020 |
| Indonesia-88035 | YRRGYRGTTRRRYTYCYGYTWRTTYRGCTCGSWCKARASCWRMATMTWWCGMYRSCRY     | 34020 |
| Indonesia-88045 | YRRGYTRGTTRRRYTYCYGYTWRTTYRGCTCGSWCKARASCWRMATMTWWCGMYRSCRY    | 34020 |
| Indonesia-88065 | YRRGYTRGTTRRRYTYCYGYTWRTTYRGCTCGSWCKARASCWRMATMTWWCGMYRSCRY    | 34020 |
|                 | * * * * . * . * * * * . * * * * * . * *                        |       |
| Bhutan-09015    | WRTYAYRYCGMGAGYKCCCRTTYMYASTCATRWWYTTAWRRAASKARRSWRTRYRTYCG    | 34080 |
| Bhutan-09024    | WRTYAYRYCGMGAGYKCCCRTTYMYASTCATRWWYTTAWRRAASKARRSWRTRYRTYCG    | 34080 |
| Bhutan-09027    | WRTYAYRYCGMGAGYKCCCRTTYMYASTCATRWWYTTAWRRAASKARRSWRTRYRTYCG    | 34080 |
| Bhutan-09030    | WRTYAYRYCGMGAGYKCCCRTTYMYASTCATRWWYTTAWRRAASKARRSWRTRYRTYCG    | 34080 |
| Bhutan-09005    | TRKYRYRTYSCARRYTTMYRYCYTMYGCCCTWRWWTCYWAAAARMSMGRSAGATGWTTTR   | 34080 |
| Indonesia-88035 | TRKYRYRTYSCARRYTTMYRYCYTMYGCCCTWRWWTCYWAAAARMSMGRSAGATGWTTTR   | 34080 |
| Indonesia-88045 | TRKYRYRTYSCARRYTTMYRYCYTMYGCCCTWRWWTCYWAAAAGCSSMGRSAGATGWTTTR  | 34080 |
| Indonesia-88065 | TRKYRYRTYSCARRYTTMYRYCYTMYGCCCTWRWWTCYWAAAAGCSSMGRSAGATGWTTTR  | 34080 |
|                 | * . * * * . . * . * * * * . : * * * * . * * * :                |       |
| Bhutan-09015    | WMMYCRRTMGCIYGWACYRKYYSRMTGRTGAAAYMAKSMWRTCWTCRGYKGSAGMCRGRM   | 34140 |
| Bhutan-09024    | WMMYCRRTMGCIYGWACYRKYYSRMTGRTGAAAYMAKSMWRTCWTCRGYKGSAGMCRGRM   | 34140 |
| Bhutan-09027    | WMMYCRRTMGCIYGWACYRKYYSRMTGRTGAAAYMAKSMWRTCWTCRGYKGSAGMCRGRM   | 34140 |
| Bhutan-09030    | WMMYCRRTMGCIYGWACYRKYYSRMTGRTGAAAYMAKSMWRTCWTCRGYKGSAGMCRGRM   | 34140 |
| Bhutan-09005    | TCMTGTWMASTTRATTCAGTCSMAGKYRRTYRRTSCWATCACTWASCYKKSMAKAYRRAC   | 34140 |
| Indonesia-88035 | TCMTGTWMASTTRATTCAGTCSMAGKYRRTYRRTSCWATCACYWASCYKKSMAKAYRRAC   | 34140 |
| Indonesia-88045 | TCMTGTWMASTTRATTCAGTCSMAGKYRRTYRRTSCWATCACYWASCYKKSMAKAYRRAC   | 34140 |
| Indonesia-88065 | TCMTGTWMASTTRATTCAGTCSMAGKYRRTYRRTSCWATCACYWASCYKKSMAKAYRRAC   | 34140 |
|                 | * . * * . : * * * * . * * * . * * * *                          |       |
| Bhutan-09015    | YKGCWCASRRYRMSRWYAYRGMGYWYYRRCGCYSSTGMYYCAAYSKRGCCRRTRKAWWS    | 34200 |
| Bhutan-09024    | YKGCWCASRRYRMSRWYAYRGMGYWYYRRCGCYSSTGMYYCAAYSKRGCCRRTRKAWWS    | 34200 |
| Bhutan-09027    | YKGCWCASRRYRMSRWYAYRGMGYWYYRRCGCYSSTGMYYCAAYSKRGCCRRTRKAWWS    | 34200 |
| Bhutan-09030    | YKGCWCASRRYRMSRWYAYRGMGYWYYRRCGCYSSTGMYYCAAYSKRGCCRRTRKAWWS    | 34200 |
| Bhutan-09005    | TTRYTAMGAATRCRFRAYRCGRARAYACYGMKYCCCYTMYTTARYSTRAATTRYAAGWWWC  | 34200 |
| Indonesia-88035 | TTRYTAMGAATRCRFRAYRCGRARAYACYGMKYCCCYTMYTTARYSTRAATTRYAAGWWWC  | 34200 |
| Indonesia-88045 | TTRYTAMGAATRCRFRAYRCGRARAYACYGMKYCCCYTMYTTARYSTRAATTRYAAGWWWC  | 34200 |
| Indonesia-88065 | TTRYTAMGAATRCRFRAYRCGRARAYACYGMKYCCCYTMYTTARYSTRAATTRYAAGWWWC  | 34200 |
|                 | . . * * * * * * . . * * * * . * * * . * * *                    |       |
| Bhutan-09015    | YYACCSAGCYRTGCTRYWRRRCAGGGRMYRCGWYYYTTTRWRWRRATYTTTCRRAAYMWY   | 34260 |
| Bhutan-09024    | YYACCSAGCYRTGCTRYWRRRCAGGGRMYRCGWYYYTTTRWRWRRATYTTTCRRAAYMWY   | 34260 |
| Bhutan-09027    | YYACCSAGCYRTGCTRYWRRRCAGGGRMYRCGWYYYTTTRWRWRRATYTTTCRRAAYMWY   | 34260 |
| Bhutan-09030    | YYACCSAGCYRTGCTRYWRRRCAGGGRMYRCGWYYYTTTRWRWRRATYTTTCRRAAYMWY   | 34260 |
| Bhutan-09005    | TTGYSCMAMYACGCARCWTAGYRRKTACCAGTTTCTYWYAAGTMARYTCKWSAAWRTAAY   | 34260 |
| Indonesia-88035 | TTGYSCMAMYACGCARCWTAGYRRKTACCAGTTTCTYWYAAGTMARYTCKWSAAWRTAAY   | 34260 |
| Indonesia-88045 | TTGYSCMAMYACGCARCWTAGYRRKTACCAGTTTCTYWYAAGTMARYTCKWSAAWRTAAY   | 34260 |
| Indonesia-88065 | TTGYSCMAMYACGCARCWTAGYRRKTACCAGTTTCTYWYAAGTMARYTCKWSAAWRTAAT   | 34260 |
|                 | . . . * : * * * * * . .                                        |       |
| Bhutan-09015    | YWCCACACYTMYWGTTSTRYACTMTGKTYCRYRTYGYTRYMSTTKWGRTKYKYSKWRRCGYA | 34320 |
| Bhutan-09024    | YWCCACACYTMYWGTTSTRYACTMTGKTYCRYRTYGYTRYMSTTKWGRTKYKYSKWRRCGYA | 34320 |
| Bhutan-09027    | YACCACACYTMYWGYSTRYACTMTGKTYCRYRTYGYTRYMSTTKWGRTKYKYSKWRRCGYA  | 34320 |
| Bhutan-09030    | YWCCACACYTMYWGTTSTRYACTMTGKTYCRYATGTRYMSTTKWGRTKYKYSKWRRCGYA   | 34320 |
| Bhutan-09005    | YTYMTRMTWMCTATTSATMYMYRKYAACRYTKYATAGYTTTRRYKYCKGKWRGYRYW      | 34320 |
| Indonesia-88035 | YTYMTRMTWMCTATTSATMYMYRKYAACRYTKYATAGYTTTRRYKYCKGKWRGYRYW      | 34320 |
| Indonesia-88045 | YTYMTRMTWMCTATTSATMYMYRKYAACRYTKYATAGYTTTRRYKYCKGKWRGYRYW      | 34320 |
| Indonesia-88065 | YTYMTRMTWMCTATTSATMYMYRKYAACRYTKYATAGYTTTRRYKYCKGKWRGYRYW      | 34320 |

```

* : * . . * * * . . . * * * * * *
Bhutan-09015 YARWRMTYYAYRRYTGRKYMKGTTGKGTAMAWSMRGRCGAYGYTTYYKGCARYMTRK 34380
Bhutan-09024 YARWRMWYYAYRRYTGRKYMKGTTGKGTAMAWSMRGRCGAYGYTTYYKGCARYMTRK 34380
Bhutan-09027 YARWRMWYYACRRYTGRKYMKGTTGKGTAMAWSMRGRCGAYGYTTYYKGCARYMTRK 34380
Bhutan-09030 YARWRMTYYACRRYTGRKYMKGTTGKGTAMAWSMRGRCGAYGYTTYYKGCARYMTRK 34380
Bhutan-09005 YRRWRMTYMTGGCTRRKTATAYKAGACWRWTGCATRYRKYKCTCCYTKAKYGGTTAWRG 34380
Indonesia-88035 YRRARCWTTMTGAYYGGKTATAYKAGACWRWTGCATRYRKYKCTCCYTKAKYGGTTAWRG 34380
Indonesia-88045 YRRARMWYMTGATYGGKTATAYKAGACWRWTGCATRYRKYKCTCCYTKAKYGGTTAWRG 34380
Indonesia-88065 YRRARMWYMTGGCTRRKTATAYKAGACWRWTGCATRYRKYKCTCCYTKAKYGGTTAWRG 34380
* * * * * . . . . . * . * * * . *
Bhutan-09015 AAAGAYRATGSRTAYCKSMYYTMRBYCASAYSYYAYKWAYYRKATMSYGRKRTACRKTGT 34440
Bhutan-09024 AAAGAYRATGSRTAYCKSMYYTMRBYCASAYSYYAYKWAYYRKATMSYGRKRTACRKTGT 34440
Bhutan-09027 AAAGAYRATGSRTAYCKSMYYTMRBYCASAYSYYAYKWAYYRKATMSYGRKRTACRKTGT 34440
Bhutan-09030 AAAGAYRATGSRTAYCKSMYYTMRBYCASAYSYYAYKWAYYRKATMSYGRKRTACRKTGT 34440
Bhutan-09005 RRGRRTGATACRYGYYGSAYYWCRRYSMCTYCTCRCGAWTYRGRCCSTSAGGWRTATWRW 34440
Indonesia-88035 RRGRRTGATACRYGYYGSAYYWCRRYSMCTYCTCRCGAWTYRGRCCSTSAGGWRTATWRW 34440
Indonesia-88045 RRGRRTGATACRYGYYGSAYYWCRRYSMCTYCTCRCGAWTYRGRCCSTSAGGWRTATWRW 34440
Indonesia-88065 RRGRRTGATACRYGYYGSAYYWCRRYSMCTYCTCRCGAWTYRGRCCSTSAGGWRTATWRW 34440
. . * . * * * * * . . : * . * * .
Bhutan-09015 AMWRRKTWAYRKRRTWYAKRAATSKAGTRCTCCRWACGYAKYRYRTAYRGGACCYSAGR 34500
Bhutan-09024 AMWRRKTWAYRKRRTWYAKRAATSKAGTRCTCCRWACGYAKYRYRTAYRGGACCYSAGR 34500
Bhutan-09027 AMWRRKTWAYRKRRTWYAKRAATSKAGTRCTCCRWACGYAKYRYRTAYRGGACCYSAGR 34500
Bhutan-09030 AMWRRKTWAYRKRRTWYAKRAATSKAGTRCTCCRWACGYAKYRYRTAYRGGACCYSAGR 34500
Bhutan-09005 TMTAGGGWRYRKRRTGCWTRTRWRYGTCAWAYATYAARYKCGKCGTAWRYRRRTACSRSG 34500
Indonesia-88035 TMTAGGGWRYRKRRTGCAYRTRWRYGTCAWAYATYAARYKCGKCGTAWRYRRRTACSRSG 34500
Indonesia-88045 TMTAGGGWRYRKRRTGCWYRTRWRYGTCAWAYATYAARYKCGKCGTAWRYRRRTACSRSG 34500
Indonesia-88065 TMTAGGGWRYRKRRTGCATRTRWRYGTCAWAYATYAARYKCGKCGTAWRYRRRTACSRSG 34500
: * * * * * . * . . . : * * * . * .
Bhutan-09015 YTRYARRTYMRRCYWKYGTSAAYMTSWKSKTRYRGTTRKCRTRTGTRYGCAWSWTYYAYC 34560
Bhutan-09024 YTRYARRTYMRRCYWKYGTSAAYMTSWKSKTRYRGTTRKCRTRTGTRYGCAWSWTYYAYC 34560
Bhutan-09027 YTRYARRTYMRRCYWKYGTSAAYMTSWKSKTRYRGTTRKCRTRTGTRYGCAWSWTYYAYC 34560
Bhutan-09030 YTRYARRTYMRRCYWKYGTSAAYMTSWKSKTRYRGTTRKCRTRTGTRYGCAWSWTYYAYC 34560
Bhutan-09005 CKRTMTRACTCAGMYTTTYKYCWRCMYCATSTYGCATGKTRYTRYRTATRYRWGTAYYRCM 34560
Indonesia-88035 CKRYARACTCAGMYTTTYKYSAACMYCATSTYGCATGKTRYWGYRWATRTRTGTAAYGCM 34560
Indonesia-88045 CKRYARACTCAGMYTTTYKYSAACMYCATSTYGCATGKTRYWGYRWATRTRTGTAAYGCM 34560
Indonesia-88065 CKRTMTRACTCAGMYTTTYKYCWRCMYCATSTYGCATGKTRYTRYRTATRYRWGTAYYRCM 34560
. * * * * . * . * . * . . * . . * : * *
Bhutan-09015 RTCATYGRCYMMYMRRTTKRRAKYRYKKSTYMYARMWATTTAAAARWGTGCRYKASRG 34620
Bhutan-09024 RTCATYGRCYMMYMRRTTKRRAKYRYKKSTYMYARMWATTTAAAARWGTGCRYKASRG 34620
Bhutan-09027 RTCATYGRCYMMYMRRTTKRRAKYRYKKSTYMYARMWATTTAAAARWGYGCRYKASRG 34620
Bhutan-09030 RTCATYGRCYMMYMRRTTKRRAKYRYKKSTYMYARMWATTTAAAARWGYGCRYKASRG 34620
Bhutan-09005 AYMATCRGYTMATTCAAAYGGRCKTGTSGCYMYTAGMARCGGRMTTRRTAGYGKTRCAR 34620
Indonesia-88035 AYCATCRGYTMATTCAAAYGGRCKTGTSGCYMYTRGMARCGGRMTTRRTAGYGKTRCAR 34620
Indonesia-88045 AYCWWCRGYTMATTCAAAYGGRCKTGTSGCYMYTRGMARCGGRMTTRRTAGYGKTRCAR 34620
Indonesia-88065 AYMATCRGYTMATTCAAAYGGRCKTGTSGCYMYTRGMAGCGGRMTTRRTAGYGKTRCAR 34620
* : * . * * * * : * * * .
Bhutan-09015 ARCCRARRGAARYGYTAKAYRRRTRAKWYSATAYSSYKTYTRAGTYRSGWYATGCTAG 34680
Bhutan-09024 ARCCRARRGAARYGYTAKAYRRRTRAKWYSATAYSSYKTYTRAGTYRSGWYRTGCTAG 34680

```



Bhutan-09027 ARCCRARRGAARYGYTTAKAYRRTRAKWYSATAYSSYKTYTRAGTYRSGWYATGCTAG 34680

Bhutan-09030 ARCCRARRGAARYGYTTAKAYRRTRAKWYSATAYSSYKTYTRAGTYRSGWYRTGCTAG 34680

Bhutan-09005 GAMAGTAAAWRACRCYKRKRYAGKRMGATCGYRTSCTTYYYRRTYCTASSACAWCSYWS 34680

Indonesia-88035 GAMAGTAAAWRACRCYKRKRYAGKRMGATCGYRTSCTTYYYRRTYCTASSACAWCSYWS 34680

Indonesia-88045 GAMAGTAAAWRACRCYKRKRYAGKRMGATCGYRTSCTTYYYRRTYCTASSACAWCSYWS 34680

Indonesia-88065 GAMAGTAAAWRACRCYKRKRYAGKRMGATCGYRTSCTTYYYRRTYCTASSACAWCSYWS 34680

. : . \* . \* \* \* . \* . . \* . . \* \* \* . .

Bhutan-09015 RTWKRYRCRRWRKAAGRARTGCVYWRACMRYTWWCRAYGSRYAMRSRRWATCGAWCCAT 34740

Bhutan-09024 RTWKRYRCRRWRKARRRARTGCVYWRACMRYTWWCRAYGSRYAMRSRRWATCGAWCCAT 34740

Bhutan-09027 RTWKRYRCRRWRKARRRARTGCVYWRACMRYTWWCRAYGSRYAMRSRRWATCGAWCCAT 34740

Bhutan-09030 RTWKRYRCRRWRKARRRARTGCVYWRACMRYTWWCRAYGSRYAMRSRRWATCGAWCCAT 34740

Bhutan-09005 AYATAYRYGTRKRARRRRYRMCTCRARMAATYWAYARCSGCRMARAAAWYKRTMSRC 34740

Indonesia-88035 AYATAYRYGTRKRARRRRYRMCTCRARMAATYWAYARCSGCRMARAAAWYKRTMSRC 34740

Indonesia-88045 AYATAYRYGTRKRARRRRYRMCTCRARMAATYWAYARCSGCRMARAAAWYKRTMSRC 34740

Indonesia-88065 AYATAYRYGTRKRARRRRYRMCTCRARMAATYWAYARCSGCRMARAAAWYKRTMSRC 34740

. \* \* \* \* \* \* \* \* \* \* \* \* \* \* .

Bhutan-09015 GYYRWYRKYYCMSRATYYAYRTTYMYRKAYACATAYRGYGWYAGYAYTGRIYGYRAYSM 34800

Bhutan-09024 GYYRWYRKYYCMSRATYYAYRYTYMYRKAYACATAYRGYGWYAGYAYTGRIYGYRAYSM 34800

Bhutan-09027 GYYRWYRKYYCMSRATYYAYRYTYMYRKAYACATAYRGYGWYAGYAYTGRIYGYRAYSM 34800

Bhutan-09030 GYYRWYRKYYCMSRATYYAYRYTYMYRKAYACATAYRGYGWYAGYAYTGRIYGYRAYSM 34800

Bhutan-09005 ACTRWYRTCYSACAMWYRYGYGYACRKRCTWYRCGRRCRCWMSPTYKACYTCRACCC 34800

Indonesia-88035 ACTRWYRTCYSACAMWYRYGYGYACRKRCTWYRCGRRCRCWMSPTYKACYTCRACCC 34800

Indonesia-88045 ACTRWYRTCYSACAMWYRYGYGYACRKRCTWYRCGRRCRCWMSPTYKACYTCRACCC 34800

Indonesia-88065 ACTRWYRTCYSACAMWYRYGYGYACRKRCTWYRCGRRCRCWMSPTYKACYTCRACCC 34800

. \* \* \* \* \* \* \* \* \* \* \* \* \* \* .

Bhutan-09015 RWCRTAGMGKTYWAWACRRRYCYMRASMYGRTTTCMSCTKACAGWYRCSYWYARAYKKG 34860

Bhutan-09024 RWCRTAGMGKTYWAWACRRRYCYMRASMYGRTTTCMSCTKACAGWYRCSYWYARAYKKG 34860

Bhutan-09027 RWCRTAGMGKTYWAWACRRRYCYMRASMYGRTTTCMSCTKACAGWYRCSYWYARAYKKG 34860

Bhutan-09030 RWCRTAGMGKTYWAWACRRRYCYMRASMYGRTTTCMSCTKACAGWYRCSYWYARAYKKG 34860

Bhutan-09005 GAYAKGRCSGWTWCTWYGAMYCYGCCCTRAYACGMGMWTGMGRWGTGYSWCYWRCKKT 34860

Indonesia-88035 GAYAKGRCSGWTWCTWYGAMYCYGCCCTRAYACGMGMWTGMGRWGTGYSWCYWRCKKT 34860

Indonesia-88045 GAYAKGRCSGWTWCTWYGAMYCYGCCCTRAYACGMGMWTGMGRWGTGYSWCYWRCKKT 34860

Indonesia-88065 GAYAKGRCSGWTWCTWYGAMYCYGCCCTRAYACGMGMWTGMGRWGTGYSWCYWRCKKT 34860

. . . \* . \* . . : \* . . . \* \* \* \* \* .

Bhutan-09015 RGGTARRTAWRRTYYGASYMAYMYYYMCTGRGYRKSRTCTMTWWYATAYAMARKYAW 34920

Bhutan-09024 RGGTARRTAWRRTYYGASYMAYMYYYMCTGRGYRKSRTCTMTWWYATAYAMARKYAW 34920

Bhutan-09027 RGGTARRTAWRRTYYGASYMAYMYYYMCTGRGYRKSRTCTMTWWYATAYAMARKYAW 34920

Bhutan-09030 RGGTARRTAWRRTYYGASYMAYMYYYMCTGRGYRKSRTCTMTWWYATAYAMARKYAW 34920

Bhutan-09005 AKAWRAGWWRRWCTSWGCMRYACTCTMYCAASYATSRYSYMYTATCYGYRMWAGCRA 34920

Indonesia-88035 AKAWRAGWWRRWCTSWGCMRYACTCTMYCAASYATSRYSYMYTATCYGYRMWAGCRA 34920

Indonesia-88045 AKAWRAGWWRRWCTSWGCMRYACTCTMYCAASYATSRYSYMYTATCYGYRMWAGCRR 34920

Indonesia-88065 AKAWRAGWWRRWCTSWGCMRYACTCTMYCAASYATSRYSYMYTATCYGYRMWAGCRA 34920

. \* \* \* . . \* \* \* \* \* . \* . \* . \* . \* \* \* .

Bhutan-09015 TTYMMMMYGRSTTASTCRSYWAGKTRTTTRWCTTRWSMSMKYMGKMRACWYRGAARW 34980

Bhutan-09024 TTYMMMMYGRSTTASTCRSYWAGKTRTTTRWCTTRWSMSMKYMGKMRACWYRGAARW 34980

Bhutan-09027 TTYMMMMYGRSTTASTCRSYWAGKTRTTTATCTTRWSMSMKYMGKMRACWYRGAARW 34980

Bhutan-09030 TTYMMMMYGRSTTASTCRSYWAGKTRTTTRWCTTRWSMSMKYMGKMRACWYRGAARW 34980

Bhutan-09005 YCTTMMACYARSKYGCYMRGTWRSTKRKYATCYGWSMSMKTMTCARWMTTCAAWMRW 34980

Indonesia-88035 YCTTMMACYARSKYGCYMRGTWRSTKRKYATCYGWSMSMKTMTCARWMTTCAAWMRW 34980



Bhutan-09015      ARRRKGGATMYSTMTCCTCRYWRMATRRYYGKSYTTTRWGRSKGTAKYAAACRRYKTMGAR 35340  
 Bhutan-09024      ARRRKGGATMYSTMTCCTCRYWRMATRRYYGKSYTTTRWGRSKGTAKYAAACRRYKTMGAR 35340  
 Bhutan-09027      ARRRKGGATMYSTMTCCTCRYWRMATRRYYGKSYTTTRWGRSKGTAKYAAACRRYKTMGAR 35340  
 Bhutan-09030      ARRRKGGATMYSTMTCCTCRYWRMATRRYYGKSYTTTRWGRSKGTAKYAAACRRYKTMGAR 35340  
 Bhutan-09005      WRRGTTKKMYCYCYCYSYYGTWAAWYAATGGGGYKWAARGGKKYRGYRGMYYRKYARRA 35340  
 Indonesia-88035    AAAGTGGATCYCTCTCTCGTTAAATAAATSSGGTCKTAAGGGGKYRGTAGACAGTGTAGAA 35340  
 Indonesia-88045    AAAGTGGATCYCTCTCTCGTTAAATAAATSSGGTCKTAAGGGGKYRGTAGACAGTGTAGAA 35340  
 Indonesia-88065    WRRGTTKKMYCYCYCYSYYGTWAAWYAATGGGGYKWAARGGKKYRGYRGMYYRKYCARRA 35340

. \* . . . . .

Bhutan-09015      RYRGAKTWTWKKRGTCYRAGACGGTRATCCTGYTTCYRKYWYCYGCTGYCYCGYCGTAS 35400  
 Bhutan-09024      RYRBMKTWTWKKRGTCYRAGACGGTRATCCTGYTTCYRKYWYCYGCTGYCYCKYCGTAS 35400  
 Bhutan-09027      RYRBMKTWTWKKRGTCYRAGACGGTRATCCTGYTTCYRKYWYCYGCTGYCYCKYCGTAS 35400  
 Bhutan-09030      RYRBMKTWTWKKRGTCYRAGACGGTRATCCTGYTTCYRKYWYCYGCTGYCYCGYCGTAS 35400  
 Bhutan-09005      RYRGAGWAWTKKARWMYRRRYYRYYARYCCYKTTYRYATWYYRRTASYRCTCKYAAATRC 35400  
 Indonesia-88035    ACAGAGTATTTGAGTCCRAGACGRTAATYYTGTTTGCCATYYYYGTACTGTCKYAAAWAC 35400  
 Indonesia-88045    ACAGAGTATTTGAGTCCRAGACGRTAATYYTGTTTGCCATYYYYGTACTGTCKYAAAWAC 35400  
 Indonesia-88065    RYRGAGWAWTKKARWMYRRRYYRYYARYCCYKTTYRYATWYYRRTASYRCTCKYAAATRC 35400

. \* . \*\* . . \* . . .

Bhutan-09015      TGICYKRRASWWKWYCYKTCGCGWCWAGCCGAGARGSARCACGRWRACYCMGYAAATYTCRGR 35460  
 Bhutan-09024      TGICYKRRASWWKWYCYKTCGCGWCWAGCCGAGARGSARCACGRWRACYCMGYAAATYTCRGR 35460  
 Bhutan-09027      TGICYKRRASWWKWYCYKTCGCGWCWAGCCGAGARGSARCACGRWRACYCMGYAAATYTCRGR 35460  
 Bhutan-09030      TGICYKRRASWWKWYCYKTCGCGWCWAGCCGAGARGSARCACGRWRACYCMGYAAATYTCRGR 35460  
 Bhutan-09005      YRTTKAAAGTAGATCTGYYYRWYWWMMGWKRARGRAYAMGRATWSTTMKTWRKTYGRA 35460  
 Indonesia-88035    TRTTKAAAGTAGATYTGTCGCGWCAAGCCKAGAAGGAACMRATAACTTMTGTAATWCGGA 35460  
 Indonesia-88045    TGTTKAAAGTAGATYTGTCGCGWCAAGCCKAGAAGGAACMRATAACTTMTGTAATWCGGA 35460  
 Indonesia-88065    YRTTKAAAGTAGATCTGYYYRWYWWMMGWKRARGRAYAMGRATWSTTMKTWRKTYGRA 35460

\* . \* . . \*

Bhutan-09015      RWMYMGCMWMTGWRMAGATRKKKWMYTMCCATAYTASYYGWTTTKMTRTKYACGTACTAA 35520  
 Bhutan-09024      RWMYMGCMWMTGWRMAGATRKKKWMYTMCCATAYTASYYGWTTTKMTRTKYACGTACTAA 35520  
 Bhutan-09027      RWMYMGCMWMTGWRMAGATRKKKWMYTMCCATAYTASYYGWTTTKMTRTKYACGTACTAA 35520  
 Bhutan-09030      RWMYMGCMWMTGWRMAGATRKKKWMYTMCCATAYTASYYGWTTTKMTRTKYACGTACTAA 35520  
 Bhutan-09005      AACTMRYTMCWSAACGRAYAGTGTACAYMRCGKWKCTTKTTTCGTATAYKYRYGYAYKRR 35520  
 Indonesia-88035    AACTCGCTMCWGWACGGWTAGTGTCAAACCACGKWKSTTGTTCGTATATYACGCWYKAA 35520  
 Indonesia-88045    AACTCGCTMCWGWACGGWTAGTGTCAAACCACGKWKSTTGTTCGTAKATYACGCWYKAA 35520  
 Indonesia-88065    AACTMRYTMCWSAACGRAYAGTGTACAYMRCGKWKCTTKTYCGTATAYKYRYGYAYKRR 35520

\* . . . . \*

Bhutan-09015      RRMWCCCRSCRWTARKRRACTYRRAACGYGGTTYWRRWYTYTYASRCSMCMYYRRGGG 35580  
 Bhutan-09024      RRMWCCCRSCRWTARKRRACTYRRAACGYGGTTYWRRWYTYTYASRCSMCMYYRRGGG 35580  
 Bhutan-09027      RRMWCCCRSCRWTARKRRACTYRRAACGYGGTTYWRRWYTYTYASRCSMCMYYRRGGG 35580  
 Bhutan-09030      RRMWCCCRSCRWTARKRRACTYRRAACGYGGTTYWRRWYTYTYASRCSMCMYYRRGGG 35580  
 Bhutan-09005      RRAWYTYTASYATAARRTGRMYTGRMYRCCGTYWYTARWCYTKYRSRYCSTACCARRRK 35580  
 Indonesia-88035    GAATYTYTASYATAAAATGRMYTGAACGCKTTTTTAAACTTTTACGYCCTACCAAGGG 35580  
 Indonesia-88045    GAATYTYTASYATAAAATGRMYTGAACGCKTTTTTAAACTTTTACGYCCTACCAAGGG 35580  
 Indonesia-88065    RRAWYTYTASYATAARRTGRMYTGRMYRCCGTYWYTARWCYTKYRSRYCSTACCARRRK 35580

\* : . \*

Bhutan-09015      YMWKARWAGATWWKKAAGMYRTTGGCYSGYRCRYRAKGYMTATAKYGCRRCWWRWYKWA 35640  
 Bhutan-09024      YMWKARWAGATWWKKAAGMYRTTGGCYSGYRCRYRAKGYMTATAKYGCRRCWWRWYKWA 35640  
 Bhutan-09027      YMWKARWAGATWWKKAAGMYRTTGGCYSGYRCRYRAKGYMTATAKYGCRRCWWRWYKWA 35640  
 Bhutan-09030      YMWKARWAGATWWKKAAGMYRTTGGCYSGYRCRYRAKGYMTATAKYGCRRCWWRWYKWA 35640

Bhutan-09005 YATKWGWRKWKYWAKKRWKMYRYWKSTYSRTRMACARTCTYAYWTRGYKYGGTATATCTR 35640  
Indonesia-88035 TATTAGAAGATAAATGAAGCTATTGGYTGGMACAATCTCATWKRGYGCYGYATATCTR 35640  
Indonesia-88045 TATTAGAAGATAAATGAAGCTATTGGYTGGMACAATCTCATWKGGYGCYGYATATCTR 35640  
Indonesia-88065 YATKWGWRKWKYWAKKRWKMYRYWKSTYSRTRMACARTCTYAYWTRGYKYGGTATATCTR 35640  
. . . . . \*

Bhutan-09015 RRRRRYCGWRRRYTAYRRRYRCTTGKMACYRTYYRRTTCKMAGRMSKRYCTARMATAMY 35700  
Bhutan-09024 RRRRRYCGWRRRYTAYRRRYRCTTGKMACYRTYYRRTTCKMAGRMSKRYCTARMATAMY 35700  
Bhutan-09027 RRRRRYCGWRRRYTAYRRRYRCTTGKMACYRTYYRRTTCKMAGRMSKRYCTARMATAMY 35700  
Bhutan-09030 RRRRRYCGWRRRYTAYRRRYRCTTGKMACYRTYYRRTTCKMAGRMSKRYCTARMATAMY 35700  
Bhutan-09005 RRRRTTYRTGGRYWWYGAAYGYWRTARYRKCCRRWYKCKWKAACGGCYMRAWKWAY 35700  
Indonesia-88035 RAAAATTCGTGGGCTACGAAYGCTGTAACTAKCCAATYCTCAGAACGGCTAAAATAAT 35700  
Indonesia-88045 RAAAATTCGTGGGCTACGAAYGCTGTAACTATCCAATYCTCAGAACGGCTAAAATAAT 35700  
Indonesia-88065 RRRRTTYRTGGRYWWYGAAYGYWRTARYRTCCRRWYKCKWKAACGGCYMRAWKWAY 35700  
\* \* . . . . .

Bhutan-09015 RWRRCYMAKYKTCRYTYMRASYTTCACKGTTTRTCMAWYRYYYYMTRGRRCRRRGRYGS 35760  
Bhutan-09024 RWRRCYMAKYKTCRYTYMRASYTTCACKGTTTRTCMAWYRYYYYMTRGRRCRRRGRYGS 35760  
Bhutan-09027 RWRRCYMAKYKTCRYTYMRASYTTCACKGTTTRTCAAWYRYYYYMTRGRRCRRRGRYGS 35760  
Bhutan-09030 RWRRCYMAKYKTCRYTYMRASYTTCACKGTTTRTCMAWYRYYYYMTRGRRCRRRGRYGS 35760  
Bhutan-09005 RWGGASTMMKCKYMRCCYMGMSYCYSRMKGKTKRYCRWYGCYTYMGAKGGYGRRCRTRG 35760  
Indonesia-88035 GTGGASTMMKCKTCACTCAGASTCTCACTRTYKRYCRWYGCYTYMGAKGGYGRRCRTRG 35760  
Indonesia-88045 GTGGASTMMKCKTCACTCAGASTCTCACTRTYKRYCRWYGCYTYMGAKGGYGRRCRTRG 35760  
Indonesia-88065 RWGGASTMMKCKYMRCCYMGMSYCYSRMKGKTKRYCRWYGCYTYMGAKGGYGRRCRTRG 35760  
. \* \* \* \* . . . . \* \* \* \* \* .

Bhutan-09015 AATYYGKATRYAGRAGYRRWTCGMYGCCYTGKCGWYWGKGRAGRWRKYKATGARMC 35820  
Bhutan-09024 AATYYGKATRYAGRAGYRRWTCRCMYGCCYTGKCGWYWGKGRAGRWRKYKATGARMC 35820  
Bhutan-09027 AATYYGKATACAGRAGYRRWTCRCMYGCCYTGKCGWYWGKGRAGRWRKYKATGARMC 35820  
Bhutan-09030 AATYYGKATACAGRAGYRRWTCRCMYGCCYTGKCGWYWGKGRAGRWRKYKATGARMC 35820  
Bhutan-09005 RCWYKTRWGTCACTCAAAYTGMATKYTYTGGY SARYAAAKARMRAAGCKRGTTGGM 35820  
Indonesia-88035 RCTYYKTRWGTCACTCAAAYTGMATKYTYTGGY SARYAAAKAGCRRRAAGCKGGTTGGM 35820  
Indonesia-88045 RCTYYKTRWGTCACTCAAAYTGMATKYTYTGGY SARYAAAKARMRAAGCKGGTTGGM 35820  
Indonesia-88065 RCWYKTRWGTCACTCAAAYTGMATKYTYTGGY SARYAAAKARMRAAGCKRGTTGGM 35820  
. \* \* . . \* . \* \* \* . \* \* \* .

Bhutan-09015 CCGSWMKMGATTTGRGSSWYTMCAYYAYSYSYKYGRRCGCWWMAGSYMYARTTCGMMR 35880  
Bhutan-09024 CCGSWMKMGATTTGRGSSWYTMCAYYAYSYSYKYGRRCGCWWMAGSYCYARTTCGMMR 35880  
Bhutan-09027 CCGSWMKMGATTTGRGSSWYTMCAYYAYSYSYKYGRRCGCWWMAGSYMYARTTCGMMR 35880  
Bhutan-09030 CCGSWMKMGATTTGRGSSWYTMCAYYAYSYSYKYGRRCGCWWMAGSYCYARTTCGMMR 35880  
Bhutan-09005 TTAGTTKMCCCCCTGRCWYCCYWYTYTSCYKYCRRGTAAAACCAGCCYMRGASRCMR 35880  
Indonesia-88035 TTAGTTKMCCCCCTGRCWYCCYWYTYTSCYKYCRRGTAAAACCAGCCYMRGASRCMR 35880  
Indonesia-88045 TTAGTTKMCCCCCTGRCWYCCYWYTYTSCYKYCRRGTAAAACCAGCCYMRGASRCMR 35880  
Indonesia-88065 TTAGTTKMCCCCCTGRCWYCCYWYTYTSCYKYCRRGTAAAACCAGCCYMRGASRCMR 35880  
. . \* \* . . \* \* \* \* \* \* \* \* \* \* . . \* \* .

Bhutan-09015 RYYMRGWYTAWTATTAGTYATTMWTYYRRTCYTACCMRCTTTACCYACCATCRACYA 35940  
Bhutan-09024 RYYMRGWYTAWTATTAGTYATTMWTYYRRTCYTACCMRCTTTACCYACCATCRACYA 35940  
Bhutan-09027 RYYMRGWYTAWTATTAGTYATTMWTYYRRTCYTACCMRCTTTACCYACCATCRACYA 35940  
Bhutan-09030 RYYMRGWYTAWTATTAGTYATTMWTYYRRTCYTACCMRCTTTACCYACCATCRACYA 35940  
Bhutan-09005 GTYMGATCTWMTACGATRCCMYWWWCTCAGCYTYRYRYRYRYRYRYRYRYRYRYRYRY 35940  
Indonesia-88035 GTYMGATCTWMTACGATRCCAYWWWCTCAGCYTYRYRYRYRYRYRYRYRYRYRYRYRY 35940  
Indonesia-88045 GTYMGATCTWMTACGATRCCAYWWWCTCAGCYTYRYRYRYRYRYRYRYRYRYRYRYRY 35940  
Indonesia-88065 GTYMGATCTWMTACGATRCCMYWWWCTCAGCYTYRYRYRYRYRYRYRYRYRYRYRYRY 35940

\*\* . :. :: \* \* \* \* \*

Bhutan-09015 GYACWRKRTRYGATRRYGACTYAGARTCAKAARGRKATCTYRKMYCRRKKMMYYAYYWR 36000  
 Bhutan-09024 GYACWRKRTRYGATRRYGACTYAGARTCAKAARGRKATCTYRKMYCRRKKMMYYAYYWR 36000  
 Bhutan-09027 GYACWRKRTRYGATRRYGACTYAGARTCAKAARGRKATYKYRKMYCRRKKMMYYAYYWR 36000  
 Bhutan-09030 GYACWRKRTRYGATRRYGACTYAGARTCAKAARGRKATYKYRKMYCRRKKMMYYAYYWR 36000  
 Bhutan-09005 RYTTTAKRAGCCSGGARYRMYACTARGAYCGRMRAATRCCTTRKCTYGGKKAACYRTCTG 36000  
 Indonesia-88035 RYTTTAKRAGCCSGGARYRMYACTARGAYCGRARAATRCCTTRKCTCGGKKAACYRTCTG 36000  
 Indonesia-88045 RYTTTAKRAGCCSGGARYRMYACTARGAYCGRARAATRCCTTRKCTCGGKKAACYRTCTG 36000  
 Indonesia-88065 RYTTTAKRAGCCSGGARYRCYACTARGAYCGRARAATRCCTTRKCTYGGKKAACYRTCTG 36000

\* : \*\* : .. \*\* : : . : . \* . . . \*\* \*\* \*

Bhutan-09015 YSKWAYYTGYTYAWTSWMSWYTYRARRRRTARRCMARCAACYKGCKSYGGSYAGMRAWWG 36060  
 Bhutan-09024 YSKWAYYTGYTYAWTSWMSWYTYRARRRRTARRCMARCWWCYKGCKSYGGSYAGMRAWWG 36060  
 Bhutan-09027 YSKWAYYTGYTYAWTSWMSWYTYRARRRRTARRCMARCWWCYKGCKSYGGSYAGMRAWWG 36060  
 Bhutan-09030 YSKWAYYTGYTYAWTSWMSWYTYRARRRRTARRCMARCWWCYKGCKSYGGSYAGMRAWWG 36060  
 Bhutan-09005 YCKAGYCYKTCCYGWCSWGWKYGGGGGYYCAGYARRYAATYGGMGCYSRGCWRMGMTTR 36060  
 Indonesia-88035 YCKAGYCYKTCCYGWCSWGWKYGGGGGYYCAGYARRYAATYGGMGCYSRGCWRMGMTTR 36060  
 Indonesia-88045 YCKAGYCYKTCCYGWCSWGWKYGGGGGYYCAGYAGRYAWTYGGMGCYSRGCWRMGMTTR 36060  
 Indonesia-88065 YCKAGYCYKTCCYGWCSWGWKYGGGGGYYCAGYARRYAWTYGGMGCYSRGCWRMGMTTR 36060

\* . \* \* \* \* \* . \* \* . \* . \*

Bhutan-09015 YTATRGRYYYYGGKYYRRAYWAARMATRYGRMWRRRRGAGYKTCYYGCGAMRRMTACW 36120  
 Bhutan-09024 YTATRGRYYYYGGKYYRRAYWAARMATRYGRMWRRRRGAGYKTCYYGCGAMRRMTACW 36120  
 Bhutan-09027 YTATRGRYYYYGGKYYRRAYWAARMATRYGRMWRRRRGAGYKTCYYGCGAMRRMTACW 36120  
 Bhutan-09030 YTATRGRYYYYGGKYYRRAYWAARMATRYGRMWRRRRGAGYKTCYYGCGAMRRMTACW 36120  
 Bhutan-09005 CYRKAKGCTTTRRGTYRGCAGGMRGCGYKAAAAGAGRWRYTYGCCTTCAMRGTAGCTA 36120  
 Indonesia-88035 CYAKAKGCTTTRRGTYRGCARRGMRGCGYKAAAAGAGRWRYTYGCCTTCAMRGTAGCTA 36120  
 Indonesia-88045 CYAKAKGCTTTRRGTYRGCARRGMRGCGYKAAAAGAGRWRYTYGCCTTCAMRGTAGCTA 36120  
 Indonesia-88065 CYRGAAGCTTTRRGTYRGCAGGMRGCGYKAAAAGAGRWRYTYGCCTTCAMRGTAGCTA 36120

\*\*\* \* \* \* . . . \*\* . .

Bhutan-09015 YKAYRKMSRCAKAMKGARYCYAYYCGCYMWCCRYKRYKSYCRSKRRYSYRYWYCRAG 36180  
 Bhutan-09024 YKAYRKMSRCAKAMKGARYCYAYYCGCYMWCCACKRYKSYCRSKRRYSYRYWYCRAG 36180  
 Bhutan-09027 YKAYRKMSRCAKAMKGARYCYAYYCGCYMWCCACKRYKSYCRSTRYSYRYWYCRAG 36180  
 Bhutan-09030 YKAYRKMSRCAKAMKGARYCYAYYCGCYMWCCACKRYKSYCRCTRYSYRYWYCRAG 36180  
 Bhutan-09005 TGRYRKAGGYRGGCKGARYAYGYRACYMATTACKGCTYYSSKAATCATAYTWYTRRA 36180  
 Indonesia-88035 TGRYRKAGGYRGGCKGAGYAYGYRACYMATTACKGCTYYSSKAATCATAYTWYTRRA 36180  
 Indonesia-88045 TGRYRKAGGYRGGCKSWRYAYGYRACYMATTACKGCTYYSSKAATCATAYTWYTRRA 36180  
 Indonesia-88065 TGRYRKAGGYRGGCKGARYAYGYRACYMATTACKGCTYYSSKAATCATAYTWYTRRA 36180

\*\*\* . \* \* \* . \* \* \* . \* \* . . \* .

Bhutan-09015 RGYRGRYSRWGWKKKGTAGYSSCSAAMYKRYRRCARCSYRTRRGYWTRWVKARYYCAA 36240  
 Bhutan-09024 RGYRGRYSRWGWKKKGTAGYSSCSAAMYKRYRRCARCSYRTRRGYWTRWVKARYYCAA 36240  
 Bhutan-09027 RGYRGRYSRWGWKKKRTAGYSSCSAAMYKRYRRCARCSYRTRRGYWTRWVKARYYCAA 36240  
 Bhutan-09030 RGYRGRYSRWGWKKKRTAGYSSCSAAMYKRYRRCARCSYRTRRGYWTRWVKARYYCAA 36240  
 Bhutan-09005 RRYTRRACCGTSWWKTRYSRCCMGWMTATTAYGGTCCGCAACYWCRWVKGRYYMGG 36240  
 Indonesia-88035 RRYTRRACCGTSWWKTRYSRCCMGWMTATTAYGGTCCGCAACYWCRWVKGRYYMGG 36240  
 Indonesia-88045 RRYTRRACCGTSWWKTRYSRCCMGWMTATTAYGGTCCGCAACYWCRWVKGRYYMGG 36240  
 Indonesia-88065 RRYTRRACCGTSWWKTRYSRCCMGWMTATTAYGGTCCGCAACYWCRWVKGRYYMGG 36240

\* \* \* . . \*\*\*\* . . . . \* . . . \*\* \*\*\*\* . \*\* ..

Bhutan-09015 TAWCMTGCCCTWWGTAGWRAAMYRRMAGAYACWYWTACGRAMMRGCMYKRAAGCKYWCRS 36300  
 Bhutan-09024 TAWCMWGCCTWWGTAGWRAAMYRRMAGAYACWYWTACGRAMMRGCMYKRAAGCKYWCRS 36300

Bhutan-09027 TAWCMWGCCCTWWGTAGWRAAMYRRMAGAYACWYWTGAGRAMMRGCMYKRAAGCKYWCRS 36300

Bhutan-09030 TAWCMWGCCCTWWGTAGWRAAMYRRMAGAYACWYWTGAGRAMAGGCMYKRAAGCKYWCRS 36300

Bhutan-09005 YMWMTTAYMYATAARSAARRACARCWKGTGTATACYSRRAAGATMYKAGGTTTTWYRC 36300

Indonesia-88035 YMWMTTAYMYATAARSAARRACARCWKGTGTATACYSRRAAGATMYKAGGTTTTWYRC 36300

Indonesia-88045 YMWMTTAYMYATAARSAARRACARCWKGTGTATACYSRRAAGATMYKAGGTTTTWYRC 36300

Indonesia-88065 YMWMTTAYMYATAARSAARRACARCWKGTGTATACYSRRAAGATMYKAGGTTTTWYRC 36300

\* \* . .: . \* . . . \* . \*\*\* . . \* \* .

Bhutan-09015 WYTGTKKGGRCTYRYWRYYYCYAMYYWYMYGRRYTGYTTGTTKCKYATAYWMGRMGC 36360

Bhutan-09024 WYTGTKKGGRCTYRYWRYYYCYAMYYWYMYGRRYTGYTTGTTKCKYATAYWMGRMGC 36360

Bhutan-09027 WYTGTKKGGRCTYRYWRYYYCYAMYYWYMYGRRYTGYTTGTTKCKYATAYWMGRMGC 36360

Bhutan-09030 WYTGTKKGGRCTYRYWRYYYCYAMYYWYMYGRRYTGYTTGTTKCKYATAYWMGRMGC 36360

Bhutan-09005 WYWAGKRRRYYRCTWRYCCSYCGCTTWTCTTTKRRYWATKYRYGKYRYMCAARMAY 36360

Indonesia-88035 WYWAGKRRRYYRCTWRYCCSYCGCTTWTCTTTKRRYWATKYRYGKYRYMCAARMAY 36360

Indonesia-88045 WYWAGKRRRYYRCTWRYCCSYCGCTTWTCTTTKRRYWATKYRYGKYRYMCAARMAY 36360

Indonesia-88065 WYWAGKRRRYYRCTWRYCCSYCGCTTWTCTTTKRRYWATKYRYGKYRYMCAARMAY 36360

\*\* . \*\* \* \*\* \*\*\* . \* . \* \*\*\* . . \* \* .\*\*.

Bhutan-09015 YCRGRCAKGCWRRGCTRRSTCRRATSCKRRGAAGCWAARCMCYRRCCTGTSMWRRYYYYR 36420

Bhutan-09024 YCRGRCAKRCARRGCTRRSTCRRATSCKRRGAAGCWAARCMCYRRCCTGTSMWRRYYYYR 36420

Bhutan-09027 YCRGRCAKRCWRRGCTRRSTCRRATSCKRRGAAGCWAARCMCYRRCCTGTSMWRRYYYYR 36420

Bhutan-09030 YCRGRCAKRCRRGCTRRSTCRRATSCKRRGAAGCWAARCMCYRRCCTGTSMWRRYYYYR 36420

Bhutan-09005 TCASAGRGASTRAKYRRCYGGRRKGGTRRTCWATATGGYATYGRTYWKYSCAARYTYR 36420

Indonesia-88035 TYASAGRGASTRAKYRRCYGGRRKGGTRRTCWATATGGCATYGRTYWKYSCAARYTYR 36420

Indonesia-88045 TYASAGRGASTRAKYRRCYGGRRKGGTRRTCWATATGGCATYGRTYWKYSCAARYTYR 36420

Indonesia-88065 TCASAGRGASTRAKYRRCYGGRRKGGTRRTCWATATGGCATYGRTYWKYSCAARYTYR 36420

. \* \*\* . . \*\* . . :. \* \* \* \*\* \*\*\*

Bhutan-09015 RGYGGRYMSYAMRAKAAGARSGCAYMYRKRGRWCMGMRGGRGCCYCKCMCGRTYRG 36480

Bhutan-09024 RGYGGRYMSYAMRAKAAGARSGCAYMYRKRGRWCMGMRGGRGCCYCKCMCGRTYRG 36480

Bhutan-09027 RGYGGRYMSYAMRAKAAGARSGCAYMYRKRGRWCMGMRGGRGCCYCKCMCGRTYRG 36480

Bhutan-09030 RGYGGRYMSYAMRAKAAGARSGCAYMYRKRGRWCMGMRGGRGCCYCKCMCGRTYRG 36480

Bhutan-09005 GSCRRGCMCCTMGRGRRRRSAYRWCTCTGTAGRAAYRMSGRRRKYTYTMMAGRWCAS 36480

Indonesia-88035 GSCRRGCMCCTMGRGRRRRSAYRWCTCTGTAGRAAYRMSGRRRKYTYTMMAGRWCAS 36480

Indonesia-88045 GSCRRGCMCCTMGRGRRRRSAYRWCTCTGTAGRAAYRMSGRRRKYTYTMMAGRWCAS 36480

Indonesia-88065 GSCRRGCMCCTMGRGRRRRSAYRWCTCTGTAGRAAYRMSGRRRKYTYTMMAGRWCAS 36480

. \* . : \* . \*\* . . \* . \* \* . \* .

Bhutan-09015 CGGMYKRTTGRRGTYATGTCWRRRRKTGRSRRYGAYRRMRKAAGRKYKWTMRCCGYT 36540

Bhutan-09024 CGGMYKRTTGRRGTYATGTCWRRRRKTGRSRRYGAYRRMRKAAGRKYKWTMRCCGYT 36540

Bhutan-09027 CGGMYKRTTGRRGTYATGTCWRRRRKTGRSRRYGAYRRMRKAAGRKYKWTMRCCGYT 36540

Bhutan-09030 CGGMYKRTTGRRGTYATGTCWRRRRKTGRSRRYGAYRRMRKAAGRKYKWTMRCCGYT 36540

Bhutan-09005 SGGATCKGYTTGRTYCRYRYWGRRRKRRAGARYRWYARMGTGRARGYKAYCASTKTY 36540

Indonesia-88035 SRRATCKGYWKRTYCRYRYWGRRRKRRAGARYRWYARMGTGAARGYKAYCASTKTY 36540

Indonesia-88045 SRRATCKGYWKRTYCRYRYWGRRRKRRAGARYRWYARMGTGAARGYKAYCASTKTY 36540

Indonesia-88065 SRRATCKGYWKRTYCRYRYWGRRRKRRAGARYRWYARMGTGAARGYKAYCASTKTY 36540

. \* \* \*\*\*\*\* . \*\* \*\* \* .. \* \*\* . \*

Bhutan-09015 ARRGTMRYYACWCCTRYRYRYGGAARYRRSGYCKMSRWYTYSTYCMYSYRRCRASYY 36600

Bhutan-09024 ARRGTMRYYACWCCTRYRYRYGGAARYRRSGYCKMSRWYTYSTYCMYSYRRCRASYY 36600

Bhutan-09027 ARRGTMRYYACWCCTRYRYRYGGAARYRRSGYCKMSRWYTYSTYCMYSYRRCRASYY 36600

Bhutan-09030 ARRGTMRYYACWCCTRYRYRYGGAARYRRSGYCKMSRWYTYSTYCMYSYRRCRASYY 36600

Bhutan-09005 TRRCCTMRCYRTATAGATGYRYGGAAYRCCCYKCCGWCCYCYCYSYGRGRRYY 36600

Indonesia-88035 TRRCCTMRCYRTATAGATRYRYKRRWAYRRCYCYKCCGWCCYCYCYSYGRGRRYY 36600

Indonesia-88045 TRRCCTMRCYRTATAGATRYRYKRRWAYRRCSCYCYKCCGWCCYCYCYSYGRGTGRRGY 36600  
Indonesia-88065 TRRCCTMRCYRTATAGATGYRYKRRWAYRRCSCCYKCCGWCCYCYCYSYGRGTGRRGY 36600  
: \*\* \* \* \* . \* \* \* \* \* \* . \* . \* \* \* \* \* . \*\*

Bhutan-09015 YYTAGTTTSKRRRARGYRRGYTTRMYGMKRTAARYRRYRMRYGCRTWAAWSCRYTKWKTGR 36660  
Bhutan-09024 YYTAGTTTSKRRRARGYRRGYTTRMYGMKRTAARYRRYRMRYGCRTWAAWSCRYTKWKTGR 36660  
Bhutan-09027 YYTAGTTTSKRRRARGYRRGYTTRMYGMKRTAARYRGTGMRYGCRTWAAWSCRYTKWKTGR 36660  
Bhutan-09030 YYTAGTTTSKRRRARGYRRGYTTRMYGMKRTAARYRRYRMRYGCATWAAWSCRYTKWKTGR 36660  
Bhutan-09005 CCTKKGKYGAGARRCARKYKYGMTKMGRTAGGYGACACATKGGWARRTGMRCCTAKYRR 36660  
Indonesia-88035 CCTKKGKYGAGARRCARKYKYGMTKAGRYAGGYGACACATKGGWARRTGMRCCTAKYRR 36660  
Indonesia-88045 CCTKKGKYGAGARRCARKYKYGMTKMGRYRGGYGACACATKGGWARRTGMRCCTAKYRR 36660  
Indonesia-88065 CCTKKGKYGAGARRCARKYKYGMTKMGRYRGGYGACACATKGGWARRTGMRCCTAKYRR 36660  
. : . . \* \* \* . \* \* . \* . \* . \* . \* \*

Bhutan-09015 YYRRYCYCTGTMYGTYYYCRAWKRAKCRYYSYCRACMKYSYARTYRAAYTYMYGTTKW 36720  
Bhutan-09024 YYRRYCYCTGTMYGTYYYCRAWKRAKCRYYSYCRACMKYSYARTYRAAYTYMYGTTKW 36720  
Bhutan-09027 YYRRYCYCTGTMYGTYYYCRAWKRKCRYYSYCRACMKYSYARTYRAAYTYMYGTTKW 36720  
Bhutan-09030 YYRRYCYCTGTMYGTYYYCAAWKRAKCRYYSYCRACMKYSYARTYRAAYTYMYGTTKW 36720  
Bhutan-09005 YTRATYCCYRCMCAYYYCYRRATRAGMRYCYGYTARAAYSTWRWYRGRYGYCYKYGYGA 36720  
Indonesia-88035 YTRATYCCYRCMCAYYYCYRRATRAGMRYCYGYTARAAYSTWRWYRGRYGYCYKYGYGA 36720  
Indonesia-88045 YTRATYCCYRCMCAYYYCYRRATRAGMRYCYGYTARAAYSTWRWYRGRYGYCYKYGYGA 36720  
Indonesia-88065 YTRATYCYRCMCAYYYCYRRATRAGMRYCYGYTARAAYSTWRWYRGRYGYCYKYGYGA 36720  
\* \* \* \* \* . \* \* \* . \* \* \* \* \* . \* \* \* \* \* . \* \* \* \* \*

Bhutan-09015 GKYATATRMYYYYSRRGCRGARYMRAYWMRCYCYWMRKGMWCCAAATRYCRCWGAGRWYY 36780  
Bhutan-09024 GKYAYATRMYYYYSRRGCRGARYMRAYWMRCYCYWMRKGMWCCAAATRYCRCWGAGRWYY 36780  
Bhutan-09027 GKYATATRMYYYYSRRGCRGARYMRAYWMRCYCYWMRKGMWCCAAATRYCRCWGAGRWYY 36780  
Bhutan-09030 GKYATATRMYYYYSRRGCRGARYMRAYWMRCYCYWMRKGMWCCAAATRYCRCWGAGRWYY 36780  
Bhutan-09005 ATYMCGCGCCCTTSARRYRAGACARWCWMAMTCTCRKCCATAAWRRYATYRYWCRRGWTY 36780  
Indonesia-88035 RTYMCGCGCCCTTSARRYRAGACARWCWMAMTCTCRKCCATAAWRRYATYRYWCRRGWTY 36780  
Indonesia-88045 RTYMCGCGCCCTTSARRYRAGACARWCWMAMTCTCRKCCATAAWRRYATYRYWCRRGWTY 36780  
Indonesia-88065 RTYMCGCGCCCTTSARRYRAGACARWCWMAMTCTCRKCCATAAWRRYATYRYWCRRGWTY 36780  
. \* . \* \* \* \* . \* \* \* \* \* . \* \* \* \* \* . \* \* \* \* \*

Bhutan-09015 SYAMMWGKSCWYAARWMRKRRMYMYRYAARYWRRS SKTSGMCCGSTYYRSGRYYAYMGT 36840  
Bhutan-09024 SYAMMWGKSCWYAARWMRKRRMYMYRYAARYWRRS SKTSGMCCGSTYYRSGRYYAYMGT 36840  
Bhutan-09027 SYAMMWGKGCATAARWMRKRRMYMYRYAARYWRRS SKTSGMCCGSTYYRSGRYYAYMGT 36840  
Bhutan-09030 SYAMMWGKSCWYAARWMRKRRMYMYRYAARYWRRS SKTSGMCCGSTYYRSGRYYAYMGT 36840  
Bhutan-09005 CCRAAAKKS YKCGCAWMRGRMCMYRCRMCWRAGCGCRCTYACGCYASKACCTRCCKY 36840  
Indonesia-88035 CCRAAAKKS YKCGCAWMRGRMCMYRCRMCWRAGCGCRCTYACGCYASKACCTRCCKY 36840  
Indonesia-88045 CCRAAAKKS YKCGCAWMRGRMCMYRCRMCWRAGCGCRCTYACGCYASKACCTRCCKY 36840  
Indonesia-88065 CCRAAAKKS YKCGCAWMRGRMCMYRCRMCWRAGCGCRCTYACGCYASKACCTRCCKY 36840  
. \* . \* \* \* \* \* \* \* \* \* \* \* \* \* \* \*

Bhutan-09015 YRRRCTYKRYSCRGMGRMTGACCGCTGRSRGAYRTRYTGRRAGWRWRGTYRSYRMYYA 36900  
Bhutan-09024 YRRRCTYKRYSCRGMGRMTGACCGCTGRSRKWYRTRYTGRRAGWRWRGTYRSYRMCAA 36900  
Bhutan-09027 YRRRCTYKRYSCRGMGRMTGACCGCTGRSRGAYRTRYTGRRAGWRWRGTYRSYRMCAA 36900  
Bhutan-09030 YRRRCTYKRYSCRGMGRMTGACCGCTGRSRGAYRTRYTGRRAGWRWRGTYRSYRMCAA 36900  
Bhutan-09005 CAARYYTGRYSYATCKGGAYRWYKMAAGGAGAYGARYRAGRRARWASWYASYACCAW 36900  
Indonesia-88035 CAARYYTGRYSYATCKGGAYRWYKMAAGGAGAYGARYRAGRRARWASWYASYACCAA 36900  
Indonesia-88045 CAARYYTGRYSYATCKGGAYRWYKMAAGGAGAYGARYRAGRRARWASWYASYACCAW 36900  
Indonesia-88065 CAARYYTGRYSYATCKGGAYRWYKMAAGGAGAYGARYRAGRRARWASWYASYACCAW 36900  
\* \* \* \* \* : . . \* : \* \* \* \* \* . \* \* \*

Bhutan-09015 AWCYRTKYGAKMRTAYYYTYRRRCRGTCCKKACAGARYCCYYMSKYTACATYRYMGGARC 36960  
 Bhutan-09024 AWCYRKKYGAKMRTAYYYTYRRRCRGTCCKKACAGARYCCYYMSKYTACATYRYMGGARC 36960  
 Bhutan-09027 AWCYRTKYGAKMRTAYYYTYRRRCRGTCCKKACAGARYCCYYMSKYTACATYRYMGGARC 36960  
 Bhutan-09030 AWCYRTKYGAKMRTAYYYTYRRRCRGTCCKKACAGARYCCYYMSKYTACATYRYMGGARC 36960  
 Bhutan-09005 GWMTATKYSRWYRKWYTCYYYAASGACTTRGYRYARATSYYTCSKCYMYTWCAYCCKCAM 36960  
 Indonesia-88035 RWMATAKYSRWYRKWYTCYYYAASGACTTRGYRYARATSYYTCSKCYMYAACAACCTCRM 36960  
 Indonesia-88045 RWMATAKYSRWYRKWYTCYYYAASGACTTRGYRYARATSYYTCSKCYMYTACAYCCTCRM 36960  
 Indonesia-88065 RWMATAKYSRWYRKWYTCYYYAASGACTTRGYRYARATSYYTCSKCYMYAWCAYCCTCRM 36960

\* .\*\* . \* . \* \*\* . . \* . . \* \*\* : \* .

Bhutan-09015 GACMGYTGWYKSMGRWAAKKRYGWRGGRYCYSSSSGYTGCTTCGAGSWYSRMAGMATTY 37020  
 Bhutan-09024 GACMGYTGWYKSMGRWAATGYRGRYCYSSSSGYTGCTTCGAGSWYSRMAGMATTY 37020  
 Bhutan-09027 GACMGYTGWYKSMGRWAAKKRYGWRGGRYCYSSSSGYTGCTTCGAGSWYSRMAGMATTY 37020  
 Bhutan-09030 GACMGYTGWYKSMGRWAAKKRYGWRGGRYCYSSSSGYTGCTTCGAGSWYSRMAGMATTY 37020  
 Bhutan-09005 KRSMSTYSTTKSARGWRGGTTRCWCAAYMCCYSSRYMYKYTYYSRAGWTSRATRAMYCC 37020  
 Indonesia-88035 KRSMSTYSTTKSARGWRGGTTRCWCAAYMCCYSSRYMYKYTYYSRAGWTSRATRAMYCC 37020  
 Indonesia-88045 KRSMSTYSTTKSARGWRGGTTRCWCAAYMCCYSSRYMYKYTYYSRAGWTSRATRAMYCC 37020  
 Indonesia-88065 KRSMSTYSTTKSARGWRGGTTRCWCAAYMCCYSSRYMYKYTYYSRAGWTSRATRAMYCC 37020

. \* . . \*\* \* . \* \* . \* .\*\*.. \* . . . \* \*\* :

Bhutan-09015 YYARATRMKMMWWTYRGSYYTSCWATKGYRTMRWYRRTTRARTTWTRRRSRMYYYYKYRY 37080  
 Bhutan-09024 YYARATRMKMMWWTYRGSYYTSCWATKGYRTMRWYRRTTRARTTWTRRRSRMYYYYKYRY 37080  
 Bhutan-09027 YYARATRMKMMWWTYRGSYYTSCWATKGYRTMRWYRRTTRARTTWTRRRSRMYYYYKYRY 37080  
 Bhutan-09030 YYARATRMKMMWWTYRGSYYTSCWATKGYRTMRWYRRTTRARTTWTRRRSRMYYYYKYRY 37080  
 Bhutan-09005 CTGGCGGCTAMATKCGTGTGCGGTCGKTRKMGWGCAGCAMAYATYAARGGCCCTGCGC 37080  
 Indonesia-88035 CTGGCGGCTAMATKCGTGTGCGGTCGKTRKMGWGCAGCAMAYATYAARGGCCCTGCGC 37080  
 Indonesia-88045 CTGGCGGCTAMATKCGTGTGCGGTCGKTRKMGWGCAGCAMAYATYAARGGCCCTGCGC 37080  
 Indonesia-88065 CTGGCGGCTAMATKCGTGTGCGGTCGKTRKMGWGCAGCAMAYATYAARGGCCCTGCGC 37080

. . . \* . . . . \* . \* \* : \* .

Bhutan-09015 SACRGRYYTCTSRYACYCYACTCTTWCAYKMRYYKKGCTRACYRRKYRYWCKGSYTKK 37140  
 Bhutan-09024 SACRGRYYTCTSRYACYCYACTCTTWCAYKMRYYKKGCTRACYRAGYRYWCKGSYTKK 37140  
 Bhutan-09027 SACRGRYYTCTSRYACYCYACTCTTWCAYKMRYYKKGCTRACYRAGYRYWCKGSYTKK 37140  
 Bhutan-09030 SACRGRYYTCTSRYACYCYACTCTTWCAYKMRYYKKGCTRACCRAGYRYWCKGSYTKK 37140  
 Bhutan-09005 GRYRTGCTYMWSGTMSCYYYMYYYWYTYWYTKMRTYKKGCGYGRYYGGKTACTYKTGKGG 37140  
 Indonesia-88035 GACRTGCTTCTGGTACCTCTACTCYTTTCATTTMRTYKRYGACYGGTTACTCKTGTTGG 37140  
 Indonesia-88045 GACRTGCTTCTGGTACCTCTACTCYTTTCATTTMRTYKRYGACYGGTTACTCKTGTTGG 37140  
 Indonesia-88065 GRYRTGCTYMWSGTMSCYYYMYYYWYTYWYTKMRTYKKGCGYGRYYGGKTACTYKTGKGG 37140

. \* . . . . \*\* \*\*\* \* . .

Bhutan-09015 CKKKKWCRARGRYGWYKKAAYAACGYAMYGWYRYYYAYRKSCRMYKTCGCTGMCRAC 37200  
 Bhutan-09024 CKKKKWCRARRRYGWYKKAAYAAAGYAMYGWYRYYYAYRKSCRMYKTCGCTGMCRAC 37200  
 Bhutan-09027 CKKKKWCRARGRYGWYKKAAYAAAGYAMYGWYRYYYAYRKSCRMYKTCGCTGMCRAC 37200  
 Bhutan-09030 CKKKKWCRARGRYGWYKKAAYAAAGYAMYGWYRYYYAYRKSCRMYKTCGCTGCRAC 37200  
 Bhutan-09005 TGGTGTSSRRGRYRWRWCKTWGMYMRYKYRAYRWYATTCACRGSYGAYGCMRYYYRCRM 37200  
 Indonesia-88035 TGGTGTSSRRGGYRWRWCKTWGMYMRYKYRAYRWYATTCACRGSYGAYGCMRYYYRCRM 37200  
 Indonesia-88045 TGGTGTSSRRGRYRWRWCKTWGMYMRYKYRAYRWYATTCACRGSYGAYGCMRYYYRCRM 37200  
 Indonesia-88065 TGGTGTSSRRGRYRWRWCKTWGMYMRYKYRAYRWYATTCACRGSYGAYGCMRYYYRCRM 37200

. \* \*\* \* \* . \* \* \* \* \* \* \* \* \* \*

Bhutan-09015 YGRGRRTYYTKRYAYWYGCMTMTWCAMTWGWRMYWMTYYCGTKTRRYTMSMTCCYGSRG 37260  
 Bhutan-09024 YGRGRRTYYTKRYAYWYGCMTMTWCAMTWGWRMYWMTYYCGTKTRRYTMSMTCCYGSRG 37260  
 Bhutan-09027 YGRGRRTYYTKRYAYWYGCMTMTWCAMTWGWRMYWMTYYCGTKTRRYTMSMTCCYGSRG 37260  
 Bhutan-09030 YGRGRRTYYTKRYAYWYGCMTMTWCAMTWGWRMYWMTYYCGTKTRRYTMSMTCCYGSRG 37260



|                 |                                                              |       |
|-----------------|--------------------------------------------------------------|-------|
| Bhutan-09005    | YRGRRGYCTATGCWYWCRTMYCYWYMCCWRARMCWAATCMRCKYRGCCMKCYYYTRGGKS | 37260 |
| Indonesia-88035 | YRGRRGYCTATGCWYWCRTMYCYWYMCCWRARMCWAATCMRCKYRGCCMKCYYYTRGGKS | 37260 |
| Indonesia-88045 | YRGRRGYCTATGCWYWCRTMYCYWYMCCWRARMCWAATCMRCTCGGCCMKCYYYTRGGKS | 37260 |
| Indonesia-88065 | YRGRRGYCTATGCWYWCRTMYCYWYMCCWRARMCWAATCMRCTCGGCCMKCYYYTRGGKS | 37260 |
|                 | * * :. ** * * * ** * : . * . . .                             |       |
| Bhutan-09015    | CMATARRRATRMWWWMSRGAGMCRWSRGGCTRAYATAYCRTYYYWGYYWRATWTRCKTWK | 37320 |
| Bhutan-09024    | CMATARRRATRMWWWMSRGAGMCRWSRGGCTRAYATAYCRTYYYWGYYWRATWTRCKTWK | 37320 |
| Bhutan-09027    | CMATARRRATRMWWWMSRGAGMCRWSRGGCTRAYATAYCRTYYYWGYYWRATWTRCKTWK | 37320 |
| Bhutan-09030    | CMATARRRATRMWWWMSRGAGMCRWSRGGCTRAYATAYCRTYYYWGYYWRATWTRCKTWK | 37320 |
| Bhutan-09005    | YCRCRGRWCACWWWGGRARRTAAGGARMARRRCRRTTGICYTWSYACTAGTWYRYKWWT  | 37320 |
| Indonesia-88035 | YCRCAAGRWCACWWWGGRAGRTAAGGARMARRRCRRTTGICYTWSYACTAGTWYRYKWWT | 37320 |
| Indonesia-88045 | YCRCRGRWCACWWWGGRARRTAAGGARMARRRCRRTTGICYTWSYACTAGTWYRYKWWT  | 37320 |
| Indonesia-88065 | YCRCRGRWCACWWWGGRARRTAAGGARMARRRCRRTTGICYTWSYACTAGTWYRYKWWT  | 37320 |
|                 | * ** . . . : * * * . * * *                                   |       |
| Bhutan-09015    | YRKMICYSRSTTKGRTRYSRYCTRKYWRWRWCRWTSATGGMMAACYTCKWWSRYAARRCA | 37380 |
| Bhutan-09024    | YRKMICYSRSTTKGRTRYSRYCTRKYWRWRWCRWTSATGGMMAACYTCKWWSRYAARRCA | 37380 |
| Bhutan-09027    | YRKMICYSRSTTKGRTRYSRYCTRKYWRWRWCRWTSATGGMMAACYTCKWWSRYAARRCA | 37380 |
| Bhutan-09030    | YRKMICYSRSTTKGRTRYSRYCTRKYWRWRWCRWTSATGGMMAACYTCKWWSRYAARRCA | 37380 |
| Bhutan-09005    | CRKMTSCCRSAAATYGVWACCCTCGGYTGRWYGTASRCGAMMRYTWMGTWRGYWRRRYM  | 37380 |
| Indonesia-88035 | CRKMTSCCRSAAWKSGWAYSACTCGGYTGRWYGTWCRRCAMMRYTWMGTWRSYWARRYM  | 37380 |
| Indonesia-88045 | CRKMTSCCRSAAWKSGWAYSACTCGGYTGRWYGTWCRRCAMMRYTWMGTWRSYWARRYM  | 37380 |
| Indonesia-88065 | CRTATSCCRSAAATYGVWACCCTCGGYTGRWYGTASRCGAMMRYTWMGTWRGYWRRRYM  | 37380 |
|                 | * . . ** : . . * ** . * ** * *                               |       |
| Bhutan-09015    | CTGRSGCYGWSYYAKTTGGTSYSYKRRYKMYAKRWTYTWWRKTWGRGSRYYRMRACGK   | 37440 |
| Bhutan-09024    | CTGRSGCYGWSYYAKTTGGTSYSYKRRYKMYAKRWTYTWWRKTWGRGSRYYRMRACGK   | 37440 |
| Bhutan-09027    | CTGRSGCYGWSYYAKTTGGTSYSYKRRYKMYAKRWTYTWWRKTWGRGSRYYRMRACGK   | 37440 |
| Bhutan-09030    | CTGRSGCYGWSYYAKTTGGTSYSYKRRYKMYAKRWTYTWWRKTWGRGSRYYRMRACGK   | 37440 |
| Bhutan-09005    | MYSRSRMYKTSTTATGCRSYGCCCTAAGCGMTRSGTKTKAARTCWSRSGRCGRTAAWYKG | 37440 |
| Indonesia-88035 | MYSRSGMYKTSTTRTGCRSYGCCCTAAGCGMTRSGTKTKAARTCWSRSGRCGRTAAWYKG | 37440 |
| Indonesia-88045 | MYSRSGMYKTSTTRTGCRSYGCCCTAAGCGMTRSGTKTKAARTCWSRSGRCGRTAAWYKG | 37440 |
| Indonesia-88065 | MYSRSRMYKTSTTATGCRSYGCCCTAAGCGMTRSGTKTKAARTCWSRSGRCGRTAAWYKG | 37440 |
|                 | . ** * * . . . . * . . . * . * . * * *                       |       |
| Bhutan-09015    | GGGAAYSSRRMCRSYAYRTCGRKWRRRMAACWYICARRRAMWYWRRYGRAAYRRWRGTY  | 37500 |
| Bhutan-09024    | GGGAAYSSRRMCRSYAYRTCGRKWRRRMAACWYICARRRAMWYWRRYGRAAYRRWRGTY  | 37500 |
| Bhutan-09027    | GGGAAYSSRRMCRSYAYRTCGRKWRRRMAACWYICARRRAMWYWRRYGRAAYRRWRGTY  | 37500 |
| Bhutan-09030    | GGGAAYSSRRACRSYAYRTCGRKWRRRMAACWYICARRRAMWYWRRYGRAAYRRWRGTY  | 37500 |
| Bhutan-09005    | RATRGCSCAACAASTRCGAGSGTWRRACRWYCCYRGGRMCAAYTRATRGGGCAGAGRKTC | 37500 |
| Indonesia-88035 | RATRGCSCAACAASTRCGAGSGTWRRACRWYCCYRGGRMCAAYTRATRGGGCAGAGRKTC | 37500 |
| Indonesia-88045 | RATRGCSCAACAASTRCGAGSGTWRRACRWYCCYRGGRMCAAYTRATRGGGCAGAGRKTC | 37500 |
| Indonesia-88065 | RATRGCSCAACAASTRCGAGSGTWRRACRWYCCYRGGRMCAAYTRATRGGGCAGAGRKTC | 37500 |
|                 | . . * . * : . . ** * * * * . .                               |       |
| Bhutan-09015    | TYWRGWSYRYAAKMYARTARYWYSYSCYSAKSRCSYTAWTCSSSMYAMRYATKRAYRGWT | 37560 |
| Bhutan-09024    | TYWRGWSYRYAAKMYARTARYWYSYSCYSAKSRCSYTAWTCSSSMYAMRYATKRAYRGTT | 37560 |
| Bhutan-09027    | TYWRGWSYRYAAKMYARTARYWYSYSCYSAKSRCSYTAWTCSSSMYAMRYATKRAYRGWT | 37560 |
| Bhutan-09030    | TYWRGWSYRYAAKMYARTARYWYSYSCYSAKSRCSYTAWTCSSSMYAMRYATKRAYRGWT | 37560 |
| Bhutan-09005    | KCTGSASTATRMGMTMAYMGYWCYCMTSWTGCGYCTYRAYYCSSMTRCWTGTRCGGTY   | 37560 |
| Indonesia-88035 | KCTGGWSTATRMGMTMAYMGYWCYCMTSWTGCGYCTYRAYYCSSMTRCWTGTRCGGTY   | 37560 |
| Indonesia-88045 | KCTGGWSTATRMGMTMAYMGYWCYCMTSWTGCGYCTYRAYYCSSMTRCWTGTRCGGTY   | 37560 |
| Indonesia-88065 | KCTGSASTATRMGMTMAYMGYWCYCMTSWTGCGYCTYRAYYCSSMTRCWTGTRCGGTY   | 37560 |



|                 |                                                                |       |
|-----------------|----------------------------------------------------------------|-------|
| Bhutan-09027    | GTRAGAKKGGGYAYMGAYKGWYGGATRWRYYRRRTAYYACWGTKAMYTWKYYRYYYTGAA   | 37920 |
| Bhutan-09030    | GTRAGAKKGGGYAYMGAYKGWYGGATRWRYYRRRTAYYACWGTKAMYTWKYYRYYYTGAA   | 37920 |
| Bhutan-09005    | RWARKRTTKRRCGTCKMTKKWCKAGTAAATGRGRAMCYCGARWGWCCYWTGTYRCCCTCCGM | 37920 |
| Indonesia-88035 | RWARKRTTKRRCGYMGMTKKWCKAGWRATGRGRAMCYCGARWGWCCYWTGTYRCCCTCCGM  | 37920 |
| Indonesia-88045 | RWARKRTTKRRCGYMGMTKKWCKAGWRATGRGRAMCYCGAGWGWCCYWTGTYRCCCTCCGM  | 37920 |
| Indonesia-88065 | RWARKRTTKRRCGTCKMTKKWCKAGTAAATGRGRAMCYCGARWGWCCYWTGTYRCCCTCCGM | 37920 |
|                 | .. . * * .. * : * . * ** .                                     |       |
| Bhutan-09015    | ATTYMRYSCTCRCKCYAGAATYKYAGTYYYAACARWYMWMKRKTCMKCYKWWRYAATCC    | 37980 |
| Bhutan-09024    | ATTYMRYSCTCRCKCYAGAATYKYAGTYYYAACARWYMWMKRKTCMKCYKWWRYAATCC    | 37980 |
| Bhutan-09027    | ATTYMRYSCTCRCKCYAGAATYKYAGTYYYAACARWYMWMKRKTCMKCYKWWRYAATCC    | 37980 |
| Bhutan-09030    | ATTYMRCCCTCRCKCYAGAATYKYAGTYYYAACARWYMWMKRRTTCMKCYKWWRYAATCC   | 37980 |
| Bhutan-09005    | WWKTARCCTYMRATYYRRRWKCGCGTKCYCRWYMAWYATKCRTYMGMKYTTGCCRRWYY    | 37980 |
| Indonesia-88035 | WWKTARCCTYMRATYYRRRWKCGCGTKCYCRWYMAWYATKCRTYMGMKYTTGCCRRWYY    | 37980 |
| Indonesia-88045 | WWKTARCCTYMRATYYRRRWKCGCGTKCYCRWYMAWYATKCRTYMGMKYTTGCCRRWYY    | 37980 |
| Indonesia-88065 | WWKTARCCTYMRATYYRRRWKCGCGTKCYCRWYMAWYATKCRTYMGMKYTTGCCRRWYY    | 37980 |
|                 | . * . *.. * . . * ** * * . * **                                |       |
| Bhutan-09015    | CRRCSYRGTGYTAARGGRTGKRCYWAYAYRRRMTWARWMCACYCKYYGMMRYRRGYATGT   | 38040 |
| Bhutan-09024    | CRRSYRGTGYTAARGGRTGKRCYWAYAYRRRMTWARWMCACYCKYYGMMRYRRGYATGT    | 38040 |
| Bhutan-09027    | CRRSYRGTGYTAARGGRTGKRCYWAYAYRRRMTWAAWMCACYCKYYGMMRYRRGYATGT    | 38040 |
| Bhutan-09030    | CRRSYRGTGYTAARGGRTGKRCYWAYAYRRRMTWARWMCACYCKYYGMMRYRRGYATGT    | 38040 |
| Bhutan-09005    | YRACYCARYKYMRRTGRYRKRSCAWTRTRGRGCKAAAWMSCTTSGCTKCMGTGARCGWAK   | 38040 |
| Indonesia-88035 | YRACYCARYKYMRRTSRYRKRSCAWTRTRGRGCKARAWMSCTTSGCTKCMGTGARCGWAK   | 38040 |
| Indonesia-88045 | YRACYCARYKYMRRTGRYRKRSCAWTRTRGRGCGARAWMSCTTSGCTKCMGTGARCGWAK   | 38040 |
| Indonesia-88065 | YRACYCARYKYMRRTGRYRKRSCAWTRTRGRGCKARAWMSCTTSGCTKCMGTGARCGWAK   | 38040 |
|                 | * . * . * * * . * ** * * . * . . .                             |       |
| Bhutan-09015    | MMGGRYYGGMTTTGYGWWGTYAYSSGRWCYRKYKTRWYRGAAYRTWRYGCAWYTRR       | 38100 |
| Bhutan-09024    | MMGGRYYGGMTTTGYGWWGTYAYSSGRWCYRKYKTRWYRGAAYRTWRYGCAWYTRR       | 38100 |
| Bhutan-09027    | MMGGRYYGGMTTTGYGWWGTYAYSSGRWCYRKYKTRWYRGAAYRTWRYGCAWYTRR       | 38100 |
| Bhutan-09030    | MMGGRYYGGMTTTGYGWWGTYAYSSGRWCYRKYKTRWYRGAAYRTWRYGCAWYTRR       | 38100 |
| Bhutan-09005    | AMARACTKKCCCWATRWAYKYYCRTSSRATYGGCTGWMRTTTTGRKTCCAYAGTRMRTCYGR | 38100 |
| Indonesia-88035 | AMARACTKKCCCWATRWAYKYYCRTSSRATYGGCTGWMRTTTTGRKTCCAYAGTRMRTCYGR | 38100 |
| Indonesia-88045 | AMARACTKKCCCWATRWAYKYYCRTSSRATYGGCTGWMRTTTTGRKTCCAYAGTRMRTCYGR | 38100 |
| Indonesia-88065 | AMARACTKKCCCWATRWAYKYYCRTSSRATYGGCTGWMRTTTTGRKTCCAYAGTRMRTCYGR | 38100 |
|                 | * . . * . * ** * * * : . *                                     |       |
| Bhutan-09015    | AGAARTCGRRSKYYRACYCRACYCRWRRWACACTMYTRKRRYCTAKSSRCSYRYM        | 38160 |
| Bhutan-09024    | AGAARTCGRRSKYYRACYCRACYCRWRRWACACTMYTRKRRYCTAKSSRCSYRYM        | 38160 |
| Bhutan-09027    | AGAARTCGRRSKCCYRACYCRACYCRWRRWACACTMYTRKRRYCTAKSSRCSYRYM       | 38160 |
| Bhutan-09030    | AGAARTCGRRSKCCYRACYCRACYCRWRRWACACTMYTRKRRYCTAKSSRCSYRYM       | 38160 |
| Bhutan-09005    | RRRAYMRGGGTTTCGGYCYRGAATYRWRRTMCACRYAYYWRKGGTMMYMGGSYRYGTM     | 38160 |
| Indonesia-88035 | RRRAYMRGGGTTTCGGYCYRGAATYRWRRTMSMYRYAYYWRKGGYMMYMGGSYRYGTM     | 38160 |
| Indonesia-88045 | RRRAYMRGGGTTTCGGYCYRGAATYRWRRTMSMYRYAYYWRKGGYMMYMGGSYRYGTM     | 38160 |
| Indonesia-88065 | RRRAYMRGGGTTTCGGYCYRGAATYRWRRTCGTRYAYYWRKGGTMMYMGGSYRYGTM      | 38160 |
|                 | . . * . **** * * ** . * * *                                    |       |
| Bhutan-09015    | RWYWWGRRAKRWGYTRRYSRYRGRYCRCCGTTAGSGGTRWTRRYTYRYSYARGRTRYRSS   | 38220 |
| Bhutan-09024    | RWYWWGRRAKRWGYTRRYSRYRGRYCRCCGTTAGSGGTRWTRRYTYRYSYARGRTRYRSS   | 38220 |
| Bhutan-09027    | RWYWWGRRAKRWGYTRRYSRYYRRCRCGTTAGSGGTRWTRRYTYRYSYARGRTRYRSS     | 38220 |
| Bhutan-09030    | RWYWWGRRAKRWGYTRRYSRYYRRCRCGTTAGSGGTRWTRRYTYRYSYARGRTRYRSS     | 38220 |
| Bhutan-09005    | ATYTTTRAMKRWRYGGYSGYARCTGYRRYWSSKTAAWWARYKTGYSTGARRAACGGG      | 38220 |
| Indonesia-88035 | ATYTTTRAMKRWRYGGYSGYAGCTGYRRYWSSKTAAWWAACTGYSTGARRAACGGG       | 38220 |

Indonesia-88045 ATYTTRRAMKGWRYGGYSGYAGCRTGYRRYWSKTAAWWARYKTGYSTGARRAACGGG 38220  
Indonesia-88065 ATYTTRRAMKGWRYGGYSGYAGCRTGYRRYWSKTAAWWARYKTGYSTGARRAACGGG 38220  
\* \* \* \* \* \* \* \* \* \* . \* : \* . \*\* . \* : ..

Bhutan-09015 KYGACRRGTWARCTYTYCYKWWSYGYKKYTYRMCGATTSMRCKYCYAYMMWMMRYKMT 38280  
Bhutan-09024 KYGACRRGTWARCTYTYCYKWWSYGYKKYTYRMCGATTSMRCKYCYAYMMWMMRYKMT 38280  
Bhutan-09027 KYGACRRGTWARCTYTYCYKWWSYGYKKYTYRMCGATTSMRCKYCYAYMMWMMRYKMT 38280  
Bhutan-09030 KYGACRRGTWARCTYTYCYKWWSYGYKKYTYRMCGATTSMRCKYCYAYMMWMMRYKMT 38280  
Bhutan-09005 KTARYRRACAWGAYTKCYCTGATSCRCTGYWYTGMGKRWYCCGSTYSYWYCMWAMGCKCC 38280  
Indonesia-88035 KTARYRRACAWGAYTKCYCTGATSCRCTGYWYTGMGKRWYCCGSTYSYWYCMWAMGCKCC 38280  
Indonesia-88045 KTARYRRACAWGAYTKCYCTGATSCRCTGYWYTGMGKRWYCCGSTYSYWYCMWAMGCKCC 38280  
Indonesia-88065 KTARYRRACAWGAYTKCYCTGATSCRCTGYWYTGMGGWYCCGSTYSYWYCMWAMGCKCC 38280  
\* . \*\* . . \* . \* \* \* . . . \* \* \* \* \*

Bhutan-09015 GTAMYKAACYAGGMGRGYTYAWGYRMYTAACCWSYCCSYRRYTYSGAYGWARWWARACM 38340  
Bhutan-09024 GTAMYKAACYAGGMGRGYTYAWGYRMYTAACCWSYCCSYRRYTYSGAYGWARWWARACM 38340  
Bhutan-09027 GTAMYKAACYAGGMGRGYTYAWGYRMYTAACCWSYCCSYRRYTYGGAYGWARWWARACM 38340  
Bhutan-09030 GTAMYKAACYAGGMGRGYTYAWGYRMYTAACCWSYCCSYRRYTYGGAYGWARWWARACM 38340  
Bhutan-09005 CARAYKWRYTTRKAGASTYYGAKCCGCYWRAYTGYYYSRATYTCCTCRIMRAARRRTM 38340  
Indonesia-88035 CARAYKWRYTTRKAGASTYYGAKCCGCYWRAYTGYYYSRATYTCCTCRIMRAARRRTM 38340  
Indonesia-88045 CARAYKWRYTTRKAGASTYYGAKCCGCYWRAYTGYYYSRATYTCCTCRIMRAARRRTM 38340  
Indonesia-88065 CARAYKWRYTTRKAGASTYYGAKCCGCYWRAYTGYYYSRATYTCCTCRIMRAARRRTM 38340  
: \*\* . \* . \* . \* \* \* : \* \* \*

Bhutan-09015 RGYMRYACGYRTMMGTGMRSTCTRYATARTGRWRWTCGWAWYAGGCTGTGYCWCWAMKW 38400  
Bhutan-09024 RGYMRYACGYRTMMGTGMRSTCTRYATARTGRWRWTCGWAWYAGGCTGTGYCWCWAMKW 38400  
Bhutan-09027 RGYMRYACGYRTMMGTGMRSTCTRYATARTGRWRWTCGWAWYAGGCTGTGYCWCWAMKW 38400  
Bhutan-09030 RGYMRYACGYRTMMGTGMRSTCTRYATARTGRWRWTCGWAWYAGGCTGTGYCWCWAMKW 38400  
Bhutan-09005 AKTMGCRYSYGYMMSYMAAAS TMYACRWMRWAAWAYYSWWT CMRYYAYRCCMARMMKW 38400  
Indonesia-88035 AKTMGCRYSYGYMMSYMAAAS TMYACRWMRWAAWAYYSWWT CMRYYAYRCCMARMMKW 38400  
Indonesia-88045 AKTMGCRYSYGYMMSYMAAAS TMYACRWMRWAAWAYYSWWT CMRYYAYRCCMARMMKW 38400  
Indonesia-88065 AKTMGCRYSYGYMMSYMAAAS TMYACRWMRWRWAAYYSWWT CMRYYAYRCCMARMMKW 38400  
\* . \* \*\* . . \* \* \* \* \* . \*\*\*

Bhutan-09015 YWRSRAAYGGMWGRWRRCAYMWTRCYGGSKYRTYMYWWYMTRWGARTMYWTMAGWTTYWR 38460  
Bhutan-09024 YWRSRAATGGMWGRWRRCAYMWTRCYGGSKYRTYMYWWYMTRWGARTMYWTMAGWTTYWR 38460  
Bhutan-09027 YWRSRAATGGMWGRWRRCAYMWTRCYGGSKYRTYMYWWYMTRWGARTMYWTMAGWTTYWR 38460  
Bhutan-09030 YWRSRAAYGGMWGRWRRCAYMWTRCYGGSKYRTYMYWWYMTRWGARTMYWTMAGWTTYWR 38460  
Bhutan-09005 CWASAMRYRRMTRRTGASMYMWRMYCRCKYRWYCCWATAWRWTKRGYAYAWARRAYKYAR 38460  
Indonesia-88035 CAACAAATGGATGATGACCAATGCCCGCGCATCAATATATAGTACATAAGATTTAA 38460  
Indonesia-88045 CAACAAATGGATGATGACCAATGCCCGCGCATCAATATATAGTACATAAGATTTAA 38460  
Indonesia-88065 CWASAMRYGGMTRRTGASMYMWRMYCRCKYRWYCCWATAWRWTKRGYAYAWARRAYKYAR 38460  
. . . . .

Bhutan-09015 TTGAGGWKYMTYKWSRKKRYTYRAWAACWYTGTYCTYKYTYCTCCTYKTMWMMYGYARG 38520  
Bhutan-09024 TTGAGGWKYMTYKWSRKKRYTYRAWAACWYTGTYCTYKYTYCTCCTYKTMWMMYGYARG 38520  
Bhutan-09027 TTGAGGWKYMTYKWSRKKRYTYRAWAACWYTGTYCTYKYTYCTCCTYKTMWMMYGYARG 38520  
Bhutan-09030 TTGAGGWKYMTYKWSRKKRYTYRAWAACAYTGTYCTYKYTYCTCCTYKTMWMMYGYARG 38520  
Bhutan-09005 WTAGAATGCCYCGWSRTGKRYWCGAWRYACKRYCYTGCKYCMCYWCTYCAMYRCRAR 38520  
Indonesia-88035 TYRGGGTGCCTCGTSRTGTGTTCGAAAACACTGTCTTGCTTCMTCTCTTCACCGCAAG 38520  
Indonesia-88045 TYRGGGTGCCTCGWSRTGTGTTCGAAAACACTGTCTTGCTTCMTCTCTTCACCGCAAG 38520  
Indonesia-88065 WTAGRRTGCCYCGWSRTGKRYWCGAWRYACKRYCYTGCKYCMYCYWCTYCAMYRCRAR 38520  
. \*\* . . . .

|                 |                                                              |       |
|-----------------|--------------------------------------------------------------|-------|
| Bhutan-09015    | RCRYWSAKYYCYRRAKTCCMRCKWYRYTCMRTCASCYRKAATATARRRWYKYCYGAGY   | 38580 |
| Bhutan-09024    | RCRYWSAKYYYYRRAKTCCMRCKWYRYTCMRTCASCYRKAATATARRRWYKYCYGAGY   | 38580 |
| Bhutan-09027    | RCRYWSAKYYYYRRAKTCCMRCKWYRYTCMRTCASCYRKAATATARRRWYKYCYGAGY   | 38580 |
| Bhutan-09030    | RCRYWSAKYYYYRRAKTCCMRCKWYRYTCMRTCASCYRKAATATARRRWYKYCYGAGY   | 38580 |
| Bhutan-09005    | GSRYWCRTYYTCGGRGAGYARYGWYGYCYARYCGGYCTATWWWYRARAATCGTCYSWRY  | 38580 |
| Indonesia-88035 | GCACTCATTTCGAGAGCAACGATGTCTCAAYCGCCTATATAYTAAGATCGTCYCYGAGY  | 38580 |
| Indonesia-88045 | GCACTCATTTCGAGAGCAACGATGTCTCAAYCGCCTATATAYTAAGATCGTCYCYGAGY  | 38580 |
| Indonesia-88065 | GSRYWCRTYYTCGGRGAGYARYGWYGYCYARYCGGYCTATWWWYRARAATCGTYYSARY  | 38580 |
|                 | . . . : . . . * . *                                          |       |
| Bhutan-09015    | YGYMYSYGGCTMWCGYYYAAYTRWRVYRAYCRYCSKATGYYYRKYGGRAYYRCKGGRY   | 38640 |
| Bhutan-09024    | YGYMYSYGGCTMWCGYYYAAYTRWRVYRAYCRYCSKATGYYYRKYGGAYYRCKGGRY    | 38640 |
| Bhutan-09027    | YGYMYSYGGCTMWCGYYYAAYTRWRVYRAYCRYCSKATGYYYRKYGGAYYRCKGGRY    | 38640 |
| Bhutan-09030    | YGYMYSYGGCTMWCGYYYAAYTRWRVYRAYCRYCSKATGYYYRKYGGAYYRCKGGRY    | 38640 |
| Bhutan-09005    | YRCMTGCRYYATYACYCRYYRWACAGTGGYGGKRWRCYAGTRGGWYYRGMYSRRCY     | 38640 |
| Indonesia-88035 | YRCMTGCAAYATYRCYCRYYRWACAGTGGYGGKRWRCYAGTRGGWYYRGMYSRRCY     | 38640 |
| Indonesia-88045 | YRCMTGCAAYATYRCYCRYYRWACAGTGGYGGKRWRCYAGTRGGWYYRGMYSRRCY     | 38640 |
| Indonesia-88065 | YRCMTGCRYYATYRCYCRYYRWACAGTGGYGGKRWRCYAGTRGGWYYRGMYSRRCY     | 38640 |
|                 | * * . * * * . * . * * * * * . * *                            |       |
| Bhutan-09015    | RCCGAACYGRYTRSYWTRARARCTCCRTTGRRRGAWRRKKYRMGRYRTGGYKRYRCGKM  | 38700 |
| Bhutan-09024    | RCCGAACYGRYTRSYWTRARARCTCCRTTGRRRGAWRRKKYRMGRYRTGGYKRYRCGKM  | 38700 |
| Bhutan-09027    | RCCGAACYGRYTRSYWTRARARCTCCRTTGRRRGAWRRKKYRMGRYRTGGYKRYRCGKM  | 38700 |
| Bhutan-09030    | RCCGAACYGRYTRSYWTRARARCTCCRTTGRRRGAWRRKKYRMGRYRTGGYKRYRCGKM  | 38700 |
| Bhutan-09005    | RYYSRGSRCRGYCASYTTCGRGWRTCTARCYSGAASGWAGTYRCRGYAGKACKRYTYRKA | 38700 |
| Indonesia-88035 | RYYSRGSRCRGYCASYTTCGRGWRTCTARCYSGAASGWAGTYRCRGYAGKACKRYTYRKA | 38700 |
| Indonesia-88045 | RYYSRGSRCRGYCASYTTCGRGWRTCTARCYSGAASGWAGTYRCRGYAGKACKRYTYRKA | 38700 |
| Indonesia-88065 | RYYSRGSRCRGYCASYTTCGRGWRTCTARCYSGAASGWAGTYRCRGYAGKACKRYTYRKA | 38700 |
|                 | * . . * * * * . * . * . * * * * *                            |       |
| Bhutan-09015    | WKMRRCSCSCTRSRMRYACRKACMRSTYAAAAGACAMWYSCKWYMRCAWTMSTYRSMRGA | 38760 |
| Bhutan-09024    | WKMRRCSCSCTRSRMRYACRKACMRSTYAAAAGACAMWYSCKWYMRCAWTMSTYRSMRGA | 38760 |
| Bhutan-09027    | WKMRRCSCSCTRSRMRYACRKACMRSTYAAAAGACAMWYSCKWYMRCAWTMSTYRSMRGA | 38760 |
| Bhutan-09030    | WKMRRCSCSCTRSRMRYACRKACMRSTYAAAAGACAMWYSCKWYMRCAWTMSTYRSMRGA | 38760 |
| Bhutan-09005    | TGCAGYSMGYGRGRMGCRTYRTWSCGYKTMMWRWSRCATCYKWCMAARYYAAGYAGMGKA | 38760 |
| Indonesia-88035 | TGCAGCCCGYGAGRCGCACGTTCGCCTTAAAGACACATCCGACMAARYYAAGYAGMGGR  | 38760 |
| Indonesia-88045 | TGCAGCCCGYGAGRCGCACGTTCGCCTTAAAGACACATCCGACMAARYYAAGYAGMGGA  | 38760 |
| Indonesia-88065 | TGCAGYSMGYGRGRMGCRTYRTWSCGYKTMMWRWSRCATCYKWCMAARYYAAGYAGMGKA | 38760 |
|                 | . . . * . . . . * . * . * . *                                |       |
| Bhutan-09015    | YWYYSTARATTASMCACMTRYKRYARYMTYWRGRRWYYGATTTTTTGYRRCGAYCWRYRR | 38820 |
| Bhutan-09024    | YWYYSTARATTAGMCACMTRYKRYARYMTYWRGRRWYYGATTTTTTGYRRCGAYCWRYRR | 38820 |
| Bhutan-09027    | YWYYSTARATTACMCACMTRYKRYARYMTYWRGRRWYYGATTTTTTGYRRCGAYCWRYRR | 38820 |
| Bhutan-09030    | YWYYSTARATTAGMCACMTRYKRYARYMTYWRGRRWYYGATTTTTTGYRRCGAYCWRYRR | 38820 |
| Bhutan-09005    | TAMCGYWGRYYGCMAGTRYRCGTCRCGAYCAGKRRATTRRYWWWRYRYGARTSTGTGA   | 38820 |
| Indonesia-88035 | TAMCGYWGRYYGCMAGTRYRCGTCRCGAYCAGKRRATTRRYWWWRYRYGARTSTGTGA   | 38820 |
| Indonesia-88045 | TAMCGYWGRYYGCMAGTRYRCGTCRCGAYCAGKRRATTRRYWWWRYRYGARTSTGTGA   | 38820 |
| Indonesia-88065 | TAMCGYWGRYYGCMAGTRYRCGTCRCGAYCAGKRRATTRRYWWWRYRYGRRTSTGTGA   | 38820 |
|                 | . . * . * . * * * . *                                        |       |
| Bhutan-09015    | YYYTYKARYCRGAAYSWMAAAGGYRTCRCTRCRYRCCRKMMKSRYTYWGYCKYWYTA    | 38880 |
| Bhutan-09024    | YYYTYKARYCRGAAYSWMAAAGGYRTCRCTRCRYRCCRKMMKSRYTYWGYCKYWYTA    | 38880 |
| Bhutan-09027    | YYYTYKARYCRGAAYSWMAAAGGYRTCRCTRCRYRCCRKMMKSRYTYWGYCKYWYTA    | 38880 |
| Bhutan-09030    | YYYTYKARYCRGAAYSWMAAAGGYRTCRCTRCRYRCCRKMMKSRYTYWGYCKYWYTA    | 38880 |

Bhutan-09005 TTTWTWKWRYCGSRGCTSAMRRRRRTCRYIAMWASATGYAAKCMGCAYWTARCTTTATYG 38880  
Indonesia-88035 TTTWTWKWRYMGSRRGCTGAMRRRRRTCRYIAMWASATGYAAKCMGCAYWTARCTTTATYG 38880  
Indonesia-88045 TTTWTWKWRYMGSRRGCTGAMRRRRRTCRYIAMWASATGYAAKCMGCAYWTAGCTTTATYG 38880  
Indonesia-88065 TTTTTKWRYMGSRRGCTSAMRRRRRTCRYIAMWASATGYAAKCMGCAYWTARCTTTATYG 38880  
\* \* \* . . . \* \* . . \* \* . \* . . .

Bhutan-09015 WGYSGCAAACCCCAAGGSWWRGAGTAACYCYMYKRWTACARWAKRYGRYCCYKAGARGY 38940  
Bhutan-09024 WGYSGCAAACCCCAAGGSWWRGAGTAACYCYMYKRWTACARWAKRYGRYCCYKAGARGY 38940  
Bhutan-09027 WGYSGCAAARCCCAAGGSWWRGAGTAACYCYMYKRWTACARWAKRYGRYCCYKAGARGY 38940  
Bhutan-09030 WGYSGCAAARCCCAAGGSWWRGAGTAACYCYMYKRWTACARWAKRYGRYCCYKAGARGY 38940  
Bhutan-09005 WRCSYRCCAGAYRWRSSWWRKRRYMMYYCCMCKRAYGYCGARGAYKAYMCGRRRRRY 38940  
Indonesia-88035 ARCSYRCCAGAYRWRSSWWRKRRYMMYYCCMCKRAYGYCGARGAYKAYMCGRRRRRY 38940  
Indonesia-88045 WRCSYRCCAGAYRWRSSWWRKRRYMMYYCCMCKRAYGYCGARGAYKAYMCGRRRRRY 38940  
Indonesia-88065 WRCSYRCCAGAYRWRSSWWRKRRYMMYYCCMCKRAYGYCGARGAYKAYMCGRRRRRY 38940  
\* . . . . \* \* \* \* \* \* \* \* \* \* \* \*

Bhutan-09015 RGASWKGYRWWGAYAAYS SCGRGYRCCYTTMRMSTACYASSWRARWCSWTWTYMKCG 39000  
Bhutan-09024 RGASWRGYRWWGAYAAYSYRRCGRYRCCYTTMRMSTACYASSWRARWCKYTWTYMKCG 39000  
Bhutan-09027 RGASWGGYRWWGAYAAYSYRRCGRYRCCYTTMRMSTACYASSWRARWCKYTWTYMKCG 39000  
Bhutan-09030 RGASWKGYRWWGAYAAYSYRRCGRYRCCYTTMRMSTACYASSWRARWCKYTWTYMKCG 39000  
Bhutan-09005 ARMCWKGYYRWRRTARYSGCGYSGCGY YWYMAAMSYSRTRSSARRRASGTYYAYTK 39000  
Indonesia-88035 ARMCWMYRWRRTARYSGCGYSGCGY YWYMAAMSYSRTRSSARRRASGTYYAYTK 39000  
Indonesia-88045 ARMCWTKYRWRRTARYSGCGYSGCGY YWYMAAMSYSRTRSSARRRASGTYYAYTK 39000  
Indonesia-88065 ARMCWAKYRWRRTARYSGCGYSGCGY YTTAAAMSYSRTRSSARRRASGTYYAYTK 39000  
. \* \* \* \* \* \* \* . . \* \* . \* \* \* \* . \* .

Bhutan-09015 WRGYAMRGRMGYRTWKRYGCWYAYAA YRGYWRWYTGCYASCGATYWACAYTRYTTGCR 39060  
Bhutan-09024 WRGYAMRGRMGYRTWKRYGCWYAYAA YRGYWRWYTGCYASCGATYWACAYTRYTTGCR 39060  
Bhutan-09027 WRGYAMRGRMGYRTWKRYGCWYAYAA YRGYWRWYTGCYASCGATYWACAYTRYTTGCR 39060  
Bhutan-09030 WRGYAMRGRMGYRTWKRYGCWYAYAA YRGYWRWYTGCYASCGATYWACAYTRYTTGCR 39060  
Bhutan-09005 TRATWAGKWRTRWTTACRTWCWTWTCRRCTR WYRSTMSGACGCWRMYCYGYRRAA 39060  
Indonesia-88035 TRATWAGKWRTRWTTACRTWCWTWTCRRCTR WYRSTMSGACGCWRMYCYGYRRAA 39060  
Indonesia-88045 TRATWAGKWRTRWTTACRTWCWTWTCRRCTR WYRSTMSGACGCWRMYCYGYRRAA 39060  
Indonesia-88065 TRATWAGKWRTRWTTACRTWCWTWTCRRCTR WYRSTMSGACGCWRMYCYGYRRAA 39060  
\* . \* . \* : \* \* \* . \* . \*

Bhutan-09015 KYTAGWGRMYGYWYMCWYKYCRYK KYCCRRYSRATCRGSTGTAYTCWKWCTYGYYYM 39120  
Bhutan-09024 KYTAGWGRMYGYWYMCWYKYCRYK KYCCRRYSRATCRGSTGTAYTCWKWCTYGYYYM 39120  
Bhutan-09027 KYTAGWGAATGYWYMCWYKYCRYK KYCCRRYSRATCRGSTGTAYTCWKWCTYGYYYM 39120  
Bhutan-09030 KYTAGWGRATGYWYMCWYKYCRYK KYCCRRYSRATCRGSTGTAYTCWKWCTYGYYYM 39120  
Bhutan-09005 TTWRSARGCRRTTTAYWTCGCIYACTTTATRGYRSRMKYRSCGKYWTGTWKTMYRYTYM 39120  
Indonesia-88035 TTWRSARGCRRTTTAYWTCGCIYACTTTATRGYRSRMKYRSCGKYWTGTWKTMYRYTYM 39120  
Indonesia-88045 TTWRSARGCRRTTTAYWTCGCIYACTTTATRGYRSRMKYRSCGKYWTGTWKTMYRYTYM 39120  
Indonesia-88065 TTWRSARGCRRTTTAYWTCGCIYACTTTATRGYGGRATYRSCGKYWTGTWKTMYRYTYM 39120  
. . \* . . \* \* \* \* \* . \* \* \* \*

Bhutan-09015 KGCGGTAWGATCACTTKGTAYMSTWKG GYRCARMYWRRRAAARRWYGATYYTYCCTY 39180  
Bhutan-09024 KGCGGTAWGATCACTTKGTAYMSTWKG GYACARMYWRRRAAARRWYGATYYTYCCTY 39180  
Bhutan-09027 KGCGGTAWGATCACTTKGWRYMSTWKG GYRCARMYWRRRAAARRWYGATYYTYCCTY 39180  
Bhutan-09030 KGCGGTAWGATCACTTKGWRYMSTWKG GYRCARMYWRRRAAARRWYGATYYTYCCTY 39180  
Bhutan-09005 GTYARCGWCERYRMYWKATAYMSWTKKATCAYWACYWAAGARGGTTWARYCTCYTYYY 39180  
Indonesia-88035 GTYARCGWCERYRMYWKATAYMSWTKKATCAYWACYWAAGARGGTTWARYCTCYTYYY 39180  
Indonesia-88045 GTYARCGWCERYRMYWKATAYMSWTKKATCAYWACYWAAGARGGTTWARYCTCYTYYY 39180  
Indonesia-88065 GTYARCGWCERYRMYWKATAYMSWTKKATCAYWACYWAAGARGGTTWARYCTCYTYYY 39180

. . \* . . \* . \* . \* . \* . \*

Bhutan-09015 KATCGGRYGCRRKSWTWRYYGYSRGWRAATRRTCYSRRMGCAAWAYTCAKGTGYWWCRR 39240

Bhutan-09024 KATCGGRYGCRRKSWTWRYYGYSRGWRAATRRTCYSRRMGCAAWAYTCAKGTGYWWCRR 39240

Bhutan-09027 KATCGGRYGCRRKSWTWRYYGYSRGWRAATRRTCYSRRMGCAAWAYTCAKGTGYWWCRR 39240

Bhutan-09030 KATCGGRYGCRRKSWTWRYYGYSRGWRAATRRTCYSRRMGCAAWAYTCAKGTGYWWCRR 39240

Bhutan-09005 TGGAARRYATAGKGTAGTCKCGAAWRMRWGGASTTGAGATGGRARTKYRTRYRCWTYGA 39240

Indonesia-88035 TGGAARRYATAGKGTAGTCKCGAAWRMRWGGASTTGAGATGGRARTKYRTRYRCWTYGA 39240

Indonesia-88045 TGGAARRYATAGKGTAGTCKCGAAWRMRWGGASTTGAGATGGRARTKYRTRYRCWTYGA 39240

Indonesia-88065 TGGAARRYATAGKGTAGTCKCGAAWRMRWGGASTTGAGATGGRARTKYRTRYRCWTYGA 39240

. . . \* . \* . . \* . . \* . . \*

Bhutan-09015 YAYKAATCCYCYCYGTGCWMIYACTWKRRRCTWYYRKYATRAAGGYRGGGGKARYAWY 39300

Bhutan-09024 YAYKAATCCYCYCYGTGCWMIYACTWKRRRCTWYYRKYATRAAGGYRGGGGKARYAWY 39300

Bhutan-09027 YAYKAATCCYCYCYGTGCWMIYACTWKRRRCTWYYRKYATRAAGGYRGGGGKARYAWY 39300

Bhutan-09030 YAYKAATCCYCYCYGTGCWMIYACTWKRRRCTWYYRKYATRAAGGYRGGGGKARYAWY 39300

Bhutan-09005 YMTTWRYYYCMTYTRYRYTAYCRYCTTARRYGWYTCRTYRGRRRRTYRSKCKWMTGWT 39300

Indonesia-88035 YMTTWRYYYCMTYTRYRYTAYCRYCTTARRYGWYTCRTYRGRRRRTYRSKCKWMTGWT 39300

Indonesia-88045 YMTTWRYYYCMTYTRYRYTAYCRYCTTARRYGWYTCRTYRGRRRRTYRSKCKWMTGWT 39300

Indonesia-88065 YMTTWRYYYCMTYTRYRYTAYCRYCTTARRYGWYTCRTYRGRRRRTYRSKCKWMTGWT 39300

\* . . \* . \* . \* . \* . \*

Bhutan-09015 TRYMYRGRCKTACARGTYRRGRGRGWMCCRWWGRMASGWYCYGGCRGYGGRWRRG 39360

Bhutan-09024 TRYMYRGRCKTACARGTYRRGRGRGWMCCRWWGRMASGWYCYGGCRGYGGRWRRG 39360

Bhutan-09027 TRYMYRGRCKTACARGTYRRGRGRGWMCCRWWGRMASGWYCYGGCRGYGGRWRRG 39360

Bhutan-09030 TRYMYRGRCKTACARGTYRRGRGRGWMCCRWWGRMASGWYCYGGCRGYGGRWRRG 39360

Bhutan-09005 KRCCMTRRRYGYGYRGAYRAAGRGRRTAYRWWRRRCMGSWYCTCSRYRCTAARTTGAG 39360

Indonesia-88035 KRCCMTRRRYGYGYRGAYRAAGRGRRTAYRWWRRRCMGSWYCTCSRYRCTAARTTGAR 39360

Indonesia-88045 KRCCMTRRRYGYGYRGAYRAAGRGRRTAYRWWRRRCMGSATCTCSRYRCTAARTTGAR 39360

Indonesia-88065 KRCCMTRRRYGYGYRGAYRAAGRGRRTAYRWWRRRCMGSWYCTCSRYRCTAARTTGAG 39360

. \* \* \* . . \* . \* \* \* \* . . \* . \*

Bhutan-09015 TRTKYCRTGCRTTCGGTMSGWRCWTGSSGYRRYARCTRRRCYGMACRAKGSRSAYRGTKRR 39420

Bhutan-09024 TRTKYCRTGCRTTCGGTMSGWRCWTGSSGYRRYARCTRRRCYGMACRAKGSRSAYRGTKRR 39420

Bhutan-09027 TRTKYCRTGCRTTCGGTMSGWRCWTGSSGYRAYARCTRACCGMACRAKGSRSAYRGTKRR 39420

Bhutan-09030 TRTKYCRTGCRTTCGGTMSGWRCWTGSSGYRRYARCTRRCCGMACRAKGSRSAYRGTKRR 39420

Bhutan-09005 CAYTYRYSRYSRYCYRKWACRWGMYTSSRYAACWGYCRAYCRMWSGMKRSRSGTARYTGG 39420

Indonesia-88035 CAYTYRYSRYSRYCYRKWACRWGMYTSSRYAACWGYCRAYCAMWSGMKRSRSGTARYTGG 39420

Indonesia-88045 CAYTYRYSRYSRYCYRKWACRWGMYTSSRYAACWGYCRAYCAMWSGMKRSRSGTARYTGG 39420

Indonesia-88065 CACTYRYSRYSRYCYRKWACRWGMYTSSRYAACWGYCRAYCAMWSGMKRSRSGTARYTGG 39420

. \* \* . . \* \* \* \* \* \* . \* \* \* .

Bhutan-09015 CARAAATYGATSSRCCYWTCTKMRYKTKWGTCCAGAACRMYCWYRTYRGRKRGYATYR 39480

Bhutan-09024 CARAAATYGATSSRCCYWTCTKMRYKTKWGTCCAGAACRMYCWYRTYRGRKRGYATYR 39480

Bhutan-09027 CARAAATYGATSSRCCYWTCTKMRYKTKWGTCCAGAACRMYCWYRTYRGRKRGYATYR 39480

Bhutan-09030 CARAAATYGATSSRCCYWTCTKMRYKTKWGTCCAGAACRMYCWYRTYRGRKRGYATYR 39480

Bhutan-09005 MRGRCKRCKARKCCKYMTWYTGKMYRTTKWKKCYMMRWMYRMYATYAYYGSKAGRCWKCA 39480

Indonesia-88035 MRGRCKRCKARKCCKYMTWYTGKMYRTTKWKKCYMMRWMYRMYATYAYYGSKAGRCWKCA 39480

Indonesia-88045 MRGRCKRCKARKCCKYMTWYTGKMYRTTKWKKCYMMRWMYRMYATYAYYGSKAGRCWKCA 39480

Indonesia-88065 MRGRCKRCKARKCCKYMTWYTGKMYRTTKWKKCYMMRWMYRMYATYAYYGSKAGRCWKCA 39480

. . . . . : \* \* \* \* . \* \* \* \* \* . \* \* \* .

Bhutan-09015 YRCCAAGYACTRYKGCATRWAKACYKYTCRGRGRTGRRACGCCTCGYRGRYWRKRR 39540

Bhutan-09024 YRCCAAGYACTRYKGCATRWAKACYKYTCRGRGRTGRRACGCCTCGYRGRYWRKRR 39540

Bhutan-09027 YRCCAAGYACTRYKGCATRWAKACYKYTCRGRGRTGRRAACGCCTCGYCRRGYWRTRR 39540  
 Bhutan-09030 YRCCAAGYACTRYKGCATRWAKACYKYTCRGRGRTGRRAACGCCTCGYCRRGYWRTRR 39540  
 Bhutan-09005 CAMYRMCTRYYGTKRYKTAGAWMKMMTGCTYARGRGYAAARWRRTTYKXSATSARRYTRGAG 39540  
 Indonesia-88035 CAMYRMCTRYYGTKRYKTAGAWMKMMTGCTYARGRGYAAARWRRTTYKXSATSARRYTRGAG 39540  
 Indonesia-88045 CAMYRMCTRYYGTKRYKTAGAWMKMMTGCTYARGRGYAAARWRRTTYKXSATSARRYTRGAG 39540  
 Indonesia-88065 CAMYRMCTRYYGTKRYKTAGAWMKMMTGCTYARGRGYAAARWRRTTYKXSATSARRYTRGAG 39540  
 \* \* \* . \* . . \* \* \*

Bhutan-09015 YYACYRWAWKRWCYWTYARTYSKGGYTYKGRGCGCCCTCTTGCKCYARYSYYTTCACKCYA 39600  
 Bhutan-09024 YYACYRWAWKRWCYWTYARTYSKGGYTYKGRGCGCCCTCTTGCKCYARYSYYTTCACKCYA 39600  
 Bhutan-09027 YYACYRWAWKRWCYWTYARTYSKGGYTYKGRGCGCCCTCTTGCKCYARYSYYTTCACKCYA 39600  
 Bhutan-09030 YYACYRWAWKRWCYWTYARTYSKGGYTYKGRGCGCCCTCTTGCKCYARYSYYTTCACKCYA 39600  
 Bhutan-09005 CYGYRWRWTFGAMYWKYWRWTSTKKYYTGRRGKYGYYYYAAGTTRATCYCGSWSKYTA 39600  
 Indonesia-88035 CYGYRWRWTFGAMYWKYWRWTSTKKYYTGRRGKYGYYYYAAGTTRATCYCGSWSKYTR 39600  
 Indonesia-88045 CYGYRWRWTFGAMYWKYWRWTSTKKYYTGRRGKYGYYYYAAGTTRATCYCGSWSKCTR 39600  
 Indonesia-88065 CYGYRWRWTFGAMYWKYWRWTSTKKYYTGRRGKYGYYYYAAGTTRATCYCGSWSKYTR 39600  
 \* . \*\*\* \* . \*\* . \* \* \* . \* \* . . . \*\* . . \*

Bhutan-09015 YYRRRRCAGSSRMSSACTCWYCYRMRMRKTGCRTYATYRYMRTCGCGCTTCYYYWGCTT 39660  
 Bhutan-09024 YYRRRRCAGSSRMSSACTCWYCYRMRMRKTGCRTYATYRYMRTCGCGCTTCYYYWGCTT 39660  
 Bhutan-09027 YYRRRRSAGSSRMSSACTCWYCYRMRMRKTGCRTYATYRYMRTCGCGCTTCYYYWGCTT 39660  
 Bhutan-09030 YYRRRRSAGSSRMSSACTCWYCYRMRMRKTGCRTYATYRYMRTCGCGCTTCYYYWGCTT 39660  
 Bhutan-09005 TYGGAACGRGSGCSRMWYTYGGAARGYRYAYTMCYATMTRGYKYSYYTTCYWRYYT 39660  
 Indonesia-88035 TYGGAACGRGSGCSRMWYTYGGAARGYRYAYTMCYATMTRGYKYSYYTTCYWRYYW 39660  
 Indonesia-88045 TYGGAACGRGSGCSRMWYTYGGAARGYRYAYTMCYATMTRGYKYSYYTTCYWRYYW 39660  
 Indonesia-88065 TYGGAACGRGSGCSRMWYTYGGAARGYRYAYTMCYATMTRGYKYSYYTTCYWRYYT 39660  
 \* . . . . \* \*\* . . \*

Bhutan-09015 ASSRYKYGWCAACTCMRTARKGGKGTYYMGYMRGTYSYGCAGRAAAAARSWGSRRYAG 39720  
 Bhutan-09024 ASSRYKYGWCAACTCMRTARKGGKGTYYMGYMRGTYSYGCAGRAAAAARSWGSRRYAG 39720  
 Bhutan-09027 ASSRYKTGWCAACTCMRTARKGGKGTYYMGYMRGTYSYGCAGRAAAAARSWGSRRYAG 39720  
 Bhutan-09030 ASSRYKYGWCAACTCMRTARKGGKGTYYMGYMRGTYSYGCAGRAAAAARSWGSRRYAG 39720  
 Bhutan-09005 WGSRTTTCRWSRRTYARKRAGRRAKAGCTTCSYMRRCYSYKRTAMWRRRSTRGAGCRK 39720  
 Indonesia-88035 AGCGTTTCRWCATTYARKRAGRRAKAGCTTCSYMRRCYSYKRTAMWRRRSTRGAGCRK 39720  
 Indonesia-88045 AGCGTTTCRWCATTYARKRAGRRAKAGCTTCSYMRRCYSYKRTAMWRRRSTRGAGCRK 39720  
 Indonesia-88065 WGSRTTTCRWSRRTYARKRAGRRAKAGCTTCSYMRRCYSYKRTAMWRRRSTRGAGCRK 39720  
 . . . \* . \* . \* . \*\*\* \*\* \*\* .

Bhutan-09015 RRCRTYYTTAARSYKAGRYRATCTRYARSRGCYCYCYCYKRWRMYYYYRRTAATRR 39780  
 Bhutan-09024 RRCRTYYTTAARSYKAGRYRATCTAYARSRGCYCYCYCYKRWRMYYYYRRTAATRR 39780  
 Bhutan-09027 RRCRTYYTTAARSYKAGRYRATCTRYARSRGCYCYCYCYKRWRMYYYYRRTAATRR 39780  
 Bhutan-09030 RRCRTYYTTAARSYKAGRYRATCTRYARSRGCYCYCYCYKRWRMYYYYRRTAATRR 39780  
 Bhutan-09005 RASACTCYRRRSCTRCAGTAGWSYRTRAGRYYGYTTYYTKRWRMYCCYAAAKRWCGG 39780  
 Indonesia-88035 RASACTCYRRRSCTRCAGTAGWSYRTRAGRYYGYTTYYTKRWRMYCCYAAAKRWCGG 39780  
 Indonesia-88045 RASACTCYRRRSCTRCAGTAGWSYATRAGRYYGYTTYYTKRWRMYCCYAAAKRWCGG 39780  
 Indonesia-88065 RASACTCYRRRSCTRCAGTAGWSYRTRAGRYYGYTTYYTKRWRMYCCYAAAKRWCGG 39780  
 \* . \*\* . . . . \* \* \* \*\*\*\*\* \*

Bhutan-09015 AYRKSAYYTCCYRMWYWYCKKWCRCRWRWGSWGCRCCTTACYTYAYGCMYTTTKYAGC 39840  
 Bhutan-09024 AYRKSAYYTCCYRMWYWYCKKWCRCRWRWGSWGCRCCTTACYTYAYGCMYTTTKYAGC 39840  
 Bhutan-09027 AYRKSAYYTCCYRMWYWYCKKWCRCRWRWGSAGCGCTTACYTYAYGCMYTTTKYASC 39840  
 Bhutan-09030 AYRKSAYYTCCYRMWYWYCKKWCRCRWRWGSAGCGCTTACYTYAYGCMYTTTKYASC 39840  
 Bhutan-09005 CTATCCWYWYWYRMWYTYCYGTAMTRKWATGCSAGCGTCCMMYCYWCKTCTTWYKYMCT 39840  
 Indonesia-88035 CTATCCWYWYWYRMWYTYCYGTAMTRKWATGTSAGMGTCMMYCYWCKTCTTWYKYMCT 39840



Indonesia-88045 CTATCCWYIWYIYRMWYTYCYGTAMTRKWATGCSATCGTCCMMYCYWCKTCKWKYKYMCT 39840  
Indonesia-88065 CTATCCWYIWYIYRMWYTYCYGTAMTRKWATKCSARCGTCCMMYCYWCKTCTWYKYMCT 39840  
. . . \* \* \* \* \* \* . \* \* \* \* \* . \* \*

Bhutan-09015 RCTSWAYRYSSAYIYMYWRYCTRRCASTMYMATRRWSCRYSYRSYRMKCCRTTATARRGT 39900  
Bhutan-09024 RCTSWAYRYSSAYIYMYWRYCTRRCASTMYMATRRWSCRYSYRSYRMKCCRTTATARRGT 39900  
Bhutan-09027 RCTSWAYRYSSAYIYMYWRYCTRRCASTMYMATRRWSCRYSYRSYRMKCCRTTATARRGT 39900  
Bhutan-09030 RCTSWAYRYSSAYIYMYWRYCTRRCASTMYMATRRWSCRYSYRSYRMKCCRTTATARRGT 39900  
Bhutan-09005 AYSWYMGTTGGRYTTCTAGYIYAAYSYCYAWWAGACTAYGYACCRMKYSGGYWKMRGRC 39900  
Indonesia-88035 ATYCWYMGTTGGRYTTCTAGYIYAAYSYCYAWWAGACTAYGYACCRMKYSGGYWKMRGRY 39900  
Indonesia-88045 ATYCWYMGTTGGRYTTCTAGYIYAAYSYCYAWWAGACTAYGYACCRMKYSGGYWKMRGRT 39900  
Indonesia-88065 AYSWYMGTTGGRYTTCTAGYIYAAYSYCYAWWAGACTAYGYACCRMKYSGGYWKMRGRC 39900  
. \* \* . . \* \* \* \* \* . \* . \* \* \* . \* \*

Bhutan-09015 TTGWTTYRTGWYTTACYYGCTCCCGATYRCARYYWRWYWKRWKAMRKRTGRARMCMMMW 39960  
Bhutan-09024 TTGWTTYRTGWYTTACYYGCTCCCGATYRCARYYWRWYWKRWKAMRKRTGRARMCMMMW 39960  
Bhutan-09027 TTGWTTYRTGWYTTACYYGCTCCCGATYRCARYYWRWYWKRWKAMRKRTGRARMCMMMW 39960  
Bhutan-09030 TTGWTTYRTGWYTTACYYGCTCCCGATYRCARYYWRWYWKRWKAMRKRTGRARMCMMMW 39960  
Bhutan-09005 CCAWCCYAARTCYCWYCCRYWYMRCCASWATCTAATATGRWGWCATRYSRGRCMMMMT 39960  
Indonesia-88035 YYRTCCYAARTCYCWYCCRYWYMRCCASWATCTAATATGRWGWCATRYSRGRCMMMMT 39960  
Indonesia-88045 TTGTCCYAARTCYCWYCCRYWYMRCCASWATCTAATATGRWGWCATRYSRGRCMMMMT 39960  
Indonesia-88065 CCATCCYAARTCYCWYCCRYWYMRCCASWATCTAATATGRWGWCATRYSRGRCMMMMT 39960  
\* : . \* \* \* \* \* . \* \* \* \* \* \* \* \* \* \* \* \* \*

Bhutan-09015 KMYRSRCMGSRGKSWGRRCRCYWKGRTRWGTARARCYKTAATMRTTYKSKAWWYKY 40020  
Bhutan-09024 KMYRSRCMGSRGKSWGRRCRCYWKGRTRWGTARARCYKTAATMRTTYKSKAWWYKY 40020  
Bhutan-09027 KMYRSRYMGSRGKSWGRRCRCYWKGRTRWGTARARCYKTAATMRTTYKSKAWWYKY 40020  
Bhutan-09030 KMYRSRYMGSRGKSWGRRCRCYWKGRTRWGTARARCYKTAATMRTTYKSKAWWYKY 40020  
Bhutan-09005 KMYACGYRCKGGRACKWKAGYAYATARRRYRTRACRRGCKTGKCRWYKGTWWTTC 40020  
Indonesia-88035 KMYACGYRCKGGRACKWKAGYAYATARRRYRTRACRRGCKTGKCRWYKGTWWTTC 40020  
Indonesia-88045 KMYACGYRCKGGRACKWKAGYAYATARRRYRTRACRRGCKTGKCRWYKGTWWTTC 40020  
Indonesia-88065 KMYACGYRCKGGRACKWKAGYAYATARRRYRTRACRRGCKTGKCRWYKGTWWTTC 40020  
\* \* \* . . \* \* \* \* . \* \* \* : \* \* \* \* \* . . . . .

Bhutan-09015 RYYYGKMKMSYAYSRRYYGTKTTRRRMCRYTWKAGCCTTYSRWTYCCCSGYWCCTTRAYY 40080  
Bhutan-09024 RYYYGKMKMSYAYSRRYYGTKTTRRRMCRYTWKAGCCTTYSRWTYCCCSGYWCCTTRAYY 40080  
Bhutan-09027 RYYYGKMKMSYAYSRRYYGTKTTRRRMCRYTWKAGCCTTYSRWTYCCCSGYWCCTTRAYY 40080  
Bhutan-09030 RYYYGKMKMSYAYSRRYYGTKTTRRRMCRYTWKAGCCTTYSRWTYCCCSGYWCCTTRAYY 40080  
Bhutan-09005 RYCTRTCKACCMCCGRYKWKYRRMMRTKTKRKYKKTGAWYSSMCATYAYAGMTT 40080  
Indonesia-88035 ACCTGTGACCMYCGACTGTGTTAGACCATTGAGCCTTTGAWYSSMCATYAYAGMTT 40080  
Indonesia-88045 ACCTGTGACCMYCGACTGTGTTAGACCATTGAGCCTTTGAWYSSMCATYAYAGMTT 40080  
Indonesia-88065 RYCTRTCKACCMCCGRYKWKYRRMMRTKTKRKYKKTGAWYSSMCATYAYAGMTT 40080  
. . . . . \* \* \* \* \* . :

Bhutan-09015 WSCWAMKRWAYYRRTWGWRSYCKGYRSAMYCRATMGMTGTYRMYRMTAYTGCTCKRWT 40140  
Bhutan-09024 WSCWAMKRWAYYRRTWGWRSYCKGYRSAMYCRATMGMTGTYRMYRMTAYTGCTCKRWT 40140  
Bhutan-09027 WSCWAMKRWAYYRRTWGWRSYCKGYRSAMYCRATMGMTGTYRMYRMTAYTGCTCKRWT 40140  
Bhutan-09030 WSCWAMKRWAYYRRTWGWRSYCKGYRSAMYCRATMGMTGTYRMYRMTAYTGCTCKRWT 40140  
Bhutan-09005 WSMARCKGARYYAGYATAAAGSYMTRCRGMATYGCCCRMYCKCAAAYRCYWKRYWYGAA 40140  
Indonesia-88035 WSMARCKGARYYAGYATAAAGSYMTRCRGMATYGCCCRMYCKCAAAYRCYWKRYWYGAA 40140  
Indonesia-88045 WSMARCKGARYYAGYATAAAGSYMTRCRGMATYGCCCRMYCKCAAAYRCYWKRYWYGAA 40140  
Indonesia-88065 WSMARCKGARYYAGYATAAAGSYMTRCRGMATYGCCCRMYCKCAAAYRCYWKRYWYGAA 40140  
\* \* \* \* \* . . \* \* \* . \* \* \* \* \* .

Bhutan-09015 CTTRKTYRYMSCMARKSCWYYRRCRTGYAKRMYCCTYTATATYYRCTRYKYTGRRGGYA 40200  
 Bhutan-09024 CTTRKTYRYMSCMARKSCWYYRRCRTGYAKRMYCCTYTATATYYRCTRYKYTGRRGGYA 40200  
 Bhutan-09027 CTTRKTYRYMSCMAATSCWYYAACRTGYAKRMYCCTYTATATYYRCTRYKYTGRRGGYA 40200  
 Bhutan-09030 CTTRKTYRYMSCMARKSCWYYAACRTGYAKRMYCCTYTATATYYRCTRYKYTGRRGGYA 40200  
 Bhutan-09005 SAARGYYATMG MAGGGY WYCGGYMGYR CAGAATCYTTTRTAKTGCTGCTTTGAGTCCA 40200  
 Indonesia-88035 SAARGYYATMG MAGGGY WYCGGYMGYR CAGAATCYTTTRTAKTGCTGCTTTGAGTCCR 40200  
 Indonesia-88045 SAARGYYATMG MAGGGY WYCGGYMGYR CAGAATCYTTTRTAKTGCTGCTTTGAGTCCR 40200  
 Indonesia-88065 SAARGYYATMG MAGGGY WYCGGYMGYR CAGAATCYTTTRTAKTGCTGCTTTGAGTCCA 40200

.:.\* \* \*. . . \*\* . .

Bhutan-09015 TCTATGRCCRATARGCRYRWCYRYYYGTTTTTRTKAYGGMTSYCYARRCCYGRYYATWAAG 40260  
 Bhutan-09024 TMTATGRCCRATARGCRYRWCYRYYYGTTTTTRTKAYGGMTSYCYARRCCYGRYYATWAAG 40260  
 Bhutan-09027 TCTATGRCCRATARGCRYRWCYRYYYGTTTTTRTKAYGGMTSYCYARRCCYGRYYATWAAG 40260  
 Bhutan-09030 TCTATGRCCRATARGCRYRWCYRYYYGTTTTTRTKAYGGMTSYCYARRCCYGRYYATWAAG 40260  
 Bhutan-09005 CCCGYGGYWG YRARYACGAYRTCYTRYYYWRKKAYGGCKSYCYGAGTSCRRCWWYTMRR 40260  
 Indonesia-88035 CACGTAGYWG YRARYACGAYRTCYTRYYYWRKKAYGGCKSYCYGAGTSCRRCWWYTMAG 40260  
 Indonesia-88045 CCCGTTGYWG YRARYACGAYRTCYTRYYYWRKKAYGGCKSYCYGAGTSCRRCWWYTCAG 40260  
 Indonesia-88065 CTCGTAGYWG YRARYACGAYRTCYTRYYYWRKKRCCRCKSYCYGAGTSCRRCWWYTMRR 40260

. \* \* \*. \* . \* :

Bhutan-09015 CYWGRMYYYRRGCCGMGCTYWYYRAGGTRCRCCATCTRRWMCTY AAYWTGKWMAMSKSK 40320  
 Bhutan-09024 CYWGRMYYYRRGCCGMGCTYWYYRAGGTRCRCCATCTRRWMCTY AAYWTGKTCAMSKSK 40320  
 Bhutan-09027 CYWGRMYYTARGCCGMGCTYWYYRAGGTRCRCCATCTRRWMCTY AAYWTGKWMAMSKSK 40320  
 Bhutan-09030 CYWGRMYYYRRGCCGMGCTYWYYRAGGTRCRCCATCTRRWMCTY AAYWTGKWMAMSKSK 40320  
 Bhutan-09005 YTWAGATYCGGGRYTRCRYWCACYRCKKYAARGTCTCTCGGTMWTWRATAKSTAMGACGCK 40320  
 Indonesia-88035 CTWAGATYCGGGRYTRCRYWCACYRGGY AARGTYTCTCGGTMWTWRATAKSTAMGACGCK 40320  
 Indonesia-88045 CTWAGATYCGGGRYTRCRYWCACYRGGY AARGTCTCTCGGTMWTWRATAKSTAMGACGCK 40320  
 Indonesia-88065 YTWAGATYCGGGRYTRCRYWCACYRCKKYAARGTCTCTCGGTMWTWRMTAKSTAMGACGCK 40320

\*. \* \*\* . \* : \* . . . \*

Bhutan-09015 AWGASGCYTAAGSYCKYAKYWMRRTKTKYAKACAGRTWYRRCYRCSKAAWTGAATGTC 40380  
 Bhutan-09024 AWGASGCYTAAGSYCKYAKYWMRRTKTKYAKACAGRTWYRRCYRCSKAAWTGAATGTC 40380  
 Bhutan-09027 AWGASGCYTAAGSYCKYAKYWMRRTKTKYAKACAGRTWYRRCYRCSKAAWTGAATGTC 40380  
 Bhutan-09030 AWGASGCYTAAGSYCKYAKYWMRRTKTKYAKACAGRTWYRRCYRCSKAAWTGAATGTC 40380  
 Bhutan-09005 CTRGCACCARAASCCKTMKYAAMAYGGKYTRGMYRKAWWCCGACTRCGTAAWRRRYAAT 40380  
 Indonesia-88035 CTRGCAYCARWASCCKTMKYAAMAYGGKYTRGMYRKAWWCCGAYY GSKRRWRRRYAAT 40380  
 Indonesia-88045 CTRGCAYCARWASCCKTMKYAAMAYGGKYTRGMYRKAWWCCGAYY GSKRRWRRRYAAT 40380  
 Indonesia-88065 CTRGCACCARAASCCKTMKYAAMAYGGKYTRGMYRKAWWCCGACTRCGKAAWRRRYAAT 40380

. . . : . \* \* \*\* \* \* . . . \* . :

Bhutan-09015 TTGWRMRRTKWRRRAYCWRCYKCAYGKYYTAYCGWGGTRKACACRAWYKYRACRTRWKY 40440  
 Bhutan-09024 TTGWRMRRTKWRRRAYCWRCYKCAYGKYYTAYCGWGGTRKACACRAWYKYRACRTRWKY 40440  
 Bhutan-09027 TTGWRMRRTKWRRRAYCWRCYKCAYGKYYTAYCGWGGTRKACACRAWYKYRACRTRWKY 40440  
 Bhutan-09030 TTGWRMRRTKWRRRAYCWRCYKCAYGKYYTAYCGWGGTRKACACRAWYKYRACRTRWKY 40440  
 Bhutan-09005 YWGTRAGGWKTWGGRCGTAYTCTSMYSKYTYMYTYGRRGGTCWCMMAWATTCGATYRWKC 40440  
 Indonesia-88035 YWRTAAGGYTTAGGRCGTAYTCTCATGTCCWACYRTGRTGTWYAMAWATTCGATYRWKC 40440  
 Indonesia-88045 YWRTAAGGYTTAGGRCGTAYTCTCATGTCCWACCATGRTGTWYAMAWATTCGATYRWKC 40440  
 Indonesia-88065 YWGTRAGGWKTWGGRCGTAYTCTSMYSKYTYMYTYGRRGGTCWCMMAWATTCGATYRWKC 40440

. . . . . : \*\*\*

Bhutan-09015 RAYAWCTYSACTRTRCRRYSAKMTCWWYCKMSYCWTSWYCMCGAYAKTKWYRWSYYTR 40500  
 Bhutan-09024 RAYAWCTYSACTRTRCRRYSAKMTCWWYCKMSYCWTSWYCMCGAYAKTKWYRWSYYTR 40500  
 Bhutan-09027 RAYAWCTYSACTRTRCRRYSAKMTCWWYCKMSYCWTSWYCMCGAYAKTKWYRWSYYTR 40500  
 Bhutan-09030 RAYAWCTYSACTRTRCRRYSAKMTCWWYCKMSYCWTSWYCMCGAYAKTKWYRWSYYTR 40500

Bhutan-09005 ACTRMTWCSWYKRYKYSGRSRSYRGAYYTTYKACYSTYGSWYCAIRMYAKYKACGTSTCCR 40500  
Indonesia-88035 ACTRMTWCCWYKRYKYSGRSRSYRGAYYTTYKACYSTYGSWYIMTRMYWKYGACGTGTCCA 40500  
Indonesia-88045 ACTRMTWCSWYKRYKYSGRSRSYRGAYYTTYKACYSTYGSWYIAYRMYWKYGACGTGTCCA 40500  
Indonesia-88065 ACTRMTWCSWYKRYKYSGRSRSYRGAYYTTYKACYSTYGSWYIAYRAYAKYKACGTSTCCR 40500  
. . \* . . \* . \*\* \* \* . \* . \*\*\* \* \*

Bhutan-09015 RTRWRTCWRGKGYTTYMAYMGWYKMYCTAACTARAWCKRCRYWRRYSRSAAGRTGCK 40560  
Bhutan-09024 RTRWRTCWRGKGYTTYMAYMGWYKMYCTAACTARAWCKRCRYWRRYSRSAAGRTGCK 40560  
Bhutan-09027 RTRWRTCWRGKGYTTYMAYMGWYKMYCTAACTARAWCKRCRYWRRYSRSAAGRTGCK 40560  
Bhutan-09030 RTRWRTCWRGKGYTTYMAYMGWYKMYCTAACTARAWCKRCRYWRRYSRSAAGRTGCK 40560  
Bhutan-09005 RYRTAKCWRRTKCCWYCARCYCRAYTARTYARSYWAMMYKGYACYTRATSRSWRSRYKYK 40560  
Indonesia-88035 GTATATYTAATTCCWTCAYCRACATACTMACTAAAMCGGCACCTTRATGGSARSRYKYK 40560  
Indonesia-88045 GTATATYTAATTCCWTCAYCRACATACTMACTAAAMCGGCACCTTRATGGSARSRYKYK 40560  
Indonesia-88065 RYRTAKCWRRTKCCWYCARCYCRAYTARTYAAASYWAMMYKGYACYTRATSRSWRSRYKYK 40560  
. . \* . . \* . \*\* \* \* . \* . \*\*\* \* \*

Bhutan-09015 CGAMKWYSRRGWAMRGYGTWWSAMGSTGCYKAKYCATTAAGRYSCRRCGAKYTTSGRM 40620  
Bhutan-09024 CGAMKWYSRRGWAMRGYGTWWSAMGSTGCYKAKYCATTAAGRYSCRRCGAKYTTSGRM 40620  
Bhutan-09027 CGAMKWYSRRGWAMRGYGTWWSAMGSTGCYKAKYCATTAAGRYSCRRCGAKYTTSGRM 40620  
Bhutan-09030 CGAMKWYSRRGWAMRGYGTWWSAMGSTGCYKAKYCATTAAGRYSCRRCGAKYTTSGRM 40620  
Bhutan-09005 CGGCTWCGGRGTTTCRSTASATATGGMGCTRSYRKRITYTWKGTTRAYGSARYRMTYYYGRGM 40620  
Indonesia-88035 YRGCTWCGGRKTTTCRSTASATATGGMRCRKSRYRKRITYTWKGTTRAYGSARYRMTYYYGRGM 40620  
Indonesia-88045 YRGCTWCGGRKTTTCRSTASATATGGMRCRKSRYRKRITYTWKGTTRAYGSARYRMTYYYGRGM 40620  
Indonesia-88065 CGGCTWCGGRGTTTCRSTASATATGGMGCTRSYRKRITYTWKGTTRAYGSARYRMTYYYGRGM 40620  
. . \* . \* : \* . . : . . \* . . \* \* \* . . . \* . . \* . \* . \*

Bhutan-09015 TCYCAWRTWWYAGYRYAYCRRRKYGYMYCYRRWRRYGGTGMCRGAGCTAWCCTRWAYYGS 40680  
Bhutan-09024 TCYCAWRTWWYAGYRYAYCRRRKYGYMYCYRRWRRYGGTGMCRGAGCTAWCCTRWAYYGS 40680  
Bhutan-09027 TCYCAWRTWWYAGYRYAYCRRRKYGYMYCYRRWRRYGGTGMCRGAGCTAWCCTRWAYYGS 40680  
Bhutan-09030 TCYCAWRTWWYAGYRYAYCRRRKYGYMYCYRRWRRYGGTGMCRGAGCTAWCCTRWAYYGS 40680  
Bhutan-09005 YYYGCWRYWWYWRRCRCMRYRRGGCCSMYMGAAARRYSKKAAGCTATAGAYSWAARYYAC 40680  
Indonesia-88035 YYYGCWRYWWYWRRCRCMRYRRGGCCSMYMGAAARRYSKKAAGCTATAGAYSWAARYYAC 40680  
Indonesia-88045 YYYGCWRYWWYWRRCRCMRYRRGGCCSMYMGAAARRYSKKAAGCTATAGAYSWAARYYAC 40680  
Indonesia-88065 YYYGCWRYWWYWRRCRCMRYRRGGCCSMYMGAAARRYSKKAAGCTATAGAYSWAARYYAC 40680  
\* . \*\* \*\*\* \* \*\* . \*\* \*\*\* .. :. :. . \*\*\*..

Bhutan-09015 ACTMRRRTTSMRRWACRGKYTTYRATGRSRAYKWRMRCKTSRSTRYTRGKTWTGWTA 40740  
Bhutan-09024 ACTMRRRTTSMRRWACRGKYTTYRATGRSRAYKWRMRCKTSRSTRYTRGKTWTGWTA 40740  
Bhutan-09027 ACTMRRRTTSMRRWACRGKYTTYRATGRSRAYKWRMRCKTSRSTRYTRGKTWTGWTA 40740  
Bhutan-09030 ACTMRAAGTSMRRWACRGKYTTYRATGRSRAYKWRMRCKTSRSTRYTRGKTWTGWTA 40740  
Bhutan-09005 RYYMGGAYTSGCRAWWYARKTKYCARYSRRTGWGAAYKYSASCAAYGRTTWTSTKGR 40740  
Indonesia-88035 RYYCGGATTCGCAATACAGTTTTTCARYGSRATGAGAACGTSASCAAYGRTYWCSTKGR 40740  
Indonesia-88045 RYYCGGATTCGCAATACAGTTTTTCARYGSRATGAGAACGTSASCAAYGRTYWCSTKGG 40740  
Indonesia-88065 RYYCGGAYTSGCRAWWYARKTKYCARYSRRTGTGAAYKYSASCAAYGRTTWTSTKGR 40740  
. . . \*\* \* \* \* . \* . . .

Bhutan-09015 RRWYRYWTSRYMAMRYGYCYKYSAGYRKRRCRGGWRRKCTTRWYWCGSAWRYASYYRAYTRK 40800  
Bhutan-09024 RRWYRYWTSRYMAMRYGYCYKYSAGYRKRRCRGGWRRKCTTRWYWCGSAWRYASYYRAYTRK 40800  
Bhutan-09027 RRWYRYWTSRYMAMRYGYCYKYSAGYRKRRCRGGWRRKCTTRWYWCGSAWRYASYYRAYTRK 40800  
Bhutan-09030 RRWYATYWTSRYMAMRYGYCYKYSAGYRKRRCRGGWRRKCTTRWYWCGSAWRYASYYRAYTRK 40800  
Bhutan-09005 AGWYATCTWSACCCWAYARCTYKSRGYARRTAGWGAGCKWRCWYRCRARC CGCYRG 40800  
Indonesia-88035 AGWYATTTWGACCCWAYARCTYKSRGYARRTAGWGAGCKWRCWYRCRARC CGCYRG 40800  
Indonesia-88045 AGWYATTTWGACCCWAYARCTYKSRGYARRTAGWGAGCKWRCWYRCRARC CGCYRG 40800  
Indonesia-88065 AGWYATCTWSACCCWAYARCTYKSRGYARRTAGWGAGCKWRCWYRCRARC CGCYRG 40800

\*\* . \* .. \* :\* \* . \* . .. \*\* . \*

Bhutan-09015 TCSCAAGWAARCRACYSYAMKMYGYTTTRGGGGAAGAKRCRGYAKCKRYRRAKYRYRY 40860

Bhutan-09024 TCSCRAGWAARCRACYSYAMKMYGYTTTRGGGGAAGAKRCRGYAKCKRYRRAKYRYRY 40860

Bhutan-09027 TCSYAAGWAARCRACYSYAMKMYGYTTTRGGGGAAGAKRCRGYAKCKRYRRAKYRYRY 40860

Bhutan-09030 TCSYAAGWAARCRACYSYAMKMYGYTTTRGGGGAAGAKRCRGYAKCKRYRRAKYRYRY 40860

Bhutan-09005 GWCCAMKTRMRMRGMMTGCTWCGMYRYYWARRRRWRRGKRCRRCRITYTACTAGTGTGCGCC 40860

Indonesia-88035 GTCCAMKTAACAGACTGTACTGCTGTTTAGGGRWARGKRSRRCRITYTACTAGTGTGCGCC 40860

Indonesia-88045 GTCCAMKTAACAGACTGTACTGCTGTTTAGGGRWARGKRSRRCRITYTACTAGTGTGCGCC 40860

Indonesia-88065 GWCCAMKTRMRMRGMMTGCTWCGMYRYYWARRRRWRRGKRCRRCRITYTACTAGTGTGCGCC 40860

. \*\*.\* . . :

Bhutan-09015 KWRKGYRASGRRWGAAYYYMRWKKWAGRRYRYCARCATGTRCRCAWCCCTKAGKCTKR 40920

Bhutan-09024 KWRKGYRASGRRWGAAYYYMRWKKWAGRRYRYCARCATGTRCRCAWCCCTKAGKCTKR 40920

Bhutan-09027 KWRKGYRASGAGWGAAYYYMRWKKWAGRRYRYCARCATGTRSRCAWCCCTKAGKCTKR 40920

Bhutan-09030 KWRKGYRASGRRWGAAYYYMRWKKWAGRRYRYCARCATGTRCRCAWCCCTKAGKCTKR 40920

Bhutan-09005 KTGGRWCGAGRRRYRMTYYMRWKWRRAACATTTAYWYGYRGGTRWSYCGRRTMSWKR 40920

Indonesia-88035 TAAGRWCAGRRRYRMTYYAAWKATRAACATTTAYWYKYRGGTRWSYCGRRTMSWKR 40920

Indonesia-88045 TAAGRWCAGRRRYRMTYYAAWKATRAACATTTAYWYKYRGGTRWSYCGRRTMSWKR 40920

Indonesia-88065 TTGGRWCGAGRRRYRMTYYMRWKWRRAACATTTAYWYGYRGGTRWSYCGRRTMSWKR 40920

. .. : \*\* \*\* : \* \* . . \*\*

Bhutan-09015 YMGAGRMGRYSGRRRYYGTMRGTSATYRTMARCKAYCGYWRKCSAGKKTGTWYWTMRKSG 40980

Bhutan-09024 YMGAGRMGRYSGRRRYYGTMRGTSATYRTMARCKAYCGYWRKCSAGKKTGTWYWTMRKSG 40980

Bhutan-09027 YMGAGRMGRYSGRRRYYGTMRGTSATYRTMARCKAYCGYWRKCSAGKKTGTWYWTMRKSG 40980

Bhutan-09030 YMGAGRMGRYSGRRRYYGTMRGTSATYRTMARCKAYCGYWRKCSAGKKTGTWYWTMRKSG 40980

Bhutan-09005 YMRKRRAAKAYSARAGTCRWMRAYSWCYAYARRSTMCYSTWGKYSMRGGKTAYWYAGTGR 40980

Indonesia-88035 YMRKRRAAKAYSARAGTCRWMRAYSWCYAYARRSTMCYSTWGKYSMRGGKTAYWYAGTGA 40980

Indonesia-88045 YMRKRRAAKAYSARAGTCRWMRAYSWCYAYARRSTMCYSTWGKYSMRGGKTAYWYAGTGA 40980

Indonesia-88065 YMRKAGAAKAYSARAGTCRWMRAYSWCYAYARRSTMCYSTWGKYSMRGGKTAYWYAGTGA 40980

\*\* \*\*.\* \*\*.\* \* \* \*.. . \* \* \* . : \*\* ..

Bhutan-09015 YCTYYWYYMRARYRGYAAACKTMSTRKMACSSGCTTYRYYRWWYATMARYCTYRYYY 41040

Bhutan-09024 YCTYYWYYMRARYRGYAAACKTMSTRKMACSSGCTTYRYYRWWYATMARYCTYRYYY 41040

Bhutan-09027 YCTYYWYYMRARYRGYAAACKTMSTRKMACSSGCTTYRYYRWWYATMARYCTYRYYY 41040

Bhutan-09030 YCTYYWYYMRARYRGYAAACKTMSTRKMACSSGCTTYRYYRWWYATMARYCTYRYYY 41040

Bhutan-09005 CTACCTTTAAWGYGRCCCRGYKYAGCATACTSSAGWYGGYCAATYRYAGTMYTAYYTS 41040

Indonesia-88035 CTACCTTTAAWGYGRCCCRGYKYAGCATACTSSAGWYGGYCAATYRYAGTMYTAYYTS 41040

Indonesia-88045 CTACCTTTAAWGYGRCCCRGYKYAGYATACTSSAGTYGGYCAATYRYAGTMYTAYYTS 41040

Indonesia-88065 CTACCTTTAAWGYGRCCCRGYKYAGYATACTSSAGTYGGYCAATYRYAGTMYTAYYTS 41040

: \* . . \* . . \*\* . \* \* \* \*\* \*

Bhutan-09015 SRGMYMTTCKKYTGTYMYATCAWRGTRCRASMGWAGCMYRRKRYMRKYMSRKYRWGYAKY 41100

Bhutan-09024 CGGMYMTTCKKYTGTYMYATYAWRGTRCRASMGWAGCMYRRKRYMRKYMSRKYRWGYAKY 41100

Bhutan-09027 SRGMYMTTCKKYTGTYMYATYAWRGTRCRASMGWAGCMYRRKRYMRKYMSRKYRWGYAKY 41100

Bhutan-09030 SRGMYMTTCKKYTGTYMYATYAWRGTRCRASMGWAGCMYRRKRYMRKYMSRKYRWGYAKY 41100

Bhutan-09005 SGRMYMGCATTTARYTMCWWTTRAGKWGGARCCSARATCYRRKAYMRKTMCGKGTGWRTWGM 41100

Indonesia-88035 SGRMYMGCATTTARYTMCWWTTRAGKWGGARCCSARATCYRRKAYMRKTMCGKGTGWRTWGM 41100

Indonesia-88045 SGRMYMGCATTTARYTMCWWTTRAGKWGGARCCSARATCYRRKAYMRKTMCGKGTGWRTWGM 41100

Indonesia-88065 SGRMYMGCATTTARYTMCWWTTRAGKWGGARCCSARATCYRRKAYMRKTMCGKGTGWRTWGM 41100

. \*\*\* :.. : \* \* . . . \*\* . \*\*\*\* \* . \* \*

Bhutan-09015 RKYYACGYWSYSACTRRKTCWATAGGWYKTWYGCMGYWTWYRMRCGRSRGMKYRACAGTM 41160

Bhutan-09024 RGCYACGYWSYSACTRRKTCWATAGGWYKTWYGCMGYWTWYRMRCGRSRGMKYRACAGTM 41160

|                 |                                                               |       |
|-----------------|---------------------------------------------------------------|-------|
| Bhutan-09027    | RGCYACGYWSYSACTRRKTCWATAGGWYKTYWYGCWGYWTWYRMRCGRSRGMKYRACAGTM | 41160 |
| Bhutan-09030    | RKYYACGYWSYSACTRRKTCWATAGGWYKTYWYGCWGYWTWYRMRCGRSRGMKYRACAGTM | 41160 |
| Bhutan-09005    | RGCYGSRCTCTGGACRGTWYRWYMRKTYTKATASARCWYATGCRYRGCRCCKYAWTTRKM  | 41160 |
| Indonesia-88035 | RGCYGGACTCTGGACRGTWYRAYMRKTYTKATRSACWYATGCRYRGCRCCKYAWTTRKM   | 41160 |
| Indonesia-88045 | RGCYGSRCTCTGGACRGTWYRAYMRKTYTKATRSACWYATGCRYRGCRCCKYAWTTRKM   | 41160 |
| Indonesia-88065 | RGCYGGACTCTGGACRGTWYRAYMRKTYTKATASACWYATGCRYRGCRCCKYAWTTRKM   | 41160 |
|                 | * * . . . . * . * . . * * * * . * ** : . *                    |       |
| Bhutan-09015    | ATCMGYCRYWRWRYRMCYKSGKTAAYYYAAYRTGRGYAWTRKAYWYYCTAGMYGMRTYY   | 41220 |
| Bhutan-09024    | ATCMGYCRYWRWRYRMCYKSGKTAAYYYAAYRTGRGYAWTRKAYWYYCTAGMYGMRTYY   | 41220 |
| Bhutan-09027    | ATCMGYCRYWRWRYRMCYKSGKTAAYYYAAYRTGRGYAWTRKAYWYYCTAGMYGMRTYY   | 41220 |
| Bhutan-09030    | ATCMGYCRYWRWRYRMCYKSGKTAAYYYAAYRTGRGYAWTRKAYWYYCTAGMYGMRTYY   | 41220 |
| Bhutan-09005    | RYACKCSRTARTRCGYTCGRTYARWYSCRBYAGRRKRCWWRKRCWCYYYRRAACAAGYIC  | 41220 |
| Indonesia-88035 | RYACKCSRTARTRCGYTCGRTYARWYSCRBYAGRRKRCWWRKRCWCYYYRRAACAAGYIC  | 41220 |
| Indonesia-88045 | RYACKCSRTARTACGYTCGRTYARWYSCRACAGRRKRCWWRKRCWCYYYRRAACAAGYIC  | 41220 |
| Indonesia-88065 | RYACKCSRTARTRCGYTCGRTYARWYSCRBYAGRRKRCWWRKRCWCYYYRRAACAAGYIC  | 41220 |
|                 | . * * . . . * * * * * . *                                     |       |
| Bhutan-09015    | YTKMRTTYRYYYCYGCWSGGCRATKGGGGGAGAATCGGCMKYATCMAGCTRKYAAYCGK   | 41280 |
| Bhutan-09024    | YTKMRTTYRYYYCYGCWSGGCGATKGGGGGAGAATCGGCMKYATCMAGCTRKYAAYCGK   | 41280 |
| Bhutan-09027    | YTKMRTTYRYYYCYGCWSGGCGRTGGGGGGAGAATCGGCMKYATCMAGCTRKYAAYCGK   | 41280 |
| Bhutan-09030    | YTKMRTTYRYYYCYGCWSGGCGRTKGRGGGAGAATCGGCMKYATCMAGCTRKYAAYCGK   | 41280 |
| Bhutan-09005    | CCGCACYACYYCYCRYASKRYGAYGSRRRSARMRTYRRYMCTCRYMWRMWGKYAAYYKT   | 41280 |
| Indonesia-88035 | CCGCACYACYYCYGYWSGGCGAYGGRGGGAGAAYCGGCCCTCATYAAGCTGTCAAYCGT   | 41280 |
| Indonesia-88045 | CCGCACYACYYCYGYASGGCGAYGGRGGGAGAAYCGGCCCTCATYAAGCTGTCTMAYCGT  | 41280 |
| Indonesia-88065 | CCGCACYACYYCYGYASKRYGAYGSRRRSARMRTYRRYMCTCRYMWRMWGKYAAYYKT    | 41280 |
|                 | * ** * . . . . * . *                                          |       |
| Bhutan-09015    | YYGRRATKYRRRWGRACATCAWYRCATGGWKCTTCYRYRCCAACWYGAGGRYRGYMRW    | 41340 |
| Bhutan-09024    | YYGRRATKYRRRWGRACATCAWYRCATGGWKCTTCYRYRCCAACWYGAGGRYRGYMRW    | 41340 |
| Bhutan-09027    | YYGRRATKYRRRWGRACATCAWYRCATGGWKCTTCYRYRCCAACWYGAGGRYRGYMRW    | 41340 |
| Bhutan-09030    | YYGRRATKYRRRWGRACATCAWYRCATGGWKCTTCYRYRCCAACWYGAGGRYRGYMRW    | 41340 |
| Bhutan-09005    | YCRAMKGCARRWAARMRKSTTCGMTWSMWGYTWCYCCRYAAYGRYTCRWRATAKAGA     | 41340 |
| Indonesia-88035 | CCGGAATGCAGATGAACATSTTCGMTWSMWGYTWCYCCRYAAYGRYTCRWRATAKARA    | 41340 |
| Indonesia-88045 | CCGGAATGCAGATGAACATSTTCGMTWSMWGYTWCYCCRYAAYGRYTCRWRATAKARA    | 41340 |
| Indonesia-88065 | YCRACGGCARRWAARMRKSTTCGMTWSMWGYTWCYCCRYAAYGRYTCRWRATAKAGA     | 41340 |
|                 | . . . : . * ** .                                              |       |
| Bhutan-09015    | KRRYAYRAKWGRTYAYTRRRYRCWMTYWRSRAYMRWGCRATTCRCRTYMARRSCTTGRGC  | 41400 |
| Bhutan-09024    | KRRYAYRAKWGRTYAYTRRRYRCWMTYWRSRACARWGCRATTCRCRTYMARRSCTTGRGC  | 41400 |
| Bhutan-09027    | KRRYAYRAKWGRTYAYTRRRYRCWMTYWRSRAYMRWGCAATTCRCRTYMARRSCTTGRGC  | 41400 |
| Bhutan-09030    | KRRYAYRAKWGRTYAYTRRRYRCWMTYWRSRACARWGCAATTCRCRTYMARRSCTTGRGC  | 41400 |
| Bhutan-09005    | GGRYRTGGGWRGCTRYGGGGCGYACMYARGRCCAGTAYGCCCYAMGWYMCAACTYKARY   | 41400 |
| Indonesia-88035 | GGRYRTGGGWRGCTRYGGGGCGYACMYARGRCCAGTAYGCCCYAMGWYMCAACTYKARY   | 41400 |
| Indonesia-88045 | GGRYRTGGGWRGCTRYGGGGCGYACMYARGRCCAGTAYGCCCYAMGWYMCAACTYKARY   | 41400 |
| Indonesia-88065 | GGRYRTGGGWRGCTRYGGGGCGYACMYARGRCCAGTAYGCCCYAMGWYMCAACTYKARY   | 41400 |
|                 | ** . * * ** * . * . ** .                                      |       |
| Bhutan-09015    | CARSKMTAYSRYCTWTGRRCYRTRRRCGRTWCYRGRCCARSYSGRCTCTCRSAYCSWYK   | 41460 |
| Bhutan-09024    | CARSKMTAYSRYCTWTGRRCYRTRRRCGRTWCYRGRCCARSYSGRCTCTCRSAYCSWYK   | 41460 |
| Bhutan-09027    | CARSKMTAYSRYCTWTGRRCYRTRRRCGRTWCYRGRCCARSYSGRCTCTCRSAYCSWYK   | 41460 |
| Bhutan-09030    | CARSKMTAYSRYCTWTGRRCYRTRRRCGRTWCYRGRCCARSYSGRCTCTCRSAYCSWYK   | 41460 |
| Bhutan-09005    | SRGGTATACGGCCTAWAGGCTACRRRGAGGTYCACRMSCTRCCCGYKSYRSGCSGWTK    | 41460 |
| Indonesia-88035 | SRGGTAYRCGGCMYAWAGGTTACRRRGAGGTYCACRMSYTRCCCGYKSYRSGCSGWTK    | 41460 |

Indonesia-88045 SRGGTAYRCGGCMYAWAGGTTACRRRGAGGTYCACRMSYTRCCCRGYKSYRSGCSGWTK 41460  
Indonesia-88065 SRGGTAYRCGGCMTAWAGGCTACRRRGAGGTYCACRMSCTRCCCGGYKSYRSGCSGWTK 41460  
. . . . . \*\*\* . \* . : \* . . . . \*\* . . \* \*

Bhutan-09015 TYYRYKYRAKAACAGWRRTCGKKAMGWMYGRCTMRCACRSMRRYAWTASGTAARYCATGR 41520  
Bhutan-09024 TYYRYKYRAKAACAGWRRTCGKKAMGWMYGRCTMRCACRSMRRYAWTASGTAARYCATGR 41520  
Bhutan-09027 TYYRYKYRAKAACAGWRRTCGKKAMGWMYGRCTMRCACRSMRRYAWTASGTAARYCATGR 41520  
Bhutan-09030 TYYRYKYRAKAACAGWRRTCGKKAMGWMYGRCTMRCACRSMRRYAWTASGTAARYCATGR 41520  
Bhutan-09005 KCCRCKSARGGGTMSWRGCMRKKMAAAAYARGYMAVRTASCRRTWAWRGRKRGYTYGYRR 41520  
Indonesia-88035 KCCRCKSARGGGTMSWRGCMRKKMAAAAYARGYMAVRTASCRRTWAWRGRKRGYTYGYRR 41520  
Indonesia-88045 KCCRCKSARGGGTMSWRGCMRKKMAAAAYARGYMAVRTASCRRTWAWRGRKRGYTYGYRR 41520  
Indonesia-88065 KCCRCKSARGGGTMSWRGCMRKKMAAAAYARGYMAVRTASCRRTWAWRGRKRGYTYGYRR 41520  
. \* \* . . . \*\* \*\* . \* . \* \* \* \* . . . \* . \*

Bhutan-09015 MGCAATSTCYTRARWARCYATYYMCYAKCARYMWRGRKGMGMAYTYTYGYAACGGCCAYR 41580  
Bhutan-09024 MGCAATSTCYTRARWARCYATYYMCYAKCARYMWRGRKGMGMAYTYTYGYAACGGCCAYR 41580  
Bhutan-09027 MGCAATSTCYTRARWARCYATYYMCYAKCARYMWRGRKGMGMAYTYTYGYAACGGCCAYR 41580  
Bhutan-09030 MGCAATSTCYTRARWARCYATYYMCYAKCARYMWRGRKGMGMAYTYTYGYAACGGCCAYR 41580  
Bhutan-09005 AAYGYSTSCYYGRRARAYTGTYTCATYRTMMRYAAAARKRACRMTCTGCRYRGYRRAARCA 41580  
Indonesia-88035 AAYGYSTSCYYGRRARAYTGTYTCATYRTMMRYAAAARKRACRMTCTGCRYRGYRRAARCA 41580  
Indonesia-88045 AAYGYSTSCYYGRRARAYTGTYTCATYRTMMRYAAAARKRACRMTCTGCRYRGYRRAARCA 41580  
Indonesia-88065 AAYGYSTSCYYGRRARAYTGTYTCATYRTMMRYAAAARKRACRMTCTGCRYRGYRRAARCA 41580  
. . \* . . . \*\* \*\* . \* . \* \* \* \* . . . \* . \*

Bhutan-09015 RMCCRCWKYRTSWGGYMRCKKCARYYRWKCRRRMYGMYMAAAYCMCRCTTYRWAWTYWAY 41640  
Bhutan-09024 RMCCRCWKYRTSWGGYMRCKKCARYYRWKCRRRMYGMYMAAAYCMCRCTTYRWAWTYWAY 41640  
Bhutan-09027 RMCCRCWKYRTSWGGYMRCKKCARYYRWKCRRRMYGMYMAAAYCMCRCTTYRWAWTYWAY 41640  
Bhutan-09030 RMCCRCWKYRTSWGGYMRCKKCARYYRWKCRRRMYGMYMAAAYCMCRCTTYRWAWTYWAY 41640  
Bhutan-09005 GMMMAASAKMRWGTRRCCGYGKYATCAAKMRGRCYGCCMMRMCYRXYCCAATAWTWMY 41640  
Indonesia-88035 GMCAASAKMATGTGGCCGYGKYATCAAKMRGRCYGCCMMRMCYRXYCCAATAWTWMY 41640  
Indonesia-88045 GMCAASAKMATGTGGCCGYGKYATCAAKMRGRCYGCCMMRMCYRXYCCAATAWTWMY 41640  
Indonesia-88065 GMMMAASAKMRWGTRRCCGYGKYATCAAKMRGRCYGCCMMRMCYRXYCCAATAWTWMY 41640  
\* . . \* . . . \* . \* \* \* \* \* \* \* : \* \* \*

Bhutan-09015 YRYTCRRCTGKRGYAWTMYRRCMRRSCYRWRWAYKAYMYTGMMYWTTYTYTRYWAGRYG 41700  
Bhutan-09024 YRYTCRRCTGKRGYAWTMYRRCMRRSCYRWRWCGAYMYTGMMYWTTYTYTRYWAGRYG 41700  
Bhutan-09027 YRYTCRRCTGKRGYAWTMYRRCMRRSCYRWRWCGAYMYTGMMYWTTYTYTRYWAGRYG 41700  
Bhutan-09030 YRYTCRRCTGKRGYAWTMYRRCMRRSCYRWRWCGAYMYTGMMYWTTYTYTRYWAGRYG 41700  
Bhutan-09005 YRYWYAGMKRTRATRTWATTAYAAGCYCGTAWWYGMTMYSAATTWWTYYARTCWWRAYA 41700  
Indonesia-88035 YRYWYAGMKRTRATRTWATTAYAAGCYCGTAWWYGMTMYSAATTWWTYYARTCWWRAYA 41700  
Indonesia-88045 YRYWYAGMKRTRATRTWATTAYAAGCYCGTAWWYGMTMYSAATTWWTYYARTCWWRAYA 41700  
Indonesia-88065 YRYWYAGMKRTRATRTWATTAYAAGCYCGTAWWYGMTMYSAATTWWTYYARTCWWRAYA 41700  
\*\*\* . . \* . . . \* \* \* \* \* \* \* : \* \* \*

Bhutan-09015 YRGYCTCGGYMWGKMSWWCCYKGATYGTWCKKYTGTKYTYSCTGRCWKCYRTAGMCTTGS 41760  
Bhutan-09024 YRGYCTCGGYMWGKMSWWCCYKGATYGTWCKKYTGTKYTYSCTGRCWKCYRTAGMCTTGS 41760  
Bhutan-09027 YRGYCTCGGYMWGKMSWWCCYKGATYGTWCKKYTGTKYTYSCTGRCWKCYRTAGMCTTGS 41760  
Bhutan-09030 YRGYCTCGGYMWGKMSWWCCYKGATYGTWCKKYTGTKYTYSCTGRCWKCYRTAGMCTTGS 41760  
Bhutan-09005 CARTYKYRRYCAAGMKAWTTCRKYRCRGASYKYTKYKCYCMCAASTTYTYGYWRASKWSG 41760  
Indonesia-88035 CARTYKYRRYCAAGMKAWTTCRKYRCRGASYKYTKYKCYCMCAASTTYTYGYWRASKWSG 41760  
Indonesia-88045 CARTYKYRRYCAAGMKAWTTCRKYRCRGASYKYTKYKCYCMCAASTTYTYGYWRASKWSG 41760  
Indonesia-88065 CAGTYKYRRYCAAGMKAWTTCRKYRCRGASYKYTKYKCYCMCAASTTYTYGYWRASKWSG 41760  
. \* . \* . \* . . \*\* \* \* . . . . . . . . . .

Bhutan-09015 RARGCTACKTYRRCRYRYAWGMSTWCRCYCCWRMRRYKCRGSACGCAGTGASRYKYRTCT 41820  
 Bhutan-09024 RARGCTACKTYRRCRYRYAWGMSTWCRCYCCWRMRRYKCRGSACGCAGTGASRYKYRTCT 41820  
 Bhutan-09027 RARGCTACKTYRRCRYRYAWGMSTWCRCYCCWRMRRYKCRGSACGCAGTGASRYKYRTCT 41820  
 Bhutan-09030 RARGCTACKTYRRCRYRYAWGMSTWCRCYCCWRMRRYKCRGSACGCAGTGASRYKYRTCT 41820  
 Bhutan-09005 WCRKSYWMTKTTRYGTATRWKMGWYGYYYAAMGRYKMAKGRMRYWRWKCSACTCGCTK 41820  
 Indonesia-88035 TCRKCYWMTKTTRYGTATRWKMGWYGYYYAAMGRYKMAKGRMGCAGTGCSACTCGCTK 41820  
 Indonesia-88045 TCRKCYWMTKTTRYGTATRWKMGWYGYYYAAMGRYKMAKGRMGCAGTGCSACTCGCTK 41820  
 Indonesia-88065 WCRKSYWMTKTTRYGTATRWKMGWYGYYYAAMGRYKMAKGRMRYWRWKCSACTCGCTK 41820  
 . \* . . . \* \* \* . \* \* \* . . . \* . . .

Bhutan-09015 TACKMRARRCRRWCWYMRGARTKCYMTRMYARTKRMKWYTCCTTRKGAKYTCTATGRSCA 41880  
 Bhutan-09024 TACKMRWRRCRRWCWYMRGARTKCYMTRMYARTKRMKWYTCCTTRKGAKYTCTATGRSCA 41880  
 Bhutan-09027 TACKMRWRRCRRWCWYMRGARTKCYMTRMYARTKRMKWYTCCTTRKGAKYTCTATGRSCA 41880  
 Bhutan-09030 TACKMRWRRCRRWCWYMRGARTKCYMTRMYARTKRMKWYTCCTTRKGAKYTCTATGRSCA 41880  
 Bhutan-09005 YGTTARAAGYARWYWCGRRGYTYTCYGACRRCKGAKWYCCTTWGTSRKCCCTYRCRGGYR 41880  
 Indonesia-88035 YGTTARAAGYARWYWCGRRGYTYTCYGACRRCKGAKWYCCTTWGTSRKCCCTYRCRGGYR 41880  
 Indonesia-88045 YGTTARAAGYARWYWCGRRGYTYTCYGACRRCKGAKWYCCTTWGTSRKCCCTYRCRGGYR 41880  
 Indonesia-88065 YGTTARAAGYARWYWCGRRGYTYTCYGACRRCKGAKWYCCTTWGTSRKCCCTYRCRGGYR 41880  
 . . \* \* \* \* . \* \* \* \* . . \* . . .

Bhutan-09015 RACYCAGGGTKGYAACGTYMRRYAGRKTRYWCACWYRYRKYCTYRYAYAWYWTSAMT 41940  
 Bhutan-09024 RACYCAGGGTKGYAACGTYMRRYAGRKTRYWCACWYRYRKYCTYRYAYAWYWTSAMT 41940  
 Bhutan-09027 RACYCAGGGTKGYAACGTYMRRYAGRKTRYWCACWYRYRKYCTYRYAYAWYWTSAMT 41940  
 Bhutan-09030 RACYCAGGGTKGYAMCGTYMRRYAGRKTRYWCACWYRYRKYCTYRYAYAWYWTSAMT 41940  
 Bhutan-09005 AWYARWYRKYKATRAGAYYAARCTGRRKCAWYACAYYGGCAYYGTWTCWTACGRMY 41940  
 Indonesia-88035 AWYARWYRKYKATRAGAYYAARCTGRRKCAWYACAYYGGCAYYGTWTCWTACGRMY 41940  
 Indonesia-88045 AWYARWYRKYKATRAGAYYAARCTGRRKCAWYACAYYGGCAYYGTWTCWTACGRMY 41940  
 Indonesia-88065 AWYARWYRKYKATRAGAYYAARCTGRRKCAWYACAYYGGCAYYGTWTCWTACGRMY 41940  
 \* . \* . \* \* . \* \* \* \* \* . \* . \* . \*

Bhutan-09015 GACMYAWCTWCTYMTCRWYSTWTKWRKRAKRWYYTAWTKYMTCSYCMTRWTWCCYKG 42000  
 Bhutan-09024 GACMYAWCTWCTYMTCRWYSTWTKWRKRAKRWYYTAWTKYMTCSYCMTRWTWCCYKG 42000  
 Bhutan-09027 GACMYAWCTWCTYMTCRWYSTWTKWRKRAKRWYYTAWTKYMTCSYCMTRWTWCCYKG 42000  
 Bhutan-09030 GACMYAWCTWCTYMTCRWYSTWTKWRKRAKRWYYTAWTKYMTCSYCMTRWTWCCYKG 42000  
 Bhutan-09005 KCYACRAYYWAYYTCGCRTRTSYACKWRKGRKTGTTTCGTYKYACCYCTAAGRWKAYMTGA 42000  
 Indonesia-88035 KCYACRAYYWAYYTCGCRTRTSYACKWRKGRKTGTTTCGTYKYACCYCTAAGRWKAYMTGA 42000  
 Indonesia-88045 KCYACRAYYWAYYTCGCRTRTSYACKWRKGRKTGTTTCGTYKYACCYCTAAGRWKAYMTGA 42000  
 Indonesia-88065 KCYACRAYYWAYYTCGCRTRTSYACKWRKGRKTGTTTCGTYKYACCYCTAAGRWKAYMTGA 42000  
 . \* . \* \* \* \* \* . \* \* . . \* . . \*

Bhutan-09015 TGGCRATTWCRRRKTCYAGGSCWMTTRYWTGGGYMCRCCYMCCWSTMRYRSTRYSYSTR 42060  
 Bhutan-09024 TGGCRATTWCRRRKTCYAGGSCWMTTRYWTGGGCACRCCYMCCWSTMRYRSTRYSYSTR 42060  
 Bhutan-09027 TGGCRATKWRRRKTCYAGGSCWMTTRYWTGGGCACRCCYMCCWSTMRYRSTRYSYSTR 42060  
 Bhutan-09030 TGGCRATKWRRRKTCYAGGSCWMTTRYWTGGGYMCRCCYMCCWSTMRYRSTRYSYSTR 42060  
 Bhutan-09005 CSRYGWAKYYRAGKCYSCRAASSTCCCGYAYTTACAMGYGTCYCYAGYCCRWGAYYCTSWA 42060  
 Indonesia-88035 CSRYGWAKYYRAGKCYSCRAASSTCCCGTAYTTACACGCGTCYCYAGYCCRWGAYYCTSWA 42060  
 Indonesia-88045 CSRYGWAKYYRAGKCYSCRAASSTCCCGTATTTACACGCGTCYCYAGYCCRWGAYYCTSWA 42060  
 Indonesia-88065 CSRYGWAKYYRAGKCYSCRAASSTCCCGYAYTTACAMGYGTCYCYAGYCCRWGAYYCTSWA 42060  
 . . : : \* \* . . \* . . . \*

Bhutan-09015 YWRYRARTAKAWRTTRCYYYRYAWRYRRCRRRGCYCYYRYGRMTTRYRKRWRKYYT 42120  
 Bhutan-09024 YWRYRARTAKAWRTTRCYYYRYAWRYRRCRRRGCYCYYRYGRCTTRYRKRWRKYYT 42120  
 Bhutan-09027 YWRYRARTAKAWRTTRCYYYRYAWRYRRCRRRGCYCYYRYGRCTTRTGKRWRKYYT 42120  
 Bhutan-09030 YWRYRARTAKAWRTTRCYYYRYAWRYRRCRRRGCYCYYRYGRMTTRYRKRWRKYYT 42120

|                 |                                                               |       |
|-----------------|---------------------------------------------------------------|-------|
| Bhutan-09005    | CTACGTATGYRKRRTGKYRSCYTYTGYRWGCGRYGRARYSCTRRCKGCWYRCATRWRKTTK | 42120 |
| Indonesia-88035 | CTACGTATGYRTATGGTACCTYTGATGCGRYGRAGYSTTRRCKGCTYRCATRWRKTTG    | 42120 |
| Indonesia-88045 | CTACGTATGYRTATGGTACCTYTGATGCGRYGRAGYSTTRRCKGCWYRCATRWRKTTG    | 42120 |
| Indonesia-88065 | CTACGTATGYRKRRTGKYRSCYTYTGYRWGCGRYGRARYSCTRRCKGCTYRCATRWRKTTK | 42120 |
|                 | : . * * * * . ** *                                            |       |
| Bhutan-09015    | TGYCGRMCCAMKWSRCAGGCAYSMAYMYSTRAAYRGTRCYRAGTARKAGACWTCRGARRG  | 42180 |
| Bhutan-09024    | TGYCGRMCCAMKWSRCAGGCAYSMAYMYSTRAAYRGTRCYRAGTARKAGACWTCRGARRG  | 42180 |
| Bhutan-09027    | TGYCGRMCCAMKWSRCAGGCAYSMAYMYSTRAAYRGTRCYRAGTARKAGACWTCRGARRG  | 42180 |
| Bhutan-09030    | TGYCGRMCCAMKWSRCAGGCAYSMAYMYSTRAAYRGTRCYRAGTARKAGACWTCRGARRG  | 42180 |
| Bhutan-09005    | WRTYRRCGMMKACAYRSCGWYSAWTAYGGGMYGTCRMYKRCYAGGGAMYAKMASWRAS    | 42180 |
| Indonesia-88035 | WRTYRRCGSAMKACRYRSCGWYSAWTAYGGGMYGTCRMYKRCYRGGGAACAKMASWRAS   | 42180 |
| Indonesia-88045 | WRTYRRCGSAMKACRYRSCGWYSAWTAYGGGMYGTCRMYKRCYRGGGAACAKMASWRAS   | 42180 |
| Indonesia-88065 | WRTYRRCGMMKACRYRSCGWYSAWTAYGGGMYGTCRMYKRCYRGGGAMYAKMASWRAS    | 42180 |
|                 | * ** . . ** * . * * : . . . * .                               |       |
| Bhutan-09015    | KRYGKCGGATTYCRGRSGYGGTARWWTKTAAGRCACASKTCYGTCKGAATRYYGAAARAA  | 42240 |
| Bhutan-09024    | KRYGKCGGATTMCRGRSGYGGTARWWTKTAAGRCACASKTCYGTCKGAATRYYGAAARAA  | 42240 |
| Bhutan-09027    | KRYGKCGGATTYCRGRSGYGGTARWWTKTAAGRCACASKTCYGTCKGAATRYYGAAARAA  | 42240 |
| Bhutan-09030    | KRYGKCGGATTCCRGRSGYGGTARWWTKTAAGRCACASKTCYGTCKGAATRYYGAAARAA  | 42240 |
| Bhutan-09005    | TGCSYKSRKYKCCRRRCAYRRKMATTYGTAAGRMTSGSTKCCGTSKAATWACTKRRRRWW  | 42240 |
| Indonesia-88035 | TGCSYKSRYKCCRRRCAYRRKMATTYGTAAGRMTSGSTKCCGTSKAATWACTKRRRRWW   | 42240 |
| Indonesia-88045 | TGCSYKSRYKCCRRRCAYRRKMATTYGTAAGRMTSGSTKCCGTSKAATWACTKRRRRWW   | 42240 |
| Indonesia-88065 | TGCSYKSRYKCCRRRCAYRRKMATTYGTAAGRMTSGSTKCCGTSKAATWACTKRRRRWW   | 42240 |
|                 | . . . * ** . : * ** . * . *                                   |       |
| Bhutan-09015    | RRRMYRWTASAYSRYYTRCRACSWYMGKKCTYGGRYRSAGWATYRTGRMMACAAARRRY   | 42300 |
| Bhutan-09024    | RRRMYRWTASAYSRYYTRCRACSWYMGKKCTYGGRYRSAGWATYRTGRMMACAAARRRY   | 42300 |
| Bhutan-09027    | RRRMYRWTASAYSRYYTRCRACSWYMGKKCTYGGRYRSAGWATYRTGRMMACAAARRRY   | 42300 |
| Bhutan-09030    | RRRMYRWTASAYSRYYTRCRACSWYMGKKCTYGGRYRSAGWATYRTGRMMACAAARRRY   | 42300 |
| Bhutan-09005    | AAAMYRWYRCRYGGYCAAYARYSWYCKTYYKTRRGCTASWGARYCAGRACAWTRWGGRRY  | 42300 |
| Indonesia-88035 | AAACCGTYACACGGYCAAYAGCGWYCGTYYKTRRGCTAGAGARTCAGRACAWTAAGGRRY  | 42300 |
| Indonesia-88045 | AAACCGTYACACGGYCAAYARCGWYCGTYYKTRRGCTAGAGARTCAGRACAWTAAGGRRY  | 42300 |
| Indonesia-88065 | AAAMYRWYRCRYGGYCAAYARYSWYCKTYYKTRRGCTASWGARYCAGRACAWTRWGGRRY  | 42300 |
|                 | . . * : . ** . . . . ***                                      |       |
| Bhutan-09015    | WARRMYWYRMGTYWYRMGCGTTACAWGYMRYRYCGRWYTYCYCSCKYCYSYWRYCGRR    | 42360 |
| Bhutan-09024    | WARRMYWYRMGTYWYRMGCGTTACAWGYMRYRYCGRWYTYCYCSCKYCYSYWRYCGRR    | 42360 |
| Bhutan-09027    | WARRMYWYRMGTYWYRMGCGTTACAWGYMRYRYCGRWYTYCYCSCKYCYSYWRYCGRR    | 42360 |
| Bhutan-09030    | WARRMYWYRMGTYWYRMGCGTTACAWGYMRYRYCGRWYTYCYCSCKYCYSYWRYCGRR    | 42360 |
| Bhutan-09005    | WRGAWTAYRAAKCAAYAAKSCCGMSRARYMRCRCKTGATYYCYGTTCYTGTWRTYKAGY   | 42360 |
| Indonesia-88035 | WRGAWTAYRAAKCAAYAAKSCCGACAAGCCGCRCKTGATYYCYGTTCYTGTWRTYKAGY   | 42360 |
| Indonesia-88045 | WRGAWTAYRAAKCAAYAAKSCCGACAAGCCGCRCKTGATYYCYGTTCYTGTWRTYKAGY   | 42360 |
| Indonesia-88065 | WRGAWTAYRAAKCAAYAAKSCCGMSRARYMRCRCKTGATYYCYGTTCYTGTWRTYKAGY   | 42360 |
|                 | * ** . . * . . * . . . **                                     |       |
| Bhutan-09015    | CACAMKWGRSYCRYCYGKRGTAKTGAACYSYMAGAGACTGMCATGGCCGAARYMRCTWR   | 42420 |
| Bhutan-09024    | CACAMKWGRSYCRYCYGKRGTAKTGAACYSYMAGAGACTGMCATGGCCGAARYMRCTWR   | 42420 |
| Bhutan-09027    | CACAMKWGRSYCRYCYGKRGTAKTGAACYSYMAGAGACTGMCATGGCCGAARYMRCTWR   | 42420 |
| Bhutan-09030    | CACAMKWGRSYCRYCYGKRGTAKTGAACYSYMAGAGACTGMCATGGCCGAARYMRCTWR   | 42420 |
| Bhutan-09005    | YRYWMTAKGSCYATCSRYGGRKRTKMRMCSYMCRRRRSCKCTTTRRYYARRACAATYAA   | 42420 |
| Indonesia-88035 | CACAMTAKGSCCATCCGTGGRTAKTGAACCSYMCAGRSCKCTTTRGCCAARACAATYAR   | 42420 |
| Indonesia-88045 | CACAMTAKGSCCATCCGTGGRTAKTGAACCSYMCAGRSCKCTTTRGCCAARACAATYAR   | 42420 |
| Indonesia-88065 | YRYWMTAKGSCYATCSRYGGRKRTKMRMCSYMCRRRRSCKCTTTRRYYARRACAATYAA   | 42420 |











Indonesia-88065 YTYTTYCTCYTTYCTYTYTYTTCYTTTCYTYYYYCYTCYYYCTTCYTYTYCYTYCYYYYYY 960

Bhutan-09015 YYYYYYYYYYYYYYYYYYYYYYYYYYYYYYYYYYYYYYYYYYYYYYYYYYYYYYYYYYYYYYYY 1020

Bhutan-09024 YYYYYYYYYYYYYYYYYYYYYYYYYYYYYYYYYYYYYYYYYYYYYYYYYYYYYYYYYYYYYYYY 1020

Bhutan-09027 YYYYYYYYYYYYYYYYYYYYYYYYYYYYYYYYYYYYYYYYYYYYYYYYYYYYYYYYYYYYYYYY 1020

Bhutan-09030 YYYYYYYYYYYYYYYYYYYYYYYYYYYYYYYYYYYYYYYYYYYYYYYYYYYYYYYYYYYYYYYY 1020

Bhutan-09005 YYYCCTYYYTYTYYYYCYCYTYTYCYYYYTCTYCTCYCYCTYCTYTYCTCTYTYTYTY 1020

Indonesia-88035 YCTTYCTCTTYCCCTYCYCTYCTYTYTYCYTYCTCYTYCYTYCYTYCCCTTTTYTYCTTT 1020

Indonesia-88045 TYTTYCTCTTYCCCTCYCYCYCTYTYTYCTYTYCTCYTYCYTYCCCTTTTYTYCTTT 1020

Indonesia-88065 YYYCCTYYYTYTYTYTYTYTYTYTYTYTYTYTYTYTYTYTYTYTYTYTYTYTYTYTYTYTY 1020

Bhutan-09015 YYYYYYYYYYYYYYYYYYYYYYYYYYYYYYYYYYYYYYYYYYYYYYYYYYYYYYYYYYYYYYYY 1080

Bhutan-09024 YYYYYYYYYYYYYYYYYYYYYYYYYYYYYYYYYYYYYYYYYYYYYYYYYYYYYYYYYYYYYYYY 1080

Bhutan-09027 YYYYYYYYYYYYYYYYYYYYYYYYYYYYYYYYYYYYYYYYYYYYYYYYYYYYYYYYYYYYYYYY 1080

Bhutan-09030 YYYYYYYYYYYYYYYYYYYYYYYYYYYYYYYYYYYYYYYYYYYYYYYYYYYYYYYYYYYYYYYY 1080

Bhutan-09005 YCCYCTYYYTYTYTYTYTYTYTYTYTYTYTYTYTYTYTYTYTYTYTYTYTYTYTYTYTYTY 1080

Indonesia-88035 TTYTYTYTYTYTYTYTYTYTYTYTYTYTYTYTYTYTYTYTYTYTYTYTYTYTYTYTYTYTY 1080

Indonesia-88045 TTYTYTYTYTYTYTYTYTYTYTYTYTYTYTYTYTYTYTYTYTYTYTYTYTYTYTYTYTYTY 1080

Indonesia-88065 YCCYTYTYTYTYTYTYTYTYTYTYTYTYTYTYTYTYTYTYTYTYTYTYTYTYTYTYTYTYTY 1080

Bhutan-09015 YYYYYYYYYYYYYYYYYYYYYYYYYYYYYYYYYYYYYYYYYYYYYYYYYYYYYYYYYYYYYYYY 1140

Bhutan-09024 YYYYYYYYYYYYYYYYYYYYYYYYYYYYYYYYYYYYYYYYYYYYYYYYYYYYYYYYYYYYYYYY 1140

Bhutan-09027 YYYYYYYYYYYYYYYYYYYYYYYYYYYYYYYYYYYYYYYYYYYYYYYYYYYYYYYYYYYYYYYY 1140

Bhutan-09030 YYYYYYYYYYYYYYYYYYYYYYYYYYYYYYYYYYYYYYYYYYYYYYYYYYYYYYYYYYYYYYYY 1140

Bhutan-09005 TYTTYTYTYTYTYTYTYTYTYTYTYTYTYTYTYTYTYTYTYTYTYTYTYTYTYTYTYTYTY 1140

Indonesia-88035 YTYTYCCCTYTYTYTYTYTYTYTYTYTYTYTYTYTYTYTYTYTYTYTYTYTYTYTYTYTY 1140

Indonesia-88045 YTYTYCCCTYTYTYTYTYTYTYTYTYTYTYTYTYTYTYTYTYTYTYTYTYTYTYTYTYTY 1140

Indonesia-88065 TYTTYTYTYTYTYTYTYTYTYTYTYTYTYTYTYTYTYTYTYTYTYTYTYTYTYTYTYTYTY 1140

Bhutan-09015 YYYYYYYYYYYYYYYYYYYYYYYYYYYYYYYYYYYYYYYYYYYYYYYYYYYYYYYYYYYYYYYY 1200

Bhutan-09024 YYYYYYYYYYYYYYYYYYYYYYYYYYYYYYYYYYYYYYYYYYYYYYYYYYYYYYYYYYYYYYYY 1200

Bhutan-09027 YYYYYYYYYYYYYYYYYYYYYYYYYYYYYYYYYYYYYYYYYYYYYYYYYYYYYYYYYYYYYYYY 1200

Bhutan-09030 YYYYYYYYYYYYYYYYYYYYYYYYYYYYYYYYYYYYYYYYYYYYYYYYYYYYYYYYYYYYYYYY 1200

Bhutan-09005 YYYCYCYTYTYTYTYTYTYTYTYTYTYTYTYTYTYTYTYTYTYTYTYTYTYTYTYTYTY 1200

Indonesia-88035 TCCTTCYCTTTCTCCCTYTYTYTYTYTYTYTYTYTYTYTYTYTYTYTYTYTYTYTYTYTY 1200

Indonesia-88045 TCCTTCYCTTTCTCCCTYTYTYTYTYTYTYTYTYTYTYTYTYTYTYTYTYTYTYTYTYTY 1200

Indonesia-88065 YYYCYCYTYTYTYTYTYTYTYTYTYTYTYTYTYTYTYTYTYTYTYTYTYTYTYTYTYTY 1200

Bhutan-09015 YYYYYYYYYYYYYYYYYYYYYYYYYYYYYYYYYYYYYYYYYYYYYYYYYYYYYYYYYYYYYYYY 1260

Bhutan-09024 YYYYYYYYYYYYYYYYYYYYYYYYYYYYYYYYYYYYYYYYYYYYYYYYYYYYYYYYYYYYYYYY 1260

Bhutan-09027 YYYYYYYYYYYYYYYYYYYYYYYYYYYYYYYYYYYYYYYYYYYYYYYYYYYYYYYYYYYYYYYY 1260

Bhutan-09030 YYYYYYYYYYYYYYYYYYYYYYYYYYYYYYYYYYYYYYYYYYYYYYYYYYYYYYYYYYYYYYYY 1260

Bhutan-09005 CYTYTYTYTYTYTYTYTYTYTYTYTYTYTYTYTYTYTYTYTYTYTYTYTYTYTYTYTYTY 1260

Indonesia-88035 YTTYCTTCCTYCYCCCTCTTTCTTTTYTYTYTYTYTYTYTYTYTYTYTYTYTYTYTYTY 1260

Indonesia-88045 YTTYCTTCCTYCYCCCTCTTTCTTTTYTYTYTYTYTYTYTYTYTYTYTYTYTYTYTYTY 1260

Indonesia-88065 CYTYTYTYTYTYTYTYTYTYTYTYTYTYTYTYTYTYTYTYTYTYTYTYTYTYTYTYTYTY 1260

Bhutan-09015 YYYYYYYYYYYYYYKKKKKKKKKKKKKKKKKKKKKKKKKKKKKKKKKKKKKKKKKKKKKKK 1320

|                 |                    |      |
|-----------------|--------------------|------|
| Bhutan-09024    | YYYYYYYYYYYYYK     | 1320 |
| Bhutan-09027    | YYYYYYYYYYYYYK     | 1320 |
| Bhutan-09030    | YYYYYYYYYYYYYK     | 1320 |
| Bhutan-09005    | YYYYYYYYYYYYYKGGGK | 1320 |
| Indonesia-88035 | TYCCCTTTTCTTTG     | 1320 |
| Indonesia-88045 | TTCCCTTTTCTTTK     | 1320 |
| Indonesia-88065 | YYYYYYYYYYYYYKGGGK | 1320 |
|                 | . . . . .          |      |
| Bhutan-09015    | KKKKKKKKKKKKK      | 1380 |
| Bhutan-09024    | KKKKKKKKKKKKK      | 1380 |
| Bhutan-09027    | KKKKKKKKKKKKK      | 1380 |
| Bhutan-09030    | KKKKKKKKKKKKK      | 1380 |
| Bhutan-09005    | KTKKKGGGKGGK       | 1380 |
| Indonesia-88035 | TKGGGKKKGTGTT      | 1380 |
| Indonesia-88045 | TKGGKKGKGTGTT      | 1380 |
| Indonesia-88065 | KTKKKKKKGGK        | 1380 |
|                 | . . . . .          |      |
| Bhutan-09015    | KKKKKKKKKKKKK      | 1432 |
| Bhutan-09024    | KKKKKKKKKKKKK      | 1432 |
| Bhutan-09027    | KKKKKKKKKKKKK      | 1432 |
| Bhutan-09030    | KKKKKKKKKKKKK      | 1432 |
| Bhutan-09005    | KKKKKKKKKKKKK      | 1432 |
| Indonesia-88035 | GKTTTGTGTTGGT      | 1432 |
| Indonesia-88045 | GTTTGTGTTGGT       | 1432 |
| Indonesia-88065 | KKKKKKKKKKKKK      | 1432 |
|                 | . . . . .          |      |

## Supplementary Figure S4.

CLUSTAL 2.1 multiple sequence alignment

```
Bhutan-09015      MMCMMMMGGGRRGRGRRRRRAGRRRGGARRAGRRRRRRRRRARAGRRRRGWWWTWW 60
Bhutan-09024      AMCMAMMCGRGARRRRGGRRRRARRRRRGRARRAGRRRRGGRRRRRRTWTWWTW 60
Bhutan-09027      MAMMACMGRRRARRRRRGARRRRRARGRRARRRAGRGARRGARARRRRGAGGWWATWT 60
Bhutan-09030      MMMAMMMRRRRARRRRRGRGRARAARRRRRGRGRRRRAARGARAARRARRRWTWWWT 60
Bhutan-09005      MMMMMMMRRRRRRRRRRRRRRRRRRRRRRRRRRRRRRRRRRRRRRRRRRRRRWWWWW 60
Indonesia-88035   MMMMMMMRRRRRRRRRRRRRRRRRRRRRRRRRRRRRRRRRRRRRRRRRRRRRWWWWW 60
Indonesia-88045   MMMMMMMRRRRRRRRRRRRRRRRRRRRRRRRRRRRRRRRRRRRRRRRRRRRRWWWWW 60
Indonesia-88065   MMMMMMMRRRRRRRRRRRRRRRRRRRRRRRRRRRRRRRRRRRRRRRRRRRRRWWWWW 60
```

```
Bhutan-09015      AACCCSSSSSSSSCSYYYYYYTYYYTYYYTYTYCYCTTYYYYYYYTCYTYCCY 120
Bhutan-09024      AWSSSSSSGCSGCCCYTYTYTYTYTYTYTYTYTYTYTYTYTYTYTYTYTYTYTY 120
Bhutan-09027      WSSSSSSCGSSSGSSSTTCCTTCYCCYTYCYTYTYTYTYTYTYTYTYTYTYTYTY 120
Bhutan-09030      AWSSCCSSSSSSSSSYTCYTYTYTYTYTYTYTYTYTYTYTYTYTYTYTYTYTYTY 120
Bhutan-09005      WSSSSSSSSSSSSSSSYTYTYTYTYTYTYTYTYTYTYTYTYTYTYTYTYTYTYTY 120
Indonesia-88035   WSSSSSSSSSSSSSSSYTYTYTYTYTYTYTYTYTYTYTYTYTYTYTYTYTYTYTY 120
Indonesia-88045   WSSSSSSSSSSSSSSSYTYTYTYTYTYTYTYTYTYTYTYTYTYTYTYTYTYTYTY 120
Indonesia-88065   WSSSSSSSSSSSSSSSYTYTYTYTYTYTYTYTYTYTYTYTYTYTYTYTYTYTYTY 120
```

.....

```
Bhutan-09015      TTKKTKKKKGGKG 134
Bhutan-09024      YYKGTTKGTGKKG 134
Bhutan-09027      YTKTKKTKKKKTG 134
Bhutan-09030      TTTGKKKTKKKGTK 134
Bhutan-09005      YYKKKKKKKKKKK 134
Indonesia-88035   YYKKKKKKKKKKK 134
Indonesia-88045   YYKKKKKKKKKKK 134
Indonesia-88065   YYKKKKKKKKKKK 134
```

. . . . .

## Supplementary Figure S5.

CLUSTAL 2.1 multiple sequence alignment

```
Bhutan-09015      AAAAAAAAAAAAAAAAAAAAAAAAAAAAAAAAAAAAAAAAAAAAAAAAAAAAAAAAAAAAA 60
Bhutan-09024      AAAAAAAAAAAAAAAAAAAAAAAAAAAAAAAAAAAAAAAAAAAAAAAAAAAAAAAAAAAAA 60
Bhutan-09027      AAAAAAAAAAAAAAAAAAAAAAAAAAAAAAAAAAAAAAAAAAAAAAAAAAAAAAAAAAAAA 60
Bhutan-09030      AAAAAAAAAAAAAAAAAAAAAAAAAAAAAAAAAAAAAAAAAAAAAAAAAAAAAAAAAAAAA 60
Bhutan-09005      AMAMAMMMMMMAMMAMAMMMAMMMMMMAAMMMMMAMMMMMMCAMAMMMMMAMMCAA 60
Indonesia-88035   MCMAMAAAAAMACMAMMACMMACMAAMMMAAMAAAAAMAMAMMCMCAAAAMAMMM 60
Indonesia-88045   MMMAMAAAAAMAMMAMAACMMAMMMAAMMMAAMAAAAAMAAAAAMAMMCMCAAMMAMMM 60
Indonesia-88065   AMAMAMMMMMMAMMAMAMMMMAAMMAAMMAAMAAAAAMMMAMMAMMMMCAMAMMMMMAMMCAA 60

Bhutan-09015      AAAAAAAAAAAAAAAAAAAAAAAAAAAAAAAAAAAAAAAAAAAAAAAAAAAAAAAAAAAAA 120
Bhutan-09024      AAAAAAAAAAAAAAAAAAAAAAAAAAAAAAAAAAAAAAAAAAAAAAAAAAAAAAAAAAAAA 120
Bhutan-09027      AAAAAAAAAAAAAAAAAAAAAAAAAAAAAAAAAAAAAAAAAAAAAAAAAAAAAAAAAAAAA 120
Bhutan-09030      AAAAAAAAAAAAAAAAAAAAAAAAAAAAAAAAAAAAAAAAAAAAAAAAAAAAAAAAAAAAA 120
Bhutan-09005      MMAAMMAMMMMMMAMAAAMAMMMCMMMCMMCCMMMMAMMMMMMMMMMMMMMMMMMMCM 120
Indonesia-88035   AAMMACAAAAAMAAAMMMCAAAAMCMAMAAAMMAAACMAAACAAAAAMAAACAAAAAMA 120
Indonesia-88045   AAMMACMAAAAAAMMMMAAAAMCCAMAAAMMAAACMAAACAAAAACAAACAAAAAMA 120
Indonesia-88065   MMAMMMAMMMMMAMMMAAMMAMAMCMMMCAMMMAMMAMMMMMMMMMMMCMMMMMMMCM 120

Bhutan-09015      AAAAAAAAAAAAAAAAAAAAAAAAAAAAAAAAAAAAAAAAAAAAAAAAAAAAAACCCCCCCCCCCCCCCCC 180
Bhutan-09024      AAAAAAAAAAAAAAAAAAAAAAAAAAAAAAAAAAAAAAAAAAAAAAAAAAAAAACCCCCCCCCCCCCCCCC 180
Bhutan-09027      AAAAAAAAAAAAAAAAAAAAAAAAAAAAAAAAAAAAAAAAAAAAAAAAAAAAAACCCCCCCCCCCCCCCCC 180
Bhutan-09030      AAAAAAAAAAAAAAAAAAAAAAAAAAAAAAAAAAAAAAAAAAAAAAAAAAAAAACCCCCCCCCCCCCCCCC 180
Bhutan-09005      MAMMMMMMMMMMAMMMMMMAMMMMAAMMMMAAMMMMMMMCMMMMMMMMMMMMMCMMM 180
Indonesia-88035   AMAAACAMAAAMMACAMAMAAAAAMMAAAAAACAAAACACAACMCACCCCCACCMCAC 180
Indonesia-88045   AMAAAMAMAAAMMACAMACAMAAAMMAAAAMMAAAACAMAACMCACCCCCACCMCAC 180
Indonesia-88065   MAMMMMMCAMCCMMAMMMAMMMMAAMMMMAACMMMMCMCAAMCMMMMMMMMMCMCM 180

Bhutan-09015      CCCCCCCCCCCCCCCCCCCCCCCCCCCCCCCCCCCCCCCCCCCCCCCCCCCCCCCCC 240
Bhutan-09024      CCCCCCCCCCCCCCCCCCCCCCCCCCCCCCCCCCCCCCCCCCCCCCCCCCCCCCCCC 240
Bhutan-09027      CCCCCCCCCCCCCCCCCCCCCCCCCCCCCCCCCCCCCCCCCCCCCCCCCCCCCCCCC 240
Bhutan-09030      CCCCCCCCCCCCCCCCCCCCCCCCCCCCCCCCCCCCCCCCCCCCCCCCCCCCCCCCC 240
Bhutan-09005      CCMMMMMCMCMCAMMMMMMMCMCMACMCAMMMCMCMCAMMMCMCAACCMCMCMCM 240
Indonesia-88035   MMCCACCAMCMCAMMAAACCMCCMMCMMAAMMMCMCCMMCCCMAMCCMCMCMCA 240
Indonesia-88045   MMCCAMCAMMAMCMMAAACCMACCAMMCMMMCMMMCMCCMMCCCMAMMMCMCCA 240
Indonesia-88065   CMMMMMCCCMCMAMCMMMMMCMMMMAACMAAACCMCMCACMMCCCMCMCMCMCM 240

Bhutan-09015      CCCCCCCCCCCCCCCCCCCCCCCCCCCCCCCCCCCCCCCCCCCCCCCCCCCCCCCCC 300
Bhutan-09024      CCCCCCCCCCCCCCCCCCCCCCCCCCCCCCCCCCCCCCCCCCCCCCCCCCCCCCCCC 300
Bhutan-09027      CCCCCCCCCCCCCCCCCCCCCCCCCCCCCCCCCCCCCCCCCCCCCCCCCCCCCCCCC 300
Bhutan-09030      CCCCCCCCCCCCCCCCCCCCCCCCCCCCCCCCCCCCCCCCCCCCCCCCCCCCCCCCC 300
Bhutan-09005      CMMMMCCMMMMMMMMAMCCACAMCMCMCCMMMMCMMMMMMMMMMMCMMMCMCM 300
Indonesia-88035   MCCCMMMCAMCCCCCAAMMMACCMCCMMCCCCCMCCCCCCCCCCCMCCCMCC 300
Indonesia-88045   MCCCMMMCAACCCCMCMMAACCMCCMMCCCCCMCCCCCCCCCCCMCCMMCMCC 300
Indonesia-88065   CMCMCCCMMMMMMMMMCCACMMCMCMCCMMMMCMMMMMMMMMMMMMMMCMCM 300
```



Bhutan-09015 CCCCCCCCCCAAAAAAAAAAAAAAAAAAAAAAAAAAAAAAAAAAAAAAAAAA 360  
Bhutan-09024 CCCCCCCCCCAAAAAAAAAAAAAAAAAAAAAAAAAAAAAAAAAAAAAAAAAA 360  
Bhutan-09027 CCCCCCCCCCAAAAAAAAAAAAAAAAAAAAAAAAAAAAAAAAAAAAAAAAAA 360  
Bhutan-09030 CCCCCCCCCCAAAAAAAAAAAAAAAAAAAAAAAAAAAAAAAAAAAAAAAAAA 360  
Bhutan-09005 CMMMMMMMMMRAAAAAAAAARRRRRRRARRRRARAAARRRRRRRARRRRRGRARRRRRAR 360  
Indonesia-88035 MCCCCCCCCCAARRRRRRRAGGARRRRRAARARRAAGAAAGRAAAAAARRRRRRGRAA 360  
Indonesia-88045 MCCCCCCCCCRAARRRRRAARRARGRGAARARRAAGAAAGRAAAAAARRRRRRGRA 360  
Indonesia-88065 MMMMMMMCMMMRRRARAAARRRRGRARARRARAARRRRRRRARRRRRGAAAAARRRRR 360

Bhutan-09015 AAAAAAAAAAAAAAAAAAAAAAAAAAAAAAAAAAAAAAAAAAAAAAAAAAAAA 420  
Bhutan-09024 AAAAAAAAAAAAAAAAAAAAAAAAAAAAAAAAAAAAAAAAAAAAAAAAAAAAA 420  
Bhutan-09027 AAAAAAAAAAAAAAAAAAAAAAAAAAAAAAAAAAAAAAAAAAAAAAAAAAAAA 420  
Bhutan-09030 AAAAAAAAAAAAAAAAAAAAAAAAAAAAAAAAAAAAAAAAAAAAAAAAAAAAA 420  
Bhutan-09005 RAGGARAAAAARRRRAARRRRRARRRRAARAAARRRRRRRARGARRRAARRRARGRAARRR 420  
Indonesia-88035 ARRRRRRRRRRAGRAAAARRRRRAGRRGRRRRAAGRARRRRRRRAGRRRRRARARGRRGAGG 420  
Indonesia-88045 ARRRRRRRRRRRGGRARRAAGARRRAGRRGAAAGARRRRRRRAGRRRRRARARGRRGAGG 420  
Indonesia-88065 RRGGARAAARAGGRRRRRAAGRRRARRAARAAARRRRRRGARGRRRRRAARRRRRRGRAARRR 420

Bhutan-09015 AAAAAAAAAAAAAAAAAAAAAAAAAAAAAAAAAAAAAAAAAAAAAAAAAAAAA 480  
Bhutan-09024 AAAAAAAAAAAAAAAAAAAAAAAAAAAAAAAAAAAAAAAAAAAAAAAAAAAAA 480  
Bhutan-09027 AAAAAAAAAAAAAAAAAAAAAAAAAAAAAAAAAAAAAAAAAAAAAAAAAAAAA 480  
Bhutan-09030 AAAAAAAAAAAAAAAAAAAAAAAAAAAAAAAAAAAAAAAAAAAAAAAAAAAAA 480  
Bhutan-09005 AGRAARRARAGRRRRRRRRRRRRRRRRRRRRRRRRRRRRRRRAAGAAARRRRRRRARARRR 480  
Indonesia-88035 RRARRRGRAARGARAAAAARAAAAAGRRAGAAAAARARARARGRARARRAARGRGRARAAA 480  
Indonesia-88045 RRARRRGRAARRRAGAAAAARAAAAAGRAAGAAAAARRRRRRRRRAGRRARRARAAA 480  
Indonesia-88065 AGRAARRARAGRRRRRRRRRRRRRRRRRRRRRRRRRRRRRRRGAAGARRRRRARRARRA 480

Bhutan-09015 AAAAAAAAAAAAAAAAAAAAAAAAAAAAAAAAAAAAAAAAAAAAAAAAAAAAA 540  
Bhutan-09024 AAAAAAAAAAAAAAAAAAAAAAAAAAAAAAAAAAAAAAAAAAAAAAAAAAAAA 540  
Bhutan-09027 AAAAAAAAAAAAAAAAAAAAAAAAAAAAAAAAAAAAAAAAAAAAAAAAAAAAA 540  
Bhutan-09030 AAAAAAAAAAAAAAAAAAAAAAAAAAAAAAAAAAAAAAAAAAAAAAAAAAAAA 540  
Bhutan-09005 RGRGRRRRRRRRRRRRRRRRRRRRRRRRRRRRRRRRRRRRRRRRRRRARARRR 540  
Indonesia-88035 ARGRRARAGAGAAAGAAARARRRAAAGRRRRRRRRRRRRRRRRRRRRRRRRRRRRRRRRRR 540  
Indonesia-88045 ARGRRARRRAGARAGAAARRARARAAAGRRRRRRRRRRRRRRRRRRRRRRRRRRRRRRRRRR 540  
Indonesia-88065 RGRARRARGRRRRRRRRRRRRRRRRRRRRRRRRRRRRRRRRRRRRRRRRRRRRRRRRRR 540

Bhutan-09015 AAAAAAAAAAAAAAAAAAAAAAAAAAAAAAAAAAAAAAAAAAAAAAAAAAAAA 600  
Bhutan-09024 AAAAAAAAAAAAAAAAAAAAAAAAAAAAAAAAAAAAAAAAAAAAAAAAAAAAA 600  
Bhutan-09027 AAAAAAAAAAAAAAAAAAAAAAAAAAAAAAAAAAAAAAAAAAAAAAAAAAAAA 600  
Bhutan-09030 AAAAAAAAAAAAAAAAAAAAAAAAAAAAAAAAAAAAAAAAAAAAAAAAAAAAA 600  
Bhutan-09005 RRRRAARAAARGARRRRRRRRRRRRRRRRRRRRRRRRRRRRRRRRRRRAAAAAARRRRR 600  
Indonesia-88035 AGAARRRRRRARRRARRRARRRRRRRRRRRRRRRRRRRRRRRRRRRRRRRRRRRRRRRRRR 600  
Indonesia-88045 RRAARRRRRRARRRARRRARRRRRRRRRRRRRRRRRRRRRRRRRRRRRRRRRRRRRRRRRR 600  
Indonesia-88065 RRARRARAAARGRRRRRRRRRRRRRRRRRRRRRRRRRRRRRRRRRRRRRRRRRRRRRRRR 600

Bhutan-09015 AAAAAAAAAAAAAAAAAAAAAAAAAAAAAAAAAAAAAAAAAAAAAAAAAAAAA 660  
Bhutan-09024 AAAAAAAAAAAAAAAAAAAAAAAAAAAAAAAAAAAAAAAAAAAAAAAAAAAAA 660

Bhutan-09027 AAAAAAAAAAAAAAAAAAAAAAAAAAAAAAAAAAAAAAAAAAAAAAAAAAAAAAAAAAAAAAAAAA 660  
Bhutan-09030 AAAAAAAAAAAAAAAAAAAAAAAAAAAAAAAAAAAAAAAAAAAAAAAAAAAAAAAAAAAAAAAAAA 660  
Bhutan-09005 RRRRAARRRRRRRRRRRRRRRRRRRRRRRRARRRRRRRRRRRRRRRRRRRRRRRRRRRRRR 660  
Indonesia-88035 AAARRRAAAAAGAAARAGAAAAGAAAARRRARRRARAAGAAAAAAAAAAAAAAAAAAAAAAAAA 660  
Indonesia-88045 AAARRRAAAAAGAAAGAGAAAAGAAAAGRAGRRARAAGAAAAAAAAAAAAAAAAAAAAAAAAA 660  
Indonesia-88065 RRRRAAARRRRRRRRRRRRRRRRRRRRRRRGARRRGRARRRRRRRRRRRRRRRRRRRRRRRR 660

Bhutan-09015 AAAAAAAAAAAAAAAAAAAAAAAAAAAAAAAAAAAAAAAAAAAAAAAAAAAAAAAAAAAAAAAAAA 720  
Bhutan-09024 AAAAAAAAAAAAAAAAAAAAAAAAAAAAAAAAAAAAAAAAAAAAAAAAAAAAAAAAAAAAAAAAAA 720  
Bhutan-09027 AAAAAAAAAAAAAAAAAAAAAAAAAAAAAAAAAAAAAAAAAAAAAAAAAAAAAAAAAAAAAAAAAA 720  
Bhutan-09030 AAAAAAAAAAAAAAAAAAAAAAAAAAAAAAAAAAAAAAAAAAAAAAAAAAAAAAAAAAAAAAAAAA 720  
Bhutan-09005 RRRRRRRRRRGAAAAAGRRRRARRRRRRRAAAARRRRRRRRRRRRRRRRRRRRRRRRRRRR 720  
Indonesia-88035 AARAAGRARRRRRARARRAARAGARAAAARRRRRGAAAAAAAAARRRRRAAAARRRAAA 720  
Indonesia-88045 AAGAAGGARRRRRRRRAAAARGARAAAARRRRRAAAAAAAAAARRRAAAARRRAAA 720  
Indonesia-88065 RRRRRRRRRGGRRRRARRRRRRRRRRRRRRRRRRRRRRRRRRRRRRRRRRRRRRRRRRRA 720

Bhutan-09015 AAAAAAAAAAAAAAAAAAAAAAAAAAAAAAAAAAAAAAAAAAAAAAAAAAAAAAAAAAGGGGGGGGGGG 780  
Bhutan-09024 AAAAAAAAAAAAAAAAAAAAAAAAAAAAAAAAAAAAAAAAAAAAAAAAAAAAAAAAAAGGGGGGGGGGG 780  
Bhutan-09027 AAAAAAAAAAAAAAAAAAAAAAAAAAAAAAAAAAAAAAAAAAAAAAAAAAAAAAAAAAGGGGGGGGGGG 780  
Bhutan-09030 AAAAAAAAAAAAAAAAAAAAAAAAAAAAAAAAAAAAAAAAAAAAAAAAAAAAAAAAAAGGGGGGGGGGG 780  
Bhutan-09005 RRRRRRRRRRRARRRRRRRRRRRRRRRRRRRRRRRRRRRRRRRRRRRRRRRRRRRRRRRR 780  
Indonesia-88035 ARAARGRAAAARAAGAGRGARAARAAAAGAAAAAAAAAGAAAAARRRRRRRRRRRRRR 780  
Indonesia-88045 AGAARGAAAAARAARAGGRARAARAAAAGAAAAAAAAAGAAAAARRRRRRRRRRRRRR 780  
Indonesia-88065 RRRRARRRRRRRRRRRRRRRRRRRRRRRRRRRRRRRRRRRRRRRRRRRRRRRRRRRRRRR 780

Bhutan-09015 GGGGGGGGGGGGGGGGGGGGGGGGGGGGGGGGGGGGGGGGGGGGGGGGGGGGGGGGGGGGG 840  
Bhutan-09024 GGGGGGGGGGGGGGGGGGGGGGGGGGGGGGGGGGGGGGGGGGGGGGGGGGGGGGGGGGGGG 840  
Bhutan-09027 GGGGGGGGGGGGGGGGGGGGGGGGGGGGGGGGGGGGGGGGGGGGGGGGGGGGGGGGGGGGG 840  
Bhutan-09030 GGGGGGGGGGGGGGGGGGGGGGGGGGGGGGGGGGGGGGGGGGGGGGGGGGGGGGGGGGGGG 840  
Bhutan-09005 RGRRRRRRRRRRRRRRRRRRRRRRRRRRRRRRRRRRRRRRRRRRRRRRRRRRRRRRRRR 840  
Indonesia-88035 RRRGGGGGGGAAGGGGGGGGGGGRRRRRRRRRRRRRRRRRRRRRRRRRRRRRRRRRRRR 840  
Indonesia-88045 ARGGGGGGGGAAGGGGGGGGGGGRRRRRRRRRRRRRRRRRRRRRRRRRRRRRRRRRRRR 840  
Indonesia-88065 AGRRRRRRRRRRRRRRRRRRRRRRRRRRRRRRRRRRRRRRRRRRRRRRRRRRRRRRRRR 840

Bhutan-09015 GGGGGGGGGGGGGGGGGGGGGGGGGGGGGGGGGGGGGGGGGGGGGGGGGGGGGGGGGGGGG 900  
Bhutan-09024 GGGGGGGGGGGGGGGGGGGGGGGGGGGGGGGGGGGGGGGGGGGGGGGGGGGGGGGGGGGGG 900  
Bhutan-09027 GGGGGGGGGGGGGGGGGGGGGGGGGGGGGGGGGGGGGGGGGGGGGGGGGGGGGGGGGGGGG 900  
Bhutan-09030 GGGGGGGGGGGGGGGGGGGGGGGGGGGGGGGGGGGGGGGGGGGGGGGGGGGGGGGGGGGGG 900  
Bhutan-09005 RGRGGRARRGRRRRAAGRRGGGRGRARRRRRRRRRRRRRRRRRRRRRRRRRRRRRRRRRR 900  
Indonesia-88035 ARGRRARRRRRRRRRRRRRRRRRRRRRRRRRRRRRRRRRRRRRRRRRRRRRRRRRRRRRR 900  
Indonesia-88045 ARGRRRRARRRRRRRRRRRRRRRRRRRRRRRRRRRRRRRRRRRRRRRRRRRRRRRRRRRR 900  
Indonesia-88065 RGRGRRARRGRRRARRRRRRRRRRRRRRRRRRRRRRRRRRRRRRRRRRRRRRRRRRRRRR 900

Bhutan-09015 GGGGGGGGGGGGGGGGGGGGGGGGGGGGGGGGGGGGGGGGGGGGGGGGGGGGGGGGGGGGG 960  
Bhutan-09024 GGGGGGGGGGGGGGGGGGGGGGGGGGGGGGGGGGGGGGGGGGGGGGGGGGGGGGGGGGGGG 960  
Bhutan-09027 GGGGGGGGGGGGGGGGGGGGGGGGGGGGGGGGGGGGGGGGGGGGGGGGGGGGGGGGGGGGG 960  
Bhutan-09030 GGGGGGGGGGGGGGGGGGGGGGGGGGGGGGGGGGGGGGGGGGGGGGGGGGGGGGGGGGGGG 960  
Bhutan-09005 RRRRRRRRRRRRRRRRRRRRRRRRRRRRRRRRRRRRRRRRRRRRRRRRRRRRRRRRRRR 960  
Indonesia-88035 GGRGGRGAGGGGGARGAGRRRRRRRRRRRRRRRRRRRRRRRRRRRRRRRRRRRRRRRRRA 960



Bhutan-09015 GGGGGGGGGGGGGGGGGGGGAAAAAAAAAAAAAAAAAAAAAAAAAAAAAAAAAAAAAAAAA 1320  
Bhutan-09024 GGGGGGGGGGGGGGGGGGGGAAAAAAAAAAAAAAAAAAAAAAAAAAAAAAAAAAAAAAAAA 1320  
Bhutan-09027 GGGGGGGGGGGGGGGGGGGGAAAAAAAAAAAAAAAAAAAAAAAAAAAAAAAAAAAAAAAAA 1320  
Bhutan-09030 GGGGGGGGGGGGGGGGGGGGAAAAAAAAAAAAAAAAAAAAAAAAAAAAAAAAAAAAAAAAA 1320  
Bhutan-09005 RRRRRRRRRRRRRRRRRRRRWWAWWWWWAAAAWWWWWWAWAWWWAWWWWWTTWWA 1320  
Indonesia-88035 GGGGGGGGGGGGGGGGGGGTAWTWAAAAWWAWATTWAWAWAAAAAWATWWAT 1320  
Indonesia-88045 GGGGGGGGGGGGGGGGGGGTAWTWAAAAWWAWATTWAWAWAAAAAWATWWAT 1320  
Indonesia-88065 RRRRRRRRRRRRRRRRRRRRTWTWAWWWWWAAAAWTTAAWAWATTWWWWWWTTWW 1320

Bhutan-09015 AAAAAAAAAAAAAAAAAAAAAAAAAAAAAAAAAAAAAAAAAAAAAAAAAAAAAAAAAAAAAA 1380  
Bhutan-09024 AAAAAAAAAAAAAAAAAAAAAAAAAAAAAAAAAAAAAAAAAAAAAAAAAAAAAAAAAAAAAA 1380  
Bhutan-09027 AAAAAAAAAAAAAAAAAAAAAAAAAAAAAAAAAAAAAAAAAAAAAAAAAAAAAAAAAAAAAA 1380  
Bhutan-09030 AAAAAAAAAAAAAAAAAAAAAAAAAAAAAAAAAAAAAAAAAAAAAAAAAAAAAAAAAAAAAA 1380  
Bhutan-09005 AWWWWWWWWWWTTAATWWWAAAAWAAWAAWAAWAAWAAWAAWAAWAAWAAWAAWAA 1380  
Indonesia-88035 WTTTATTAATATWWWATAAWAWATWTTWAWAAWWWWAAWTTWAAAAAAWAWWWA 1380  
Indonesia-88045 WATTAWTAATATWWWATAAWAWATWTTWAWAAWWWWAAWTTWAAAAAAWAWWWW 1380  
Indonesia-88065 WWWWWWWWWWTTAATWWWAAAAWAAWAAWAAWAAWAAWAAWAAWAAWAAWAAWAAW 1380

Bhutan-09015 AAAAAAAAAAAAAAAAAAAAAAAAAAAAAAAAAAAAAAAAAAAAAAAAAAAAAAAAAAAAAA 1440  
Bhutan-09024 AAAAAAAAAAAAAAAAAAAAAAAAAAAAAAAAAAAAAAAAAAAAAAAAAAAAAAAAAAAAAA 1440  
Bhutan-09027 AAAAAAAAAAAAAAAAAAAAAAAAAAAAAAAAAAAAAAAAAAAAAAAAAAAAAAAAAAAAAA 1440  
Bhutan-09030 AAAAAAAAAAAAAAAAAAAAAAAAAAAAAAAAAAAAAAAAAAAAAAAAAAAAAAAAAAAAAA 1440  
Bhutan-09005 AWAAWWAWWAAWAAWAAWAAWAAWAAWAAWAAWAAWAAWAAWAAWAAWAAWAAWAAW 1440  
Indonesia-88035 WAWWAAWAAWAAWAAWAAWAAWAAWAAWAAWAAWAAWAAWAAWAAWAAWAAWAAWAA 1440  
Indonesia-88045 AAWWAAWAAWAAWAAWAAWAAWAAWAAWAAWAAWAAWAAWAAWAAWAAWAAWAAWAA 1440  
Indonesia-88065 WWAAWAAWAAWAAWAAWAAWAAWAAWAAWAAWAAWAAWAAWAAWAAWAAWAAWAAW 1440

Bhutan-09015 AAAAAAAAAAAAAAAAAAAAAAAAAAAAAAAAAAAAAAAAAAAAAAAAAAAAAATTTTTTTTTTT 1500  
Bhutan-09024 AAAAAAAAAAAAAAAAAAAAAAAAAAAAAAAAAAAAAAAAAAAAAAAAAAAAAATTTTTTTTTTT 1500  
Bhutan-09027 AAAAAAAAAAAAAAAAAAAAAAAAAAAAAAAAAAAAAAAAAAAAAAAAAAAAAATTTTTTTTTTT 1500  
Bhutan-09030 AAAAAAAAAAAAAAAAAAAAAAAAAAAAAAAAAAAAAAAAAAAAAAAAAAAAAATTTTTTTTTTT 1500  
Bhutan-09005 WWWWAAWAAWAAWAAWAAWAAWAAWAAWAAWAAWAAWAAWAAWAAWAAWAAWAAWAAW 1500  
Indonesia-88035 AAAAAAWWAAAAAAWAAAAAAATAAATAAWWAAAAWAAAAWTTAATTTTTW 1500  
Indonesia-88045 AAAAAAWWAAAAAAWAAAAAAATAAATAAWWAAAAWAAAAWTTAATTTTTW 1500  
Indonesia-88065 WWWWAAWAAWAAWAAWAAWAAWAAWAAWAAWAAWAAWAAWAAWAAWAAWAAWAAWAAW 1500

Bhutan-09015 TTTTTTTTTTTTTTTTTTTTTTTTTTTTTTTTTTTTTTTTTTTTTTTTTTTTTTTTTTTTT 1560  
Bhutan-09024 TTTTTTTTTTTTTTTTTTTTTTTTTTTTTTTTTTTTTTTTTTTTTTTTTTTTTTTTTTTTT 1560  
Bhutan-09027 TTTTTTTTTTTTTTTTTTTTTTTTTTTTTTTTTTTTTTTTTTTTTTTTTTTTTTTTTTTTT 1560  
Bhutan-09030 TTTTTTTTTTTTTTTTTTTTTTTTTTTTTTTTTTTTTTTTTTTTTTTTTTTTTTTTTTTTT 1560  
Bhutan-09005 WWTWTTWWTWWTWTTWTTWTTWTTWTTWTTWTTWTTWTTWTTWTTWTTWTTWTTWTTW 1560  
Indonesia-88035 TAWWWWTAWTTWAWAWTTWWWWTTWATAATWTTTWTWTTWTTWTTWTTWTTWTTWTTW 1560  
Indonesia-88045 TWWTTWTTWTTWTTWAWTTWWWWTTWATAATWTTTWTWTTWTTWTTWTTWTTWTTWTTW 1560  
Indonesia-88065 TWTWTTWTTWTTWTTWTTWTTWTTWTTWTTWTTWTTWTTWTTWTTWTTWTTWTTWTTW 1560

Bhutan-09015 TTTTTTTTTTTTTTTTTTTTTTTTTTTTTTTTTTTTTTTTTTTTTTTTTTTTTTTTTTTTT 1620  
Bhutan-09024 TTTTTTTTTTTTTTTTTTTTTTTTTTTTTTTTTTTTTTTTTTTTTTTTTTTTTTTTTTTTT 1620  
Bhutan-09027 TTTTTTTTTTTTTTTTTTTTTTTTTTTTTTTTTTTTTTTTTTTTTTTTTTTTTTTTTTTTT 1620  
Bhutan-09030 TTTTTTTTTTTTTTTTTTTTTTTTTTTTTTTTTTTTTTTTTTTTTTTTTTTTTTTTTTTTT 1620

Bhutan-09005 TWWAWTTWWWWTTWTTWWAWTATTTTAWTTWWWWWWTAWTTTTTWWAWTWTAWTWTW 1620  
Indonesia-88035 WTWATWTTTTTTWWTWTWATTTWWWWWWTTWWWWTTTWTWTWTTWWWWTTTWTWTWTWT 1620  
Indonesia-88045 WTWATWTTTTTTWWTWTWATTTWWWWWWTTWTTWTTTWTWAWTTTTTWTWTTWTWTWTWT 1620  
Indonesia-88065 TWTWTTWWWWTTWTTWWWWTATTTTWTWTTWTTWWWWAWTTTTTWWWWTTTAWTWTWTW 1620

Bhutan-09015 TTTTTTTTTTTTTTTTTTTTTTTTTTTTTTTTTTTTTTTTTTTTTTTTTTTTTTTTTTTTTTTT 1680  
Bhutan-09024 TTTTTTTTTTTTTTTTTTTTTTTTTTTTTTTTTTTTTTTTTTTTTTTTTTTTTTTTTTTTTTTT 1680  
Bhutan-09027 TTTTTTTTTTTTTTTTTTTTTTTTTTTTTTTTTTTTTTTTTTTTTTTTTTTTTTTTTTTTTTTT 1680  
Bhutan-09030 TTTTTTTTTTTTTTTTTTTTTTTTTTTTTTTTTTTTTTTTTTTTTTTTTTTTTTTTTTTTTTTT 1680  
Bhutan-09005 TWTWWWWWWWWWWTTTWWWWWWTTWWWWWWTWWAAATWTTWWWWWWWWTTWWWWTT 1680  
Indonesia-88035 TTWTTTTTTTTTTTTTWTTTTTTTTTTWTWTTTTTTWATTWTTWATTTTTTWWAWTTTTTW 1680  
Indonesia-88045 WTWTTTTTTTTTTTTTWWTTTTTTTTTWTWTTTTTTWATTWTTWATTTTTTWWAWTTTTTW 1680  
Indonesia-88065 TWTWWWWWWWWWWTTTWWWWWWTTWWWWWWWWAAWTTWWWWWWTTATWTTWWTT 1680

Bhutan-09015 TTTTTTTTTTTTTTCCCCCCCCCCCCCCCCCCCCCCCCCCCCCCCCCCCCCCCCCCCCCCCC 1740  
Bhutan-09024 TTTTTTTTTTTTTTCCCCCCCCCCCCCCCCCCCCCCCCCCCCCCCCCCCCCCCCCCCCCCCC 1740  
Bhutan-09027 TTTTTTTTTTTTTTCCCCCCCCCCCCCCCCCCCCCCCCCCCCCCCCCCCCCCCCCCCCCCCC 1740  
Bhutan-09030 TTTTTTTTTTTTTTCCCCCCCCCCCCCCCCCCCCCCCCCCCCCCCCCCCCCCCCCCCCCCCC 1740  
Bhutan-09005 WTWWWWWWTWWWWWSSSSSSCSCSSSSCCGCGSSCCSCSSSSCSCSSSSCSCSSGSC 1740  
Indonesia-88035 TTTWTTTTTTTTTTSCSCCSCSCSSSSSSSGGSSCCGCCSSGCCSSCCSCSSSS 1740  
Indonesia-88045 TWTTTTTTWWTTTTTCSSCCGSSCSCSSSSSGGSSCCGCCSSGCCSSCCSCSSSS 1740  
Indonesia-88065 WTWTWTTTWWWWWSSSSSSCSCCCCCCGSGSGSCSSSSSSSSSSCSCSSSSSGCCC 1740

Bhutan-09015 CCCCCCCCCCCCCCCCCCCCCCCCCCCCCCCCCCCCCCCCCCCCCCCCCCCCCCCCCCCCCGGGGGGGGGG 1800  
Bhutan-09024 CCCCCCCCCCCCCCCCCCCCCCCCCCCCCCCCCCCCCCCCCCCCCCCCCCCCCCCCCCCCCGGGGGGGGGG 1800  
Bhutan-09027 CCCCCCCCCCCCCCCCCCCCCCCCCCCCCCCCCCCCCCCCCCCCCCCCCCCCCCCCCCCCCGGGGGGGGGG 1800  
Bhutan-09030 CCCCCCCCCCCCCCCCCCCCCCCCCCCCCCCCCCCCCCCCCCCCCCCCCCCCCCCCCCCCCGGGGGGGGGG 1800  
Bhutan-09005 CSCSSSSSSSSCSCSSSSSSSSSCSSSSSSCSCSSSSCSCSSSSGSSSSSSSGGGCG 1800  
Indonesia-88035 SCSCCCCCCSCCGCCCCCSCGCCCCCCSCCCSCSCCGCCSCCCGGGSSSSSS 1800  
Indonesia-88045 SCSCCCCCCSCCGCCCCCSCGCCCCCCSCCCSCSCCGCCSCCCGGGSSSSSS 1800  
Indonesia-88065 CSCSSSSSSSCSCSSSSSSSSSCSSSSSSGSSSSSSCSCSGSSGSSSSSSSGGGCG 1800

Bhutan-09015 GGGGGGGGGGGGGGGGGGGGGGGGGGGGGGGGGGGGGGGGGGGGGGGGGGGGGGGGGGGGGGG 1860  
Bhutan-09024 GGGGGGGGGGGGGGGGGGGGGGGGGGGGGGGGGGGGGGGGGGGGGGGGGGGGGGGGGGGGGGG 1860  
Bhutan-09027 GGGGGGGGGGGGGGGGGGGGGGGGGGGGGGGGGGGGGGGGGGGGGGGGGGGGGGGGGGGGGGG 1860  
Bhutan-09030 GGGGGGGGGGGGGGGGGGGGGGGGGGGGGGGGGGGGGGGGGGGGGGGGGGGGGGGGGGGGGGG 1860  
Bhutan-09005 GSSGSCCGSSGSSSSSSGSGSSGSSCSCSSGSSGSSGSSGSSGSSSSSSCSCSSSSSSSS 1860  
Indonesia-88035 SCGSSSSSSSCGSGGGSSCSCSSCGGSSGSSSSCSCSSSSSCGSGGGGSGGGCGGGGG 1860  
Indonesia-88045 SCGSGSSSSSCGSGGGSSCSCSSCSCSSGSSGSSCSCSSGSSGSGGGGSGGGCGGGGG 1860  
Indonesia-88065 GSSGSCCGSSGSSSSSSGSGGGSSCSCSSGSSGSSGSSGSSGSSSSSSCSCSSSSSSSS 1860

Bhutan-09015 GGGGGGGGGGGGGGGGGGGGGGGGGGGGGGGGGGGGGGGGGGGGGGGGGGGGGGGGGGGGGGG 1920  
Bhutan-09024 GGGGGGGGGGGGGGGGGGGGGGGGGGGGGGGGGGGGGGGGGGGGGGGGGGGGGGGGGGGGGGG 1920  
Bhutan-09027 GGGGGGGGGGGGGGGGGGGGGGGGGGGGGGGGGGGGGGGGGGGGGGGGGGGGGGGGGGGGGGG 1920  
Bhutan-09030 GGGGGGGGGGGGGGGGGGGGGGGGGGGGGGGGGGGGGGGGGGGGGGGGGGGGGGGGGGGGGGG 1920  
Bhutan-09005 SSSSSGSSGGCSCSSSSSSSSSTTCYCYCCCTYYYCYCYYYYYYYYCYCYYYYYTY 1920  
Indonesia-88035 GGGGGSGGSSGSCSGGSGGGGYYTCTCYYYTYYTYCCCTCTCCYCCYTCYCYT 1920  
Indonesia-88045 GGGGGSGGSSGCGGGGCGGGGYYTCTCYYYTYYTYCCCTCTCCYCCYTCYCYT 1920  
Indonesia-88065 SSSSSGSSGGCCSSSSSSSSSYCYCCYTYTYCTCCYCYYYYYYYYCYCYYYYYCYT 1920











## Supplementary Figure S6.

CLUSTAL 2.1 multiple sequence alignment

```
Bhutan-09015      MMACMCAAMMMMMMAMAMAMMMCCMMMMMCMAMMMACAAMMMCCMMMMMMRRRRRRRG 60
Bhutan-09024      MMMMACAMMAMMMMMMAAACMCCMMMCMMCAMMMMMAMMMCCMCMMMMCRAARARAR 60
Bhutan-09027      AMMMAMAMCMCACMMMMMAAMCMMMAAMAAMMCCAAMMMCCAMMAMMAACARRARGRR 60
Bhutan-09030      MAMMMMMMMAMCMAAAMMMCMCAMMMMMCCMAAMMMMMMMCCAMAMRAAARGRR 60
Bhutan-09005      AAAAAAAAAAAAAAAAAAACCCCCCCCCCCCCCCCCCCCCCCCCCAAAAAAAAAA 60
Indonesia-88035   AAAAAAAAAAAAAAAAAAACCCCCCCCCCCCCCCCCCCCCCCCCCAAAAAAAAAA 60
Indonesia-88045   AAAAAAAAAAAAAAAAAAACCCCCCCCCCCCCCCCCCCCCCCCCCAAAAAAAAAA 60
Indonesia-88065   AAAAAAAAAAAAAAAAAAACCCCCCCCCCCCCCCCCCCCCCCCCCAAAAAAAAAA 60

Bhutan-09015      RRRRAGAAARRRGGGAGRRRARRRARRRRRRRRARRRARAARRRRRRRAAAARRR 120
Bhutan-09024      RRGRRAGRRAAARGGRRRAARRRGRARAAARRRRRRARRARRRRRAAAARRAR 120
Bhutan-09027      RRRRARRRRAAARGGRRRARARAAAGGAARRRGAGRRARRRAAGAGRARARRRRGAA 120
Bhutan-09030      GGGGAAGRRAAARRRRRRRAARRRARRRRRRRRRRRRRARGAARGRRRRRRRAARRR 120
Bhutan-09005      AAAAAAAAAAAAAAAAAAAAAAAAAAAAAAAAAAAAAAAAAAAAAAAAAAAAAAAAAA 120
Indonesia-88035   AAAAAAAAAAAAAAAAAAAAAAAAAAAAAAAAAAAAAAAAAAAAAAAAAAAAAAAAAA 120
Indonesia-88045   AAAAAAAAAAAAAAAAAAAAAAAAAAAAAAAAAAAAAAAAAAAAAAAAAAAAAAAAAA 120
Indonesia-88065   AAAAAAAAAAAAAAAAAAAAAAAAAAAAAAAAAAAAAAAAAAAAAAAAAAAAAAAAAA 120

Bhutan-09015      RRRRAGRGRRARGRAARRRRRAARRRARRGGGRRRGRRRRRRAGRRRRRRRRRGR 180
Bhutan-09024      AARARRARRRAGRRAAARRRRRAARRRRRGGGGARGRRRRRGRRRRAGRRRRGARR 180
Bhutan-09027      RRRRARARGGRRRARRRRAARRARRAGARRGRRRRAGGGRGRGARGAAGRGARRRG 180
Bhutan-09030      RRAARRARRRAGRRRRRRRGAARRRRARGRRRRRAGGRRGGRARRRRRRRAAGRR 180
Bhutan-09005      AAAAAAAAAAAAAAAAAAAAAAAAAAAAGGGGGGGGGGGGGGGGGGGGGGGGGGG 180
Indonesia-88035   AAAAAAAAAAAAAAAAAAAAAAAAAAAAGGGGGGGGGGGGGGGGGGGGGGGGGGG 180
Indonesia-88045   AAAAAAAAAAAAAAAAAAAAAAAAAAAAGGGGGGGGGGGGGGGGGGGGGGGGGGG 180
Indonesia-88065   AAAAAAAAAAAAAAAAAAAAAAAAAAAAGGGGGGGGGGGGGGGGGGGGGGGGGGG 180

Bhutan-09015      RRRRRRRRRRRRRRRGARRRGGRRARGRRRRRRRRRRRRARRRRGRGRRGGRRRR 240
Bhutan-09024      GRARRRRRRRRRGAAGARARGRRRRRRRRRRRRRRRRARRRGGFRRRRRRRGRGG 240
Bhutan-09027      RGAARRRRGGAGRRRRRRRRRRRRRRRRRRRRRRRRRRRRRRRRRRRRRRRRRR 240
Bhutan-09030      GRARGRAAGRRGGARRARRARGARGAAGRRRRARRARRARRARAAGARRRRRRR 240
Bhutan-09005      GGGGGGGGGGGGGGGGGGGGGGGGGGGGGGGGGGGGGGGGGGGGGGGGGGGGGGG 240
Indonesia-88035   GGGGGGGGGGGGGGGGGGGGGGGGGGGGGGGGGGGGGGGGGGGGGGGGGGGGGGG 240
Indonesia-88045   GGGGGGGGGGGGGGGGGGGGGGGGGGGGGGGGGGGGGGGGGGGGGGGGGGGGGGG 240
Indonesia-88065   GGGGGGGGGGGGGGGGGGGGGGGGGGGGGGGGGGGGGGGGGGGGGGGGGGGGGGG 240

Bhutan-09015      GGRRRRRRRGRGRRRRRRRRRRRRRRRRRRAWWWWAWWWWWAWWWWTAWWWAWAA 300
Bhutan-09024      RGRRRRRRRGGRRRRRRRRRRRRRRRRRRWWAWWWWWTAWWWWWAWWTTWAWAW 300
Bhutan-09027      RGARRRAARGRGRAARGAAARRRRRARRRWTWTTWAWAWWWATWWAWTAWAWWW 300
Bhutan-09030      RRARGAARRRGGRRRRRRRAARAARGAAGTWWWTAAATAWWTWWWWAWTAAWAA 300
Bhutan-09005      GGGGGGGGGGGGGGGGGGGGGGGGGGGGGGGGGGGGGGGGGGGGGGGGGGGGGGG 300
Indonesia-88035   GGGGGGGGGGGGGGGGGGGGGGGGGGGGGGGGGGGGGGGGGGGGGGGGGGGGGGG 300
Indonesia-88045   GGGGGGGGGGGGGGGGGGGGGGGGGGGGGGGGGGGGGGGGGGGGGGGGGGGGGGG 300
Indonesia-88065   GGGGGGGGGGGGGGGGGGGGGGGGGGGGGGGGGGGGGGGGGGGGGGGGGGGGGGG 300
```

Bhutan-09015 WWATTTWWTTTTWWWWWTTWTTWTTWWWWWTTSSCCSSSSSSSSSSSSSCGSCGGGCC 360  
Bhutan-09024 WTTWTTTTWWWWWATTWAAATWTTWAAWWATWTTTTCSSCCSSSGSSSCSSSSGCGSSGGSCC 360  
Bhutan-09027 AWWTTAAWWWWWATAWTTWTTWTTWWWWWSSCCSCSCGSCCCSSSSSSSSSSSSGSS 360  
Bhutan-09030 AWWWWWTTWTTWWWWWTTWTTWWWWWTTWTTWWWWWCCSCSCSSSSSSGSCSCGSSSSSSSSCS 360  
Bhutan-09005 AAATTTTTTTTTTTTTTTTTTTTTTTTTTTTTTTTTTTTTTTTTCCCCCCCCCCCCCCCCCCGGGGGGG 360  
Indonesia-88035 AAATTTTTTTTTTTTTTTTTTTTTTTTTTTTTTTTTTTTTTTTTCCCCCCCCCCCCCCCCCCGGGGGGG 360  
Indonesia-88045 AAATTTTTTTTTTTTTTTTTTTTTTTTTTTTTTTTTTTTTTTTTCCCCCCCCCCCCCCCCCCGGGGGGG 360  
Indonesia-88065 AAATTTTTTTTTTTTTTTTTTTTTTTTTTTTTTTTTTTTTTTTTCCCCCCCCCCCCCCCCCCGGGGGGG 360

..... . . . . .

Bhutan-09015 SSSSGSSSGGSCYCCYYYYYCYTYYYYYCYCCYCTCCCCCYYYCTYYCYCCYYYYYCY 420  
Bhutan-09024 GSSCSSSGCGGCYCYTYTYCYCTYCYTYCYCCCTCCCTCCYCTCYCCYTYCTCC 420  
Bhutan-09027 SSSCSSSSGSCYCTCYCCYTYTYCYTYCYCCYCYTYCYTYCYTYTYTYTYTYTYTYTYTY 420  
Bhutan-09030 SCSCSCSSSGCCYTYTYTYTYTYTYTYTYTYTYTYTYTYTYTYTYTYTYTYTYTYTYTYTY 420  
Bhutan-09005 GGGGGGGGGGGCCCCCCCCCCCCCCCCCCCCCCCCCCCCCCCCCCCCCCCCCCCCCCCC 420  
Indonesia-88035 GGGGGGGGGGGCCCCCCCCCCCCCCCCCCCCCCCCCCCCCCCCCCCCCCCCCCCCCCCC 420  
Indonesia-88045 GGGGGGGGGGGCCCCCCCCCCCCCCCCCCCCCCCCCCCCCCCCCCCCCCCCCCCCCCCC 420  
Indonesia-88065 GGGGGGGGGGGCCCCCCCCCCCCCCCCCCCCCCCCCCCCCCCCCCCCCCCCCCCCCCCC 420

. . . . .

Bhutan-09015 YCCCTYTYTYTCCYCYTYTYTYTYTYTYTYTYTYTYTYTYTYTYTYTYTYTYTYTYTYTY 480  
Bhutan-09024 CCYTYTYCTTTCCCTYCYTYTYTYTYTYTYTYTYTYTYTYTYTYTYTYTYTYTYTYTYTY 480  
Bhutan-09027 YTYTYTYTYTYTYTYTYTYTYTYTYTYTYTYTYTYTYTYTYTYTYTYTYTYTYTYTYTY 480  
Bhutan-09030 YCYTYTYTYTYTYTYTYTYTYTYTYTYTYTYTYTYTYTYTYTYTYTYTYTYTYTYTYTY 480  
Bhutan-09005 CCCCCCCCCCCCCCCCCCCCCCCCCCCCCCCCCCCCCCCCCCCCCCCCCCCCCCCCCCCCC 480  
Indonesia-88035 CCCCCCCCCCCCCCCCCCCCCCCCCCCCCCCCCCCCCCCCCCCCCCCCCCCCCCCCCCCCC 480  
Indonesia-88045 CCCCCCCCCCCCCCCCCCCCCCCCCCCCCCCCCCCCCCCCCCCCCCCCCCCCCCCCCCCCC 480  
Indonesia-88065 CCCCCCCCCCCCCCCCCCCCCCCCCCCCCCCCCCCCCCCCCCCCCCCCCCCCCCCCCCCCC 480

Bhutan-09015 TYCYTYTYTYTYTYTYTYTYTYTYTYTYTYTYTYTYTYTYTYTYTYTYTYTYTYTYTYTY 540  
Bhutan-09024 TCYTYTYTYTYTYTYTYTYTYTYTYTYTYTYTYTYTYTYTYTYTYTYTYTYTYTYTYTY 540  
Bhutan-09027 YTYTYTYTYTYTYTYTYTYTYTYTYTYTYTYTYTYTYTYTYTYTYTYTYTYTYTYTYTY 540  
Bhutan-09030 YTYTYTYTYTYTYTYTYTYTYTYTYTYTYTYTYTYTYTYTYTYTYTYTYTYTYTYTYTY 540  
Bhutan-09005 TTTTTTTTTTTTTTTTTTTTTTTTTTTTTTTTTTTTTTTTTTTTTTTTTTTTTTTTTTTTT 540  
Indonesia-88035 TTTTTTTTTTTTTTTTTTTTTTTTTTTTTTTTTTTTTTTTTTTTTTTTTTTTTTTTTTTTT 540  
Indonesia-88045 TTTTTTTTTTTTTTTTTTTTTTTTTTTTTTTTTTTTTTTTTTTTTTTTTTTTTTTTTTTTT 540  
Indonesia-88065 TTTTTTTTTTTTTTTTTTTTTTTTTTTTTTTTTTTTTTTTTTTTTTTTTTTTTTTTTTTTT 540

Bhutan-09015 KKKTKGKKGKKGKKGKKGKKGKKGKKGKKGKKGKKGKKGKKGKKGKKGKKGKKGKKGK 597  
Bhutan-09024 KTKKGKKGKKGKKGKKGKKGKKGKKGKKGKKGKKGKKGKKGKKGKKGKKGKKGKKGK 597  
Bhutan-09027 GKKTGKKGKKGKKGKKGKKGKKGKKGKKGKKGKKGKKGKKGKKGKKGKKGKKGKKGK 597  
Bhutan-09030 GKKTGKKGKKGKKGKKGKKGKKGKKGKKGKKGKKGKKGKKGKKGKKGKKGKKGKKGK 597  
Bhutan-09005 GGGGGGGGGGGGGGGGGGGGGGGGGGGGGGGGGGGGGGGGGGGGGGGGGGGGGGGGGGG 597  
Indonesia-88035 GGGGGGGGGGGGGGGGGGGGGGGGGGGGGGGGGGGGGGGGGGGGGGGGGGGGGGGGGGG 597  
Indonesia-88045 GGGGGGGGGGGGGGGGGGGGGGGGGGGGGGGGGGGGGGGGGGGGGGGGGGGGGGGGGGG 597  
Indonesia-88065 GGGGGGGGGGGGGGGGGGGGGGGGGGGGGGGGGGGGGGGGGGGGGGGGGGGGGGGGGGG 597

..... . . . . .

## Supplementary Figure S7.

CLUSTAL 2.1 multiple sequence alignment

```

Bhutan-09015      AYGACTKRYKTTKSWKRMATKWAGGKTKWRRWRCTYRMYWYAATYRKWAKRGAYGMRR 60
Bhutan-09024      RTRACKKAYCTTTKSWKGYATTWAGGKTGAARWACTYMMYTTRAKYRKWMKGGAYMR 60
Bhutan-09027      RYGRCKKAYKYTKSWKRMATKWAGGKTKWARWRCWTRMCWYRRKTAGWMTRRMYR 60
Bhutan-09030      RYGAYTKAYCTYYKSWKRMATKWAGGKTKWARWRCWTRMCWYRRKTAGWMTRRMY 60
Bhutan-09005      RTGRYKSAKYKYTRMMSRWYAWKTAGGKTKWARARMWCAYYTTGRKYAGMASRRM 60
Indonesia-88035   ATTACTCRGCTTTTCAGGACMRKTKWSSKTTGARGCAMPYRYWYAATCRKCCSGG 60
Indonesia-88045   ATTACTSRCTYTGAGGACMRKTKWSSSTTGARGCRMWYRCTTTAAKCRKMCSSG 60
Indonesia-88065   AYAACRSRCTYYRAMSRWTAWKTAGGKKGARRARWTCACYTTGAKYAGMMSGGA 60
                  . . . . .

Bhutan-09015      RKGCRACRGGGATRYCCGYKWGGTSSRTCMTTTTGSYAKAYRRTRAAACKWSKY 120
Bhutan-09024      RKSYPGACGGGAKRMCRCGWRRTWGGGTCAWKKRSCAKATARYRAAACKASKCC 120
Bhutan-09027      AKSCWRRYRRRRRTACCMRYKWGGTWSGGKCATTKGSCAKAYRATGRRACTWS 120
Bhutan-09030      AKGCARRYRRRRRTACCMRYKWGGTWSRRKCAWTTGSCAGWYRATGAARMKWG 120
Bhutan-09005      ARSYWRACRRRRTACWMRYKRRRTWSGGTYMWKTARMYGAYTATGKAACWVG 120
Indonesia-88035   RGGCWGRYAGGRATRAACGCGARRKTSGGKKATTTGRMAKTTGRYRTRACW 120
Indonesia-88045   RGSWCWACAGGRRKRAACGCGAGGKTGSRRKATTKRMAKTTGRYRTAACWAS 120
Indonesia-88065   RRSCARACRGGAAATRAWCGCGARRYWSSRKYMTTTRGMYGWYTRYRTARMM 120
                  . . . . .

Bhutan-09015      AWYRAWKRASYRRWMKRRRYMCTGYRSTYTYAGWRYGTYGAARCTTSYTTTG 180
Bhutan-09024      AWTRAWKRRSYRRWMKGRRYMYSYGSTYTYAGWATGYKRAARYKWSYKKTGR 180
Bhutan-09027      AWYRRTGARGTGRTMTRRACAMYGYRSTYTYAGWATGYRRRRAYTTSTTTG 180
Bhutan-09030      RWTRRTGARSYRAWMTRRRYAMYGTGSWTTYRKWATGYKRARRYTWSTTTG 180
Bhutan-09005      ATTGATGARSYMRAWTRAACAMYCYRAWTYWAGAATWTGKRRRYTMTTTTG 180
Indonesia-88035   RKYKRWRKRSYARAWKGMRYMYGTGCTYTAAGCATTYGGRACKAAYKKYARK 180
Indonesia-88045   AKYKRWRKRGATARWTKGMRYMYGTRCTYTAAGCRYTYGGARAYKAMYKKT 180
Indonesia-88065   RKYGRWRKRSYAAWWKRMRYMCTCYRATYWRKAATWYGKRRRYKAMYKKY 180
                  . . . . .

Bhutan-09015      GRASRRKRYWYATTWRSKRGMAGAWTKGGWGYKWGSGSYSKASWWTGTWCT 240
Bhutan-09024      RRAGGRTRYATCKWWSKAGMMWGAWKGRGAGCKTGSGSTSRAKYWTAGKTM 240
Bhutan-09027      RRWGRRTRYWYMTWASTRGMWRRATGGGWGYKTGRRGTSGAKYTWRTGTCT 240
Bhutan-09030      GRWGRRTRYWYCTTWRSTAGMMWRRWTGGRWGCKTGSRGYSKAKYWWRTGT 240
Bhutan-09005      GSWRSRSTKKWMCTTAARARKWSAGRKTKRRWYCATGCRCYAGGTWWRGT 240
Indonesia-88035   AGTCAGTGTTATTWARGAAGACARAKKTGGASYTWTCGCTCMAGTTTGTAY 240
Indonesia-88045   AGTCAGTGTTAAKWRRGAAGACWRRKKTTRASYTWMCSTCTWGTTTATKCY 240
Indonesia-88065   ASWSGSKKKWMTTWARRARRWSWRKRRKRRAYCAWTCGSYYAYGTWTRRT 240
                  . . . . .

Bhutan-09015      YK 242
Bhutan-09024      MK 242
Bhutan-09027      YT 242
Bhutan-09030      CT 242
Bhutan-09005      YT 242
Indonesia-88035   CK 242
Indonesia-88045   CK 242
Indonesia-88065   CT 242
                  .

```

## Supplementary Figure S8.

CLUSTAL 2.1 multiple sequence alignment

```

Bhutan-09015      CGTATTGATCTAAACGCCCTGGAGTATATATAATTGATCTCACAGTGATTCTCAGAGCAGT  60
Bhutan-09024      CGTATTGATCTAAACGCCCTGGAGTATATATAATTGATCTCACAGTGATTCTCAGAGCAGT  60
Bhutan-09027      CGTATTGATCTAAACGCCCTGGAGTATATATAATTGATCTCACAGTGATTCTCAGAGCAGT  60
Bhutan-09030      CGTATTGATCTAAACGCCCTGGAGTATATATAATTGATCTCACAGTGATTCTCAGAGCAGT  60
Bhutan-09005      CGAGTCGAGCGAAGAGGCCGTAGTATGCATGCGTAATTTTCATAGACCTTACAGGACATGC  60
Indonesia-88035   TATAGTCGTTTAAACACATCGGGTACATTCAATCGGACATGCTATGAACCTCAGGGCAGT  60
Indonesia-88045   TATAGTAGTTTATACACATCGGTTTCATTCAATCGGACATGCTATGAACCTCAAGGCAGT  60
Indonesia-88065   TGAGTCAAGCGTAGAGGCCGTACCATGCATGCGTAATTTTCATAGACCTTACAGGACATCC  60

Bhutan-09015      ACGCACAGACAGTTTTACGTTACAGGTTTTAGACACGAAGCCGAGAAGTCCTCGGGTTTT  120
Bhutan-09024      ACGCACAGACAGTTTTACGTTACAGGTTTTAGACACGAAGCCGAGAAGTCCTCGGGTTTT  120
Bhutan-09027      ACGCACAGACAGTTTTACGTTACAGGTTTTAGACACGAAGCCGAGAAGTCCTCGGGTTTT  120
Bhutan-09030      ACGCACAGACAGTTTTACGTTACAGGTTTTAGACACGAAGCCGAGAAGTCCTCGGGTTTT  120
Bhutan-09005      ATACAAGGACAGCTAAGAGTCGCAAGTCCCAGTCAAAAAACCTAAAGCGGTATAAGTTTG  120
Indonesia-88035   ACGACCAAGATATCTTACTATAAGGTATTTCTAAGCGCTGTTGTGGAGTCCTCGGATCGT  120
Indonesia-88045   ACGACCAAGATATCTTACTATAAGGTATTTCTAAGCGCTGTAGTGGAGTCCTCGGACCGT  120
Indonesia-88065   TTACAAGGACAGCTAAGAGTCGCAAGTCCCAGTCAAGAAACATAAAGCGGTATAAGTTTG  120

Bhutan-09015      TCAAGCTCACGGACCTAGCACTTAGGTCGTGGGCACGTATATCGGATGGCGGTTGTCTG  180
Bhutan-09024      TCAAGCTCACGGACCTAGCACTTAGGTCGTGGGCACGTATATCGGATGGCGGTTGTCTG  180
Bhutan-09027      TCAAGCTCACGGACCTAGCACTTAGGTCGTGGGCACGTATATCGGATGGCGGTTGTCTG  180
Bhutan-09030      TCAAGCTCACGGACCTAGCACTTAGGTCGTGGGCACGTATATCGGATGGCGGTTGTCTG  180
Bhutan-09005      AATAGATCTTGCGCATTATGGTTGGGACATAAACGAAGTATTCGGTATGGTGTGTATCCG  180
Indonesia-88035   TCAGACCTACTGAGCCAGCACCCAGATTGAGGGTTTCACACATAAGCCAAACAGTAGCATA  180
Indonesia-88045   TCAGACCTACTGAGCCAGCACCCAAATTGAGGGTTTCACACATAAGCCAAACAGTAGCATA  180
Indonesia-88065   AATAGATCTTGCGCATTATGGTTGGGACATAAACGAAGTTTTCGGTATGGTGTGTATCCG  180

Bhutan-09015      CGGACATGTGGTGCTGTGCGACGATGGTGGGCCGCGGCCTAGAGGCCGTACTAGGCACCA  240
Bhutan-09024      CGGACATGTGGTGCTGTGCGACGATGGTGGGCCGCGGCCTAGAGGCCGTACTAGGCACCA  240
Bhutan-09027      CGGACATGTGGTGCTGTGCGACGATGGTGGGCCGCGGCCTAGAGGCCGTACTAGGCACCA  240
Bhutan-09030      CGGACATGTGGTGCTGTGCGACGATGGTGGGCCGCGGCCTAGAGGCCGTACTAGGCACCA  240
Bhutan-09005      CGGCGGAAGAGCATGGTTCAAGGAAGTCAGGTAACGGCCCTAAGACCGGATTAAGCCCCG  240
Indonesia-88035   AAAACATGTGATGCTTCGTGGCTTTAGTGAACCGTAGCCAAGTGGTTATTCGGGATAATA  240
Indonesia-88045   AAAACATGTGATGCTTCGTGGCTTTAGTGAACCGTAGACATGTGGCTTTTCGGGATAATA  240
Indonesia-88065   CGGCGGAAGAGCATGGTTCAAGGAAGTCAGGTAACGACTCAGATACCAGATTAAGCACCG  240

Bhutan-09015      CT 242
Bhutan-09024      CT 242
Bhutan-09027      CT 242
Bhutan-09030      CT 242
Bhutan-09005      CA 242
Indonesia-88035   CT 242
Indonesia-88045   AT 242
Indonesia-88065   CA 242

```

## Supplementary Figure S9.

CLUSTAL 2.1 multiple sequence alignment

|                 |      |
|-----------------|------|
| Bhutan-09015    | TG 2 |
| Bhutan-09024    | AA 2 |
| Bhutan-09027    | AA 2 |
| Bhutan-09030    | TG 2 |
| Bhutan-09005    | AG 2 |
| Indonesia-88035 | AG 2 |
| Indonesia-88045 | AG 2 |
| Indonesia-88065 | AG 2 |

## Supplementary Figure S10.

CLUSTAL 2.1 multiple sequence alignment

```

Bhutan-09015      SSRRRSMYRYKRWMKMWYKSRSRYRKWYRMYSWYMWKRKYSMYKWKMRKWSWSMWWKYR 60
Bhutan-09024      SSRRRSMYRYKRWMKMWYKSRSRYRKWYRMYSWYMWKRKYSMYKWKMRKWSWSMWWKYR 60
Bhutan-09027      SSRRRSMYRYKRWMKMWYKSRSRYRKWYRMYSWYMWKRKYSMYKWKMRKWSWSMWWKYR 60
Bhutan-09030      SSRRRSMYRYKRWMKMWYKSRKRYRKWYRMYSWYMMKRKYSMYKWKMRKWSWSMWWKYR 60
Bhutan-09005      YMMMMWSRKWSMSWWRKWSYSSSWYRMKYSMRMYYSMSMMRWRRSYKKYWKYYWMRYMM 60
Indonesia-88035   YMMMMWSRKWSMSWWRKWSYSSSWYRMKYSMRMYYSMSMMRWRRSYKKYWKYYWMRYMM 60
Indonesia-88045   YMMMMWSRKWSMSWWRKWSYSSSWYRMKYSMRMYYSMSMMRWRRSYKKYWKYYWMRYMM 60
Indonesia-88065   YMMMMWSRKWSMSWWRKWSYSSSWYRMKYSMRMYYSMSMMRWRRSYKKYWKYYWMRYMM 60
                  .           :           .       :: . : : . :
Bhutan-09015      MYKWWWSWKMRMRWRRRYWKYYSSSYMWKYKSKKRMYYWWMWRKSYMKMRMYR 120
Bhutan-09024      MYKWWWSWKMRMRWRRRYWKYYSSSYMWKYKSKKRMYYWWMWRKSYMKMRMYR 120
Bhutan-09027      MYKWWWSWKMRMRWRRRYWKYYSSSYMWKYKSKKRMYYWWMWRKSYMKMRMYR 120
Bhutan-09030      MYKWWWSWKMRMRWRRRYWKYYSSSYMWKYKSKKRMYYWWMWRKSYMKMRMYR 120
Bhutan-09005      WSKYYRMYWWWSYSSYKSKKRSYWWMKRKYRMMRRRWSMMKWWRRMWKMYWWMYMM 120
Indonesia-88035   WSKYYRMYWWWSYSSYKSKKRSYWWMKRKYRMMRRRWSMMKWWRRMWKMYWWMYMM 120
Indonesia-88045   WSKYYRMYWWWSYSSYKSKKRSYWWMKRKYRMMRRRWSMMKWWRRMWKMYWWMYMM 120
Indonesia-88065   WSKYYRMYWWWSYSSYKSKKRSYWWMKRKYRMMRRRWSMMKWWRRMWKMYWWMYMM 120
                  ::           : ::           :: .       : :           :           .           :
Bhutan-09015      KWRYSYRWYWKRRMYKQYWYMWWSMYSMSKSYRKRWRKCKMMKSRWMSRKMYSMKSYM 180
Bhutan-09024      KWRYSYRWYWKRRMYKQYWYMWWSMYSMSKSYRKRWRKCKMMKSRWMSRKMYSMKSYM 180
Bhutan-09027      KWRYSYRWYWKRRMYKQYWYMWWSMYSMSKSYRKRWRKCKMMKSRWMSRKMYSMKSYM 180
Bhutan-09030      KWRYSYRWYWKRRMYKQYWYMWWSMYSMSKSYRKRWRKCKMMKSRWMSRKMYSMKSYM 180
Bhutan-09005      WKRYMVKMWKWKSMRYSYMSKRWYRRRKMKYKWKYYSWRSRMRWYSWYMKRSRMR 180
Indonesia-88035   WKRYMVKMWKWKSMRYSYMSKRWYRRRKMKYKWKYYSWRSRMRWYSWYMKRSRMR 180
Indonesia-88045   WKRYMVKMWKWKSMRYSYMSKRWYRRRKMKYKWKYYSWRSRMRWYSWYMKRSRMR 180
Indonesia-88065   WKRYMVKMWKWKSMRYSYMSKRWYRRRKMKYKWKYYSWRSRMRWYSWYMKRSRMR 180
                  :           : :           : :           .       :           : :           :           .           .
Bhutan-09015      MKRYWKWYWYYSWYRM 197
Bhutan-09024      MKRYWKWYWYYSWYRM 197
Bhutan-09027      MKRYWKWYWYYSWYRM 197
Bhutan-09030      MKRYWKWYWYYSWYRM 197
Bhutan-09005      WWKWMRYMRSSMKYSKW 197
Indonesia-88035   WWKWMRYMRSSMKYSKW 197
Indonesia-88045   WWKWMRYMRSSMKYSKW 197
Indonesia-88065   WWKWMRYMRSSMKYSKW 197
                  :: ::           . : :

```
